# Supplementary material for: Isolation of two species of Caldatribacterium (Atribacterota) and the importance of folate for their culturability
Source: Research Square preprint supplement (doi:10.21203/rs.3.rs-6739887/v1), 2025-11-11
Supplement: Supplementary file 1 [file 6f7b92e062e20e0c66e18b69.xlsx]

## Sheet: Supplementary Data 1
Supplementary Data 1: Characteristics of Thermodesulfobacterium auxiliatoris isolate and comparison to other Thermodesulfobacterium species.
	T. auxiliatoris	T. geofontis	T. commune	T. hydrogeni-philum	T. hverager-dense	T. thermo-philum
Electron acceptors*
2 mM sulfate	+	+	+	+	+	+
2 mM sulfite	-	-	+	-	+	+
2 mM thiosulfate	-	+	+	-	+	+
1% elemental sulfur	-	+	-	-	-	NR
Electron donors*
0.66 atm H2 + 1 mM NaHCO3	+	+	+	+	-	-
1 mM formate	+	+	+	+	-	+
1 mM lactate	+	-	+	-	+	+
1 mM acetate	-	-	-	-	-	NR
1 mM pyruvate	-	-	+	-	+	+
1 mM benzoate	-	-	-	-	-	NR
1 mM ethanol	-	-	-	-	-	NR
0.05% fucose	-	NR	NR	NR	NR	NR
0.05% glucose	-	NR	NR	NR	NR	NR
0.05% xyloglucan	-	NR	NR	NR	NR	NR
Growth temp.
Minimum/maximum	50°C-80°C	65°C-90°C	60°C-80°C	50°C-80°C	55°C-74°C	NR
Optimum	70-75°C	83°C	70°C	75°C	70°C-74°C	65°C
pH range
Minimum/maximum	5.5-8.0	6.0-8.5	6.0-8.0	6.3-6.8	NR	NR
Optimum	7	6.5-7.0	7	6.5	7	NR
* Concentrations shown are those used for T. auxiliatoris.
NR, not reported
T. geofontis data from Hamilton-Brehm et al., Extremophiles 17:251-263 (2013)
T. commune data from Zeikus et al., J Gen Micro 129:1159-1169 (1983)
T. hydrogeniphilum data from Jeanthon et al., IJSEM 52:765-772 (2002)
T. hveragerdense data from Sonne-Hansen and Ahring, Syst Appl Microbiol 22:559–564 (1999)
T. thermophilum data from Rozanova and Khudyakova, Mikrobiologiya 43:908-912 (1974)

## Sheet: Supplementary Data 2
Supplementary Data 2: General characteristics of Atribacteria isolates.
Characteristic	Caldatribacterium inferamans SIUC1T (DSM 110249)	Caldatribacterium saccharofermentans GBST (DSM 110181)	Atribacter laminatus RT761T (DSM 105538)	Thermatribacter velox B11T	Thermatribacter velox MT5
Isolation source and depth	Borehole Inyo BLM 1 at ~751 m, CA, USA	Great Boiling Spring sediment, NV, USA	490–900 m sediment saline aquifer Mobara, Japan	Haoxian Oil Reservoir (1000-2000 m), Shengli Oilfield, China	Nakajo Gas Field (>1000 m), Niigata Prefecture, Japan
Morphology	Rod/ovoid with somewhat pointed ends	Rod/ovoid with somehwat pointed ends	Rod/ovoid with pointed ends	Rod/ovoid with pointed ends	Rod/ovoid with pointed ends
Cell size (length x width)	1.0 - 2.6 µm x 0.5 - 0.8 µm	1.5 - 3.0 µm x 0.5 - 0.9 µm	1.3-1.8 x 0.6 - 0.8 µm	0.6-1.9 x 0.4 - 0.5 µm	1.5–3.0 ×1.0 - 1.25 µm
Motility	Yes (rarely observed; genome encodes complete flagellar biosynthesis cluster)	Yes (rarely observed; genome encodes complete flagellar biosynthesis cluster)	No (genome does not encode a flagellar biosynthesis cluster)	No (genome encodes complete flagellar biosynthesis cluster)	No (genome encodes complete flagellar biosynthesis cluster)
Gram Stain	Variable	Variable	Negative	Negative	Negative
Cell ultrastructure	Three membrane-like layers with the inner compartment containing the nucleoid and little or no rRNA	Three membrane-like layers with the inner compartment containing the nucleoid and little or no rRNA	Three membrane-like layers with the inner compartment containing the nucleoid; ribsomes and total RNA are present in the inner compartment and outside of the inner compartment	Three membrane-like layers	Three membrane-like layers
Spore former	No	No	No	No	No
Optimal temperature for growth (oC) (range)	60-70 (55 - 75)	70 (60 - 77.5)	45 (20 - 50)	70 (45 - 75)	70–75 (45–75)
Optimal pH for growth (range)	7.4-8.7 (5.9 - 9.5)	7.0 (5.8 - 8.8)	7.3 (6.4 - 8.2)	6.5-7.0 (6.0-7.6)	7.5–8.0 (6.5–8.5)
Doubling time (hours)	7.6	8.3	122.4	7.6	11.4
Sole carbon source under fermentative conditions (no terminal electron except where specified)
Acetate	-	-	nd	nd	-
Adonitol	nd	+	nd	nd	nd
Arabinose	+	-	-	nd	+
Butyrate	-	-	nd	nd	-
Carboxymethylcellulose	nd	-	nd	nd	nd
Casamino acids	-	-	nd	nd	-
Cellobiose	+	+	+	nd	+
Cellulose	-	-	-	nd	-
Ethanol	-	-	nd	nd	-
Formate	-	-	nd	nd	-
Fructose	+	+	nd	+	+
Fucose	+	+	nd	nd	nd
Fumarate	+	-	nd	nd	-
Galactose	+	+	+	+	+
Gelatin	nd	nd	-	nd	nd
Gluconate	+	nd	nd	nd	nd
Glucose	+	+	+	+	+
Glycerol	-	-	nd	nd	-
H2/CO2	-	-	nd	nd	-
Inositol	-	+	nd	nd	nd
Lactose	+	+	-	+	+
Lyxose	nd	+	nd	nd	nd
Malate	-	-	nd	nd	-
Maltose	+	+	nd	nd	nd
Mannitol	+	-	+	nd	nd
Mannose	+	+	+	+	+
Melibiose	nd	nd	-	nd	nd
Methane	-	-	nd	nd	-
Methanol	-	-	nd	nd	-
N-acetylglucosamine	nd	+	nd	nd	nd
Oxaloacetate	-	nd	nd	nd	nd
Pectin	nd	nd	+	nd	nd
Peptone	+	-	nd	nd	nd
Propionate	-	-	nd	nd	-
Pyruvate	-	-	nd	nd	-
Raffinose	+	+	+	-	+
Rhamnose	nd	+	+	nd	nd
Ribose	-	+	-	+	+
Sorbitol	+	+	+	nd	nd
Starch	+	nd	-	-	-
Succinate	+	-	nd	nd	nd
Sucrose	+	+	+	nd	+
Tagatose	nd	+	nd	nd	nd
Trehalose	+	-	-	nd	+
Xylose	+	-	+	+	+
Xylitol	+	+	nd	nd	nd
Xylan	+	+	+	+	nd
Tryptone	nd	nd	nd	nd	+
Yeast extract	+	-	nd	+	+
Confirmed fermentation products (minor)	Hydrogen, acetate	Hydrogen, acetate	Hydrogen, acetate, CO2 (ethanol)	Hydrogen, acetate, CO2, formate (ethanol, butyrate)	Hydrogen, acetate
Utilization of terminal electron acceptors
Sulfate	-	-	nd	nd	nd
Sulfite	-	-	nd	nd	nd
Elemental sulfur	-	-	nd	nd	nd
Thiosulfate	-	-	nd	nd	nd
nd = not determined
- = no observed growth (or no sulfide detected for terminal electron acceptor experiments)
+ = Growth observed (>106 cells/mL) in our study or as reported elsewhere
Atribacter laminatus data from Katayama et al., 2020
Thermatribacter velox B11T data from Jiao et al., 2024
Thermatribacter velox MT5 data from Kawamoto et al., 2024

## Sheet: Supplementary Data 3
Supplementary Data 3. Genomes used for phylogenetic and genome distance analysis.
Familiy	Genus	Genomes	Accesion ID	GTDB-Tk classification	RED value	Completeness	Contamination	Strain heterogeneity	Location
Caldatribacteriaceae	Caldatribacterium	SIUC1T	CP189974	d__Bacteria;p__Atribacterota;c__Atribacteria;o__Atribacterales;f__Caldatribacteriaceae;g__Caldatribacterium;s__	0.98956	100	0	0	deep subsurface aquifer
		GBST	CP187957.1	d__Bacteria;p__Atribacterota;c__Atribacteria;o__Atribacterales;f__Caldatribacteriaceae;g__Caldatribacterium;s__Caldatribacterium saccharofermentans	N/A	100	1.69	100	hot spring from GBS
		77CS OP9 bin	GCA_000347575.1	d__Bacteria;p__Atribacterota;c__Atribacteria;o__Atribacterales;f__Caldatribacteriaceae;g__Caldatribacterium;s__Caldatribacterium saccharofermentans	N/A	99.44	6.39	28.57	in situ cellulolytic enrichments in hot spring GBS
		OP9-cSCG	GCA_000353875.1	d__Bacteria;p__Atribacterota;c__Atribacteria;o__Atribacterales;f__Caldatribacteriaceae;g__Caldatribacterium;s__Caldatribacterium californiense	N/A	96.61	0.15	0	single-cell genomic data for OP9 cells isolated from sediments of hot spring LHC4
		S1_Bin	GCA_937922705.1	d__Bacteria;p__Atribacterota;c__Atribacteria;o__Atribacterales;f__Caldatribacteriaceae;g__Caldatribacterium;s__	0.95859	100	0	0	coastal sea water
		SKYB28	GCA_025060675.1	d__Bacteria;p__Atribacterota;c__Atribacteria;o__Atribacterales;f__Caldatribacteriaceae;g__Caldatribacterium;s__Caldatribacterium sp025060675	N/A	100	0	0	alkaline hot spring
	CAKZPS01	SRR5214706_bin.38	GCA_937139415.1	d__Bacteria;p__Atribacterota;c__Atribacteria;o__Atribacterales;f__Caldatribacteriaceae;g__JABUEZ01;s__	0.86083	96.61	0	0	hot spring from South Africa
	JABUEZ01	Ch31	GCA_013314795.1	d__Bacteria;p__Atribacterota;c__Atribacteria;o__Atribacterales;f__Caldatribacteriaceae;g__JABUEZ01;s__JABUEZ01 sp013314795	N/A	93.42	1.85	100	2.8-km deep subsurface aquifer
	UBA3950	MAG-105	GCA_014359405.1	d__Bacteria;p__Atribacterota;c__Atribacteria;o__Atribacterales;f__Caldatribacteriaceae;g__Caldatribacterium;s__Caldatribacterium sp014359405	N/A	100	0.15	0	Shengli oilfield at Shandong province
		AS07pgkLD_82	GCA_012728195.1	d__Bacteria;p__Atribacterota;c__Atribacteria;o__Atribacterales;f__Caldatribacteriaceae;g__UBA3950;s__UBA3950 sp002385475	N/A	100	0	0	anaerobic digestion of organic wastes under variable temperature conditions and feedstocks
		JPNG_metabat.81	GCA_029780955.1	d__Bacteria;p__Atribacterota;c__Atribacteria;o__Atribacterales;f__Caldatribacteriaceae;g__UBA3950;s__UBA3950 sp002385475	N/A	100	2.54	50	wastewater treatment plant
		MAG2_SZBP	GCA_030058455.1	d__Bacteria;p__Atribacterota;c__Atribacteria;o__Atribacterales;f__Caldatribacteriaceae;g__UBA3950;s__UBA3950 sp002385475	N/A	98.31	0	0	anaerobic sludge from Szeged Biogas Plant
		CAAI_maxbin.019	GCA_029776175.1	d__Bacteria;p__Atribacterota;c__Atribacteria;o__Atribacterales;f__Caldatribacteriaceae;g__UBA3950;s__UBA3950 sp002385475	N/A	96.61	1.69	100	wastewater treatment plant
		STE_165	GCA_028697135.1	d__Bacteria;p__Atribacterota;c__Atribacteria;o__Atribacterales;f__Caldatribacteriaceae;g__UBA3950;s__UBA3950 sp002385475	N/A	99.15	0	0	landfill
		UBA3950	GCA_002385475.1	d__Bacteria;p__Atribacterota;c__Atribacteria;o__Atribacterales;f__Caldatribacteriaceae;g__UBA3950;s__UBA3950 sp002385475	N/A	93.22	1.69	100	anaerobic digester
		JPMR_maxbin.093	GCA_029552165.1	d__Bacteria;p__Atribacterota;c__Atribacteria;o__Atribacterales;f__Caldatribacteriaceae;g__UBA3950;s__UBA3950 sp002385475	N/A	100	0	0	anaerobic digester
		Gw_SlDig_bin_137	GCA_018056825.1	d__Bacteria;p__Atribacterota;c__Atribacteria;o__Atribacterales;f__Caldatribacteriaceae;g__UBA3950;s__UBA3950 sp018056825	N/A	83.05	0	0	wastewater
		USOA134.75	GCA_029549715.1	d__Bacteria;p__Atribacterota;c__Atribacteria;o__Atribacterales;f__Caldatribacteriaceae;g__;s__	0.88348	96.61	1.85	50	anaerobic digester
		DJKA113_NP-J24_bin.36	GCA_029982105.1	d__Bacteria;p__Atribacterota;c__Atribacteria;o__Atribacterales;f__Caldatribacteriaceae;g__UBA3950;s__	0.95651	63.1	0	0	produced fluids from hydraulically fractured shales
		RSWS11	GCA_028275365.1	d__Bacteria;p__Atribacterota;c__Atribacteria;o__Atribacterales;f__Caldatribacteriaceae;g__Caldatribacterium;s__	0.9857	88.93	0	0	hot spring from Yellowstone National Park
Thermatribacteraceae	Thermatribacter	B11T	GCA_038396615.1	d__Bacteria;p__Atribacterota;c__Atribacteria;o__Atribacterales;f__;g__;s__	0.66758	98.31	0	0	oily sludge from shandong, China
		M15T	AP028803.1	d__Bacteria;p__Atribacterota;c__Atribacteria;o__Atribacterales;f__;g__;s__	0.66797	98.31	0	0	deep subsurface from Japan
Atribacteraceae	Atribacter	UR.bin109	GCA_022707905.1	d__Bacteria;p__Atribacterota;c__Atribacteria;o__Atribacterales;f__Atribacteraceae;g__Atribacter;s__Atribacter sp002069605	N/A	100	0	0	anaerobic digester
		MAG25_SZBP	GCA_030058435.1	d__Bacteria;p__Atribacterota;c__Atribacteria;o__Atribacterales;f__Atribacteraceae;g__Atribacter;s__Atribacter sp002069605	N/A	100	0	0	anaerobic digester
		STE_161	GCA_028697175.1	d__Bacteria;p__Atribacterota;c__Atribacteria;o__Atribacterales;f__Atribacteraceae;g__Atribacter;s__Atribacter sp002069605	N/A	98.31	1.69	100	landfill leachate
		ADurb.Bin276	GCA_002069605.1	d__Bacteria;p__Atribacterota;c__Atribacteria;o__Atribacterales;f__Atribacteraceae;g__Atribacter;s__Atribacter sp002069605	N/A	100	0	0	anaerobic digester
		JPNA_maxbin.103	GCA_029547495.1	d__Bacteria;p__Atribacterota;c__Atribacteria;o__Atribacterales;f__Atribacteraceae;g__Atribacter;s__Atribacter sp002069605	N/A	100	5.17	0	anaerobic digester
		AS08sgBPME_53	GCA_012837485.1	d__Bacteria;p__Atribacterota;c__Atribacteria;o__Atribacterales;f__Atribacteraceae;g__Atribacter;s__Atribacter sp002069605	N/A	100	0	0	anaerobic digester
		RT761	GCF_015775515.1	d__Bacteria;p__Atribacterota;c__Atribacteria;o__Atribacterales;f__Atribacteraceae;g__Atribacter;s__Atribacter laminatus	N/A	100	0	0	gas production well settling pond from Japan
		Gw_SlDig_bin_239	GCA_018056205.1	d__Bacteria;p__Atribacterota;c__Atribacteria;o__Atribacterales;f__Atribacteraceae;g__Atribacter;s__Atribacter sp018056205	N/A	74.58	1.69	100	wastewater
		AS27yjCOA_164	GCA_012517635.1	d__Bacteria;p__Atribacterota;c__Atribacteria;o__Atribacterales;f__Atribacteraceae;g__Atribacter;s__Atribacter sp012517635	N/A	93.07	1.69	0	anaerobic digester

## Sheet: Supplementary Data 4
Supplementary Data 4. KEGG annotations for Atribacterota genomes.
			Caldatribacterium	Caldatribacterium	Caldatribacterium	Caldatribacterium	Caldatribacterium	Caldatribacterium	CAKZPS01	JABUEZ01	UBA3950	UBA3950	UBA3950	UBA3950	UBA3950	UBA3950	UBA3950	UBA3950	UBA3950	UBA3950	UBA3950	UBA3950	Thermatribacter	Thermatribacter	Atribacter	Atribacter	Atribacter	Atribacter	Atribacter	Atribacter	Atribacter	Atribacter	Atribacter
KEGG	Metabolism Category	KEGG annotation	SIUC1T	GBST	GCA_000347575.1	GCA_000353875.1	GCA_025060675.1	GCA_937922705.1	GCA_937139415.1	GCA_013314795.1	GCA_002385475.1	GCA_012728195.1	GCA_014359405.1	GCA_018056825.1	GCA_028275365.1	GCA_028697135.1	GCA_029549715.1	GCA_029552165.1	GCA_029776175.1	GCA_029780955.1	GCA_029982105.1	GCA_030058455.1	AP028803.1	GCA_038396615.1	GCA_002069605.1	GCA_012517635.1	GCA_012837485.1	GCA_015775515.1	GCA_018056205.1	GCA_022707905.1	GCA_028697175.1	GCA_029547495.1	GCA_030058435.1
K00001	Carbohydrate metabolism	E1.1.1.1, adh; alcohol dehydrogenase [EC:1.1.1.1]	2	3	4	5	2	1	2	3	1	1	3	1	2	0	0	0	0	0	1	1	2	1	0	1	0	0	0	0	1	1	0
K00003	Amino acid metabolism	hom; homoserine dehydrogenase [EC:1.1.1.3]	1	1	1	2	1	1	1	1	1	1	1	0	1	1	1	0	1	1	0	1	1	1	1	1	2	2	1	1	1	1	2
K00004	Carbohydrate metabolism	BDH, butB; (R,R)-butanediol dehydrogenase / meso-butanediol dehydrogenase / diacetyl reductase [EC:1.1.1.4 1.1.1.- 1.1.1.303]	0	0	0	0	0	0	0	0	0	0	0	0	1	0	0	0	0	0	0	0	0	0	1	1	1	0	0	1	1	3	1
K00008	Carbohydrate metabolism	SORD, gutB; L-iditol 2-dehydrogenase [EC:1.1.1.14]	11	15	13	14	13	10	21	14	11	11	11	8	11	9	6	11	9	4	12	12	13	13	12	17	17	17	8	14	14	14	18
K00008	Carbohydrate metabolism	SORD, gutB; L-iditol 2-dehydrogenase [EC:1.1.1.14]	11	15	13	14	13	10	21	14	11	11	11	8	11	9	6	11	9	4	12	12	13	13	12	17	17	17	8	14	14	14	18
K00009	Carbohydrate metabolism	mtlD; mannitol-1-phosphate 5-dehydrogenase [EC:1.1.1.17]	2	2	3	3	1	2	2	2	1	1	2	0	2	2	1	2	2	1	1	1	2	1	2	1	2	2	2	1	1	2	1
K00010	Carbohydrate metabolism	iolG; myo-inositol 2-dehydrogenase / D-chiro-inositol 1-dehydrogenase [EC:1.1.1.18 1.1.1.369]	0	0	0	1	0	1	1	0	1	1	0	0	0	1	0	1	0	1	0	1	1	1	1	1	1	1	0	1	1	0	1
K00012	Carbohydrate metabolism	UGDH, ugd; UDPglucose 6-dehydrogenase [EC:1.1.1.22]	1	0	0	0	0	0	0	0	0	0	0	0	0	0	0	0	0	0	0	0	1	1	0	0	1	1	0	0	0	0	0
K00013	Amino acid metabolism	hisD; histidinol dehydrogenase [EC:1.1.1.23]	2	2	2	2	2	2	2	2	2	2	2	0	2	2	2	2	2	2	1	2	2	2	1	2	4	2	1	2	1	2	1
K00014	Amino acid metabolism	aroE; shikimate dehydrogenase [EC:1.1.1.25]	2	2	2	2	2	2	2	2	2	2	2	1	2	3	2	3	4	3	0	2	2	2	3	1	3	4	1	4	4	3	3
K00015	Carbohydrate metabolism	gyaR, GOR1; glyoxylate reductase [EC:1.1.1.26]	1	1	1	1	1	1	1	1	1	1	1	1	1	1	0	1	1	0	2	1	1	1	1	1	1	1	0	1	1	1	1
K00016	Carbohydrate metabolism	LDH, ldh; L-lactate dehydrogenase [EC:1.1.1.27]	0	0	0	0	0	0	1	1	0	0	0	0	0	0	0	0	0	0	0	0	0	0	1	1	1	1	0	1	1	1	1
K00018	Carbohydrate metabolism	hprA; glycerate dehydrogenase [EC:1.1.1.29]	0	0	1	0	0	0	0	0	0	0	0	0	0	0	0	0	0	0	0	0	0	0	0	0	0	0	0	0	0	0	0
K00020	Amino acid metabolism	HIBADH, mmsB; 3-hydroxyisobutyrate dehydrogenase [EC:1.1.1.31]	0	0	0	0	0	0	0	0	0	0	0	0	0	0	0	0	0	0	0	0	0	0	1	1	1	1	1	1	1	1	1
K00024	Carbohydrate metabolism	mdh; malate dehydrogenase [EC:1.1.1.37]	0	0	0	0	0	0	0	0	0	0	0	0	0	0	0	0	0	0	0	0	0	0	0	0	1	0	0	0	1	1	1
K00027	Carbohydrate metabolism	ME2, sfcA, maeA; malate dehydrogenase (oxaloacetate-decarboxylating) [EC:1.1.1.38]	1	1	1	1	1	1	1	1	1	1	1	0	1	1	1	1	1	1	1	0	1	1	1	1	1	1	0	1	1	1	1
K00030	Carbohydrate metabolism	IDH3; isocitrate dehydrogenase (NAD+) [EC:1.1.1.41]	1	1	1	1	1	1	1	1	0	1	1	0	1	1	1	1	1	1	1	1	1	1	1	1	1	1	1	1	1	1	1
K00033	Carbohydrate metabolism	PGD, gnd, gntZ; 6-phosphogluconate dehydrogenase [EC:1.1.1.44 1.1.1.343]	1	1	2	2	1	2	2	1	2	2	2	0	1	2	1	2	2	3	0	2	2	2	2	1	2	1	0	2	1	2	2
K00036	Carbohydrate metabolism	G6PD, zwf; glucose-6-phosphate 1-dehydrogenase [EC:1.1.1.49 1.1.1.363]	2	2	2	2	2	3	2	2	2	2	3	0	2	2	1	3	2	2	2	2	2	2	3	3	3	4	1	3	1	3	2
K00042	Carbohydrate metabolism	garR, glxR; 2-hydroxy-3-oxopropionate reductase [EC:1.1.1.60]	0	0	0	0	0	0	0	0	1	1	0	0	0	1	1	2	1	1	0	1	0	0	1	1	1	1	1	1	1	1	1
K00042	Carbohydrate metabolism	garR, glxR; 2-hydroxy-3-oxopropionate reductase [EC:1.1.1.60]	0	0	0	0	0	0	0	0	1	1	0	0	0	1	1	2	1	1	0	1	0	0	1	1	1	1	1	1	1	1	1
K00046	Unclassified: metabolism	idnO; gluconate 5-dehydrogenase [EC:1.1.1.69]	0	0	0	1	0	0	1	0	0	0	0	0	0	0	0	0	0	0	0	0	0	0	0	0	0	0	0	0	0	0	0
K00052	Carbohydrate metabolism	leuB, IMDH; 3-isopropylmalate dehydrogenase [EC:1.1.1.85]	1	1	1	1	1	1	1	1	1	2	1	0	1	1	1	1	2	1	1	1	1	1	1	1	1	1	1	1	1	1	1
K00053	Amino acid metabolism	ilvC; ketol-acid reductoisomerase [EC:1.1.1.86]	1	1	1	1	1	1	1	1	1	1	1	0	1	1	2	1	1	1	0	1	1	1	1	2	1	1	1	1	1	1	1
K00058	Energy metabolism	serA, PHGDH; D-3-phosphoglycerate dehydrogenase / 2-oxoglutarate reductase [EC:1.1.1.95 1.1.1.399]	5	6	6	8	5	6	7	6	5	6	5	5	5	5	5	6	7	7	4	5	7	7	5	6	6	4	4	6	4	5	4
K00058	Energy metabolism	serA, PHGDH; D-3-phosphoglycerate dehydrogenase / 2-oxoglutarate reductase [EC:1.1.1.95 1.1.1.399]	5	6	6	8	5	6	7	6	5	6	5	5	5	5	5	6	7	7	4	5	7	7	5	6	6	4	4	6	4	5	4
K00059	Lipid metabolism	fabG, OAR1; 3-oxoacyl-[acyl-carrier protein] reductase [EC:1.1.1.100]	1	1	1	1	1	1	2	3	0	0	1	0	1	0	0	0	0	0	0	0	2	2	2	3	1	3	0	2	1	2	1
K00060	Amino acid metabolism	tdh; threonine 3-dehydrogenase [EC:1.1.1.103]	0	0	0	0	0	0	1	1	1	1	0	0	1	1	0	0	1	0	0	1	1	1	0	1	1	1	0	1	0	0	1
K00060	Amino acid metabolism	tdh; threonine 3-dehydrogenase [EC:1.1.1.103]	0	0	0	0	0	0	1	1	1	1	0	0	1	1	0	0	1	0	0	1	1	1	0	1	1	1	0	1	0	0	1
K00067	Glycan biosynthesis and metabolism	rfbD, rmlD; dTDP-4-dehydrorhamnose reductase [EC:1.1.1.133]	0	0	1	0	1	0	1	0	0	1	1	0	0	1	1	1	0	0	1	1	1	1	0	0	0	0	0	0	0	0	0
K00075	Carbohydrate metabolism	murB; UDP-N-acetylmuramate dehydrogenase [EC:1.3.1.98]	1	1	1	1	1	1	1	1	1	1	1	0	1	1	1	1	1	1	0	1	1	1	1	2	1	1	1	1	1	1	1
K00077	Metabolism of cofactors and vitamins	panE, apbA; 2-dehydropantoate 2-reductase [EC:1.1.1.169]	0	1	1	0	0	1	0	0	0	0	0	0	0	0	0	0	0	0	0	0	0	0	0	0	0	0	0	0	0	0	0
K00086	Carbohydrate metabolism	dhaT; 1,3-propanediol dehydrogenase [EC:1.1.1.202]	1	2	3	3	0	0	0	2	0	0	1	1	1	0	0	0	0	0	1	0	0	1	0	1	1	1	1	0	1	1	0
K00086	Carbohydrate metabolism	dhaT; 1,3-propanediol dehydrogenase [EC:1.1.1.202]	1	2	3	3	0	0	0	2	0	0	1	1	1	0	0	0	0	0	1	0	0	1	0	1	1	1	1	0	1	1	0
K00088	Nucleotide metabolism	IMPDH, guaB; IMP dehydrogenase [EC:1.1.1.205]	1	1	1	1	1	1	1	1	1	1	1	1	1	1	2	1	0	3	1	1	1	1	1	1	1	1	0	1	1	1	1
K00091	Unclassified: metabolism	E1.1.1.219; dihydroflavonol-4-reductase [EC:1.1.1.219]	0	0	0	0	0	0	0	0	0	0	0	0	0	0	0	0	0	0	0	0	0	0	0	1	0	0	0	0	0	0	0
K00094	Carbohydrate metabolism	E1.1.1.251, gatD; galactitol-1-phosphate 5-dehydrogenase [EC:1.1.1.251]	0	0	0	0	0	0	0	0	0	0	0	0	1	0	0	0	0	0	0	0	0	0	0	0	0	0	0	0	0	0	0
K00096	Lipid metabolism	araM, egsA; glycerol-1-phosphate dehydrogenase [NAD(P)+] [EC:1.1.1.261]	1	1	1	1	1	1	1	1	0	1	1	1	1	1	1	0	1	0	1	1	1	1	1	1	1	1	0	1	1	1	1
K00097	Metabolism of cofactors and vitamins	pdxA; 4-hydroxythreonine-4-phosphate dehydrogenase [EC:1.1.1.262]	1	1	1	1	1	1	1	1	1	1	1	1	1	1	1	0	1	1	0	1	1	1	2	1	1	1	2	1	1	2	1
K00099	Metabolism of terpenoids and polyketides	dxr; 1-deoxy-D-xylulose-5-phosphate reductoisomerase [EC:1.1.1.267]	1	1	1	1	1	1	1	1	1	1	1	1	1	1	1	1	1	1	1	1	1	1	1	1	1	1	1	1	1	1	1
K00100	Carbohydrate metabolism	bdhAB; butanol dehydrogenase [EC:1.1.1.-]	2	2	3	2	4	2	2	2	2	2	1	1	2	2	0	2	4	2	1	2	2	1	1	0	1	1	0	1	1	1	1
K00100	Carbohydrate metabolism	bdhAB; butanol dehydrogenase [EC:1.1.1.-]	2	2	3	2	4	2	2	2	2	2	1	1	2	2	0	2	4	2	1	2	2	1	1	0	1	1	0	1	1	1	1
K00104	Carbohydrate metabolism	glcD; glycolate dehydrogenase FAD-linked subunit [EC:1.1.99.14]	0	0	0	0	0	0	0	0	0	0	0	0	0	0	0	0	0	0	0	0	1	1	1	0	1	2	1	1	1	1	1
K00111	Lipid metabolism	glpA, glpD; glycerol-3-phosphate dehydrogenase [EC:1.1.5.3]	1	1	2	1	1	1	1	1	1	1	1	1	1	1	1	1	1	1	0	1	1	1	1	3	1	1	1	1	1	1	1
K00117	Carbohydrate metabolism	gcd; quinoprotein glucose dehydrogenase [EC:1.1.5.2]	0	0	0	0	0	0	1	0	0	0	0	0	0	0	0	0	0	0	0	0	0	0	1	0	2	1	0	1	2	1	1
K00118	Unclassified: metabolism	gfo; glucose-fructose oxidoreductase [EC:1.1.99.28]	1	1	1	1	2	1	1	1	1	1	1	0	1	1	0	1	0	2	0	1	0	1	1	1	1	1	1	1	1	1	1
K00123	Carbohydrate metabolism	fdoG, fdhF, fdwA; formate dehydrogenase major subunit [EC:1.17.1.9]	0	0	0	1	0	0	0	0	0	0	1	0	0	0	0	0	0	0	0	0	0	0	0	0	0	0	0	0	0	0	0
K00125	Energy metabolism	fdhB; formate dehydrogenase (coenzyme F420) beta subunit [EC:1.17.98.3 1.8.98.6]	0	1	1	0	0	0	0	1	0	0	1	0	0	0	0	0	0	0	0	0	0	0	1	1	0	1	1	1	0	1	1
K00128	Carbohydrate metabolism	ALDH; aldehyde dehydrogenase (NAD+) [EC:1.2.1.3]	0	0	0	0	0	0	0	0	1	1	0	0	0	1	0	1	1	1	0	1	0	0	0	0	0	0	0	0	0	0	0
K00133	Amino acid metabolism	asd; aspartate-semialdehyde dehydrogenase [EC:1.2.1.11]	1	1	1	1	1	1	1	1	1	1	1	0	0	1	0	1	1	1	0	1	1	1	1	1	1	1	0	1	1	1	1
K00134	Carbohydrate metabolism	GAPDH, gapA; glyceraldehyde 3-phosphate dehydrogenase (phosphorylating) [EC:1.2.1.12]	1	1	1	1	1	1	1	1	1	1	1	1	1	2	0	1	1	1	1	1	1	1	1	1	1	1	1	2	1	1	1
K00135	Carbohydrate metabolism	gabD; succinate-semialdehyde dehydrogenase / glutarate-semialdehyde dehydrogenase [EC:1.2.1.16 1.2.1.79 1.2.1.20]	1	1	4	4	1	2	2	2	0	0	1	0	2	0	1	0	1	0	1	0	2	2	1	2	1	1	1	1	1	1	1
K00145	Amino acid metabolism	argC; N-acetyl-gamma-glutamyl-phosphate reductase [EC:1.2.1.38]	1	1	1	1	1	1	1	1	1	1	1	1	1	1	1	1	1	1	1	1	1	1	1	1	1	1	0	1	0	1	1
K00147	Amino acid metabolism	proA; glutamate-5-semialdehyde dehydrogenase [EC:1.2.1.41]	1	1	1	1	1	1	1	1	1	1	1	0	1	1	1	1	1	1	1	1	1	1	1	1	1	1	0	1	1	1	1
K00161	Carbohydrate metabolism	PDHA, pdhA; pyruvate dehydrogenase E1 component alpha subunit [EC:1.2.4.1]	2	2	1	2	2	2	2	3	2	2	2	1	2	1	0	2	1	1	2	2	2	2	2	2	2	2	2	2	2	2	3
K00162	Carbohydrate metabolism	PDHB, pdhB; pyruvate dehydrogenase E1 component beta subunit [EC:1.2.4.1]	1	1	0	2	1	1	1	4	2	2	1	3	1	0	1	0	0	0	1	2	1	1	3	3	3	4	1	3	2	3	3
K00169	Carbohydrate metabolism	porA; pyruvate ferredoxin oxidoreductase alpha subunit [EC:1.2.7.1]	1	1	1	1	1	1	1	1	1	1	1	1	1	1	1	1	1	1	0	1	1	1	0	0	0	0	0	0	0	0	0
K00170	Carbohydrate metabolism	porB; pyruvate ferredoxin oxidoreductase beta subunit [EC:1.2.7.1]	1	1	1	1	1	1	1	1	1	1	1	1	1	1	1	1	1	1	0	1	1	1	0	0	0	0	0	0	0	0	0
K00171	Carbohydrate metabolism	porD; pyruvate ferredoxin oxidoreductase delta subunit [EC:1.2.7.1]	1	1	1	1	1	1	1	1	1	1	1	1	1	1	1	1	1	1	0	1	1	1	0	0	0	0	0	0	0	0	0
K00172	Carbohydrate metabolism	porC, porG; pyruvate ferredoxin oxidoreductase gamma subunit [EC:1.2.7.1]	2	2	2	2	2	2	2	2	2	2	2	2	2	2	2	2	2	2	0	2	2	2	0	0	0	0	0	0	0	0	0
K00172	Carbohydrate metabolism	porC, porG; pyruvate ferredoxin oxidoreductase gamma subunit [EC:1.2.7.1]	2	2	2	2	2	2	2	2	2	2	2	2	2	2	2	2	2	2	0	2	2	2	0	0	0	0	0	0	0	0	0
K00174	Carbohydrate metabolism	korA, oorA, oforA; 2-oxoglutarate/2-oxoacid ferredoxin oxidoreductase subunit alpha [EC:1.2.7.3 1.2.7.11]	2	2	2	2	2	2	2	3	2	2	3	1	2	2	1	2	2	2	0	2	2	2	3	2	2	2	1	2	2	2	2
K00175	Carbohydrate metabolism	korB, oorB, oforB; 2-oxoglutarate/2-oxoacid ferredoxin oxidoreductase subunit beta [EC:1.2.7.3 1.2.7.11]	2	2	2	2	2	2	2	2	2	2	2	1	2	2	1	2	2	2	0	2	2	2	2	3	2	2	1	2	2	2	2
K00176	Carbohydrate metabolism	korD, oorD; 2-oxoglutarate ferredoxin oxidoreductase subunit delta [EC:1.2.7.3]	1	1	1	1	2	2	1	1	1	1	2	1	2	1	1	1	1	1	0	1	2	2	2	1	1	1	0	1	1	1	1
K00177	Carbohydrate metabolism	korC, oorC; 2-oxoglutarate ferredoxin oxidoreductase subunit gamma [EC:1.2.7.3]	1	1	1	1	1	1	1	1	1	1	1	1	1	1	1	1	1	1	0	1	1	1	1	1	1	1	1	1	1	1	1
K00179	Unclassified: metabolism	iorA; indolepyruvate ferredoxin oxidoreductase, alpha subunit [EC:1.2.7.8]	1	1	1	2	1	1	1	1	0	0	1	0	1	0	0	0	0	0	0	0	1	1	1	1	1	1	0	1	1	1	1
K00180	Unclassified: metabolism	iorB; indolepyruvate ferredoxin oxidoreductase, beta subunit [EC:1.2.7.8]	1	1	0	1	1	1	1	1	0	0	1	0	1	0	0	0	0	0	0	0	1	1	1	1	1	1	0	1	1	1	1
K00186	Amino acid metabolism	vorA; 2-oxoisovalerate ferredoxin oxidoreductase alpha subunit [EC:1.2.7.7]	1	1	1	1	1	1	1	2	1	1	1	1	1	1	1	1	1	1	0	1	1	1	1	1	1	1	1	1	1	1	1
K00187	Amino acid metabolism	vorB; 2-oxoisovalerate ferredoxin oxidoreductase beta subunit [EC:1.2.7.7]	1	1	1	1	1	1	1	1	1	1	1	1	1	1	1	1	1	1	0	1	1	1	1	1	1	1	1	1	1	1	1
K00194	Energy metabolism	cdhD, acsD; acetyl-CoA decarbonylase/synthase, CODH/ACS complex subunit delta [EC:2.1.1.245]	0	0	0	0	0	0	0	1	0	0	0	0	0	0	0	1	0	0	0	0	1	1	0	1	0	0	1	0	0	0	0
K00196	Energy metabolism	cooF; anaerobic carbon-monoxide dehydrogenase iron sulfur subunit	0	1	1	1	1	0	1	1	0	0	0	1	1	1	0	0	0	0	0	0	0	1	0	1	0	1	0	0	0	0	0
K00197	Energy metabolism	cdhE, acsC; acetyl-CoA decarbonylase/synthase, CODH/ACS complex subunit gamma [EC:2.1.1.245]	1	0	0	1	0	0	0	0	0	0	0	0	0	0	0	0	0	0	0	0	0	0	0	0	0	0	0	0	0	0	0
K00198	Energy metabolism	cooS, acsA; anaerobic carbon-monoxide dehydrogenase catalytic subunit [EC:1.2.7.4]	0	0	0	0	0	0	0	1	0	0	0	0	0	0	0	1	0	0	0	0	1	1	0	1	0	0	1	0	0	0	0
K00209	Carbohydrate metabolism	fabV, ter; enoyl-[acyl-carrier protein] reductase / trans-2-enoyl-CoA reductase (NAD+) [EC:1.3.1.9 1.3.1.44]	0	3	3	6	0	0	0	2	0	1	2	0	2	0	1	1	1	1	0	1	1	1	0	0	0	0	0	0	0	0	0
K00210	N/A	N/A	3	3	3	3	2	3	3	3	3	3	3	3	3	3	3	3	3	3	1	3	3	3	3	3	3	3	1	3	3	3	3
K00211	Amino acid metabolism	TYR1; prephenate dehydrogenase (NADP+) [EC:1.3.1.13]	1	1	1	0	0	1	2	1	0	0	1	0	0	0	0	0	0	0	0	0	0	0	0	0	0	1	0	0	0	0	1
K00215	Amino acid metabolism	dapB; 4-hydroxy-tetrahydrodipicolinate reductase [EC:1.17.1.8]	1	1	1	1	1	1	1	1	1	1	1	1	1	1	1	1	1	1	1	1	1	1	1	2	1	1	0	1	1	0	1
K00219	Unclassified: metabolism	fadH; 2,4-dienoyl-CoA reductase (NADPH2) [EC:1.3.1.34]	0	0	0	1	0	0	0	0	0	0	0	0	0	0	0	0	0	0	1	0	0	0	0	0	0	0	0	0	0	0	0
K00220	Amino acid metabolism	tyrC; cyclohexadieny/prephenate dehydrogenase [EC:1.3.1.43 1.3.1.12]	3	3	3	3	2	3	3	3	3	3	3	3	3	3	3	3	3	3	1	3	3	3	3	3	3	3	1	3	3	3	3
K00226	Nucleotide metabolism	pyrD; dihydroorotate dehydrogenase (fumarate) [EC:1.3.98.1]	1	1	1	2	1	1	1	1	1	1	1	0	1	1	1	1	1	1	1	1	2	1	2	2	2	2	0	2	1	3	2
K00230	Metabolism of cofactors and vitamins	hemG; menaquinone-dependent protoporphyrinogen oxidase [EC:1.3.5.3]	0	0	0	0	0	0	0	0	0	0	1	0	0	0	0	0	0	0	0	0	0	0	0	0	0	0	0	0	0	0	0
K00239	Carbohydrate metabolism	sdhA, frdA; succinate dehydrogenase flavoprotein subunit [EC:1.3.5.1]	0	0	0	0	0	0	0	0	1	1	0	0	0	1	0	0	1	0	0	1	0	0	0	0	0	0	0	0	0	0	0
K00244	Carbohydrate metabolism	frdA; succinate dehydrogenase flavoprotein subunit [EC:1.3.5.1]	1	2	1	2	1	1	1	2	2	2	1	1	2	3	1	2	2	2	0	2	1	1	1	1	1	2	1	1	1	1	1
K00244	Carbohydrate metabolism	frdA; succinate dehydrogenase flavoprotein subunit [EC:1.3.5.1]	1	2	1	2	1	1	1	2	2	2	1	1	2	3	1	2	2	2	0	2	1	1	1	1	1	2	1	1	1	1	1
K00259	Amino acid metabolism	ald; alanine dehydrogenase [EC:1.4.1.1]	0	1	0	1	0	0	1	1	1	1	0	0	1	2	0	1	1	1	0	1	0	0	0	0	0	1	0	0	0	0	0
K00259	Amino acid metabolism	ald; alanine dehydrogenase [EC:1.4.1.1]	0	1	0	1	0	0	1	1	1	1	0	0	1	2	0	1	1	1	0	1	0	0	0	0	0	1	0	0	0	0	0
K00260	Energy metabolism	gudB, rocG; glutamate dehydrogenase [EC:1.4.1.2]	1	0	0	0	0	1	1	1	0	0	0	0	0	0	0	0	0	0	0	0	0	1	1	1	1	1	1	1	1	1	1
K00261	Energy metabolism	GLUD1_2, gdhA; glutamate dehydrogenase (NAD(P)+) [EC:1.4.1.3]	1	0	0	0	0	1	2	2	1	1	0	0	0	1	2	0	1	0	0	1	0	1	4	2	3	3	2	4	4	4	4
K00261	Energy metabolism	GLUD1_2, gdhA; glutamate dehydrogenase (NAD(P)+) [EC:1.4.1.3]	1	0	0	0	0	1	2	2	1	1	0	0	0	1	2	0	1	0	0	1	0	1	4	2	3	3	2	4	4	4	4
K00262	Energy metabolism	E1.4.1.4, gdhA; glutamate dehydrogenase (NADP+) [EC:1.4.1.4]	1	0	0	0	0	1	1	1	0	0	0	0	0	0	1	0	0	0	0	0	1	1	2	1	2	1	1	2	2	2	2
K00262	Energy metabolism	E1.4.1.4, gdhA; glutamate dehydrogenase (NADP+) [EC:1.4.1.4]	1	0	0	0	0	1	1	1	0	0	0	0	0	0	1	0	0	0	0	0	1	1	2	1	2	1	1	2	2	2	2
K00265	Energy metabolism	gltB; glutamate synthase (NADPH) large chain [EC:1.4.1.13]	1	1	1	2	2	1	2	1	1	1	0	1	2	2	0	1	1	1	0	1	1	2	0	2	1	1	0	0	0	0	0
K00266	Energy metabolism	gltD; glutamate synthase (NADPH) small chain [EC:1.4.1.13]	2	2	4	2	2	2	2	3	2	2	4	0	2	2	1	4	2	2	0	2	5	2	2	3	2	2	2	2	2	3	2
K00266	Energy metabolism	gltD; glutamate synthase (NADPH) small chain [EC:1.4.1.13]	2	2	4	2	2	2	2	3	2	2	4	0	2	2	1	4	2	2	0	2	5	2	2	3	2	2	2	2	2	3	2
K00275	Metabolism of cofactors and vitamins	pdxH, PNPO; pyridoxamine 5'-phosphate oxidase [EC:1.4.3.5]	0	0	0	0	0	0	0	0	0	0	0	0	0	0	0	0	0	0	0	0	0	0	1	1	1	1	0	1	1	1	1
K00278	Amino acid metabolism	nadB; L-aspartate oxidase [EC:1.4.3.16]	2	2	2	2	2	2	2	2	3	3	2	3	2	3	2	2	3	2	0	3	3	2	3	3	4	2	2	2	2	3	2
K00278	Amino acid metabolism	nadB; L-aspartate oxidase [EC:1.4.3.16]	2	2	2	2	2	2	2	2	3	3	2	3	2	3	2	2	3	2	0	3	3	2	3	3	4	2	2	2	2	3	2
K00281	Carbohydrate metabolism	GLDC, gcvP; glycine dehydrogenase [EC:1.4.4.2]	0	0	0	0	0	0	0	0	1	1	0	0	0	1	0	2	1	1	0	1	0	0	1	0	1	1	0	1	1	1	1
K00282	Carbohydrate metabolism	gcvPA; glycine dehydrogenase subunit 1 [EC:1.4.4.2]	0	0	0	0	0	0	0	0	1	2	0	0	0	1	0	2	2	1	0	1	2	1	1	0	1	1	1	1	1	1	1
K00282	Carbohydrate metabolism	gcvPA; glycine dehydrogenase subunit 1 [EC:1.4.4.2]	0	0	0	0	0	0	0	0	1	2	0	0	0	1	0	2	2	1	0	1	2	1	1	0	1	1	1	1	1	1	1
K00283	Carbohydrate metabolism	gcvPB; glycine dehydrogenase subunit 2 [EC:1.4.4.2]	0	0	0	0	0	0	0	0	1	1	0	0	0	2	0	1	1	1	0	1	0	0	1	0	1	1	0	1	1	1	1
K00284	Carbohydrate metabolism	GLU, gltS; glutamate synthase (ferredoxin) [EC:1.4.7.1]	0	1	1	1	1	0	1	1	0	0	0	1	1	1	0	0	0	0	0	0	0	1	0	2	0	1	0	0	0	0	0
K00286	Amino acid metabolism	proC; pyrroline-5-carboxylate reductase [EC:1.5.1.2]	1	1	1	1	1	1	1	1	2	2	1	2	1	2	1	2	3	2	1	2	1	1	1	1	1	1	1	1	1	1	1
K00288	Metabolism of cofactors and vitamins	MTHFD; methylenetetrahydrofolate dehydrogenase (NADP+) / methenyltetrahydrofolate cyclohydrolase / formyltetrahydrofolate synthetase [EC:1.5.1.5 3.5.4.9 6.3.4.3]	1	1	1	2	1	1	1	1	1	1	2	1	1	1	0	1	1	1	0	1	1	1	1	1	2	1	1	1	0	1	1
K00297	Energy metabolism	metF, MTHFR; methylenetetrahydrofolate reductase (NADH) [EC:1.5.1.54]	2	2	4	2	2	2	2	2	1	1	2	1	3	1	0	2	1	1	1	1	2	2	1	1	1	1	1	1	1	1	1
K00297	Energy metabolism	metF, MTHFR; methylenetetrahydrofolate reductase (NADH) [EC:1.5.1.54]	2	2	4	2	2	2	2	2	1	1	2	1	3	1	0	2	1	1	1	1	2	2	1	1	1	1	1	1	1	1	1
K00324	Metabolism of cofactors and vitamins	pntA; H+-translocating NAD(P) transhydrogenase subunit alpha [EC:1.6.1.2 7.1.1.1]	0	0	0	0	0	0	0	0	0	0	0	0	0	0	2	0	0	0	0	0	0	0	2	0	2	0	0	2	2	2	2
K00325	Metabolism of cofactors and vitamins	pntB; H+-translocating NAD(P) transhydrogenase subunit beta [EC:1.6.1.2 7.1.1.1]	0	0	0	0	0	0	0	0	0	0	0	0	0	0	1	0	0	0	0	0	0	0	1	0	1	0	0	1	1	1	1
K00334	Energy metabolism	nuoE; NADH-quinone oxidoreductase subunit E [EC:7.1.1.2]	3	3	4	1	3	3	3	3	3	2	3	2	2	2	2	2	2	2	3	2	3	3	3	3	3	3	3	4	3	3	3
K00335	Energy metabolism	nuoF; NADH-quinone oxidoreductase subunit F [EC:7.1.1.2]	4	4	5	2	4	4	4	3	5	5	4	3	4	6	4	5	5	5	6	7	4	4	5	4	5	5	5	7	5	5	5
K00335	Energy metabolism	nuoF; NADH-quinone oxidoreductase subunit F [EC:7.1.1.2]	4	4	5	2	4	4	4	3	5	5	4	3	4	6	4	5	5	5	6	7	4	4	5	4	5	5	5	7	5	5	5
K00336	Energy metabolism	nuoG; NADH-quinone oxidoreductase subunit G [EC:7.1.1.2]	2	2	2	3	2	2	2	2	2	2	2	1	2	2	2	2	2	2	2	2	2	2	2	2	2	2	2	2	2	2	2
K00336	Energy metabolism	nuoG; NADH-quinone oxidoreductase subunit G [EC:7.1.1.2]	2	2	2	3	2	2	2	2	2	2	2	1	2	2	2	2	2	2	2	2	2	2	2	2	2	2	2	2	2	2	2
K00341	Energy metabolism	nuoL; NADH-quinone oxidoreductase subunit L [EC:7.1.1.2]	0	0	0	0	0	0	0	0	1	1	0	0	0	1	0	0	1	1	0	1	0	0	0	0	0	0	0	0	0	0	0
K00344	Unclassified: metabolism	qor, CRYZ; NADPH:quinone reductase [EC:1.6.5.5]	1	1	1	2	1	1	1	1	0	0	1	0	1	0	0	0	0	0	0	0	0	0	0	1	0	0	0	0	0	0	0
K00347	Unclassified: metabolism	nqrB; Na+-transporting NADH:ubiquinone oxidoreductase subunit B [EC:7.2.1.1]	1	1	1	1	1	1	2	1	1	1	1	1	1	1	1	1	1	1	1	1	1	1	1	1	1	1	1	1	1	1	1
K00348	Unclassified: metabolism	nqrC; Na+-transporting NADH:ubiquinone oxidoreductase subunit C [EC:7.2.1.1]	0	0	0	0	0	0	1	0	0	0	0	0	0	0	0	0	0	0	0	0	0	0	0	0	0	0	0	0	0	0	0
K00349	Unclassified: metabolism	nqrD; Na+-transporting NADH:ubiquinone oxidoreductase subunit D [EC:7.2.1.1]	0	0	0	0	0	0	1	0	0	0	0	0	0	0	0	0	0	0	0	0	0	0	0	0	0	0	0	0	0	0	0
K00350	Unclassified: metabolism	nqrE; Na+-transporting NADH:ubiquinone oxidoreductase subunit E [EC:7.2.1.1]	0	0	0	0	0	0	1	0	0	0	0	0	0	0	0	0	0	0	0	0	0	0	0	0	0	0	0	0	0	0	0
K00351	Unclassified: metabolism	nqrF; Na+-transporting NADH:ubiquinone oxidoreductase subunit F [EC:7.2.1.1]	0	0	0	0	0	0	1	0	0	0	0	0	0	0	0	0	0	0	0	0	0	0	0	0	0	0	0	0	0	0	0
K00354	Unclassified: metabolism	E1.6.99.1; NADPH2 dehydrogenase [EC:1.6.99.1]	0	0	0	0	0	0	0	0	0	0	0	0	0	0	0	0	0	0	0	0	0	0	0	1	0	0	0	0	0	0	0
K00363	Energy metabolism	nirD; nitrite reductase (NADH) small subunit [EC:1.7.1.15]	0	0	0	0	0	0	0	0	1	1	0	1	0	1	1	1	1	1	1	1	0	0	0	0	0	0	0	0	0	0	0
K00366	Energy metabolism	nirA; ferredoxin-nitrite reductase [EC:1.7.7.1]	1	1	1	0	1	0	0	0	0	0	0	1	1	0	0	0	0	0	0	0	1	1	1	1	1	1	0	1	3	1	1
K00380	Energy metabolism	cysJ; sulfite reductase (NADPH) flavoprotein alpha-component [EC:1.8.1.2]	0	0	0	0	0	0	0	0	0	1	0	0	0	1	0	0	0	0	0	0	0	0	0	0	0	0	0	0	0	0	0
K00382	Carbohydrate metabolism	DLD, lpd, pdhD; dihydrolipoamide dehydrogenase [EC:1.8.1.4]	1	1	1	1	1	1	1	1	1	1	2	1	1	1	0	2	2	1	0	1	2	1	1	1	1	1	1	1	1	1	1
K00384	Metabolism of other amino acids	trxB, TRR; thioredoxin reductase (NADPH) [EC:1.8.1.9]	0	0	0	0	0	0	0	0	2	2	0	0	0	2	0	1	0	1	1	1	0	0	0	0	0	0	0	0	0	0	0
K00390	Energy metabolism	cysH; phosphoadenosine phosphosulfate reductase [EC:1.8.4.8 1.8.4.10]	1	1	1	1	0	2	0	0	1	1	0	0	1	0	0	0	0	0	0	0	0	0	0	0	0	0	0	0	0	0	0
K00392	Energy metabolism	sir; sulfite reductase (ferredoxin) [EC:1.8.7.1]	0	0	0	0	0	0	0	0	0	0	0	1	0	0	0	0	0	0	0	0	0	0	0	0	0	0	0	0	0	0	0
K00395	Energy metabolism	aprB; adenylylsulfate reductase, subunit B [EC:1.8.99.2]	0	0	1	0	0	0	0	1	0	0	0	0	1	0	0	0	0	0	0	0	1	1	0	0	0	0	0	0	0	0	0
K00436	Unclassified: metabolism	hoxH; NAD-reducing hydrogenase large subunit [EC:1.12.1.2]	2	1	1	2	0	2	1	1	1	1	2	0	1	1	1	1	1	2	1	1	1	1	1	2	1	1	1	1	0	1	0
K00441	Energy metabolism	frhB; coenzyme F420 hydrogenase subunit beta [EC:1.12.98.1]	1	1	1	2	1	1	1	1	1	1	1	0	1	1	0	1	1	1	1	1	1	1	1	1	1	1	1	1	1	1	1
K00441	Energy metabolism	frhB; coenzyme F420 hydrogenase subunit beta [EC:1.12.98.1]	1	1	1	2	1	1	1	1	1	1	1	0	1	1	0	1	1	1	1	1	1	1	1	1	1	1	1	1	1	1	1
K00442	Energy metabolism	frhD; coenzyme F420 hydrogenase subunit delta	1	1	1	1	0	1	0	0	0	0	1	0	1	0	0	0	0	0	0	0	1	1	0	0	0	0	0	0	0	0	0
K00450	Amino acid metabolism	E1.13.11.4; gentisate 1,2-dioxygenase [EC:1.13.11.4]	0	0	0	0	0	0	0	0	1	0	0	0	0	0	0	0	0	0	0	0	1	0	0	0	0	0	0	0	0	0	0
K00523	Carbohydrate metabolism	ascD, ddhD, rfbI; CDP-4-dehydro-6-deoxyglucose reductase, E3 [EC:1.17.1.1]	0	0	0	0	0	0	0	0	0	0	0	0	0	0	0	0	0	0	0	0	1	1	1	0	0	0	0	0	0	0	0
K00525	Nucleotide metabolism	E1.17.4.1A, nrdA, nrdE; ribonucleoside-diphosphate reductase alpha chain [EC:1.17.4.1]	2	3	3	3	3	2	2	2	2	2	3	1	1	2	2	2	2	3	1	2	2	2	2	3	2	2	2	2	2	2	2
K00528	Unclassified: metabolism	fpr; ferredoxin/flavodoxin---NADP+ reductase [EC:1.18.1.2 1.19.1.1]	1	1	3	1	1	2	2	2	3	3	3	0	2	3	1	3	3	3	2	3	2	2	3	2	3	2	2	3	3	4	3
K00528	Unclassified: metabolism	fpr; ferredoxin/flavodoxin---NADP+ reductase [EC:1.18.1.2 1.19.1.1]	1	1	3	1	1	2	2	2	3	3	3	0	2	3	1	3	3	3	2	3	2	2	3	2	3	2	2	3	3	4	3
K00533	Unclassified: metabolism	E1.12.7.2L; ferredoxin hydrogenase large subunit [EC:1.12.7.2]	0	0	0	0	0	0	0	0	1	1	0	0	0	1	0	1	1	1	0	1	0	0	0	0	0	0	0	0	0	0	0
K00544	Amino acid metabolism	BHMT; betaine-homocysteine S-methyltransferase [EC:2.1.1.5]	1	0	0	1	0	0	0	1	0	0	0	0	0	0	0	0	2	0	0	0	0	0	0	0	0	0	0	0	0	0	0
K00544	Amino acid metabolism	BHMT; betaine-homocysteine S-methyltransferase [EC:2.1.1.5]	1	0	0	1	0	0	0	1	0	0	0	0	0	0	0	0	2	0	0	0	0	0	0	0	0	0	0	0	0	0	0
K00547	Amino acid metabolism	mmuM, BHMT2; homocysteine S-methyltransferase [EC:2.1.1.10]	1	1	3	2	1	1	1	1	0	0	1	0	1	0	0	0	0	0	0	0	1	1	0	0	0	0	0	0	0	0	0
K00548	Amino acid metabolism	metH, MTR; 5-methyltetrahydrofolate--homocysteine methyltransferase [EC:2.1.1.13]	4	4	6	5	4	4	4	4	4	4	4	1	3	4	3	5	6	4	2	4	4	4	4	4	4	4	2	4	3	4	4
K00548	Amino acid metabolism	metH, MTR; 5-methyltetrahydrofolate--homocysteine methyltransferase [EC:2.1.1.13]	4	4	6	5	4	4	4	4	4	4	4	1	3	4	3	5	6	4	2	4	4	4	4	4	4	4	2	4	3	4	4
K00554	Protein families: genetic information processing	trmD; tRNA (guanine37-N1)-methyltransferase [EC:2.1.1.228]	2	2	2	2	2	2	2	2	2	2	2	0	2	2	2	2	2	2	1	2	2	2	2	2	2	2	2	2	1	2	3
K00558	Amino acid metabolism	DNMT1, dcm; DNA (cytosine-5)-methyltransferase 1 [EC:2.1.1.37]	0	0	0	0	0	0	0	0	0	0	0	0	0	0	0	0	0	0	0	0	0	0	1	0	0	0	0	0	0	1	0
K00560	Nucleotide metabolism	thyA, TYMS; thymidylate synthase [EC:2.1.1.45]	1	1	1	1	0	1	1	1	1	1	1	0	1	1	1	1	1	1	1	1	1	1	1	1	1	1	2	1	2	1	1
K00561	Protein families: genetic information processing	ermC, ermA; 23S rRNA (adenine-N6)-dimethyltransferase [EC:2.1.1.184]	0	0	0	0	0	0	0	0	0	0	0	0	0	0	0	0	0	0	0	0	0	0	0	1	0	0	0	0	0	0	0
K00566	Folding, sorting and degradation	mnmA, trmU; tRNA-uridine 2-sulfurtransferase [EC:2.8.1.13]	1	1	1	2	1	1	1	3	3	2	1	0	1	2	2	3	2	2	1	2	2	2	2	3	2	2	1	2	1	3	2
K00567	Protein families: genetic information processing	ogt, MGMT; methylated-DNA-[protein]-cysteine S-methyltransferase [EC:2.1.1.63]	1	1	1	1	1	1	1	2	1	1	1	0	1	1	1	1	1	2	1	1	1	1	2	1	2	1	0	2	2	2	2
K00568	Metabolism of cofactors and vitamins	ubiG; 2-polyprenyl-6-hydroxyphenyl methylase / 3-demethylubiquinone-9 3-methyltransferase [EC:2.1.1.222 2.1.1.64]	0	0	0	1	0	1	1	1	1	1	0	0	0	1	0	1	1	1	1	1	0	0	0	0	0	0	0	0	0	1	0
K00569	Xenobiotics biodegradation and metabolism	TPMT, tpmT; thiopurine S-methyltransferase [EC:2.1.1.67]	0	1	1	0	0	0	0	0	0	0	0	0	0	0	0	0	0	0	0	0	0	0	0	0	0	0	0	0	0	0	0
K00571	Protein families: signaling and cellular processes	E2.1.1.72; site-specific DNA-methyltransferase (adenine-specific) [EC:2.1.1.72]	1	1	2	1	1	1	1	1	1	1	1	0	3	1	1	1	0	0	0	1	2	1	0	3	0	3	0	1	0	5	0
K00573	Unclassified: metabolism	E2.1.1.77, pcm; protein-L-isoaspartate(D-aspartate) O-methyltransferase [EC:2.1.1.77]	2	2	2	2	2	2	2	2	2	3	2	1	2	1	2	2	2	1	2	2	1	2	2	2	2	2	0	2	2	2	2
K00574	Unclassified: metabolism	cfa; cyclopropane-fatty-acyl-phospholipid synthase [EC:2.1.1.79]	0	0	0	0	0	0	0	1	0	1	0	0	0	0	0	0	0	0	0	0	0	0	1	2	2	0	0	1	1	0	1
K00575	Signal transduction	cheR; chemotaxis protein methyltransferase CheR [EC:2.1.1.80]	2	1	2	1	1	1	1	2	1	1	2	1	2	1	0	1	1	1	1	1	1	1	0	0	0	0	0	0	0	0	0
K00587	Metabolism of terpenoids and polyketides	ICMT, STE14; protein-S-isoprenylcysteine O-methyltransferase [EC:2.1.1.100]	0	0	0	0	0	0	1	0	0	0	0	0	0	1	0	1	1	0	0	0	0	0	0	0	0	0	0	0	0	0	0
K00590	Protein families: signaling and cellular processes	E2.1.1.113; site-specific DNA-methyltransferase (cytosine-N4-specific) [EC:2.1.1.113]	0	1	1	2	0	0	1	2	0	0	0	0	0	0	0	0	1	0	1	0	3	0	0	1	1	0	0	0	0	2	0
K00590	Protein families: signaling and cellular processes	E2.1.1.113; site-specific DNA-methyltransferase (cytosine-N4-specific) [EC:2.1.1.113]	0	1	1	2	0	0	1	2	0	0	0	0	0	0	0	0	1	0	1	0	3	0	0	1	1	0	0	0	0	2	0
K00595	Metabolism of cofactors and vitamins	cobL-cbiET; precorrin-6B C5,15-methyltransferase / cobalt-precorrin-6B C5,C15-methyltransferase [EC:2.1.1.132 2.1.1.289 2.1.1.196]	1	1	0	1	1	2	2	0	0	0	0	0	1	0	0	0	0	0	0	0	1	1	1	1	1	1	0	1	2	2	1
K00600	Carbohydrate metabolism	glyA, SHMT; glycine hydroxymethyltransferase [EC:2.1.2.1]	1	1	1	1	1	1	1	0	1	1	1	0	1	1	2	3	1	1	1	1	1	1	1	1	1	1	1	1	1	1	1
K00602	Nucleotide metabolism	purH; phosphoribosylaminoimidazolecarboxamide formyltransferase / IMP cyclohydrolase [EC:2.1.2.3 3.5.4.10]	1	1	1	1	1	1	1	2	1	1	2	2	1	1	1	1	1	1	1	1	1	1	1	1	1	1	1	1	1	1	1
K00603	Amino acid metabolism	fctD; glutamate formiminotransferase / 5-formyltetrahydrofolate cyclo-ligase [EC:2.1.2.5 6.3.3.2]	1	1	1	1	1	1	1	1	1	1	1	2	1	0	2	1	1	1	1	1	1	1	1	1	1	1	0	1	1	1	1
K00604	Metabolism of cofactors and vitamins	MTFMT, fmt; methionyl-tRNA formyltransferase [EC:2.1.2.9]	1	1	1	1	1	1	1	1	1	1	1	1	1	1	2	1	1	1	1	1	1	1	1	1	1	1	1	1	1	2	1
K00605	Carbohydrate metabolism	gcvT, AMT; aminomethyltransferase [EC:2.1.2.10]	0	0	0	0	0	0	0	0	2	3	0	1	0	2	1	3	3	2	0	2	2	1	1	0	1	1	1	1	1	1	1
K00605	Carbohydrate metabolism	gcvT, AMT; aminomethyltransferase [EC:2.1.2.10]	0	0	0	0	0	0	0	0	2	3	0	1	0	2	1	3	3	2	0	2	2	1	1	0	1	1	1	1	1	1	1
K00608	Nucleotide metabolism	pyrBI; aspartate carbamoyltransferase [EC:2.1.3.2]	1	1	2	3	1	1	1	1	1	1	1	1	1	1	1	1	1	1	1	1	1	1	1	1	1	1	0	1	1	1	1
K00609	Nucleotide metabolism	pyrB, PYR2; aspartate carbamoyltransferase catalytic subunit [EC:2.1.3.2]	1	1	2	3	1	1	1	1	1	1	1	1	1	1	1	1	1	1	1	1	1	1	1	1	1	1	0	1	1	1	1
K00611	Amino acid metabolism	OTC, argF, argI; ornithine carbamoyltransferase [EC:2.1.3.3]	1	1	1	1	1	1	1	1	1	1	1	0	1	1	1	1	1	1	1	1	1	1	1	1	1	1	1	1	1	1	1
K00612	Unclassified: metabolism	nodU; carbamoyltransferase [EC:2.1.3.-]	0	0	0	1	0	0	0	0	0	0	0	0	0	0	0	0	0	0	0	0	0	0	0	0	0	0	0	0	0	0	0
K00615	Carbohydrate metabolism	E2.2.1.1, tktA, tktB; transketolase [EC:2.2.1.1]	3	4	5	9	3	2	5	3	1	1	3	1	2	5	2	1	4	1	1	1	5	5	1	2	1	1	1	2	1	2	1
K00616	Carbohydrate metabolism	E2.2.1.2, talA, talB; transaldolase [EC:2.2.1.2]	3	3	4	2	2	3	3	3	2	2	3	1	1	3	0	0	2	1	0	2	3	3	2	1	2	1	1	2	1	2	2
K00616	Carbohydrate metabolism	E2.2.1.2, talA, talB; transaldolase [EC:2.2.1.2]	3	3	4	2	2	3	3	3	2	2	3	1	1	3	0	0	2	1	0	2	3	3	2	1	2	1	1	2	1	2	2
K00619	Amino acid metabolism	argA; amino-acid N-acetyltransferase [EC:2.3.1.1]	0	0	0	1	0	0	1	1	0	0	0	0	0	0	0	0	0	0	0	0	0	0	1	1	1	1	1	1	1	1	1
K00620	Amino acid metabolism	argJ; glutamate N-acetyltransferase / amino-acid N-acetyltransferase [EC:2.3.1.35 2.3.1.1]	1	1	1	1	1	1	1	1	1	1	1	1	1	1	1	1	1	1	1	1	1	1	1	1	1	1	0	1	0	3	1
K00625	Carbohydrate metabolism	pta; phosphate acetyltransferase [EC:2.3.1.8]	1	1	1	1	1	1	1	1	1	1	1	1	1	1	1	1	0	1	1	1	1	1	1	1	1	1	1	1	1	1	1
K00627	Carbohydrate metabolism	DLAT, aceF, pdhC; pyruvate dehydrogenase E2 component (dihydrolipoamide acetyltransferase) [EC:2.3.1.12]	1	1	1	1	1	1	2	3	1	1	2	1	1	2	1	1	1	1	2	1	2	2	2	1	2	3	1	2	2	2	2
K00627	Carbohydrate metabolism	DLAT, aceF, pdhC; pyruvate dehydrogenase E2 component (dihydrolipoamide acetyltransferase) [EC:2.3.1.12]	1	1	1	1	1	1	2	3	1	1	2	1	1	2	1	1	1	1	2	1	2	2	2	1	2	3	1	2	2	2	2
K00634	Carbohydrate metabolism	ptb; phosphate butyryltransferase [EC:2.3.1.19]	0	0	0	0	0	0	0	0	1	1	0	0	0	0	0	1	0	0	0	1	0	0	0	0	0	0	0	0	0	0	0
K00640	Energy metabolism	cysE; serine O-acetyltransferase [EC:2.3.1.30]	1	1	1	3	1	1	1	1	1	1	1	1	1	1	1	1	1	1	0	1	1	1	1	1	1	1	0	1	1	1	1
K00645	Lipid metabolism	fabD, MCAT, MCT1; [acyl-carrier-protein] S-malonyltransferase [EC:2.3.1.39]	1	1	1	1	1	1	1	1	1	1	2	1	1	1	1	1	1	1	1	1	1	1	1	1	1	1	1	1	1	1	1
K00648	Lipid metabolism	fabH; 3-oxoacyl-[acyl-carrier-protein] synthase III [EC:2.3.1.180]	1	1	1	1	1	1	1	1	1	1	1	1	1	1	1	1	1	0	1	1	1	1	1	1	1	1	0	1	1	1	1
K00655	Lipid metabolism	plsC; 1-acyl-sn-glycerol-3-phosphate acyltransferase [EC:2.3.1.51]	2	2	2	2	1	1	2	2	1	1	1	2	2	1	1	1	2	1	0	1	2	2	1	2	2	2	1	2	2	2	2
K00656	Carbohydrate metabolism	E2.3.1.54, pflD; formate C-acetyltransferase [EC:2.3.1.54]	1	0	0	0	0	0	1	1	1	1	0	0	0	3	0	0	1	0	0	1	1	1	0	1	0	1	1	0	0	0	0
K00657	Amino acid metabolism	speG, SAT; diamine N-acetyltransferase [EC:2.3.1.57]	0	0	0	0	0	0	0	0	1	0	0	0	0	0	0	1	1	1	0	0	0	0	1	1	1	1	0	1	0	0	1
K00658	Carbohydrate metabolism	DLST, sucB; 2-oxoglutarate dehydrogenase E2 component (dihydrolipoamide succinyltransferase) [EC:2.3.1.61]	0	0	0	0	0	0	0	0	0	0	0	0	0	0	0	0	0	0	0	0	0	0	0	0	0	1	0	0	0	0	0
K00661	Unclassified: metabolism	maa; maltose O-acetyltransferase [EC:2.3.1.79]	0	0	0	0	0	0	0	0	0	0	0	0	0	0	0	0	0	0	0	0	0	0	0	0	0	0	1	0	0	0	0
K00666	Protein families: metabolism	K00666; fatty-acyl-CoA synthase [EC:6.2.1.-]	0	0	0	0	0	0	0	0	0	0	0	0	0	0	0	0	0	0	0	0	0	0	1	2	2	1	0	1	0	1	3
K00677	Glycan biosynthesis and metabolism	lpxA; UDP-N-acetylglucosamine acyltransferase [EC:2.3.1.129]	1	1	1	1	1	1	1	1	1	1	1	0	1	1	2	1	1	1	1	1	1	1	1	1	1	1	1	1	1	1	1
K00682	Metabolism of other amino acids	GGCT; gamma-glutamylcyclotransferase [EC:4.3.2.9]	0	0	0	0	0	0	0	0	0	0	0	0	0	0	0	0	0	0	0	0	0	0	0	0	1	0	0	0	0	0	0
K00683	Protein families: metabolism	QPCT; glutaminyl-peptide cyclotransferase [EC:2.3.2.5]	0	0	0	0	1	0	1	1	1	1	0	0	0	1	1	0	1	0	1	1	0	1	1	1	1	1	1	1	0	0	1
K00688	Carbohydrate metabolism	PYG, glgP; glycogen phosphorylase [EC:2.4.1.1]	1	1	1	1	1	1	1	1	1	1	1	1	1	1	1	1	1	1	1	1	1	1	1	1	1	1	1	1	1	1	1
K00690	Carbohydrate metabolism	E2.4.1.7; sucrose phosphorylase [EC:2.4.1.7]	1	1	1	1	1	0	0	0	0	0	0	0	0	0	0	0	0	0	0	0	0	0	0	0	0	0	0	0	0	0	0
K00692	Carbohydrate metabolism	sacB; levansucrase [EC:2.4.1.10]	0	0	0	0	0	0	0	0	0	0	0	0	0	0	0	0	0	0	0	0	0	0	0	0	0	1	0	0	0	0	0
K00694	Carbohydrate metabolism	bcsA; cellulose synthase (UDP-forming) [EC:2.4.1.12]	0	0	0	0	0	0	0	1	0	0	0	0	0	0	0	0	0	0	0	0	0	0	0	0	0	0	0	0	0	0	0
K00696	Carbohydrate metabolism	E2.4.1.14; sucrose-phosphate synthase [EC:2.4.1.14]	0	0	0	0	0	0	0	0	0	0	0	0	0	0	0	0	0	0	0	0	1	1	0	0	0	0	0	0	0	0	0
K00697	Carbohydrate metabolism	otsA; trehalose 6-phosphate synthase [EC:2.4.1.15 2.4.1.347]	0	0	1	0	0	0	0	0	0	0	0	0	0	0	0	0	0	0	0	0	0	0	1	2	1	1	0	1	1	1	1
K00700	Carbohydrate metabolism	GBE1, glgB; 1,4-alpha-glucan branching enzyme [EC:2.4.1.18]	2	3	3	2	2	2	3	3	4	4	2	2	3	3	2	4	3	3	3	4	3	3	2	3	2	2	1	2	3	2	2
K00702	Carbohydrate metabolism	E2.4.1.20; cellobiose phosphorylase [EC:2.4.1.20]	0	0	0	0	0	0	1	2	1	1	0	0	0	1	1	2	1	2	0	1	0	0	1	1	1	1	0	1	2	1	1
K00703	Carbohydrate metabolism	glgA; starch synthase [EC:2.4.1.21]	1	1	1	2	1	1	1	1	1	1	1	1	1	1	1	1	1	1	0	1	1	1	1	1	1	1	2	1	1	2	1
K00705	Carbohydrate metabolism	malQ; 4-alpha-glucanotransferase [EC:2.4.1.25]	1	1	2	1	1	1	1	1	1	1	1	1	2	1	0	1	1	1	1	1	1	1	1	1	1	1	0	1	1	1	1
K00705	Carbohydrate metabolism	malQ; 4-alpha-glucanotransferase [EC:2.4.1.25]	1	1	2	1	1	1	1	1	1	1	1	1	2	1	0	1	1	1	1	1	1	1	1	1	1	1	0	1	1	1	1
K00712	Protein families: metabolism	tagE; poly(glycerol-phosphate) alpha-glucosyltransferase [EC:2.4.1.52]	0	0	0	0	0	0	0	0	0	0	1	0	0	0	0	0	0	0	0	0	0	1	0	0	0	0	0	0	0	0	0
K00713	Glycan biosynthesis and metabolism	waaD; UDP-glucose:(glucosyl)LPS alpha-1,2-glucosyltransferase [EC:2.4.1.-]	0	0	0	0	0	0	0	0	0	0	0	0	0	0	0	0	0	0	0	0	0	0	0	0	0	1	0	0	0	0	0
K00728	Glycan biosynthesis and metabolism	POMT, pmt; dolichyl-phosphate-mannose-protein mannosyltransferase [EC:2.4.1.109]	2	2	1	2	2	2	2	2	2	2	2	1	3	1	0	3	4	3	0	2	0	0	2	1	3	1	0	1	0	0	2
K00745	#N/A	#N/A	0	0	0	0	0	0	0	0	0	0	0	0	0	0	0	0	0	0	0	0	0	0	0	0	0	0	0	0	0	1	0
K00748	Glycan biosynthesis and metabolism	lpxB; lipid-A-disaccharide synthase [EC:2.4.1.182]	3	3	3	3	3	3	3	3	2	2	4	3	3	2	5	2	2	2	3	2	3	3	3	3	3	3	3	3	3	3	3
K00754	Unclassified: metabolism	bshA; L-malate glycosyltransferase [EC:2.4.1.-]	1	1	0	5	0	0	1	1	0	0	0	0	0	0	0	0	0	0	1	0	0	0	0	2	0	0	0	0	0	1	0
K00757	Nucleotide metabolism	udp, UPP; uridine phosphorylase [EC:2.4.2.3]	1	1	1	1	1	1	1	1	1	1	1	1	1	1	1	1	1	1	1	1	1	1	0	0	1	1	1	1	0	1	1
K00758	Nucleotide metabolism	deoA, TYMP; thymidine phosphorylase [EC:2.4.2.4]	0	0	0	0	0	0	0	0	0	0	0	0	0	0	0	0	1	0	0	0	0	0	0	0	0	0	0	0	0	0	0
K00759	Nucleotide metabolism	APRT, apt; adenine phosphoribosyltransferase [EC:2.4.2.7]	1	2	1	2	2	1	2	1	1	1	1	1	1	2	1	1	2	3	1	1	1	1	1	1	1	1	1	1	1	1	1
K00760	Nucleotide metabolism	hprT, hpt, HPRT1; hypoxanthine phosphoribosyltransferase [EC:2.4.2.8]	3	3	4	2	3	3	3	3	3	3	3	3	3	3	4	3	3	3	2	3	3	3	3	3	3	3	4	3	3	3	3
K00761	Nucleotide metabolism	upp, UPRT; uracil phosphoribosyltransferase [EC:2.4.2.9]	1	2	2	1	1	0	1	1	0	0	0	1	1	0	1	0	1	0	1	0	1	1	1	1	1	1	2	1	1	0	2
K00762	Nucleotide metabolism	pyrE; orotate phosphoribosyltransferase [EC:2.4.2.10]	1	1	1	1	1	1	1	1	1	1	1	0	1	1	1	1	1	1	1	1	1	1	1	1	1	1	0	1	1	1	1
K00763	Metabolism of cofactors and vitamins	pncB, NAPRT1; nicotinate phosphoribosyltransferase [EC:6.3.4.21]	1	1	1	0	1	1	1	2	1	1	1	1	1	1	0	1	0	1	1	1	1	1	1	1	1	1	0	1	1	1	1
K00764	Nucleotide metabolism	purF, PPAT; amidophosphoribosyltransferase [EC:2.4.2.14]	1	2	1	1	2	1	2	1	1	1	1	1	1	1	1	1	2	1	1	1	1	1	1	2	1	1	1	1	2	2	1
K00765	Amino acid metabolism	hisG; ATP phosphoribosyltransferase [EC:2.4.2.17]	2	2	2	2	2	1	1	0	1	1	1	0	1	2	1	1	1	1	0	1	2	2	0	2	2	2	0	3	0	1	1
K00766	Amino acid metabolism	trpD; anthranilate phosphoribosyltransferase [EC:2.4.2.18]	1	1	1	1	1	2	1	1	2	2	1	0	1	1	1	2	2	2	2	2	1	1	1	2	1	1	0	0	1	1	1
K00767	Metabolism of cofactors and vitamins	nadC, QPRT; nicotinate-nucleotide pyrophosphorylase (carboxylating) [EC:2.4.2.19]	1	1	1	1	1	1	1	1	1	1	1	1	1	1	1	1	1	1	0	1	1	1	1	1	1	1	0	1	1	1	1
K00768	Metabolism of cofactors and vitamins	E2.4.2.21, cobU, cobT; nicotinate-nucleotide--dimethylbenzimidazole phosphoribosyltransferase [EC:2.4.2.21]	2	2	2	1	1	1	3	2	1	1	1	1	2	1	1	1	0	1	2	1	2	2	3	3	2	2	2	2	2	2	2
K00768	Metabolism of cofactors and vitamins	E2.4.2.21, cobU, cobT; nicotinate-nucleotide--dimethylbenzimidazole phosphoribosyltransferase [EC:2.4.2.21]	2	2	2	1	1	1	3	2	1	1	1	1	2	1	1	1	0	1	2	1	2	2	3	3	2	2	2	2	2	2	2
K00773	Protein families: genetic information processing	tgt; queuine tRNA-ribosyltransferase [EC:2.4.2.29]	1	1	1	1	1	1	1	1	1	1	2	0	1	1	1	1	1	1	0	1	1	1	1	1	1	1	0	1	1	1	1
K00786	Protein families: metabolism	GALT29A; beta-1,6-galactosyltransferase [EC:2.4.1.-]	1	1	1	1	2	1	2	2	1	1	1	1	1	1	1	1	2	1	1	1	0	0	1	1	1	1	2	1	1	1	1
K00788	Metabolism of cofactors and vitamins	thiE; thiamine-phosphate pyrophosphorylase [EC:2.5.1.3]	1	1	1	1	1	1	1	1	1	1	1	0	1	1	1	2	1	1	1	1	1	1	1	1	1	1	1	1	1	1	1
K00789	Amino acid metabolism	metK, MAT; S-adenosylmethionine synthetase [EC:2.5.1.6]	1	1	1	1	1	1	1	1	1	1	1	1	1	1	1	1	1	1	0	1	1	1	1	2	1	1	1	1	1	1	1
K00790	Carbohydrate metabolism	murA; UDP-N-acetylglucosamine 1-carboxyvinyltransferase [EC:2.5.1.7]	1	1	1	1	1	1	1	1	1	1	1	2	1	1	1	1	1	1	1	1	1	1	1	1	1	1	1	1	1	1	1
K00791	Metabolism of terpenoids and polyketides	miaA, TRIT1; tRNA dimethylallyltransferase [EC:2.5.1.75]	1	1	2	1	1	1	1	1	1	1	1	1	1	1	1	1	1	1	1	1	1	1	1	1	1	1	0	1	1	1	1
K00795	Metabolism of terpenoids and polyketides	ispA; farnesyl diphosphate synthase [EC:2.5.1.1 2.5.1.10]	1	1	1	1	1	1	1	1	1	1	1	1	1	1	1	1	1	1	0	1	0	0	1	1	1	1	0	1	1	1	1
K00797	Amino acid metabolism	speE, SRM, SPE3; spermidine synthase [EC:2.5.1.16]	2	2	2	2	2	2	3	3	2	2	2	1	2	2	1	2	1	2	1	2	2	2	2	2	2	2	2	2	2	2	1
K00798	Metabolism of cofactors and vitamins	MMAB, pduO; cob(I)alamin adenosyltransferase [EC:2.5.1.17]	0	0	0	0	0	0	0	0	0	0	0	0	0	0	0	0	0	0	0	0	0	0	0	0	0	0	0	0	0	1	0
K00800	Amino acid metabolism	aroA; 3-phosphoshikimate 1-carboxyvinyltransferase [EC:2.5.1.19]	2	2	2	2	2	2	2	2	3	3	2	2	2	3	2	3	3	3	1	3	3	2	2	3	2	3	2	2	2	2	3
K00800	Amino acid metabolism	aroA; 3-phosphoshikimate 1-carboxyvinyltransferase [EC:2.5.1.19]	2	2	2	2	2	2	2	2	3	3	2	2	2	3	2	3	3	3	1	3	3	2	2	3	2	3	2	2	2	2	3
K00803	Lipid metabolism	AGPS, agpS; alkyldihydroxyacetonephosphate synthase [EC:2.5.1.26]	0	0	0	0	0	0	0	0	0	0	0	0	0	0	0	0	0	0	0	0	0	0	1	2	2	2	0	1	2	1	2
K00805	Metabolism of terpenoids and polyketides	hepS; heptaprenyl diphosphate synthase component 1 [EC:2.5.1.30]	1	1	1	1	1	1	1	1	1	2	1	0	1	1	1	0	2	1	1	1	2	2	1	2	1	2	0	2	1	1	1
K00806	Glycan biosynthesis and metabolism	uppS; undecaprenyl diphosphate synthase [EC:2.5.1.31]	1	1	1	1	1	1	1	1	1	1	1	1	1	1	1	1	1	1	1	1	1	1	1	2	1	1	1	1	1	1	1
K00812	Amino acid metabolism	aspB; aspartate aminotransferase [EC:2.6.1.1]	3	3	3	2	3	3	3	5	3	3	4	3	2	3	2	2	4	3	2	3	3	3	3	2	3	3	1	3	3	4	3
K00817	Amino acid metabolism	hisC; histidinol-phosphate aminotransferase [EC:2.6.1.9]	4	4	3	4	3	2	2	3	2	2	3	1	3	2	3	3	3	3	1	2	3	3	3	3	3	3	2	3	2	3	3
K00817	Amino acid metabolism	hisC; histidinol-phosphate aminotransferase [EC:2.6.1.9]	4	4	3	4	3	2	2	3	2	2	3	1	3	2	3	3	3	3	1	2	3	3	3	3	3	3	2	3	2	3	3
K00820	Carbohydrate metabolism	glmS, GFPT; glutamine---fructose-6-phosphate transaminase (isomerizing) [EC:2.6.1.16]	2	2	2	3	2	3	3	2	1	1	3	1	2	1	1	0	1	0	1	1	2	3	1	3	1	2	0	1	1	1	1
K00821	Amino acid metabolism	argD; acetylornithine/N-succinyldiaminopimelate aminotransferase [EC:2.6.1.11 2.6.1.17]	2	2	2	2	2	2	1	2	2	2	3	2	2	2	2	2	2	2	2	2	2	2	2	3	2	2	1	2	2	3	2
K00823	Carbohydrate metabolism	puuE; 4-aminobutyrate aminotransferase [EC:2.6.1.19]	0	0	0	0	0	0	1	0	0	0	0	0	0	0	0	0	0	0	0	0	0	0	0	0	0	0	0	0	0	0	0
K00826	Amino acid metabolism	E2.6.1.42, ilvE; branched-chain amino acid aminotransferase [EC:2.6.1.42]	1	1	2	1	1	1	1	1	2	2	1	0	1	3	1	1	2	2	1	2	1	1	1	1	1	1	0	1	1	1	1
K00830	Carbohydrate metabolism	AGXT; alanine-glyoxylate transaminase / serine-glyoxylate transaminase / serine-pyruvate transaminase [EC:2.6.1.44 2.6.1.45 2.6.1.51]	0	0	0	0	0	0	1	0	0	0	0	0	0	0	0	0	0	0	0	0	0	0	0	0	0	1	0	0	0	0	0
K00830	Carbohydrate metabolism	AGXT; alanine-glyoxylate transaminase / serine-glyoxylate transaminase / serine-pyruvate transaminase [EC:2.6.1.44 2.6.1.45 2.6.1.51]	0	0	0	0	0	0	1	0	0	0	0	0	0	0	0	0	0	0	0	0	0	0	0	0	0	1	0	0	0	0	0
K00831	Energy metabolism	serC, PSAT1; phosphoserine aminotransferase [EC:2.6.1.52]	1	1	1	2	1	1	1	1	0	1	1	0	1	1	0	1	0	1	0	1	1	1	0	0	0	0	0	0	0	0	0
K00833	Metabolism of cofactors and vitamins	bioA; adenosylmethionine---8-amino-7-oxononanoate aminotransferase [EC:2.6.1.62]	1	1	1	0	0	0	0	0	0	0	0	0	1	0	0	0	0	0	0	0	0	0	0	0	0	0	0	0	0	0	0
K00845	Carbohydrate metabolism	glk; glucokinase [EC:2.7.1.2]	2	1	1	1	1	2	4	2	2	3	2	0	0	2	2	3	2	2	0	2	2	3	2	4	2	2	3	2	3	2	2
K00847	Carbohydrate metabolism	E2.7.1.4, scrK; fructokinase [EC:2.7.1.4]	2	2	3	3	2	2	4	3	2	2	4	2	3	2	2	3	3	2	2	2	3	3	2	2	2	3	1	2	2	3	2
K00848	Carbohydrate metabolism	rhaB; rhamnulokinase [EC:2.7.1.5]	6	6	4	8	4	5	8	7	6	6	7	4	7	5	4	7	7	5	5	6	7	5	4	6	5	6	5	6	4	4	5
K00850	Carbohydrate metabolism	pfkA, PFK; 6-phosphofructokinase 1 [EC:2.7.1.11]	2	3	2	2	2	2	2	2	2	2	2	1	2	2	1	2	3	2	0	2	2	2	2	4	2	2	2	2	2	2	2
K00851	Carbohydrate metabolism	idnK, gntK; gluconokinase [EC:2.7.1.12]	6	7	6	9	4	7	10	9	6	7	7	7	8	5	3	6	6	4	6	7	7	7	8	8	8	7	4	8	7	6	6
K00851	Carbohydrate metabolism	idnK, gntK; gluconokinase [EC:2.7.1.12]	6	7	6	9	4	7	10	9	6	7	7	7	8	5	3	6	6	4	6	7	7	7	8	8	8	7	4	8	7	6	6
K00852	Carbohydrate metabolism	rbsK, RBKS; ribokinase [EC:2.7.1.15]	5	6	5	5	5	4	5	5	5	5	4	1	5	3	2	3	2	3	3	4	5	5	6	6	6	7	4	4	6	7	7
K00852	Carbohydrate metabolism	rbsK, RBKS; ribokinase [EC:2.7.1.15]	5	6	5	5	5	4	5	5	5	5	4	1	5	3	2	3	2	3	3	4	5	5	6	6	6	7	4	4	6	7	7
K00854	Carbohydrate metabolism	xylB, XYLB; xylulokinase [EC:2.7.1.17]	12	16	15	16	14	15	21	17	13	15	14	13	16	12	10	13	14	11	10	14	16	16	18	18	21	18	12	18	17	18	18
K00854	Carbohydrate metabolism	xylB, XYLB; xylulokinase [EC:2.7.1.17]	12	16	15	16	14	15	21	17	13	15	14	13	16	12	10	13	14	11	10	14	16	16	18	18	21	18	12	18	17	18	18
K00856	Nucleotide metabolism	ADK, adoK; adenosine kinase [EC:2.7.1.20]	0	0	0	0	0	0	0	0	2	2	0	0	0	1	0	0	0	0	0	2	0	0	0	0	0	0	0	0	0	0	0
K00858	Metabolism of cofactors and vitamins	ppnK, NADK; NAD+ kinase [EC:2.7.1.23]	1	1	1	2	1	1	1	1	1	1	1	1	1	1	1	1	1	1	0	1	1	1	1	1	1	1	2	1	1	1	1
K00859	Metabolism of cofactors and vitamins	coaE; dephospho-CoA kinase [EC:2.7.1.24]	1	1	1	1	1	1	1	1	1	1	1	1	1	1	1	1	1	1	0	1	1	1	1	1	1	1	1	1	1	1	1
K00860	Energy metabolism	cysC; adenylylsulfate kinase [EC:2.7.1.25]	0	0	0	0	0	0	0	0	0	0	0	0	0	0	0	0	0	0	0	0	1	1	0	1	0	0	0	0	0	0	0
K00862	Unclassified: metabolism	eryA; erythritol kinase (D-erythritol 1-phosphate-forming) [EC:2.7.1.215]	3	5	4	6	3	5	8	7	4	5	6	4	4	2	3	4	4	3	5	4	6	5	4	3	4	3	3	3	4	3	3
K00863	Carbohydrate metabolism	DAK, TKFC; triose/dihydroxyacetone kinase / FAD-AMP lyase (cyclizing) [EC:2.7.1.28 2.7.1.29 4.6.1.15]	1	1	3	1	4	0	1	2	1	2	2	1	2	1	0	1	1	0	0	1	2	2	1	1	1	1	1	1	1	1	1
K00864	Lipid metabolism	glpK, GK; glycerol kinase [EC:2.7.1.30]	1	1	1	2	1	0	4	1	2	2	1	1	2	2	3	2	3	3	0	2	2	2	1	1	1	1	1	1	1	1	2
K00864	Lipid metabolism	glpK, GK; glycerol kinase [EC:2.7.1.30]	1	1	1	2	1	0	4	1	2	2	1	1	2	2	3	2	3	3	0	2	2	2	1	1	1	1	1	1	1	1	2
K00865	Carbohydrate metabolism	glxK, garK; glycerate 2-kinase [EC:2.7.1.165]	2	2	4	3	2	2	1	1	1	1	2	1	2	1	1	1	1	1	1	1	1	1	1	0	1	1	1	1	1	0	1
K00868	Metabolism of cofactors and vitamins	pdxK, pdxY; pyridoxine kinase [EC:2.7.1.35]	1	1	1	1	1	0	1	0	1	1	1	0	1	1	1	2	1	1	1	1	0	0	1	0	1	0	0	1	1	1	1
K00872	Amino acid metabolism	thrB; homoserine kinase [EC:2.7.1.39]	1	1	1	2	1	1	1	1	1	1	1	0	0	1	1	1	1	1	0	1	1	1	1	1	1	1	1	1	1	1	1
K00873	Carbohydrate metabolism	PK, pyk; pyruvate kinase [EC:2.7.1.40]	1	1	1	2	1	1	1	1	0	0	1	0	1	0	0	0	0	0	0	0	1	1	1	1	1	1	1	1	1	1	1
K00874	Carbohydrate metabolism	kdgK; 2-dehydro-3-deoxygluconokinase [EC:2.7.1.45]	0	1	1	1	1	0	0	0	1	1	0	1	1	1	1	0	1	0	2	1	0	0	0	0	0	0	0	0	0	0	0
K00876	Nucleotide metabolism	udk, UCK; uridine kinase [EC:2.7.1.48]	1	1	1	1	1	1	1	0	1	1	1	1	1	1	1	1	1	1	0	1	2	1	1	3	1	1	1	0	0	1	1
K00878	Metabolism of cofactors and vitamins	thiM; hydroxyethylthiazole kinase [EC:2.7.1.50]	1	1	1	1	1	1	1	1	1	1	1	0	1	1	1	2	2	1	1	1	1	1	1	1	1	1	1	1	1	1	1
K00879	Carbohydrate metabolism	fucK; L-fuculokinase [EC:2.7.1.51]	1	1	1	1	1	1	1	1	2	2	1	0	1	2	1	2	2	1	1	2	1	1	1	1	2	2	0	1	1	1	2
K00879	Carbohydrate metabolism	fucK; L-fuculokinase [EC:2.7.1.51]	1	1	1	1	1	1	1	1	2	2	1	0	1	2	1	2	2	1	1	2	1	1	1	1	2	2	0	1	1	1	2
K00880	Carbohydrate metabolism	lyxK; L-xylulokinase [EC:2.7.1.53]	0	0	0	0	0	0	0	1	1	1	0	0	0	1	1	1	1	0	0	1	1	1	1	1	1	0	0	2	1	1	1
K00882	Carbohydrate metabolism	fruK; 1-phosphofructokinase [EC:2.7.1.56]	1	1	1	1	1	1	2	2	2	2	2	1	1	2	1	2	3	2	2	2	1	1	2	2	2	3	1	2	2	2	2
K00884	Carbohydrate metabolism	NAGK, nagK; N-acetylglucosamine kinase [EC:2.7.1.59]	0	0	0	0	0	0	0	2	0	0	0	0	0	0	0	0	0	0	0	0	0	0	0	0	0	0	0	0	0	0	0
K00885	Carbohydrate metabolism	nanK; N-acylmannosamine kinase [EC:2.7.1.60]	0	0	0	0	0	0	0	0	1	1	0	0	0	1	1	2	1	1	0	1	0	0	0	0	0	0	0	0	0	0	0
K00891	Amino acid metabolism	aroK, aroL; shikimate kinase [EC:2.7.1.71]	1	1	1	1	1	1	1	1	1	1	1	1	1	1	1	1	1	1	0	1	1	1	1	1	1	1	0	1	1	1	1
K00891	Amino acid metabolism	aroK, aroL; shikimate kinase [EC:2.7.1.71]	1	1	1	1	1	1	1	1	1	1	1	1	1	1	1	1	1	1	0	1	1	1	1	1	1	1	0	1	1	1	1
K00895	Carbohydrate metabolism	pfp, PFP; diphosphate-dependent phosphofructokinase [EC:2.7.1.90]	1	2	1	1	1	1	1	1	1	1	1	0	1	1	1	1	2	1	0	1	1	1	1	3	1	1	1	1	1	1	1
K00912	Glycan biosynthesis and metabolism	lpxK; tetraacyldisaccharide 4'-kinase [EC:2.7.1.130]	1	0	0	0	1	1	1	0	0	0	0	0	0	0	0	0	0	0	0	0	1	1	0	1	0	1	0	0	0	0	0
K00917	Carbohydrate metabolism	lacC; tagatose 6-phosphate kinase [EC:2.7.1.144]	0	1	1	0	0	1	1	1	2	2	2	0	0	2	0	2	2	2	1	2	0	1	1	1	1	1	1	1	1	1	1
K00918	Carbohydrate metabolism	pfkC; ADP-dependent phosphofructokinase/glucokinase [EC:2.7.1.146 2.7.1.147]	0	0	0	0	0	0	0	0	0	0	0	0	0	0	0	0	0	0	0	0	1	0	0	0	0	0	0	0	0	0	0
K00919	Metabolism of terpenoids and polyketides	ispE; 4-diphosphocytidyl-2-C-methyl-D-erythritol kinase [EC:2.7.1.148]	1	1	1	1	1	1	1	1	1	1	1	1	1	2	1	1	1	1	1	1	1	1	1	1	1	1	1	1	1	1	1
K00925	Carbohydrate metabolism	ackA; acetate kinase [EC:2.7.2.1]	2	2	2	2	2	2	2	2	2	2	2	1	2	2	2	2	2	1	1	2	2	2	1	1	1	2	3	1	1	1	1
K00927	Carbohydrate metabolism	PGK, pgk; phosphoglycerate kinase [EC:2.7.2.3]	2	2	2	1	2	2	2	1	2	2	2	2	2	2	1	2	1	2	2	2	1	1	1	3	1	1	1	1	1	1	1
K00928	Amino acid metabolism	lysC; aspartate kinase [EC:2.7.2.4]	2	2	2	3	1	2	2	2	2	2	2	2	1	2	2	2	2	2	1	2	2	2	2	2	2	2	0	2	2	2	2
K00928	Amino acid metabolism	lysC; aspartate kinase [EC:2.7.2.4]	2	2	2	3	1	2	2	2	2	2	2	2	1	2	2	2	2	2	1	2	2	2	2	2	2	2	0	2	2	2	2
K00930	Amino acid metabolism	argB; acetylglutamate kinase [EC:2.7.2.8]	3	2	2	3	3	2	3	3	3	3	3	1	2	3	2	3	3	3	2	3	2	2	3	4	3	3	1	3	2	6	3
K00930	Amino acid metabolism	argB; acetylglutamate kinase [EC:2.7.2.8]	3	2	2	3	3	2	3	3	3	3	3	1	2	3	2	3	3	3	2	3	2	2	3	4	3	3	1	3	2	6	3
K00931	Amino acid metabolism	proB; glutamate 5-kinase [EC:2.7.2.11]	1	1	1	1	1	1	1	1	1	1	1	0	1	1	1	1	1	1	1	1	1	1	1	1	1	1	1	1	1	1	1
K00933	Amino acid metabolism	E2.7.3.2; creatine kinase [EC:2.7.3.2]	1	1	1	1	1	1	1	1	1	1	1	1	1	1	1	1	1	1	1	1	1	1	1	1	1	1	1	1	1	1	1
K00934	Amino acid metabolism	E2.7.3.3; arginine kinase [EC:2.7.3.3]	1	1	1	1	1	1	1	1	1	1	1	1	1	1	1	1	1	1	1	1	1	1	1	1	1	1	1	1	1	1	1
K00936	Protein families: metabolism	pdtaS; two-component system, sensor histidine kinase PdtaS [EC:2.7.13.3]	0	0	0	0	0	0	0	0	0	0	0	0	0	1	0	1	0	0	0	0	0	0	0	0	0	0	0	0	0	0	0
K00939	Nucleotide metabolism	adk, AK; adenylate kinase [EC:2.7.4.3]	1	1	1	1	1	1	1	2	1	1	1	1	1	1	1	1	1	2	1	1	2	2	1	1	1	1	1	1	1	1	1
K00939	Nucleotide metabolism	adk, AK; adenylate kinase [EC:2.7.4.3]	1	1	1	1	1	1	1	2	1	1	1	1	1	1	1	1	1	2	1	1	2	2	1	1	1	1	1	1	1	1	1
K00940	Nucleotide metabolism	ndk, NME; nucleoside-diphosphate kinase [EC:2.7.4.6]	0	0	1	0	0	0	0	0	0	0	0	0	0	0	0	0	0	0	0	0	0	0	0	0	0	0	0	0	0	2	0
K00941	Metabolism of cofactors and vitamins	thiD; hydroxymethylpyrimidine/phosphomethylpyrimidine kinase [EC:2.7.1.49 2.7.4.7]	1	1	1	1	1	1	1	1	1	1	1	0	1	1	1	3	1	1	1	1	1	1	1	1	1	1	0	1	1	1	1
K00941	Metabolism of cofactors and vitamins	thiD; hydroxymethylpyrimidine/phosphomethylpyrimidine kinase [EC:2.7.1.49 2.7.4.7]	1	1	1	1	1	1	1	1	1	1	1	0	1	1	1	3	1	1	1	1	1	1	1	1	1	1	0	1	1	1	1
K00942	Nucleotide metabolism	gmk, GUK1; guanylate kinase [EC:2.7.4.8]	1	1	1	1	1	1	1	1	1	1	1	0	0	1	1	1	2	1	1	1	1	1	1	1	1	1	1	1	1	1	1
K00943	Nucleotide metabolism	tmk, DTYMK; dTMP kinase [EC:2.7.4.9]	2	2	2	2	2	2	2	3	2	2	1	1	2	2	1	2	2	2	1	2	2	2	2	2	2	2	2	2	2	2	2
K00943	Nucleotide metabolism	tmk, DTYMK; dTMP kinase [EC:2.7.4.9]	2	2	2	2	2	2	2	3	2	2	1	1	2	2	1	2	2	2	1	2	2	2	2	2	2	2	2	2	2	2	2
K00945	Nucleotide metabolism	cmk; CMP/dCMP kinase [EC:2.7.4.25]	3	3	3	3	3	3	2	3	3	3	2	3	3	2	3	3	3	2	1	3	2	2	3	2	4	3	3	4	4	4	4
K00945	Nucleotide metabolism	cmk; CMP/dCMP kinase [EC:2.7.4.25]	3	3	3	3	3	3	2	3	3	3	2	3	3	2	3	3	3	2	1	3	2	2	3	2	4	3	3	4	4	4	4
K00946	Metabolism of cofactors and vitamins	thiL; thiamine-monophosphate kinase [EC:2.7.4.16]	1	1	1	1	1	1	1	2	1	1	1	0	1	1	1	2	1	1	1	1	1	1	1	1	1	1	1	1	1	1	1
K00948	Carbohydrate metabolism	PRPS, prsA; ribose-phosphate pyrophosphokinase [EC:2.7.6.1]	1	1	1	0	1	1	1	1	1	1	1	1	1	1	1	1	1	1	0	1	1	1	1	1	1	1	1	1	1	1	1
K00950	Metabolism of cofactors and vitamins	folK; 2-amino-4-hydroxy-6-hydroxymethyldihydropteridine diphosphokinase [EC:2.7.6.3]	1	1	1	1	1	1	2	1	2	2	1	0	0	2	1	1	2	2	2	2	1	2	2	1	2	2	1	2	2	2	2
K00951	Nucleotide metabolism	relA; GTP pyrophosphokinase [EC:2.7.6.5]	1	2	1	1	1	1	1	2	1	1	1	1	1	1	1	1	2	1	1	1	1	1	1	2	2	1	2	1	1	1	1
K00954	Metabolism of cofactors and vitamins	E2.7.7.3A, coaD, kdtB; pantetheine-phosphate adenylyltransferase [EC:2.7.7.3]	1	1	1	0	1	1	1	1	1	1	1	1	1	1	1	1	0	1	1	1	1	1	1	1	1	1	1	1	1	1	1
K00958	Energy metabolism	sat, met3; sulfate adenylyltransferase [EC:2.7.7.4]	0	0	0	0	0	0	0	0	0	0	0	0	0	0	0	0	0	0	0	0	0	0	0	0	0	1	1	0	0	0	0
K00962	Folding, sorting and degradation	pnp, PNPT1; polyribonucleotide nucleotidyltransferase [EC:2.7.7.8]	1	1	1	1	1	1	1	1	1	1	1	1	1	1	2	1	1	1	0	1	1	1	1	1	1	1	2	1	1	1	1
K00963	Carbohydrate metabolism	UGP2, galU, galF; UTP--glucose-1-phosphate uridylyltransferase [EC:2.7.7.9]	1	1	1	1	1	1	1	1	1	1	1	1	1	1	0	1	1	1	0	1	1	1	1	1	2	1	0	1	1	1	1
K00965	Carbohydrate metabolism	galT, GALT; UDPglucose--hexose-1-phosphate uridylyltransferase [EC:2.7.7.12]	1	2	1	1	1	1	1	1	1	1	2	0	1	1	0	1	1	1	1	1	0	0	1	1	1	1	1	1	1	1	1
K00969	Metabolism of cofactors and vitamins	nadD; nicotinate-nucleotide adenylyltransferase [EC:2.7.7.18]	4	3	3	3	3	3	3	2	3	3	3	0	0	3	3	3	3	3	2	3	4	4	3	4	3	3	2	3	3	3	3
K00969	Metabolism of cofactors and vitamins	nadD; nicotinate-nucleotide adenylyltransferase [EC:2.7.7.18]	4	3	3	3	3	3	3	2	3	3	3	0	0	3	3	3	3	3	2	3	4	4	3	4	3	3	2	3	3	3	3
K00970	Folding, sorting and degradation	pcnB; poly(A) polymerase [EC:2.7.7.19]	1	2	2	2	2	1	1	2	1	1	1	1	3	1	1	1	1	1	1	1	1	1	1	3	1	1	1	1	1	1	1
K00971	Carbohydrate metabolism	manC, cpsB; mannose-1-phosphate guanylyltransferase [EC:2.7.7.13]	2	3	2	2	1	2	1	2	2	2	2	0	2	2	0	2	3	1	0	2	2	2	2	1	3	2	2	2	3	0	2
K00973	Glycan biosynthesis and metabolism	rfbA, rmlA, rffH; glucose-1-phosphate thymidylyltransferase [EC:2.7.7.24]	1	1	1	1	2	1	2	2	1	2	2	1	1	2	2	1	1	1	2	2	2	2	1	1	1	1	1	1	1	1	1
K00974	Protein families: genetic information processing	cca; tRNA nucleotidyltransferase (CCA-adding enzyme) [EC:2.7.7.72 3.1.3.- 3.1.4.-]	6	4	1	3	4	2	4	1	1	4	2	2	2	1	1	1	1	1	2	1	3	3	2	4	2	2	3	2	2	4	2
K00974	Protein families: genetic information processing	cca; tRNA nucleotidyltransferase (CCA-adding enzyme) [EC:2.7.7.72 3.1.3.- 3.1.4.-]	6	4	1	3	4	2	4	1	1	4	2	2	2	1	1	1	1	1	2	1	3	3	2	4	2	2	3	2	2	4	2
K00975	Carbohydrate metabolism	glgC; glucose-1-phosphate adenylyltransferase [EC:2.7.7.27]	2	2	2	2	2	2	3	2	3	2	2	2	0	2	2	2	3	2	2	2	2	2	2	2	2	2	2	2	2	2	2
K00979	Glycan biosynthesis and metabolism	kdsB; 3-deoxy-manno-octulosonate cytidylyltransferase (CMP-KDO synthetase) [EC:2.7.7.38]	0	0	0	0	0	0	1	1	3	3	1	1	0	4	0	2	2	2	1	3	0	0	0	0	0	0	0	0	0	0	0
K00981	Lipid metabolism	E2.7.7.41, CDS1, CDS2, cdsA; phosphatidate cytidylyltransferase [EC:2.7.7.41]	1	1	1	1	1	1	1	1	1	1	1	1	2	1	1	1	1	1	1	1	1	1	1	1	1	1	1	1	1	1	1
K00981	Lipid metabolism	E2.7.7.41, CDS1, CDS2, cdsA; phosphatidate cytidylyltransferase [EC:2.7.7.41]	1	1	1	1	1	1	1	1	1	1	1	1	2	1	1	1	1	1	1	1	1	1	1	1	1	1	1	1	1	1	1
K00984	Protein families: signaling and cellular processes	aadA; streptomycin 3"-adenylyltransferase [EC:2.7.7.47]	0	0	0	0	0	0	0	0	0	0	0	0	0	0	0	0	0	0	0	0	0	0	0	1	0	0	0	0	0	1	0
K00986	Unclassified: metabolism	ltrA; RNA-directed DNA polymerase [EC:2.7.7.49]	0	0	0	0	0	0	0	0	0	0	0	0	0	0	0	0	0	0	0	0	0	0	0	1	1	0	0	0	0	0	0
K00989	Protein families: genetic information processing	rph; ribonuclease PH [EC:2.7.7.56]	1	1	1	1	1	1	1	1	1	1	1	1	1	1	1	1	1	1	1	1	1	1	1	1	2	1	0	1	1	1	1
K00991	Metabolism of terpenoids and polyketides	ispD; 2-C-methyl-D-erythritol 4-phosphate cytidylyltransferase [EC:2.7.7.60]	2	3	3	2	4	2	2	3	2	2	2	1	3	2	2	2	2	4	0	2	2	2	2	2	2	2	2	2	1	2	2
K00991	Metabolism of terpenoids and polyketides	ispD; 2-C-methyl-D-erythritol 4-phosphate cytidylyltransferase [EC:2.7.7.60]	2	3	3	2	4	2	2	3	2	2	2	1	3	2	2	2	2	4	0	2	2	2	2	2	2	2	2	2	1	2	2
K00997	Metabolism of cofactors and vitamins	acpS; holo-[acyl-carrier protein] synthase [EC:2.7.8.7]	1	1	1	1	1	1	1	1	1	1	1	0	1	1	1	1	1	1	1	1	1	1	1	1	1	1	1	1	1	1	1
K00997	Metabolism of cofactors and vitamins	acpS; holo-[acyl-carrier protein] synthase [EC:2.7.8.7]	1	1	1	1	1	1	1	1	1	1	1	0	1	1	1	1	1	1	1	1	1	1	1	1	1	1	1	1	1	1	1
K01000	Glycan biosynthesis and metabolism	mraY; phospho-N-acetylmuramoyl-pentapeptide-transferase [EC:2.7.8.13]	1	1	1	1	1	1	1	1	1	1	1	1	1	1	1	1	1	1	0	1	1	1	1	1	1	1	1	1	1	1	1
K01002	Unclassified: metabolism	mdoB; phosphoglycerol transferase [EC:2.7.8.20]	0	0	0	0	0	0	0	0	0	0	0	0	0	0	0	0	0	0	0	0	0	0	0	0	0	0	0	0	0	1	0
K01006	Carbohydrate metabolism	ppdK; pyruvate, orthophosphate dikinase [EC:2.7.9.1]	1	1	1	1	1	1	1	1	1	1	1	1	1	1	1	3	1	1	1	1	1	1	1	1	1	1	1	1	2	2	1
K01012	Metabolism of cofactors and vitamins	bioB; biotin synthase [EC:2.8.1.6]	3	3	3	2	2	2	1	1	1	1	2	1	3	1	0	1	2	1	1	1	2	2	1	2	1	1	1	1	1	1	1
K01012	Metabolism of cofactors and vitamins	bioB; biotin synthase [EC:2.8.1.6]	3	3	3	2	2	2	1	1	1	1	2	1	3	1	0	1	2	1	1	1	2	2	1	2	1	1	1	1	1	1	1
K01014	Cancer: overview	SULT1A; aryl sulfotransferase [EC:2.8.2.1]	0	0	0	0	0	0	0	0	0	0	0	0	0	0	0	0	0	0	0	0	0	0	0	0	0	0	0	0	0	1	0
K01023	Unclassified: metabolism	assT; arylsulfate sulfotransferase [EC:2.8.2.22]	0	0	0	0	0	0	0	0	0	0	0	0	0	0	0	0	0	0	0	0	0	0	0	0	0	0	0	0	1	0	0
K01046	Lipid metabolism	lip, TGL2; triacylglycerol lipase [EC:3.1.1.3]	0	0	0	0	0	0	0	0	0	0	0	0	0	0	0	0	0	0	0	0	0	0	0	0	0	1	1	0	0	1	0
K01056	Protein families: genetic information processing	PTH1, PTRH1, pth, spoVC; peptidyl-tRNA hydrolase, PTH1 family [EC:3.1.1.29]	1	1	1	1	1	1	1	1	1	1	1	1	1	1	1	1	1	1	1	1	1	1	1	1	1	1	1	1	1	1	1
K01057	Carbohydrate metabolism	PGLS, pgl, devB; 6-phosphogluconolactonase [EC:3.1.1.31]	1	1	1	1	1	1	1	2	1	1	1	1	1	1	0	1	0	1	1	1	1	2	2	3	2	2	2	2	2	2	2
K01061	Xenobiotics biodegradation and metabolism	E3.1.1.45; carboxymethylenebutenolidase [EC:3.1.1.45]	0	0	0	0	0	0	0	0	1	1	0	0	0	1	0	0	1	0	0	1	0	0	0	0	0	0	0	0	0	0	0
K01069	Carbohydrate metabolism	gloB, gloC, HAGH; hydroxyacylglutathione hydrolase [EC:3.1.2.6]	0	0	1	0	0	0	1	0	1	0	0	0	0	0	1	1	1	1	1	1	1	1	0	0	0	1	0	0	0	0	0
K01077	Metabolism of cofactors and vitamins	E3.1.3.1, phoA, phoB; alkaline phosphatase [EC:3.1.3.1]	2	2	2	4	2	3	2	2	1	2	1	0	2	0	0	0	1	1	0	1	2	2	0	1	0	0	0	0	0	0	0
K01081	Nucleotide metabolism	E3.1.3.5; 5'-nucleotidase [EC:3.1.3.5]	0	0	0	0	0	0	0	0	0	0	0	0	0	0	0	0	0	0	0	0	0	0	1	0	1	1	0	1	1	1	1
K01082	Energy metabolism	cysQ, MET22, BPNT1; 3'(2'), 5'-bisphosphate nucleotidase [EC:3.1.3.7]	0	0	0	0	0	0	0	0	0	0	1	0	0	0	0	0	0	0	0	0	0	0	0	0	0	0	0	0	0	0	0
K01083	Carbohydrate metabolism	E3.1.3.8; 3-phytase [EC:3.1.3.8]	0	0	0	0	0	0	0	0	0	0	0	0	0	0	0	0	0	0	0	0	1	1	0	0	0	0	0	0	0	0	0
K01087	Carbohydrate metabolism	otsB; trehalose 6-phosphate phosphatase [EC:3.1.3.12]	0	0	1	0	0	0	0	0	0	0	0	0	0	0	0	0	0	0	0	0	0	0	1	2	1	1	0	1	1	1	1
K01089	Amino acid metabolism	hisB; imidazoleglycerol-phosphate dehydratase / histidinol-phosphatase [EC:4.2.1.19 3.1.3.15]	1	1	1	1	1	1	1	1	1	1	1	0	1	1	1	1	1	1	1	1	1	1	1	1	1	1	1	1	1	1	1
K01090	Unclassified: metabolism	E3.1.3.16; protein phosphatase [EC:3.1.3.16]	0	0	0	0	0	0	0	0	0	0	0	0	0	0	0	0	0	0	0	0	0	0	1	1	1	1	0	0	0	0	0
K01091	Carbohydrate metabolism	gph; phosphoglycolate phosphatase [EC:3.1.3.18]	2	2	3	1	2	2	2	2	2	3	2	0	2	2	1	2	3	2	1	2	2	2	4	4	5	4	3	4	4	5	4
K01092	Carbohydrate metabolism	E3.1.3.25, IMPA, suhB; myo-inositol-1(or 4)-monophosphatase [EC:3.1.3.25]	1	1	1	1	1	1	1	1	2	2	1	1	1	2	1	1	2	1	1	2	2	2	2	2	2	2	1	2	2	3	2
K01092	Carbohydrate metabolism	E3.1.3.25, IMPA, suhB; myo-inositol-1(or 4)-monophosphatase [EC:3.1.3.25]	1	1	1	1	1	1	1	1	2	2	1	1	1	2	1	1	2	1	1	2	2	2	2	2	2	2	1	2	2	3	2
K01101	Xenobiotics biodegradation and metabolism	E3.1.3.41; 4-nitrophenyl phosphatase [EC:3.1.3.41]	2	2	2	2	2	2	2	2	1	2	2	2	3	2	2	1	2	1	1	2	3	3	2	5	3	2	1	2	3	3	2
K01101	Xenobiotics biodegradation and metabolism	E3.1.3.41; 4-nitrophenyl phosphatase [EC:3.1.3.41]	2	2	2	2	2	2	2	2	1	2	2	2	3	2	2	1	2	1	1	2	3	3	2	5	3	2	1	2	3	3	2
K01104	Unclassified: metabolism	E3.1.3.48; protein-tyrosine phosphatase [EC:3.1.3.48]	0	0	0	0	0	0	0	0	0	0	0	0	0	0	0	0	0	0	0	0	1	1	0	0	0	0	0	0	0	0	0
K01113	Metabolism of cofactors and vitamins	phoD; alkaline phosphatase D [EC:3.1.3.1]	0	0	0	0	0	0	0	0	0	0	0	0	0	0	0	0	0	0	0	0	1	1	0	0	0	0	0	0	0	0	0
K01114	Carbohydrate metabolism	plc; phospholipase C [EC:3.1.4.3]	0	0	0	0	0	0	0	1	0	0	0	0	0	0	0	0	0	0	0	0	0	0	0	0	0	0	0	0	1	0	0
K01126	Lipid metabolism	E3.1.4.46, glpQ, ugpQ; glycerophosphoryl diester phosphodiesterase [EC:3.1.4.46]	0	0	0	0	0	0	1	0	0	1	0	1	0	1	0	1	1	2	0	1	1	0	0	0	0	0	0	0	0	0	0
K01129	Nucleotide metabolism	dgt; dGTPase [EC:3.1.5.1]	1	1	1	1	1	1	1	1	1	1	1	0	1	1	1	2	1	1	1	1	1	1	1	1	1	1	1	1	1	1	1
K01130	Lipid metabolism	E3.1.6.1; arylsulfatase [EC:3.1.6.1]	0	0	0	0	0	0	0	0	0	0	0	0	0	0	0	0	0	0	0	0	0	0	0	0	2	1	0	2	3	1	1
K01133	Unclassified: metabolism	betC; choline-sulfatase [EC:3.1.6.6]	0	0	0	0	0	0	0	0	0	0	0	0	0	0	0	0	0	1	0	0	0	0	0	0	0	0	0	0	0	0	0
K01137	Glycan biosynthesis and metabolism	GNS; N-acetylglucosamine-6-sulfatase [EC:3.1.6.14]	0	0	0	0	0	0	0	0	0	0	0	0	0	0	0	0	0	1	0	0	0	0	0	0	0	0	0	0	0	0	0
K01138	Unclassified: metabolism	K01138; uncharacterized sulfatase [EC:3.1.6.-]	0	0	0	0	0	0	0	0	0	0	0	0	0	0	0	0	0	2	0	0	0	0	0	0	0	0	0	0	0	1	0
K01138	Unclassified: metabolism	K01138; uncharacterized sulfatase [EC:3.1.6.-]	0	0	0	0	0	0	0	0	0	0	0	0	0	0	0	0	0	2	0	0	0	0	0	0	0	0	0	0	0	1	0
K01139	Nucleotide metabolism	spoT; GTP diphosphokinase / guanosine-3',5'-bis(diphosphate) 3'-diphosphatase [EC:2.7.6.5 3.1.7.2]	0	1	0	1	0	0	0	0	0	0	0	0	0	0	0	0	0	0	0	0	0	0	0	0	1	0	0	0	0	0	0
K01142	Replication and repair	E3.1.11.2, xthA; exodeoxyribonuclease III [EC:3.1.11.2]	1	1	1	1	1	1	1	1	1	1	1	0	1	1	1	1	1	0	1	1	2	1	2	2	2	2	1	2	2	2	2
K01146	Unclassified: genetic information processing	xni; protein Xni	0	0	0	0	0	1	0	0	1	1	0	0	0	1	1	1	1	1	0	1	0	0	0	0	0	0	0	0	0	0	0
K01153	Protein families: signaling and cellular processes	hsdR; type I restriction enzyme, R subunit [EC:3.1.21.3]	1	0	1	0	0	0	1	1	3	3	1	2	0	1	0	2	6	5	2	3	0	1	1	5	8	4	1	3	1	2	0
K01154	Protein families: signaling and cellular processes	hsdS; type I restriction enzyme, S subunit [EC:3.1.21.3]	0	0	0	0	0	0	0	1	2	2	1	0	0	2	1	1	1	3	1	2	1	1	0	4	5	2	0	7	0	3	0
K01155	Protein families: signaling and cellular processes	E3.1.21.4; type II restriction enzyme [EC:3.1.21.4]	0	0	0	0	0	0	0	0	1	0	0	0	0	0	0	0	1	0	0	1	0	1	1	3	1	1	0	0	0	1	0
K01156	Protein families: signaling and cellular processes	res; type III restriction enzyme [EC:3.1.21.5]	0	0	0	0	0	0	0	0	1	0	0	1	1	0	0	0	0	0	0	0	0	0	0	3	1	1	0	0	0	0	1
K01159	Replication and repair	ruvC; crossover junction endodeoxyribonuclease RuvC [EC:3.1.21.10]	1	1	1	1	1	1	1	1	1	1	1	1	1	1	1	1	1	1	1	1	2	2	1	1	1	1	1	1	1	1	1
K01174	Unclassified: metabolism	nuc; micrococcal nuclease [EC:3.1.31.1]	1	1	2	1	1	1	1	1	1	1	2	1	0	1	1	1	1	1	1	1	1	1	4	3	5	2	0	2	2	2	2
K01174	Unclassified: metabolism	nuc; micrococcal nuclease [EC:3.1.31.1]	1	1	2	1	1	1	1	1	1	1	2	1	0	1	1	1	1	1	1	1	1	1	4	3	5	2	0	2	2	2	2
K01176	Carbohydrate metabolism	AMY, amyA, malS; alpha-amylase [EC:3.2.1.1]	0	1	2	0	0	0	1	1	1	1	0	0	0	1	1	0	2	0	0	1	1	1	0	0	0	0	0	0	0	0	0
K01176	Carbohydrate metabolism	AMY, amyA, malS; alpha-amylase [EC:3.2.1.1]	0	1	2	0	0	0	1	1	1	1	0	0	0	1	1	0	2	0	0	1	1	1	0	0	0	0	0	0	0	0	0
K01179	Carbohydrate metabolism	E3.2.1.4; endoglucanase [EC:3.2.1.4]	1	1	2	2	1	1	1	4	1	1	2	1	1	1	3	1	4	1	1	1	2	3	1	1	2	3	2	1	1	1	1
K01181	Unclassified: metabolism	E3.2.1.8, xynA; endo-1,4-beta-xylanase [EC:3.2.1.8]	1	1	1	1	0	0	0	0	0	0	0	0	0	0	0	0	1	0	0	0	0	0	0	0	0	0	0	0	0	0	0
K01181	Unclassified: metabolism	E3.2.1.8, xynA; endo-1,4-beta-xylanase [EC:3.2.1.8]	1	1	1	1	0	0	0	0	0	0	0	0	0	0	0	0	1	0	0	0	0	0	0	0	0	0	0	0	0	0	0
K01183	Carbohydrate metabolism	E3.2.1.14; chitinase [EC:3.2.1.14]	0	0	0	0	0	0	0	0	0	0	0	0	0	0	2	0	1	0	0	0	0	0	1	0	1	1	0	1	1	0	1
K01186	Lipid metabolism	NEU1; sialidase-1 [EC:3.2.1.18]	0	0	0	0	0	0	0	0	0	0	0	0	0	0	0	0	0	0	0	0	0	0	1	0	1	1	0	0	0	0	0
K01187	Carbohydrate metabolism	malZ; alpha-glucosidase [EC:3.2.1.20]	1	1	2	1	1	1	1	1	1	1	1	1	1	1	1	1	1	0	1	1	1	1	1	2	1	1	1	1	1	1	1
K01191	Glycan biosynthesis and metabolism	MAN2C1; alpha-mannosidase [EC:3.2.1.24]	0	0	1	1	1	2	1	0	1	2	3	0	0	1	1	1	2	0	0	1	0	1	0	1	0	1	0	0	1	0	0
K01191	Glycan biosynthesis and metabolism	MAN2C1; alpha-mannosidase [EC:3.2.1.24]	0	0	1	1	1	2	1	0	1	2	3	0	0	1	1	1	2	0	0	1	0	1	0	1	0	1	0	0	1	0	0
K01192	Glycan biosynthesis and metabolism	E3.2.1.25, MANBA, manB; beta-mannosidase [EC:3.2.1.25]	1	1	1	1	2	0	1	0	1	1	2	0	2	1	2	1	2	1	1	1	1	1	0	0	0	0	0	0	0	0	0
K01193	Carbohydrate metabolism	INV, sacA; beta-fructofuranosidase [EC:3.2.1.26]	0	0	0	0	0	0	1	0	0	0	1	0	0	0	0	0	0	0	0	0	1	1	0	0	0	0	0	0	0	0	0
K01195	Carbohydrate metabolism	uidA, GUSB; beta-glucuronidase [EC:3.2.1.31]	0	0	0	0	0	0	0	0	0	0	0	0	0	0	0	0	1	0	0	0	0	0	0	0	0	0	0	0	0	0	0
K01206	Glycan biosynthesis and metabolism	FUCA; alpha-L-fucosidase [EC:3.2.1.51]	0	0	1	0	1	1	1	0	1	1	0	0	0	1	0	0	1	0	0	1	0	0	0	0	0	0	0	0	0	0	0
K01207	Carbohydrate metabolism	nagZ; beta-N-acetylhexosaminidase [EC:3.2.1.52]	0	0	0	1	0	0	1	0	1	1	0	0	1	1	0	0	1	1	1	1	0	1	3	2	4	2	0	3	4	3	3
K01207	Carbohydrate metabolism	nagZ; beta-N-acetylhexosaminidase [EC:3.2.1.52]	0	0	0	1	0	0	1	0	1	1	0	0	1	1	0	0	1	1	1	1	0	1	3	2	4	2	0	3	4	3	3
K01208	Carbohydrate metabolism	cd, ma, nplT; cyclomaltodextrinase / maltogenic alpha-amylase / neopullulanase [EC:3.2.1.54 3.2.1.133 3.2.1.135]	1	0	1	1	1	1	0	0	0	0	1	0	1	0	0	0	1	0	0	0	0	0	0	0	0	0	0	0	0	0	0
K01208	Carbohydrate metabolism	cd, ma, nplT; cyclomaltodextrinase / maltogenic alpha-amylase / neopullulanase [EC:3.2.1.54 3.2.1.133 3.2.1.135]	1	0	1	1	1	1	0	0	0	0	1	0	1	0	0	0	1	0	0	0	0	0	0	0	0	0	0	0	0	0	0
K01209	Carbohydrate metabolism	abfA; alpha-L-arabinofuranosidase [EC:3.2.1.55]	2	2	4	4	1	0	1	2	0	1	3	0	0	1	1	0	0	0	0	1	1	0	1	2	2	2	0	1	1	1	1
K01214	Carbohydrate metabolism	ISA, treX; isoamylase [EC:3.2.1.68]	0	0	0	0	0	1	0	0	0	0	0	0	0	0	0	0	0	0	0	0	0	0	0	0	0	0	0	0	0	0	0
K01218	Carbohydrate metabolism	gmuG; mannan endo-1,4-beta-mannosidase [EC:3.2.1.78]	1	1	1	1	0	0	0	0	0	0	0	0	0	0	0	0	0	0	0	0	0	0	0	0	0	0	0	0	0	0	0
K01222	Carbohydrate metabolism	E3.2.1.86A, celF; 6-phospho-beta-glucosidase [EC:3.2.1.86]	2	4	3	4	3	4	5	2	4	5	3	2	1	11	1	3	6	3	2	7	2	4	0	1	0	0	0	1	0	1	0
K01224	Unclassified: metabolism	E3.2.1.89; arabinogalactan endo-1,4-beta-galactosidase [EC:3.2.1.89]	0	0	0	0	0	0	0	0	1	1	0	0	0	1	0	2	2	0	0	1	0	0	0	0	0	0	0	0	0	0	0
K01235	Unclassified: metabolism	aguA; alpha-glucuronidase [EC:3.2.1.139]	0	0	0	0	0	0	0	0	0	0	0	0	0	0	0	0	1	0	0	0	0	0	0	0	0	0	0	0	0	0	0
K01236	Carbohydrate metabolism	treZ, glgZ; maltooligosyltrehalose trehalohydrolase [EC:3.2.1.141]	1	2	2	1	1	1	2	2	1	1	1	1	1	1	1	1	1	0	1	1	1	1	1	2	1	1	1	1	1	1	1
K01239	Nucleotide metabolism	E3.2.2.1; purine nucleosidase [EC:3.2.2.1]	0	0	0	0	0	1	0	0	0	1	1	0	0	0	1	0	1	1	0	0	0	0	0	1	0	3	0	0	1	0	0
K01247	Replication and repair	alkA; DNA-3-methyladenine glycosylase II [EC:3.2.2.21]	0	0	0	0	0	0	0	0	1	1	0	1	0	1	1	1	1	1	1	1	2	1	1	2	1	0	0	1	1	1	1
K01247	Replication and repair	alkA; DNA-3-methyladenine glycosylase II [EC:3.2.2.21]	0	0	0	0	0	0	0	0	1	1	0	1	0	1	1	1	1	1	1	1	2	1	1	2	1	0	0	1	1	1	1
K01250	Unclassified: metabolism	rihA; pyrimidine-specific ribonucleoside hydrolase [EC:3.2.2.-]	0	1	0	1	0	2	1	0	0	1	1	0	0	0	1	0	1	1	0	0	0	0	0	0	0	0	0	0	0	0	0
K01250	Unclassified: metabolism	rihA; pyrimidine-specific ribonucleoside hydrolase [EC:3.2.2.-]	0	1	0	1	0	2	1	0	0	1	1	0	0	0	1	0	1	1	0	0	0	0	0	0	0	0	0	0	0	0	0
K01251	Amino acid metabolism	AHCY, ahcY; adenosylhomocysteinase [EC:3.13.2.1]	1	1	2	1	1	1	1	1	1	1	1	1	1	1	1	1	1	1	0	1	1	1	1	2	1	1	1	1	1	1	1
K01259	Amino acid metabolism	pip; proline iminopeptidase [EC:3.4.11.5]	0	0	0	0	0	0	0	0	0	0	0	0	0	0	0	0	0	0	0	0	0	0	0	1	0	1	0	0	0	0	0
K01262	Protein families: metabolism	pepP; Xaa-Pro aminopeptidase [EC:3.4.11.9]	1	2	2	3	1	2	2	2	4	4	3	1	1	3	1	2	2	1	0	3	1	1	6	7	7	7	2	6	3	6	5
K01265	Protein families: metabolism	map; methionyl aminopeptidase [EC:3.4.11.18]	1	1	1	1	1	1	1	1	1	1	1	1	1	1	1	1	1	1	1	1	1	1	1	1	1	1	1	1	1	1	1
K01266	Protein families: metabolism	dmpA, dap; D-aminopeptidase [EC:3.4.11.19]	0	0	0	0	0	0	0	0	0	0	0	0	0	0	0	0	0	0	0	0	0	0	0	0	0	0	0	0	0	0	1
K01271	Protein families: metabolism	pepQ; Xaa-Pro dipeptidase [EC:3.4.13.9]	2	2	2	2	1	2	2	2	3	3	2	1	2	3	2	2	3	2	1	3	2	2	2	3	2	2	1	2	3	2	2
K01284	Protein families: metabolism	dcp; peptidyl-dipeptidase Dcp [EC:3.4.15.5]	0	0	0	0	0	0	0	0	1	1	0	0	0	1	1	1	1	1	0	1	0	0	2	1	1	1	0	1	1	0	1
K01286	Unclassified: metabolism	E3.4.16.4; D-alanyl-D-alanine carboxypeptidase [EC:3.4.16.4]	0	0	0	0	0	0	0	0	0	0	0	0	0	0	1	0	0	0	0	0	0	0	0	0	0	0	0	0	0	0	0
K01297	Protein families: metabolism	ldcA; muramoyltetrapeptide carboxypeptidase [EC:3.4.17.13]	1	1	1	1	0	0	1	1	0	0	0	0	0	0	0	0	0	0	0	0	0	0	0	0	1	0	0	0	0	2	0
K01303	Protein families: metabolism	APEH; acylaminoacyl-peptidase [EC:3.4.19.1]	0	0	0	0	0	0	0	0	0	0	0	0	0	0	0	0	0	0	0	0	0	1	0	1	0	0	0	0	0	0	0
K01317	Protein families: metabolism	ACR; acrosin [EC:3.4.21.10]	0	0	0	0	0	0	1	0	0	0	0	0	0	0	0	0	0	0	0	0	0	0	1	1	1	1	0	1	1	1	1
K01337	Protein families: metabolism	E3.4.21.50; lysyl endopeptidase [EC:3.4.21.50]	0	0	0	0	0	0	0	1	0	0	0	0	0	0	0	0	0	0	0	0	0	0	0	0	0	1	0	0	0	0	0
K01338	Cell growth and death	lon; ATP-dependent Lon protease [EC:3.4.21.53]	2	2	3	2	2	3	2	2	5	3	2	2	3	2	3	3	2	3	3	3	1	1	2	4	3	2	2	2	2	3	2
K01356	Protein families: metabolism	lexA; repressor LexA [EC:3.4.21.88]	2	2	2	3	2	2	2	3	1	1	2	1	2	1	1	1	1	1	1	1	2	1	1	2	1	2	2	1	0	1	1
K01358	Cell growth and death	clpP, CLPP; ATP-dependent Clp protease, protease subunit [EC:3.4.21.92]	1	1	1	1	1	1	1	1	1	1	1	1	1	1	1	1	1	1	1	1	1	1	1	2	1	1	1	1	1	1	1
K01361	Protein families: metabolism	E3.4.21.96; lactocepin [EC:3.4.21.96]	0	0	1	0	0	0	0	0	1	1	0	0	0	1	0	0	2	0	0	1	0	0	0	0	0	0	0	0	0	0	0
K01361	Protein families: metabolism	E3.4.21.96; lactocepin [EC:3.4.21.96]	0	0	1	0	0	0	0	0	1	1	0	0	0	1	0	0	2	0	0	1	0	0	0	0	0	0	0	0	0	0	0
K01372	Protein families: metabolism	BLMH, pepC; bleomycin hydrolase [EC:3.4.22.40]	0	0	0	0	0	0	0	0	0	0	0	0	0	0	0	0	0	0	0	0	0	0	0	0	0	0	0	0	0	1	0
K01387	Protein families: metabolism	colA; microbial collagenase [EC:3.4.24.3]	0	0	0	0	0	0	0	1	0	0	0	0	0	0	0	0	0	0	0	0	0	0	0	0	0	1	0	0	1	0	0
K01387	Protein families: metabolism	colA; microbial collagenase [EC:3.4.24.3]	0	0	0	0	0	0	0	1	0	0	0	0	0	0	0	0	0	0	0	0	0	0	0	0	0	1	0	0	1	0	0
K01409	Protein families: genetic information processing	OSGEP, KAE1, QRI7; N6-L-threonylcarbamoyladenine synthase [EC:2.3.1.234]	2	2	2	2	2	2	2	2	2	2	2	2	2	2	2	2	2	2	2	2	2	2	2	2	2	3	1	2	2	2	2
K01419	Protein families: metabolism	hslV, clpQ; ATP-dependent HslUV protease, peptidase subunit HslV [EC:3.4.25.2]	1	1	1	1	1	1	1	1	1	1	1	2	1	1	1	1	1	1	0	1	1	1	1	1	1	1	1	1	1	1	1
K01420	Protein families: genetic information processing	fnr; CRP/FNR family transcriptional regulator, anaerobic regulatory protein	0	0	0	0	0	0	0	0	0	0	0	0	0	0	0	0	0	0	0	0	0	0	0	0	0	0	0	0	0	1	0
K01424	Amino acid metabolism	E3.5.1.1, ansA, ansB; L-asparaginase [EC:3.5.1.1]	1	1	1	1	1	1	1	1	1	1	1	1	1	1	2	0	1	1	0	1	1	1	1	1	1	1	1	1	1	1	1
K01426	Amino acid metabolism	E3.5.1.4, amiE; amidase [EC:3.5.1.4]	0	0	0	0	0	0	0	0	0	0	0	1	0	0	0	0	0	0	0	0	0	0	0	0	1	1	0	0	2	0	2
K01427	Nucleotide metabolism	URE; urease [EC:3.5.1.5]	0	0	0	0	0	0	0	0	0	0	0	0	0	0	0	0	0	0	0	0	1	0	0	0	0	0	0	0	0	0	0
K01428	Nucleotide metabolism	ureC; urease subunit alpha [EC:3.5.1.5]	0	0	0	0	0	0	0	0	0	0	0	0	0	0	0	0	0	0	0	0	2	0	0	0	0	0	0	0	0	0	0
K01428	Nucleotide metabolism	ureC; urease subunit alpha [EC:3.5.1.5]	0	0	0	0	0	0	0	0	0	0	0	0	0	0	0	0	0	0	0	0	2	0	0	0	0	0	0	0	0	0	0
K01429	Nucleotide metabolism	ureB; urease subunit beta [EC:3.5.1.5]	0	0	0	0	0	0	0	0	0	0	0	0	0	0	0	0	0	0	0	0	2	0	0	0	0	0	0	0	0	0	0
K01429	Nucleotide metabolism	ureB; urease subunit beta [EC:3.5.1.5]	0	0	0	0	0	0	0	0	0	0	0	0	0	0	0	0	0	0	0	0	2	0	0	0	0	0	0	0	0	0	0
K01430	Nucleotide metabolism	ureA; urease subunit gamma [EC:3.5.1.5]	0	0	0	0	0	0	0	0	0	0	0	0	0	0	0	0	0	0	0	0	1	0	0	0	0	0	0	0	0	0	0
K01431	Nucleotide metabolism	UPB1, pydC; beta-ureidopropionase [EC:3.5.1.6]	0	0	0	0	0	0	0	0	0	0	0	0	0	0	0	0	0	0	0	0	0	1	0	0	0	0	0	0	0	0	0
K01436	Protein families: metabolism	yhaA; amidohydrolase [EC:3.5.1.-]	0	0	0	0	0	0	0	0	0	0	0	0	0	0	0	0	0	0	0	0	0	0	0	1	2	1	0	1	1	1	1
K01438	Amino acid metabolism	argE; acetylornithine deacetylase [EC:3.5.1.16]	2	2	3	2	2	2	2	2	1	1	2	0	2	1	1	1	1	1	1	1	2	2	1	2	3	2	0	2	2	2	2
K01438	Amino acid metabolism	argE; acetylornithine deacetylase [EC:3.5.1.16]	2	2	3	2	2	2	2	2	1	1	2	0	2	1	1	1	1	1	1	1	2	2	1	2	3	2	0	2	2	2	2
K01439	Amino acid metabolism	dapE; succinyl-diaminopimelate desuccinylase [EC:3.5.1.18]	2	2	3	2	2	2	2	2	1	1	2	0	2	1	1	1	1	1	1	1	2	2	1	2	3	2	0	2	2	2	2
K01442	Lipid metabolism	cbh; choloylglycine hydrolase [EC:3.5.1.24]	0	0	0	0	0	0	0	0	0	0	0	0	0	0	0	0	0	0	0	0	0	0	1	2	1	1	0	1	2	1	1
K01443	Carbohydrate metabolism	nagA, AMDHD2; N-acetylglucosamine-6-phosphate deacetylase [EC:3.5.1.25]	0	1	0	0	0	1	2	2	2	3	2	1	0	1	1	0	2	0	1	2	0	2	1	3	1	1	2	1	2	1	1
K01444	Glycan biosynthesis and metabolism	AGA, aspG; N4-(beta-N-acetylglucosaminyl)-L-asparaginase [EC:3.5.1.26]	0	0	0	0	0	0	0	0	0	0	0	1	0	0	1	0	0	0	0	0	0	0	0	0	0	0	0	0	0	0	0
K01447	Unclassified: metabolism	xlyAB; N-acetylmuramoyl-L-alanine amidase [EC:3.5.1.28]	0	0	0	0	0	0	0	0	0	0	0	0	0	0	0	1	0	0	0	0	0	0	0	0	0	0	0	0	0	0	0
K01448	Drug resistance: antimicrobial	amiABC; N-acetylmuramoyl-L-alanine amidase [EC:3.5.1.28]	1	1	1	1	1	1	1	1	1	1	2	1	1	1	1	2	1	1	0	2	1	1	1	1	2	2	0	1	1	2	1
K01448	Drug resistance: antimicrobial	amiABC; N-acetylmuramoyl-L-alanine amidase [EC:3.5.1.28]	1	1	1	1	1	1	1	1	1	1	2	1	1	1	1	2	1	1	0	2	1	1	1	1	2	2	0	1	1	2	1
K01459	Unclassified: metabolism	E3.5.1.77; N-carbamoyl-D-amino-acid hydrolase [EC:3.5.1.77]	0	0	0	0	0	0	1	1	0	0	0	0	0	0	0	0	0	0	0	0	0	0	1	0	1	1	0	1	1	1	1
K01462	Unclassified: metabolism	PDF, def; peptide deformylase [EC:3.5.1.88]	1	1	1	1	1	1	1	1	1	1	1	1	1	1	1	1	1	1	1	1	1	1	1	1	1	1	1	1	1	1	1
K01463	Unclassified: metabolism	bshB1; N-acetylglucosamine malate deacetylase 1 [EC:3.5.1.-]	1	0	0	1	1	1	0	0	0	0	1	0	0	0	0	0	0	0	0	0	0	0	0	0	0	0	0	1	0	0	0
K01464	Nucleotide metabolism	DPYS, dht, hydA; dihydropyrimidinase [EC:3.5.2.2]	0	0	0	0	0	0	0	0	0	0	0	0	0	0	0	0	0	0	0	0	0	1	0	0	0	0	0	0	0	0	0
K01465	Nucleotide metabolism	URA4, pyrC; dihydroorotase [EC:3.5.2.3]	1	1	1	1	1	1	1	1	1	2	2	1	1	1	1	1	1	1	1	1	1	1	2	2	2	1	0	2	2	2	2
K01465	Nucleotide metabolism	URA4, pyrC; dihydroorotase [EC:3.5.2.3]	1	1	1	1	1	1	1	1	1	2	2	1	1	1	1	1	1	1	1	1	1	1	2	2	2	1	0	2	2	2	2
K01469	Metabolism of other amino acids	OPLAH, OXP1, oplAH; 5-oxoprolinase (ATP-hydrolysing) [EC:3.5.2.9]	1	1	2	1	1	1	1	1	0	0	1	0	1	0	1	0	0	0	0	0	1	1	2	2	3	2	0	2	2	2	2
K01470	Amino acid metabolism	E3.5.2.10; creatinine amidohydrolase [EC:3.5.2.10]	2	2	3	2	2	3	4	1	2	2	3	0	2	3	2	0	1	1	1	3	3	2	3	2	3	2	1	3	2	3	3
K01474	Amino acid metabolism	hyuB; N-methylhydantoinase B [EC:3.5.2.14]	0	0	1	0	0	0	0	0	0	0	0	0	0	0	0	0	0	0	0	0	0	0	0	0	0	0	0	0	0	0	0
K01479	Amino acid metabolism	hutG; formiminoglutamase [EC:3.5.3.8]	0	0	0	0	0	0	0	0	0	0	0	0	0	0	0	0	0	0	0	0	0	0	1	1	1	0	0	1	1	2	0
K01480	Amino acid metabolism	speB; agmatinase [EC:3.5.3.11]	0	0	0	0	0	0	0	0	0	0	0	0	0	0	0	0	0	0	0	0	0	0	1	1	1	0	0	1	1	2	0
K01481	Unclassified: metabolism	E3.5.3.15; protein-arginine deiminase [EC:3.5.3.15]	0	0	0	0	0	0	0	0	1	0	0	0	0	0	0	0	0	1	0	0	0	0	0	0	0	0	0	0	0	0	0
K01483	Nucleotide metabolism	allA; ureidoglycolate lyase [EC:4.3.2.3]	0	0	0	0	0	0	0	0	1	1	0	1	0	1	0	0	1	0	0	1	0	0	1	0	2	2	0	1	2	2	2
K01485	Nucleotide metabolism	codA; cytosine/creatinine deaminase [EC:3.5.4.1 3.5.4.21]	1	1	1	1	1	1	1	1	1	0	1	0	0	1	0	1	1	1	1	1	0	0	0	0	1	0	0	0	0	1	0
K01485	Nucleotide metabolism	codA; cytosine/creatinine deaminase [EC:3.5.4.1 3.5.4.21]	1	1	1	1	1	1	1	1	1	0	1	0	0	1	0	1	1	1	1	1	0	0	0	0	1	0	0	0	0	1	0
K01487	Nucleotide metabolism	guaD, GDA; guanine deaminase [EC:3.5.4.3]	1	1	1	1	0	0	1	1	0	0	0	0	0	0	0	0	0	0	0	0	0	0	0	0	1	0	0	0	0	1	0
K01489	Nucleotide metabolism	cdd, CDA; cytidine deaminase [EC:3.5.4.5]	1	1	1	1	1	1	1	0	1	1	1	0	1	1	1	1	2	1	1	1	1	1	1	2	1	1	1	1	1	1	1
K01489	Nucleotide metabolism	cdd, CDA; cytidine deaminase [EC:3.5.4.5]	1	1	1	1	1	1	1	0	1	1	1	0	1	1	1	1	2	1	1	1	1	1	1	2	1	1	1	1	1	1	1
K01491	Energy metabolism	folD; methylenetetrahydrofolate dehydrogenase (NADP+) / methenyltetrahydrofolate cyclohydrolase [EC:1.5.1.5 3.5.4.9]	1	1	1	2	1	1	1	1	1	1	1	1	1	1	1	1	1	1	0	2	1	1	1	1	1	1	0	1	1	1	1
K01493	Nucleotide metabolism	comEB; dCMP deaminase [EC:3.5.4.12]	1	1	1	1	1	1	1	1	1	1	1	0	1	1	1	1	1	1	1	1	1	1	1	1	1	1	1	1	1	1	1
K01496	Amino acid metabolism	hisI; phosphoribosyl-AMP cyclohydrolase [EC:3.5.4.19]	1	1	1	1	1	1	1	1	1	1	1	1	1	1	1	1	1	1	1	1	1	1	1	1	1	1	1	1	1	1	1
K01497	Metabolism of cofactors and vitamins	ribA, RIB1; GTP cyclohydrolase II [EC:3.5.4.25]	0	0	0	0	0	0	0	0	0	0	0	1	0	0	0	0	0	0	0	0	0	0	0	0	0	0	0	0	0	0	0
K01501	Energy metabolism	E3.5.5.1; nitrilase [EC:3.5.5.1]	0	0	0	0	0	0	1	1	0	0	0	0	0	0	0	0	0	0	0	0	0	0	1	0	1	1	0	1	1	1	1
K01507	Energy metabolism	ppa; inorganic pyrophosphatase [EC:3.6.1.1]	0	0	0	0	0	0	0	1	0	0	0	0	0	0	0	0	0	0	0	0	0	0	0	0	0	0	0	0	0	0	0
K01512	Carbohydrate metabolism	acyP; acylphosphatase [EC:3.6.1.7]	1	1	1	1	1	1	1	1	1	1	1	1	1	0	1	1	1	1	1	1	1	1	1	1	1	1	0	1	1	1	1
K01515	Nucleotide metabolism	nudF; ADP-ribose pyrophosphatase [EC:3.6.1.13 3.6.1.-]	1	1	2	1	1	1	1	1	1	1	1	1	1	1	1	1	1	1	0	1	1	1	1	1	1	1	1	1	1	1	1
K01520	Nucleotide metabolism	dut, DUT; dUTP pyrophosphatase [EC:3.6.1.23]	1	1	1	1	1	1	1	1	1	1	1	1	1	1	1	1	1	1	1	1	1	1	1	1	1	1	1	1	1	1	1
K01523	Amino acid metabolism	hisE; phosphoribosyl-ATP pyrophosphohydrolase [EC:3.6.1.31]	1	1	1	1	1	1	1	1	1	1	1	1	1	1	1	1	1	1	1	1	1	1	1	1	1	1	1	1	1	1	1
K01524	Nucleotide metabolism	ppx-gppA; exopolyphosphatase / guanosine-5'-triphosphate,3'-diphosphate pyrophosphatase [EC:3.6.1.11 3.6.1.40]	1	1	1	2	1	1	5	5	0	2	1	1	0	2	0	1	3	0	1	2	3	3	1	2	2	2	0	1	1	2	2
K01531	Unclassified: metabolism	mgtA, mgtB; P-type Mg2+ transporter [EC:7.2.2.14]	0	0	0	0	0	0	0	0	0	0	0	1	0	0	1	0	0	0	0	0	0	0	0	0	2	0	0	0	0	1	0
K01533	Unclassified: metabolism	copB; P-type Cu2+ transporter [EC:7.2.2.9]	0	0	1	0	0	0	0	0	0	0	0	0	0	0	0	0	0	0	0	0	2	2	1	3	1	2	0	2	0	1	1
K01534	Unclassified: metabolism	zntA; Zn2+/Cd2+-exporting ATPase [EC:7.2.2.12 7.2.2.21]	0	0	0	0	0	0	1	2	0	0	0	0	0	0	0	0	0	0	0	0	1	1	0	0	0	0	0	0	0	0	0
K01535	Energy metabolism	PMA1, PMA2; H+-transporting ATPase [EC:7.1.2.1]	0	0	0	0	0	0	0	0	0	0	0	1	0	0	1	0	0	0	0	0	0	0	0	0	2	0	0	0	0	1	0
K01537	Unclassified: metabolism	ATP2C; P-type Ca2+ transporter type 2C [EC:7.2.2.10]	1	3	2	3	1	3	1	1	1	1	1	1	1	2	1	1	2	1	1	1	1	1	1	1	2	2	1	2	1	2	1
K01537	Unclassified: metabolism	ATP2C; P-type Ca2+ transporter type 2C [EC:7.2.2.10]	1	3	2	3	1	3	1	1	1	1	1	1	1	2	1	1	2	1	1	1	1	1	1	1	2	2	1	2	1	2	1
K01551	Protein families: genetic information processing	arsA, ASNA1, GET3; arsenite/tail-anchored protein-transporting ATPase [EC:7.3.2.7 7.3.-.-]	0	0	0	0	0	0	0	0	0	0	0	0	1	0	0	0	0	0	0	0	0	0	0	1	0	1	0	0	0	0	0
K01563	Xenobiotics biodegradation and metabolism	dhaA; haloalkane dehalogenase [EC:3.8.1.5]	1	1	1	1	0	0	1	1	0	0	0	0	0	0	0	0	0	0	0	0	0	0	0	0	1	0	0	0	0	1	0
K01574	Carbohydrate metabolism	adc; acetoacetate decarboxylase [EC:4.1.1.4]	0	0	0	0	0	0	0	0	0	0	1	0	0	0	0	0	0	0	0	0	0	0	0	0	0	0	0	0	0	0	0
K01575	Carbohydrate metabolism	alsD, budA, aldC; acetolactate decarboxylase [EC:4.1.1.5]	0	0	0	0	0	0	0	0	0	0	0	0	0	0	0	0	0	0	0	0	0	0	1	0	1	1	0	1	0	1	0
K01581	Amino acid metabolism	E4.1.1.17, ODC1, speC, speF; ornithine decarboxylase [EC:4.1.1.17]	1	1	1	1	1	1	1	1	1	1	1	0	1	1	1	1	1	1	2	1	1	1	1	1	1	1	1	1	1	1	1
K01584	Amino acid metabolism	adiA; arginine decarboxylase [EC:4.1.1.19]	0	0	0	0	0	0	0	0	0	0	0	0	0	0	0	0	0	0	0	0	1	0	0	0	0	0	0	0	0	0	0
K01585	Amino acid metabolism	speA; arginine decarboxylase [EC:4.1.1.19]	1	1	1	2	1	1	1	1	2	1	1	1	1	1	1	1	1	2	1	1	1	1	1	2	1	1	0	1	1	0	1
K01586	Amino acid metabolism	lysA; diaminopimelate decarboxylase [EC:4.1.1.20]	1	1	1	2	1	1	1	1	2	1	1	1	1	1	1	1	1	2	2	1	1	1	1	2	1	1	0	1	1	0	1
K01587	Nucleotide metabolism	PAICS; phosphoribosylaminoimidazole carboxylase / phosphoribosylaminoimidazole-succinocarboxamide synthase [EC:4.1.1.21 6.3.2.6]	0	0	0	0	0	1	0	0	0	0	0	0	0	0	0	0	0	0	0	0	0	0	0	0	0	0	0	0	0	0	0
K01588	Nucleotide metabolism	purE; 5-(carboxyamino)imidazole ribonucleotide mutase [EC:5.4.99.18]	1	1	1	1	1	1	1	1	1	1	1	0	1	1	0	1	1	1	1	1	1	1	1	0	1	1	0	1	1	1	1
K01589	Nucleotide metabolism	purK; 5-(carboxyamino)imidazole ribonucleotide synthase [EC:6.3.4.18]	1	1	1	1	1	1	1	1	0	0	1	0	1	0	0	0	0	0	0	0	1	1	0	0	0	0	0	0	0	0	0
K01591	Nucleotide metabolism	pyrF; orotidine-5'-phosphate decarboxylase [EC:4.1.1.23]	1	1	1	1	1	2	1	1	1	1	1	1	1	1	1	1	1	1	1	1	1	1	1	1	1	1	0	1	1	1	1
K01591	Nucleotide metabolism	pyrF; orotidine-5'-phosphate decarboxylase [EC:4.1.1.23]	1	1	1	1	1	2	1	1	1	1	1	1	1	1	1	1	1	1	1	1	1	1	1	1	1	1	0	1	1	1	1
K01595	Carbohydrate metabolism	ppc; phosphoenolpyruvate carboxylase [EC:4.1.1.31]	1	1	1	3	0	0	0	0	0	0	1	0	1	0	0	0	0	0	0	0	0	0	0	0	0	0	0	0	0	0	0
K01596	Carbohydrate metabolism	E4.1.1.32, pckA, PCK; phosphoenolpyruvate carboxykinase (GTP) [EC:4.1.1.32]	0	0	0	1	0	1	0	0	0	0	1	0	1	0	0	0	0	0	0	0	0	0	0	0	0	0	0	0	0	0	0
K01598	Metabolism of cofactors and vitamins	PPCDC, coaC; phosphopantothenoylcysteine decarboxylase [EC:4.1.1.36]	1	1	1	1	1	1	1	1	1	1	1	1	1	1	1	1	2	1	1	1	1	1	1	1	1	1	1	1	1	1	1
K01599	Metabolism of cofactors and vitamins	hemE, UROD; uroporphyrinogen decarboxylase [EC:4.1.1.37]	9	8	10	12	7	7	9	9	12	11	11	4	4	15	7	7	11	10	5	11	9	14	12	13	17	16	5	9	13	12	13
K01607	Xenobiotics biodegradation and metabolism	pcaC; 4-carboxymuconolactone decarboxylase [EC:4.1.1.44]	1	1	1	1	1	1	1	0	0	0	1	0	1	0	0	0	0	0	1	0	0	0	3	3	3	2	0	3	2	3	3
K01609	Amino acid metabolism	trpC; indole-3-glycerol phosphate synthase [EC:4.1.1.48]	1	1	1	1	1	1	1	1	1	1	1	0	1	1	1	1	1	1	1	1	1	1	0	1	1	1	0	0	2	1	1
K01610	Carbohydrate metabolism	E4.1.1.49, pckA; phosphoenolpyruvate carboxykinase (ATP) [EC:4.1.1.49]	0	0	0	1	0	1	0	1	1	1	1	1	1	0	1	1	1	1	0	1	1	1	1	1	1	1	1	1	1	1	1
K01610	Carbohydrate metabolism	E4.1.1.49, pckA; phosphoenolpyruvate carboxykinase (ATP) [EC:4.1.1.49]	0	0	0	1	0	1	0	1	1	1	1	1	1	0	1	1	1	1	0	1	1	1	1	1	1	1	1	1	1	1	1
K01611	Amino acid metabolism	speD, AMD1; S-adenosylmethionine decarboxylase [EC:4.1.1.50]	2	2	2	3	2	2	2	2	2	2	2	1	2	2	1	2	1	2	1	2	2	2	2	2	2	2	1	2	2	2	1
K01611	Amino acid metabolism	speD, AMD1; S-adenosylmethionine decarboxylase [EC:4.1.1.50]	2	2	2	3	2	2	2	2	2	2	2	1	2	2	1	2	1	2	1	2	2	2	2	2	2	2	1	2	2	2	1
K01615	Carbohydrate metabolism	gcdA; glutaconyl-CoA decarboxylase subunit alpha [EC:7.2.4.5]	0	0	0	0	0	0	1	0	0	0	0	0	0	0	0	0	0	0	0	0	0	0	0	0	0	0	0	0	0	0	0
K01619	Carbohydrate metabolism	deoC, DERA; deoxyribose-phosphate aldolase [EC:4.1.2.4]	3	4	4	3	3	2	3	3	2	2	2	1	4	2	1	1	1	2	2	2	2	2	3	3	3	3	3	2	5	3	4
K01619	Carbohydrate metabolism	deoC, DERA; deoxyribose-phosphate aldolase [EC:4.1.2.4]	3	4	4	3	3	2	3	3	2	2	2	1	4	2	1	1	1	2	2	2	2	2	3	3	3	3	3	2	5	3	4
K01620	Amino acid metabolism	ltaE; threonine aldolase [EC:4.1.2.48]	1	1	1	1	1	1	1	2	3	3	2	2	0	3	3	3	3	3	2	3	3	3	3	3	4	3	3	3	2	3	3
K01624	Carbohydrate metabolism	FBA, fbaA; fructose-bisphosphate aldolase, class II [EC:4.1.2.13]	3	3	3	3	3	3	3	5	3	3	3	1	3	4	3	3	4	1	2	3	4	2	4	5	6	5	2	5	3	5	5
K01625	Carbohydrate metabolism	eda; 2-dehydro-3-deoxyphosphogluconate aldolase / (4S)-4-hydroxy-2-oxoglutarate aldolase [EC:4.1.2.14 4.1.3.42]	1	1	2	1	1	1	1	1	2	1	2	1	0	1	1	1	2	1	2	1	1	1	1	1	1	1	1	1	2	1	1
K01628	Carbohydrate metabolism	fucA; L-fuculose-phosphate aldolase [EC:4.1.2.17]	2	2	3	4	3	2	3	3	1	1	2	0	3	2	0	1	1	0	0	1	2	2	2	3	5	2	3	2	4	2	2
K01629	Carbohydrate metabolism	rhaD; rhamnulose-1-phosphate aldolase [EC:4.1.2.19]	1	1	1	1	1	1	1	1	0	0	1	0	1	0	0	0	0	0	0	0	0	0	1	1	1	1	0	1	1	1	1
K01630	Carbohydrate metabolism	garL; 2-dehydro-3-deoxyglucarate aldolase [EC:4.1.2.20]	0	0	0	0	0	0	1	1	1	1	1	1	0	1	0	1	2	1	1	1	0	0	1	1	1	1	0	1	1	1	1
K01630	Carbohydrate metabolism	garL; 2-dehydro-3-deoxyglucarate aldolase [EC:4.1.2.20]	0	0	0	0	0	0	1	1	1	1	1	1	0	1	0	1	2	1	1	1	0	0	1	1	1	1	0	1	1	1	1
K01633	Metabolism of cofactors and vitamins	folB; 7,8-dihydroneopterin aldolase/epimerase/oxygenase [EC:4.1.2.25 5.1.99.8 1.13.11.81]	0	0	0	0	0	0	0	0	0	0	0	0	0	0	0	0	0	0	0	0	0	0	0	1	0	0	0	0	0	0	0
K01639	Carbohydrate metabolism	E4.1.3.3, nanA, NPL; N-acetylneuraminate lyase [EC:4.1.3.3]	0	0	0	0	0	0	0	0	0	0	0	0	0	0	0	0	0	0	0	0	0	0	0	0	0	0	1	0	0	0	0
K01649	Carbohydrate metabolism	leuA, IMS; 2-isopropylmalate synthase [EC:2.3.3.13]	2	2	2	2	2	2	3	2	2	2	2	2	3	2	2	2	2	2	0	2	2	2	2	3	2	2	2	4	2	2	2
K01652	Carbohydrate metabolism	E2.2.1.6L, ilvB, ilvG, ilvI; acetolactate synthase I/II/III large subunit [EC:2.2.1.6]	1	1	1	1	1	1	1	1	2	2	2	0	2	2	1	3	1	2	0	2	1	1	1	1	2	2	2	2	1	3	2
K01653	Carbohydrate metabolism	E2.2.1.6S, ilvH, ilvN; acetolactate synthase I/III small subunit [EC:2.2.1.6]	1	1	1	1	1	1	1	1	1	1	1	0	1	1	1	1	1	1	0	1	1	1	1	1	1	1	1	1	1	1	1
K01657	Amino acid metabolism	trpE; anthranilate synthase component I [EC:4.1.3.27]	1	1	1	1	1	1	1	1	1	1	1	0	0	0	2	1	1	1	1	1	1	1	1	1	1	1	0	0	1	1	1
K01658	Amino acid metabolism	trpG; anthranilate synthase component II [EC:4.1.3.27]	2	2	2	2	1	2	2	2	1	1	2	0	0	0	1	1	1	1	1	1	1	2	2	1	2	1	0	0	2	2	1
K01658	Amino acid metabolism	trpG; anthranilate synthase component II [EC:4.1.3.27]	2	2	2	2	1	2	2	2	1	1	2	0	0	0	1	1	1	1	1	1	1	2	2	1	2	1	0	0	2	2	1
K01663	Amino acid metabolism	HIS7; imidazole glycerol-phosphate synthase [EC:4.3.2.10]	0	0	0	0	0	0	1	0	0	0	0	0	0	0	0	0	0	0	0	0	1	1	1	0	1	1	1	1	1	1	1
K01664	Metabolism of cofactors and vitamins	pabA; para-aminobenzoate synthetase component II [EC:2.6.1.85]	2	2	2	2	1	2	2	2	1	1	1	0	0	0	1	1	1	1	1	1	1	2	2	1	2	1	0	0	2	2	1
K01666	Amino acid metabolism	mhpE; 4-hydroxy 2-oxovalerate aldolase [EC:4.1.3.39]	0	0	0	0	0	0	0	0	0	0	0	0	0	0	0	0	0	0	0	0	0	0	0	0	0	1	0	0	2	1	0
K01669	Protein families: genetic information processing	phr, PHR1; deoxyribodipyrimidine photo-lyase [EC:4.1.99.3]	1	1	1	2	1	1	1	1	0	0	1	0	1	0	0	0	0	0	0	0	1	1	1	1	1	1	0	1	1	1	1
K01676	Carbohydrate metabolism	E4.2.1.2A, fumA, fumB; fumarate hydratase, class I [EC:4.2.1.2]	0	0	0	0	0	0	0	1	1	1	0	0	0	1	1	1	1	1	1	1	0	0	0	1	0	0	0	0	0	0	0
K01677	Carbohydrate metabolism	E4.2.1.2AA, fumA; fumarate hydratase subunit alpha [EC:4.2.1.2]	1	1	1	1	1	1	1	1	1	1	1	0	1	1	1	1	1	1	1	2	1	1	1	1	1	1	0	1	1	1	1
K01678	Carbohydrate metabolism	E4.2.1.2AB, fumB; fumarate hydratase subunit beta [EC:4.2.1.2]	1	1	1	1	1	1	1	1	1	1	1	0	1	1	1	1	1	1	1	1	1	1	1	1	1	1	0	1	1	1	1
K01678	Carbohydrate metabolism	E4.2.1.2AB, fumB; fumarate hydratase subunit beta [EC:4.2.1.2]	1	1	1	1	1	1	1	1	1	1	1	0	1	1	1	1	1	1	1	1	1	1	1	1	1	1	0	1	1	1	1
K01684	Carbohydrate metabolism	dgoD; galactonate dehydratase [EC:4.2.1.6]	0	0	0	0	0	0	0	0	0	0	0	1	0	0	0	0	0	0	1	0	0	0	0	0	0	1	0	0	0	0	0
K01686	Carbohydrate metabolism	uxuA; mannonate dehydratase [EC:4.2.1.8]	0	1	1	1	1	0	0	1	1	1	0	1	1	1	2	1	1	1	0	1	0	1	1	1	1	1	1	1	1	1	1
K01687	Amino acid metabolism	ilvD; dihydroxy-acid dehydratase [EC:4.2.1.9]	1	1	1	1	1	1	1	1	1	1	1	0	1	1	1	3	1	1	0	1	1	1	1	2	1	2	1	1	1	2	1
K01689	Carbohydrate metabolism	ENO, eno; enolase [EC:4.2.1.11]	1	1	1	1	1	1	1	1	2	2	1	1	2	1	1	1	1	1	1	1	1	1	1	1	1	1	0	2	1	1	1
K01693	Amino acid metabolism	hisB; imidazoleglycerol-phosphate dehydratase [EC:4.2.1.19]	1	1	1	1	1	1	1	1	1	1	1	0	1	1	1	1	1	1	1	1	1	1	1	1	1	1	1	1	1	1	1
K01695	Amino acid metabolism	trpA; tryptophan synthase alpha chain [EC:4.2.1.20]	1	1	2	1	1	1	1	1	1	1	2	2	1	1	1	1	2	1	0	1	1	1	1	1	1	1	2	1	1	1	1
K01696	Amino acid metabolism	trpB; tryptophan synthase beta chain [EC:4.2.1.20]	2	2	2	2	2	2	2	2	2	2	2	2	2	2	1	2	2	4	2	2	2	2	2	2	2	3	2	2	2	2	2
K01697	Amino acid metabolism	CBS; cystathionine beta-synthase [EC:4.2.1.22]	0	0	0	0	0	0	0	0	1	1	0	0	0	1	0	1	1	1	0	1	0	0	0	0	0	0	0	0	0	0	0
K01698	Metabolism of cofactors and vitamins	hemB, ALAD; porphobilinogen synthase [EC:4.2.1.24]	1	1	1	1	1	1	1	0	0	0	0	0	1	0	0	0	0	0	0	0	0	0	0	0	1	0	0	0	0	0	1
K01703	Carbohydrate metabolism	leuC, IPMI-L; 3-isopropylmalate/(R)-2-methylmalate dehydratase large subunit [EC:4.2.1.33 4.2.1.35]	2	2	2	2	2	2	2	1	2	2	2	0	2	2	3	3	2	2	1	2	2	2	2	3	2	2	2	2	2	2	2
K01704	Carbohydrate metabolism	leuD, IPMI-S; 3-isopropylmalate/(R)-2-methylmalate dehydratase small subunit [EC:4.2.1.33 4.2.1.35]	2	2	2	2	2	2	2	1	2	2	2	0	3	2	2	3	2	2	1	2	2	2	2	2	2	2	2	2	2	2	2
K01710	Glycan biosynthesis and metabolism	rfbB, rmlB, rffG; dTDP-glucose 4,6-dehydratase [EC:4.2.1.46]	0	0	3	0	2	0	2	1	1	1	1	0	1	1	1	1	0	0	1	1	1	1	2	1	2	1	0	0	0	0	0
K01711	Carbohydrate metabolism	gmd, GMDS; GDPmannose 4,6-dehydratase [EC:4.2.1.47]	0	0	0	0	0	0	0	0	0	0	0	0	0	0	0	0	0	0	0	0	0	0	0	0	0	0	1	0	0	0	0
K01714	Amino acid metabolism	dapA; 4-hydroxy-tetrahydrodipicolinate synthase [EC:4.3.3.7]	3	3	3	3	2	3	3	4	3	2	2	2	2	2	2	1	2	2	2	2	5	4	3	2	3	1	1	3	3	1	3
K01714	Amino acid metabolism	dapA; 4-hydroxy-tetrahydrodipicolinate synthase [EC:4.3.3.7]	3	3	3	3	2	3	3	4	3	2	2	2	2	2	2	1	2	2	2	2	5	4	3	2	3	1	1	3	3	1	3
K01719	Metabolism of cofactors and vitamins	hemD, UROS; uroporphyrinogen-III synthase [EC:4.2.1.75]	1	1	1	1	1	1	1	1	0	0	0	0	1	0	0	0	0	0	0	0	0	0	1	1	3	1	0	1	1	1	3
K01728	Carbohydrate metabolism	pel; pectate lyase [EC:4.2.2.2]	0	0	0	0	0	0	0	0	0	1	0	0	0	1	0	0	1	0	0	1	0	0	0	0	0	0	0	0	0	0	0
K01729	Carbohydrate metabolism	algL; poly(beta-D-mannuronate) lyase [EC:4.2.2.3]	0	0	0	0	0	0	0	1	0	0	0	0	0	0	0	0	0	0	0	0	0	0	0	0	0	0	0	0	0	0	0
K01733	Amino acid metabolism	thrC; threonine synthase [EC:4.2.3.1]	1	1	1	1	1	1	1	1	2	2	1	1	0	2	2	2	2	2	0	2	1	1	1	1	1	1	1	1	1	1	1
K01733	Amino acid metabolism	thrC; threonine synthase [EC:4.2.3.1]	1	1	1	1	1	1	1	1	2	2	1	1	0	2	2	2	2	2	0	2	1	1	1	1	1	1	1	1	1	1	1
K01734	Carbohydrate metabolism	mgsA; methylglyoxal synthase [EC:4.2.3.3]	1	1	1	1	1	0	0	0	1	3	1	0	1	2	0	2	1	2	0	3	1	1	1	1	1	0	0	1	0	1	1
K01735	Amino acid metabolism	aroB; 3-dehydroquinate synthase [EC:4.2.3.4]	1	1	1	1	1	1	1	2	1	1	1	1	1	1	1	1	1	1	0	1	1	1	1	1	1	1	0	1	1	1	1
K01736	Amino acid metabolism	aroC; chorismate synthase [EC:4.2.3.5]	1	1	1	1	1	1	1	1	1	1	1	1	1	1	1	1	1	1	1	1	1	1	1	1	1	1	0	1	1	1	1
K01738	Energy metabolism	cysK; cysteine synthase [EC:2.5.1.47]	1	1	2	0	1	1	1	1	1	1	1	0	2	1	1	2	1	1	1	1	1	1	1	2	1	1	1	1	0	1	1
K01744	Amino acid metabolism	aspA; aspartate ammonia-lyase [EC:4.3.1.1]	1	1	1	1	1	1	1	1	0	1	1	0	1	1	0	1	1	1	0	1	1	1	0	0	2	0	0	0	0	0	0
K01749	Metabolism of cofactors and vitamins	hemC, HMBS; hydroxymethylbilane synthase [EC:2.5.1.61]	1	1	1	1	1	1	1	0	0	0	0	0	1	0	0	0	0	0	0	0	0	0	0	0	1	0	0	0	0	0	1
K01754	Amino acid metabolism	E4.3.1.19, ilvA, tdcB; threonine dehydratase [EC:4.3.1.19]	0	0	0	1	0	0	0	0	0	0	0	0	0	0	0	0	0	0	0	0	0	0	0	0	1	0	0	0	0	0	0
K01755	Amino acid metabolism	argH, ASL; argininosuccinate lyase [EC:4.3.2.1]	1	1	1	1	1	1	1	1	1	1	1	2	1	1	2	1	1	1	1	1	1	1	1	1	1	1	0	1	1	1	1
K01756	Nucleotide metabolism	purB, ADSL; adenylosuccinate lyase [EC:4.3.2.2]	1	1	1	1	1	2	1	0	1	1	1	0	2	1	0	1	1	1	1	1	1	1	1	1	1	1	1	1	1	2	1
K01756	Nucleotide metabolism	purB, ADSL; adenylosuccinate lyase [EC:4.3.2.2]	1	1	1	1	1	2	1	0	1	1	1	0	2	1	0	1	1	1	1	1	1	1	1	1	1	1	1	1	1	2	1
K01758	Amino acid metabolism	CTH; cystathionine gamma-lyase [EC:4.4.1.1]	0	0	0	0	0	0	0	0	0	0	0	1	0	0	0	0	0	0	0	0	0	0	1	0	1	0	0	0	1	1	1
K01759	Carbohydrate metabolism	GLO1, gloA; lactoylglutathione lyase [EC:4.4.1.5]	1	1	0	0	1	0	1	0	1	1	1	0	1	1	1	1	1	0	1	1	1	1	0	0	0	0	0	0	0	0	0
K01760	Amino acid metabolism	metC; cysteine-S-conjugate beta-lyase [EC:4.4.1.13]	0	0	0	0	0	0	0	0	0	0	0	1	0	0	0	0	0	0	0	0	0	0	1	0	1	0	0	0	1	1	1
K01761	Amino acid metabolism	E4.4.1.11; methionine-gamma-lyase [EC:4.4.1.11]	0	0	0	0	0	0	0	0	0	0	0	1	0	0	0	0	0	0	0	0	0	0	1	0	1	0	0	0	1	1	1
K01768	Nucleotide metabolism	E4.6.1.1; adenylate cyclase [EC:4.6.1.1]	1	2	3	1	4	1	1	1	1	1	2	0	1	1	0	1	1	1	0	1	2	2	1	1	2	2	1	2	1	2	2
K01768	Nucleotide metabolism	E4.6.1.1; adenylate cyclase [EC:4.6.1.1]	1	2	3	1	4	1	1	1	1	1	2	0	1	1	0	1	1	1	0	1	2	2	1	1	2	2	1	2	1	2	2
K01770	Metabolism of terpenoids and polyketides	ispF; 2-C-methyl-D-erythritol 2,4-cyclodiphosphate synthase [EC:4.6.1.12]	2	2	2	2	3	2	2	2	2	2	2	1	2	2	2	2	2	3	1	2	2	2	2	2	2	2	2	2	1	2	3
K01770	Metabolism of terpenoids and polyketides	ispF; 2-C-methyl-D-erythritol 2,4-cyclodiphosphate synthase [EC:4.6.1.12]	2	2	2	2	3	2	2	2	2	2	2	1	2	2	2	2	2	3	1	2	2	2	2	2	2	2	2	2	1	2	3
K01771	Carbohydrate metabolism	plc; 1-phosphatidylinositol phosphodiesterase [EC:4.6.1.13]	0	0	0	0	0	0	0	0	0	0	0	0	0	0	0	0	0	0	0	0	0	0	0	0	0	0	0	1	0	0	0
K01775	Metabolism of other amino acids	alr; alanine racemase [EC:5.1.1.1]	5	3	3	4	5	3	5	3	3	2	2	0	3	3	1	1	4	3	3	2	3	5	3	1	3	4	1	3	3	3	3
K01775	Metabolism of other amino acids	alr; alanine racemase [EC:5.1.1.1]	5	3	3	4	5	3	5	3	3	2	2	0	3	3	1	1	4	3	3	2	3	5	3	1	3	4	1	3	3	3	3
K01776	Metabolism of other amino acids	murI; glutamate racemase [EC:5.1.1.3]	2	2	2	1	1	2	2	2	2	2	2	2	2	2	2	2	2	2	3	2	2	2	2	2	1	2	1	2	1	2	2
K01776	Metabolism of other amino acids	murI; glutamate racemase [EC:5.1.1.3]	2	2	2	1	1	2	2	2	2	2	2	2	2	2	2	2	2	2	3	2	2	2	2	2	1	2	1	2	1	2	2
K01778	Amino acid metabolism	dapF; diaminopimelate epimerase [EC:5.1.1.7]	1	1	2	1	1	1	1	1	1	1	1	1	1	1	1	1	1	1	1	1	1	1	1	1	1	1	0	1	1	1	1
K01781	Xenobiotics biodegradation and metabolism	mdlA; mandelate racemase [EC:5.1.2.2]	0	0	0	0	0	0	0	0	0	0	0	0	0	0	0	0	0	0	0	0	0	0	0	0	0	1	0	0	0	0	0
K01783	Carbohydrate metabolism	rpe, RPE; ribulose-phosphate 3-epimerase [EC:5.1.3.1]	3	5	4	4	3	4	5	4	2	2	3	1	3	2	2	2	2	1	1	2	3	3	3	3	3	3	3	3	3	3	3
K01784	Carbohydrate metabolism	galE, GALE; UDP-glucose 4-epimerase [EC:5.1.3.2]	2	2	3	2	2	2	3	2	2	3	2	0	2	2	2	3	3	2	2	3	2	2	2	2	3	3	1	2	1	3	2
K01784	Carbohydrate metabolism	galE, GALE; UDP-glucose 4-epimerase [EC:5.1.3.2]	2	2	3	2	2	2	3	2	2	3	2	0	2	2	2	3	3	2	2	3	2	2	2	2	3	3	1	2	1	3	2
K01785	Carbohydrate metabolism	galM, GALM; aldose 1-epimerase [EC:5.1.3.3]	1	1	1	2	1	1	1	1	2	1	0	2	0	1	0	0	2	1	0	1	1	1	0	0	0	0	0	0	0	0	0
K01787	Carbohydrate metabolism	RENBP; N-acylglucosamine 2-epimerase [EC:5.1.3.8]	0	0	0	0	0	0	0	0	0	1	0	0	0	0	0	1	0	1	0	0	0	0	1	0	1	0	0	1	1	1	1
K01790	Glycan biosynthesis and metabolism	rfbC, rmlC; dTDP-4-dehydrorhamnose 3,5-epimerase [EC:5.1.3.13]	0	0	0	0	1	0	1	1	0	1	1	0	0	1	1	1	0	0	1	1	1	1	0	0	0	0	0	0	0	0	0
K01791	Carbohydrate metabolism	wecB; UDP-N-acetylglucosamine 2-epimerase (non-hydrolysing) [EC:5.1.3.14]	1	2	1	2	1	1	3	1	1	1	1	0	1	1	1	1	2	1	3	1	1	1	1	1	1	2	1	1	1	1	1
K01795	Carbohydrate metabolism	algG; mannuronan 5-epimerase [EC:5.1.3.37]	1	1	1	1	0	0	0	2	0	0	0	0	2	0	0	0	0	0	0	0	0	0	0	0	0	0	0	0	0	0	0
K01802	Unclassified: metabolism	E5.2.1.8; peptidylprolyl isomerase [EC:5.2.1.8]	1	1	1	1	2	1	1	2	1	1	1	1	0	1	1	1	2	1	1	1	1	1	1	1	1	1	0	1	1	1	1
K01803	Carbohydrate metabolism	TPI, tpiA; triosephosphate isomerase (TIM) [EC:5.3.1.1]	2	2	2	1	2	2	2	1	1	1	2	1	2	1	1	1	0	1	2	1	1	1	2	3	3	2	1	2	2	1	3
K01803	Carbohydrate metabolism	TPI, tpiA; triosephosphate isomerase (TIM) [EC:5.3.1.1]	2	2	2	1	2	2	2	1	1	1	2	1	2	1	1	1	0	1	2	1	1	1	2	3	3	2	1	2	2	1	3
K01804	Carbohydrate metabolism	araA; L-arabinose isomerase [EC:5.3.1.4]	0	0	0	0	0	0	1	0	0	0	0	0	0	0	0	0	0	0	0	0	0	0	0	0	0	0	0	0	0	0	0
K01805	Carbohydrate metabolism	xylA; xylose isomerase [EC:5.3.1.5]	2	2	5	3	3	2	5	3	4	3	3	4	2	2	1	2	1	1	3	3	3	3	4	5	4	7	4	4	6	4	4
K01808	Carbohydrate metabolism	rpiB; ribose 5-phosphate isomerase B [EC:5.3.1.6]	3	4	5	6	4	2	4	4	3	3	2	2	3	3	2	3	4	2	3	3	3	4	3	3	3	3	3	3	3	1	4
K01808	Carbohydrate metabolism	rpiB; ribose 5-phosphate isomerase B [EC:5.3.1.6]	3	4	5	6	4	2	4	4	3	3	2	2	3	3	2	3	4	2	3	3	3	4	3	3	3	3	3	3	3	1	4
K01809	Carbohydrate metabolism	manA, MPI; mannose-6-phosphate isomerase [EC:5.3.1.8]	0	2	1	1	0	1	0	0	1	1	0	0	0	1	0	1	2	1	0	1	1	1	1	1	2	0	1	1	1	0	1
K01809	Carbohydrate metabolism	manA, MPI; mannose-6-phosphate isomerase [EC:5.3.1.8]	0	2	1	1	0	1	0	0	1	1	0	0	0	1	0	1	2	1	0	1	1	1	1	1	2	0	1	1	1	0	1
K01810	Carbohydrate metabolism	GPI, pgi; glucose-6-phosphate isomerase [EC:5.3.1.9]	1	1	1	2	1	1	2	2	1	1	1	0	1	1	0	0	1	0	0	1	2	1	1	0	1	1	0	1	0	1	1
K01810	Carbohydrate metabolism	GPI, pgi; glucose-6-phosphate isomerase [EC:5.3.1.9]	1	1	1	2	1	1	2	2	1	1	1	0	1	1	0	0	1	0	0	1	2	1	1	0	1	1	0	1	0	1	1
K01811	Unclassified: metabolism	xylS, yicI; alpha-D-xyloside xylohydrolase [EC:3.2.1.177]	1	1	1	3	1	1	1	1	1	1	1	0	1	1	0	0	2	0	0	1	2	2	0	0	0	0	0	0	0	0	0
K01812	Carbohydrate metabolism	uxaC; glucuronate isomerase [EC:5.3.1.12]	1	1	1	1	1	1	1	0	1	1	1	0	1	1	0	0	1	0	1	1	1	1	1	0	1	1	0	1	1	1	1
K01814	Amino acid metabolism	hisA; phosphoribosylformimino-5-aminoimidazole carboxamide ribotide isomerase [EC:5.3.1.16]	2	2	2	2	2	2	2	1	2	2	2	2	2	2	2	2	2	2	2	2	2	2	2	2	2	2	2	2	2	2	2
K01814	Amino acid metabolism	hisA; phosphoribosylformimino-5-aminoimidazole carboxamide ribotide isomerase [EC:5.3.1.16]	2	2	2	2	2	2	2	1	2	2	2	2	2	2	2	2	2	2	2	2	2	2	2	2	2	2	2	2	2	2	2
K01816	Carbohydrate metabolism	hyi, gip; hydroxypyruvate isomerase [EC:5.3.1.22]	0	0	0	2	0	1	0	0	0	0	0	0	0	0	0	0	0	0	0	0	1	1	1	1	2	1	1	1	1	1	1
K01817	Amino acid metabolism	trpF; phosphoribosylanthranilate isomerase [EC:5.3.1.24]	2	1	1	1	2	2	2	2	3	3	1	0	1	3	2	3	3	3	1	3	2	2	0	1	2	1	1	0	2	2	2
K01817	Amino acid metabolism	trpF; phosphoribosylanthranilate isomerase [EC:5.3.1.24]	2	1	1	1	2	2	2	2	3	3	1	0	1	3	2	3	3	3	1	3	2	2	0	1	2	1	1	0	2	2	2
K01818	Carbohydrate metabolism	fucI; L-fucose/D-arabinose isomerase [EC:5.3.1.25 5.3.1.3]	2	1	2	2	2	1	2	1	1	1	1	0	1	1	1	0	1	1	0	1	1	1	1	1	1	2	1	1	1	1	1
K01819	Carbohydrate metabolism	E5.3.1.26, lacA, lacB; galactose-6-phosphate isomerase [EC:5.3.1.26]	0	0	0	1	0	1	1	1	1	1	0	0	0	1	0	1	1	1	1	1	0	0	0	0	0	0	0	0	0	0	0
K01821	Xenobiotics biodegradation and metabolism	praC, xylH; 4-oxalocrotonate tautomerase [EC:5.3.2.6]	0	0	0	0	0	0	0	0	1	1	0	0	0	0	0	1	1	1	0	2	0	0	0	0	0	0	0	0	0	0	0
K01834	Carbohydrate metabolism	PGAM, gpmA; 2,3-bisphosphoglycerate-dependent phosphoglycerate mutase [EC:5.4.2.11]	0	0	0	0	0	0	0	0	0	0	0	0	0	0	0	0	0	0	0	0	0	0	1	2	1	1	0	1	0	1	1
K01835	Carbohydrate metabolism	pgm; phosphoglucomutase [EC:5.4.2.2]	1	1	2	1	1	1	1	1	1	1	1	0	1	1	1	1	1	0	0	1	1	1	1	1	1	1	1	1	1	1	1
K01839	Carbohydrate metabolism	deoB; phosphopentomutase [EC:5.4.2.7]	1	1	1	1	1	1	1	1	1	1	1	1	2	1	1	1	1	1	0	1	1	1	1	1	1	1	1	1	1	1	1
K01840	Carbohydrate metabolism	manB; phosphomannomutase [EC:5.4.2.8]	2	2	3	2	2	2	2	3	2	2	2	0	2	2	1	2	2	0	0	2	2	2	2	2	1	2	3	2	1	1	2
K01843	Amino acid metabolism	kamA; lysine 2,3-aminomutase [EC:5.4.3.2]	0	0	0	0	0	0	0	0	0	0	0	0	0	0	0	0	0	0	0	0	0	0	0	0	0	0	0	0	0	1	0
K01844	Amino acid metabolism	kamD; beta-lysine 5,6-aminomutase alpha subunit [EC:5.4.3.3]	0	0	0	0	0	0	0	0	0	0	0	1	0	0	0	0	0	0	0	0	0	0	0	0	0	0	0	0	1	1	0
K01845	Metabolism of cofactors and vitamins	hemL; glutamate-1-semialdehyde 2,1-aminomutase [EC:5.4.3.8]	1	1	1	1	1	2	3	0	0	0	0	0	1	0	0	0	0	0	0	0	0	0	0	0	2	0	0	0	0	0	2
K01854	Carbohydrate metabolism	glf; UDP-galactopyranose mutase [EC:5.4.99.9]	0	0	0	1	0	0	0	0	0	0	0	0	0	0	0	0	0	0	0	0	0	0	0	0	0	0	0	0	0	0	0
K01866	Translation	YARS, tyrS; tyrosyl-tRNA synthetase [EC:6.1.1.1]	1	1	1	1	1	1	1	1	0	1	0	1	1	1	1	1	1	1	1	1	1	1	1	1	1	1	1	1	1	1	1
K01867	Translation	WARS, trpS; tryptophanyl-tRNA synthetase [EC:6.1.1.2]	1	1	1	1	1	1	1	1	1	1	1	0	1	1	1	1	1	1	1	1	1	1	1	1	1	1	0	1	1	2	1
K01868	Translation	TARS, thrS; threonyl-tRNA synthetase [EC:6.1.1.3]	1	1	4	1	1	1	1	1	1	1	0	0	1	1	0	1	1	1	1	1	2	1	1	0	1	1	0	1	0	1	1
K01869	Translation	LARS, leuS; leucyl-tRNA synthetase [EC:6.1.1.4]	1	1	1	2	1	1	1	1	1	1	2	1	1	1	1	1	1	1	1	1	1	1	1	1	1	1	1	1	2	2	1
K01870	Translation	IARS, ileS; isoleucyl-tRNA synthetase [EC:6.1.1.5]	1	1	1	1	1	1	1	1	1	1	1	1	1	1	1	1	1	1	1	1	1	1	1	1	1	1	1	1	1	1	1
K01872	Translation	AARS, alaS; alanyl-tRNA synthetase [EC:6.1.1.7]	1	1	1	1	1	1	2	2	1	1	1	2	1	1	1	1	1	1	0	1	1	1	1	2	1	1	1	1	1	1	1
K01873	Translation	VARS, valS; valyl-tRNA synthetase [EC:6.1.1.9]	1	1	3	1	1	1	1	1	1	1	1	1	1	1	1	1	1	1	1	1	1	1	1	2	1	1	1	1	1	2	1
K01874	Metabolism of other amino acids	MARS, metG; methionyl-tRNA synthetase [EC:6.1.1.10]	2	2	2	2	2	2	2	2	2	2	2	2	2	2	2	3	3	2	2	2	2	2	2	2	2	2	1	2	3	2	2
K01875	Translation	SARS, serS; seryl-tRNA synthetase [EC:6.1.1.11]	1	1	1	1	1	1	1	1	1	1	1	0	1	1	1	2	1	2	1	1	1	1	1	1	1	1	0	1	0	1	1
K01876	Translation	DARS2, aspS; aspartyl-tRNA synthetase [EC:6.1.1.12]	2	2	3	2	2	2	2	3	2	2	2	2	2	2	2	2	3	2	1	2	2	2	2	2	2	2	2	2	2	3	2
K01878	Translation	glyQ; glycyl-tRNA synthetase alpha chain [EC:6.1.1.14]	1	1	1	1	1	1	1	1	1	1	1	0	1	1	1	1	1	1	1	1	1	1	1	1	1	1	1	1	1	1	1
K01879	Translation	glyS; glycyl-tRNA synthetase beta chain [EC:6.1.1.14]	1	1	1	1	1	1	1	2	1	1	1	2	1	1	1	2	1	1	1	2	1	1	1	1	1	1	1	1	1	1	1
K01880	Translation	GARS, glyS1; glycyl-tRNA synthetase [EC:6.1.1.14]	0	0	0	0	0	0	0	0	0	0	0	0	0	0	0	0	0	0	0	0	0	0	0	0	0	0	0	0	0	1	0
K01881	Translation	PARS, proS; prolyl-tRNA synthetase [EC:6.1.1.15]	1	1	1	1	1	1	1	1	1	1	1	1	1	1	1	1	1	1	0	1	1	1	1	1	1	1	1	1	1	2	1
K01883	Translation	CARS, cysS; cysteinyl-tRNA synthetase [EC:6.1.1.16]	1	1	1	1	1	1	1	1	1	1	1	1	1	1	1	1	1	2	0	1	1	1	1	1	1	1	0	1	1	1	1
K01884	Translation	cysS1; cysteinyl-tRNA synthetase, unknown class [EC:6.1.1.16]	0	0	0	0	1	0	1	0	0	0	0	0	0	0	0	0	0	0	0	0	0	0	1	0	2	1	0	1	1	0	1
K01885	Metabolism of cofactors and vitamins	EARS, gltX; glutamyl-tRNA synthetase [EC:6.1.1.17]	2	2	2	2	2	2	2	3	2	2	2	3	2	2	2	2	2	4	1	2	2	2	1	3	1	1	0	1	1	1	1
K01886	Translation	QARS, glnS; glutaminyl-tRNA synthetase [EC:6.1.1.18]	0	0	0	0	0	0	0	0	0	0	0	0	0	0	0	0	0	0	0	0	0	0	1	1	1	1	1	1	1	0	2
K01887	Translation	RARS, argS; arginyl-tRNA synthetase [EC:6.1.1.19]	1	1	1	2	1	1	1	1	2	2	1	0	1	1	1	1	1	1	1	1	1	1	1	1	1	1	1	1	1	1	1
K01889	Translation	FARSA, pheS; phenylalanyl-tRNA synthetase alpha chain [EC:6.1.1.20]	1	1	1	1	1	1	1	1	1	1	1	1	1	1	1	1	1	1	1	1	1	1	1	1	1	1	1	1	1	1	1
K01890	Translation	FARSB, pheT; phenylalanyl-tRNA synthetase beta chain [EC:6.1.1.20]	3	3	3	3	3	3	2	3	3	3	3	2	3	3	3	3	4	3	2	3	3	3	3	3	3	3	2	3	3	3	3
K01890	Translation	FARSB, pheT; phenylalanyl-tRNA synthetase beta chain [EC:6.1.1.20]	3	3	3	3	3	3	2	3	3	3	3	2	3	3	3	3	4	3	2	3	3	3	3	3	3	3	2	3	3	3	3
K01892	Translation	HARS, hisS; histidyl-tRNA synthetase [EC:6.1.1.21]	3	2	2	4	3	3	3	1	3	3	2	1	2	3	2	2	3	2	1	3	3	3	3	3	2	3	1	3	2	2	2
K01892	Translation	HARS, hisS; histidyl-tRNA synthetase [EC:6.1.1.21]	3	2	2	4	3	3	3	1	3	3	2	1	2	3	2	2	3	2	1	3	3	3	3	3	2	3	1	3	2	2	2
K01893	Translation	NARS, asnS; asparaginyl-tRNA synthetase [EC:6.1.1.22]	1	1	1	1	1	1	1	1	0	0	1	0	1	0	0	0	0	0	0	0	1	1	2	1	2	1	0	1	1	2	2
K01895	Carbohydrate metabolism	ACSS1_2, acs; acetyl-CoA synthetase [EC:6.2.1.1]	0	0	0	0	1	0	0	0	0	0	0	0	0	0	0	0	0	0	0	0	0	0	0	0	0	0	0	0	0	0	0
K01897	Lipid metabolism	ACSL, fadD; long-chain acyl-CoA synthetase [EC:6.2.1.3]	1	1	1	2	1	0	3	1	0	0	2	0	1	0	0	0	0	0	0	0	1	1	2	1	2	2	1	2	2	2	2
K01902	Carbohydrate metabolism	sucD; succinyl-CoA synthetase alpha subunit [EC:6.2.1.5]	0	0	0	0	0	0	0	0	0	0	0	0	0	0	0	0	0	0	2	0	0	0	0	0	0	0	0	0	0	0	0
K01903	Carbohydrate metabolism	sucC; succinyl-CoA synthetase beta subunit [EC:6.2.1.5]	0	0	0	0	0	0	0	0	0	0	0	0	0	0	0	0	0	0	1	0	0	0	0	0	0	0	0	0	0	0	0
K01905	Carbohydrate metabolism	acdA; acetate---CoA ligase (ADP-forming) subunit alpha [EC:6.2.1.13]	0	0	1	0	1	0	0	0	0	0	0	0	0	0	0	0	0	0	0	0	0	0	0	0	0	0	0	0	0	0	0
K01912	Amino acid metabolism	paaK; phenylacetate-CoA ligase [EC:6.2.1.30]	2	2	3	3	2	2	2	3	2	2	2	2	1	2	2	2	1	1	1	2	2	2	2	3	2	2	1	2	2	3	2
K01912	Amino acid metabolism	paaK; phenylacetate-CoA ligase [EC:6.2.1.30]	2	2	3	3	2	2	2	3	2	2	2	2	1	2	2	2	1	1	1	2	2	2	2	3	2	2	1	2	2	3	2
K01915	Carbohydrate metabolism	glnA, GLUL; glutamine synthetase [EC:6.3.1.2]	1	2	2	2	2	1	2	2	0	0	1	2	1	1	0	0	0	0	2	0	1	3	1	2	2	2	0	1	1	1	1
K01916	Metabolism of cofactors and vitamins	nadE; NAD+ synthase [EC:6.3.1.5]	1	2	2	2	2	1	1	1	1	1	1	1	2	2	0	1	1	1	0	1	1	1	2	2	3	2	0	2	3	4	2
K01919	Amino acid metabolism	gshA; glutamate--cysteine ligase [EC:6.3.2.2]	0	0	0	0	0	0	0	0	0	0	0	0	0	0	0	0	0	0	0	0	0	0	0	0	0	0	0	0	0	1	0
K01921	Metabolism of other amino acids	ddl; D-alanine-D-alanine ligase [EC:6.3.2.4]	2	2	2	2	2	2	3	4	4	3	3	1	3	3	3	3	3	5	2	3	3	3	4	4	5	4	4	4	4	3	4
K01923	Nucleotide metabolism	purC; phosphoribosylaminoimidazole-succinocarboxamide synthase [EC:6.3.2.6]	2	2	2	2	2	2	2	2	2	2	2	2	2	2	2	1	2	2	1	2	2	2	2	2	2	2	1	2	2	2	2
K01923	Nucleotide metabolism	purC; phosphoribosylaminoimidazole-succinocarboxamide synthase [EC:6.3.2.6]	2	2	2	2	2	2	2	2	2	2	2	2	2	2	2	1	2	2	1	2	2	2	2	2	2	2	1	2	2	2	2
K01924	Glycan biosynthesis and metabolism	murC; UDP-N-acetylmuramate--alanine ligase [EC:6.3.2.8]	2	2	2	2	2	2	2	2	2	2	2	2	2	2	2	2	2	2	0	2	2	2	2	2	2	2	2	2	2	2	2
K01925	Metabolism of other amino acids	murD; UDP-N-acetylmuramoylalanine--D-glutamate ligase [EC:6.3.2.9]	1	1	1	1	1	1	1	1	1	1	1	1	1	1	1	1	1	1	0	1	1	1	1	1	1	1	1	1	1	1	1
K01925	Metabolism of other amino acids	murD; UDP-N-acetylmuramoylalanine--D-glutamate ligase [EC:6.3.2.9]	1	1	1	1	1	1	1	1	1	1	1	1	1	1	1	1	1	1	0	1	1	1	1	1	1	1	1	1	1	1	1
K01926	Protein families: genetic information processing	rex; redox-sensing transcriptional repressor	1	1	1	1	1	1	1	1	0	0	1	0	1	0	0	0	0	0	0	0	1	1	0	0	0	0	0	0	0	0	0
K01928	Amino acid metabolism	murE; UDP-N-acetylmuramoyl-L-alanyl-D-glutamate--2,6-diaminopimelate ligase [EC:6.3.2.13]	1	1	1	1	1	1	2	1	1	1	1	1	1	1	1	1	1	1	0	1	2	2	2	2	2	2	1	2	2	2	2
K01928	Amino acid metabolism	murE; UDP-N-acetylmuramoyl-L-alanyl-D-glutamate--2,6-diaminopimelate ligase [EC:6.3.2.13]	1	1	1	1	1	1	2	1	1	1	1	1	1	1	1	1	1	1	0	1	2	2	2	2	2	2	1	2	2	2	2
K01929	Amino acid metabolism	murF; UDP-N-acetylmuramoyl-tripeptide--D-alanyl-D-alanine ligase [EC:6.3.2.10]	1	1	2	1	1	1	1	1	1	1	1	1	1	2	1	1	1	1	0	1	1	1	1	1	1	1	1	1	1	1	1
K01929	Amino acid metabolism	murF; UDP-N-acetylmuramoyl-tripeptide--D-alanyl-D-alanine ligase [EC:6.3.2.10]	1	1	2	1	1	1	1	1	1	1	1	1	1	2	1	1	1	1	0	1	1	1	1	1	1	1	1	1	1	1	1
K01932	Unclassified: metabolism	capB, pgsB; gamma-polyglutamate synthase [EC:6.3.2.-]	0	0	0	0	0	0	1	0	0	0	0	0	0	0	0	0	0	0	0	0	0	0	1	1	1	1	0	1	1	1	1
K01933	Nucleotide metabolism	purM; phosphoribosylformylglycinamidine cyclo-ligase [EC:6.3.3.1]	1	1	1	1	1	1	1	1	1	1	2	0	1	1	0	1	1	1	1	1	1	1	1	1	1	1	1	1	1	1	1
K01937	Nucleotide metabolism	pyrG, CTPS; CTP synthase [EC:6.3.4.2]	1	1	1	2	1	1	1	1	1	1	1	1	1	1	1	1	1	1	1	1	1	1	1	1	1	1	1	1	1	1	1
K01938	Energy metabolism	fhs; formate--tetrahydrofolate ligase [EC:6.3.4.3]	1	1	1	2	1	1	1	1	1	1	2	1	1	1	0	1	1	1	0	1	1	1	1	1	2	1	1	1	0	1	1
K01939	Nucleotide metabolism	purA, ADSS; adenylosuccinate synthase [EC:6.3.4.4]	1	2	3	1	2	1	2	2	1	1	1	2	2	1	2	1	0	1	0	1	1	1	1	2	1	1	2	1	1	2	1
K01939	Nucleotide metabolism	purA, ADSS; adenylosuccinate synthase [EC:6.3.4.4]	1	2	3	1	2	1	2	2	1	1	1	2	2	1	2	1	0	1	0	1	1	1	1	2	1	1	2	1	1	2	1
K01940	Amino acid metabolism	argG, ASS1; argininosuccinate synthase [EC:6.3.4.5]	1	1	1	1	1	1	1	1	1	1	1	1	1	2	1	1	1	1	1	1	1	1	1	1	1	1	0	1	1	1	1
K01941	Amino acid metabolism	E6.3.4.6; urea carboxylase [EC:6.3.4.6]	1	1	1	0	1	1	0	0	0	0	1	1	0	0	0	0	0	0	0	0	0	0	0	0	0	0	0	0	0	0	0
K01945	Nucleotide metabolism	purD; phosphoribosylamine---glycine ligase [EC:6.3.4.13]	1	1	3	1	1	1	1	1	1	1	1	0	2	1	0	1	1	1	1	1	1	1	1	1	1	1	0	1	1	1	1
K01950	Metabolism of cofactors and vitamins	E6.3.5.1, NADSYN1, QNS1, nadE; NAD+ synthase (glutamine-hydrolysing) [EC:6.3.5.1]	0	1	1	1	1	0	0	0	0	0	0	1	1	1	0	0	0	0	0	0	1	1	1	1	1	1	0	1	1	1	1
K01951	Nucleotide metabolism	guaA, GMPS; GMP synthase (glutamine-hydrolysing) [EC:6.3.5.2]	1	2	2	2	2	1	1	1	1	1	1	1	2	1	1	1	0	2	0	1	2	2	1	1	1	1	0	1	1	1	1
K01952	Nucleotide metabolism	PFAS, purL; phosphoribosylformylglycinamidine synthase [EC:6.3.5.3]	4	4	5	5	5	4	4	4	4	4	4	3	6	4	3	4	5	4	4	4	4	4	4	5	4	4	3	4	4	5	4
K01952	Nucleotide metabolism	PFAS, purL; phosphoribosylformylglycinamidine synthase [EC:6.3.5.3]	4	4	5	5	5	4	4	4	4	4	4	3	6	4	3	4	5	4	4	4	4	4	4	5	4	4	3	4	4	5	4
K01953	Amino acid metabolism	asnB, ASNS; asparagine synthase (glutamine-hydrolysing) [EC:6.3.5.4]	1	2	2	1	0	0	0	0	1	1	1	1	0	1	0	0	1	1	0	1	1	1	1	1	1	1	1	1	1	1	1
K01955	Nucleotide metabolism	carB, CPA2; carbamoyl-phosphate synthase large subunit [EC:6.3.5.5]	1	1	5	2	1	1	1	3	2	1	1	1	3	1	0	1	1	1	1	1	1	1	1	2	1	1	1	1	1	1	1
K01955	Nucleotide metabolism	carB, CPA2; carbamoyl-phosphate synthase large subunit [EC:6.3.5.5]	1	1	5	2	1	1	1	3	2	1	1	1	3	1	0	1	1	1	1	1	1	1	1	2	1	1	1	1	1	1	1
K01956	Nucleotide metabolism	carA, CPA1; carbamoyl-phosphate synthase small subunit [EC:6.3.5.5]	1	1	1	3	1	1	1	1	1	1	1	0	1	1	0	1	1	1	1	1	1	1	1	1	1	1	1	1	1	1	1
K01956	Nucleotide metabolism	carA, CPA1; carbamoyl-phosphate synthase small subunit [EC:6.3.5.5]	1	1	1	3	1	1	1	1	1	1	1	0	1	1	0	1	1	1	1	1	1	1	1	1	1	1	1	1	1	1	1
K01960	Carbohydrate metabolism	pycB; pyruvate carboxylase subunit B [EC:6.4.1.1]	1	1	1	0	1	0	1	1	0	0	0	0	0	0	0	0	0	0	0	0	0	0	0	0	0	0	0	0	0	0	0
K01961	Carbohydrate metabolism	accC; acetyl-CoA carboxylase, biotin carboxylase subunit [EC:6.4.1.2 6.3.4.14]	2	2	2	1	2	1	2	2	1	1	1	1	1	1	1	1	2	1	1	1	1	1	1	1	1	1	0	1	2	3	1
K01961	Carbohydrate metabolism	accC; acetyl-CoA carboxylase, biotin carboxylase subunit [EC:6.4.1.2 6.3.4.14]	2	2	2	1	2	1	2	2	1	1	1	1	1	1	1	1	2	1	1	1	1	1	1	1	1	1	0	1	2	3	1
K01965	Carbohydrate metabolism	PCCA, pccA; propionyl-CoA carboxylase alpha chain [EC:6.4.1.3]	1	1	1	1	1	1	1	0	1	1	0	0	1	1	1	1	1	1	1	1	0	0	1	1	1	1	0	1	0	1	1
K01965	Carbohydrate metabolism	PCCA, pccA; propionyl-CoA carboxylase alpha chain [EC:6.4.1.3]	1	1	1	1	1	1	1	0	1	1	0	0	1	1	1	1	1	1	1	1	0	0	1	1	1	1	0	1	0	1	1
K01966	Carbohydrate metabolism	PCCB, pccB; propionyl-CoA carboxylase beta chain [EC:6.4.1.3 2.1.3.15]	1	1	2	2	1	1	1	1	1	1	1	0	1	1	1	1	1	1	1	1	1	1	1	1	1	1	1	1	1	1	1
K01971	Replication and repair	ligD; bifunctional non-homologous end joining protein LigD [EC:6.5.1.1]	1	0	0	1	0	0	0	1	1	1	1	0	0	1	0	1	1	1	0	0	1	1	0	0	0	0	0	0	0	0	0
K01972	Replication and repair	E6.5.1.2, ligA, ligB; DNA ligase (NAD+) [EC:6.5.1.2]	1	1	2	1	1	1	1	1	1	1	1	1	1	1	1	1	1	1	0	1	1	1	1	1	1	1	1	1	2	1	1
K01975	Protein families: genetic information processing	thpR; RNA 2',3'-cyclic 3'-phosphodiesterase [EC:3.1.4.58]	1	1	1	1	1	1	1	1	1	2	1	1	0	1	1	1	1	1	1	1	1	1	1	1	1	1	1	1	1	1	1
K01989	Protein families: signaling and cellular processes	K01989; putative tryptophan/tyrosine transport system substrate-binding protein	2	2	2	2	2	2	2	2	2	2	2	0	2	2	2	3	2	6	2	2	2	2	2	3	2	2	0	2	2	2	2
K01990	Protein families: signaling and cellular processes	ABC-2.A; ABC-2 type transport system ATP-binding protein	3	4	5	3	3	2	3	4	4	3	4	3	3	3	2	4	3	4	2	3	3	2	6	4	4	5	2	5	4	4	5
K01991	Signal transduction	wza, gfcE; polysaccharide biosynthesis/export protein	3	2	2	3	2	2	2	1	2	2	1	1	1	3	1	2	3	2	2	2	2	2	1	1	2	1	2	1	1	1	1
K01992	Protein families: signaling and cellular processes	ABC-2.P; ABC-2 type transport system permease protein	1	2	2	1	1	0	1	1	1	0	1	0	1	0	0	0	0	0	0	0	1	0	3	3	2	3	1	3	2	5	3
K01995	Membrane transport	livG; branched-chain amino acid transport system ATP-binding protein	4	3	4	4	4	2	3	3	2	2	3	1	4	2	0	1	2	2	0	2	4	3	4	4	5	4	4	4	5	4	5
K01996	Membrane transport	livF; branched-chain amino acid transport system ATP-binding protein	4	3	4	4	4	2	3	3	2	2	3	1	3	2	0	0	2	2	1	2	4	2	4	4	6	4	4	4	4	5	5
K01997	Membrane transport	livH; branched-chain amino acid transport system permease protein	5	4	6	5	5	2	4	5	2	2	3	1	5	2	0	1	1	2	1	2	4	3	5	4	6	5	3	6	6	5	7
K01998	Membrane transport	livM; branched-chain amino acid transport system permease protein	7	6	7	7	6	4	6	5	3	3	6	0	7	3	0	1	2	3	2	3	8	6	7	8	8	7	6	7	8	7	9
K01998	Membrane transport	livM; branched-chain amino acid transport system permease protein	7	6	7	7	6	4	6	5	3	3	6	0	7	3	0	1	2	3	2	3	8	6	7	8	8	7	6	7	8	7	9
K01999	Membrane transport	livK; branched-chain amino acid transport system substrate-binding protein	4	3	4	4	4	2	3	3	2	2	3	1	3	2	0	1	2	2	0	2	4	3	4	4	6	4	3	4	5	4	6
K01999	Membrane transport	livK; branched-chain amino acid transport system substrate-binding protein	4	3	4	4	4	2	3	3	2	2	3	1	3	2	0	1	2	2	0	2	4	3	4	4	6	4	3	4	5	4	6
K02000	Membrane transport	proV; glycine betaine/proline transport system ATP-binding protein [EC:7.6.2.9]	0	0	0	0	0	0	0	1	0	0	0	0	0	0	0	0	0	0	0	0	0	1	0	0	0	1	0	0	0	0	0
K02001	Membrane transport	proW; glycine betaine/proline transport system permease protein	1	1	1	1	1	1	1	1	0	0	1	0	0	0	0	0	0	0	0	0	1	1	0	2	0	1	0	0	0	0	0
K02003	Protein families: signaling and cellular processes	ABC.CD.A; putative ABC transport system ATP-binding protein	1	1	1	1	1	1	1	1	2	1	1	1	2	1	1	1	1	1	0	1	1	1	3	4	3	3	4	3	4	3	3
K02004	Protein families: signaling and cellular processes	ABC.CD.P; putative ABC transport system permease protein	1	1	1	1	1	1	1	1	1	1	2	1	1	1	1	1	1	1	0	1	1	1	2	2	2	2	2	2	3	2	2
K02005	Unclassified: signaling and cellular processes	ABC.CD.TX; HlyD family secretion protein	2	2	2	2	2	2	2	1	1	1	1	1	2	1	0	1	1	1	1	1	1	1	3	2	3	3	2	3	3	3	3
K02006	Membrane transport	cbiO; cobalt/nickel transport system ATP-binding protein	1	1	1	0	1	3	3	0	0	0	0	1	1	0	0	0	0	0	0	0	3	3	1	1	1	1	0	1	2	2	1
K02007	Membrane transport	cbiM; cobalt/nickel transport system permease protein	1	1	1	1	1	1	1	0	0	0	0	0	1	0	0	0	0	0	0	0	2	2	0	0	0	0	0	0	0	0	0
K02008	Membrane transport	cbiQ; cobalt/nickel transport system permease protein	1	1	1	1	1	1	1	0	0	0	0	0	1	0	0	0	0	0	0	0	1	1	0	0	0	0	0	0	0	0	0
K02008	Membrane transport	cbiQ; cobalt/nickel transport system permease protein	1	1	1	1	1	1	1	0	0	0	0	0	1	0	0	0	0	0	0	0	1	1	0	0	0	0	0	0	0	0	0
K02009	Membrane transport	cbiN; cobalt/nickel transport protein	1	1	1	1	1	1	1	0	0	0	0	0	1	0	0	0	0	0	0	0	1	1	0	0	0	0	0	0	0	0	0
K02009	Membrane transport	cbiN; cobalt/nickel transport protein	1	1	1	1	1	1	1	0	0	0	0	0	1	0	0	0	0	0	0	0	1	1	0	0	0	0	0	0	0	0	0
K02010	Membrane transport	afuC, fbpC; iron(III) transport system ATP-binding protein [EC:7.2.2.7]	0	0	0	0	0	0	1	1	0	0	0	0	0	0	0	0	0	0	0	0	0	0	1	2	1	1	1	1	1	1	1
K02011	Membrane transport	afuB, fbpB; iron(III) transport system permease protein	0	0	0	0	0	0	0	0	2	2	0	0	0	0	0	0	0	0	0	1	0	0	0	0	0	0	0	0	0	0	0
K02012	Membrane transport	afuA, fbpA; iron(III) transport system substrate-binding protein	0	0	0	0	0	0	0	0	1	1	0	0	0	0	0	0	0	0	0	1	0	0	0	0	0	0	0	0	0	0	0
K02013	Protein families: signaling and cellular processes	ABC.FEV.A; iron complex transport system ATP-binding protein [EC:7.2.2.-]	4	4	4	2	3	3	4	3	2	2	3	2	3	2	2	2	2	2	1	2	3	3	2	3	5	4	1	3	3	4	4
K02013	Protein families: signaling and cellular processes	ABC.FEV.A; iron complex transport system ATP-binding protein [EC:7.2.2.-]	4	4	4	2	3	3	4	3	2	2	3	2	3	2	2	2	2	2	1	2	3	3	2	3	5	4	1	3	3	4	4
K02014	Protein families: signaling and cellular processes	TC.FEV.OM; iron complex outermembrane recepter protein	1	1	1	1	1	1	1	0	2	4	1	1	0	2	0	2	2	1	0	2	1	1	0	1	0	0	0	0	0	0	0
K02015	Protein families: signaling and cellular processes	ABC.FEV.P; iron complex transport system permease protein	1	1	1	0	1	1	1	1	1	1	1	3	1	1	2	1	1	1	1	1	2	2	1	3	4	2	1	2	2	3	2
K02016	Protein families: signaling and cellular processes	ABC.FEV.S; iron complex transport system substrate-binding protein	1	1	1	2	2	1	1	1	1	1	1	2	1	1	1	1	1	1	1	1	3	3	2	4	5	3	0	3	1	3	5
K02016	Protein families: signaling and cellular processes	ABC.FEV.S; iron complex transport system substrate-binding protein	1	1	1	2	2	1	1	1	1	1	1	2	1	1	1	1	1	1	1	1	3	3	2	4	5	3	0	3	1	3	5
K02017	Membrane transport	modC; molybdate transport system ATP-binding protein [EC:7.3.2.5]	1	1	1	1	1	1	1	1	1	1	1	0	1	1	0	1	1	1	0	1	1	1	0	0	0	0	0	0	0	0	0
K02021	Protein families: signaling and cellular processes	ABC.MR; putative ABC transport system ATP-binding protein	0	0	0	0	0	0	0	0	1	1	0	0	0	1	1	1	0	2	0	1	0	0	0	0	0	0	0	0	0	0	0
K02022	Unclassified: signaling and cellular processes	ABC.MR.TX; HlyD family secretion protein	0	1	1	0	0	0	0	0	0	0	0	0	0	0	0	0	0	0	0	0	0	0	0	0	0	0	0	0	0	0	0
K02025	Protein families: signaling and cellular processes	ABC.MS.P; multiple sugar transport system permease protein	22	27	21	29	21	23	37	23	25	21	24	15	17	21	2	12	9	7	14	19	26	32	36	30	38	45	16	34	35	34	35
K02026	Protein families: signaling and cellular processes	ABC.MS.P1; multiple sugar transport system permease protein	21	25	22	33	19	22	32	31	23	19	20	14	20	18	2	9	11	7	13	17	29	33	37	35	38	46	20	36	34	37	33
K02026	Protein families: signaling and cellular processes	ABC.MS.P1; multiple sugar transport system permease protein	21	25	22	33	19	22	32	31	23	19	20	14	20	18	2	9	11	7	13	17	29	33	37	35	38	46	20	36	34	37	33
K02027	Protein families: signaling and cellular processes	ABC.MS.S; multiple sugar transport system substrate-binding protein	20	21	18	27	16	23	32	24	19	16	20	14	14	16	4	8	8	6	13	17	23	27	29	25	34	35	12	27	34	27	28
K02027	Protein families: signaling and cellular processes	ABC.MS.S; multiple sugar transport system substrate-binding protein	20	21	18	27	16	23	32	24	19	16	20	14	14	16	4	8	8	6	13	17	23	27	29	25	34	35	12	27	34	27	28
K02028	Protein families: signaling and cellular processes	ABC.PA.A; polar amino acid transport system ATP-binding protein [EC:7.4.2.1]	1	1	1	1	1	1	1	1	2	2	1	1	1	2	0	1	3	2	1	2	1	1	3	2	3	2	1	3	3	2	4
K02029	Protein families: signaling and cellular processes	ABC.PA.P; polar amino acid transport system permease protein	3	4	4	4	4	4	4	5	5	5	3	3	4	5	1	3	6	5	3	5	3	3	7	5	7	5	2	7	7	5	9
K02029	Protein families: signaling and cellular processes	ABC.PA.P; polar amino acid transport system permease protein	3	4	4	4	4	4	4	5	5	5	3	3	4	5	1	3	6	5	3	5	3	3	7	5	7	5	2	7	7	5	9
K02030	Protein families: signaling and cellular processes	ABC.PA.S; polar amino acid transport system substrate-binding protein	5	4	5	5	4	4	6	7	4	4	4	4	4	4	2	3	9	4	3	4	2	4	6	2	8	5	1	7	7	4	8
K02030	Protein families: signaling and cellular processes	ABC.PA.S; polar amino acid transport system substrate-binding protein	5	4	5	5	4	4	6	7	4	4	4	4	4	4	2	3	9	4	3	4	2	4	6	2	8	5	1	7	7	4	8
K02031	Cellular community - prokaryotes	ddpD; peptide/nickel transport system ATP-binding protein	6	7	8	5	12	14	12	7	7	12	3	6	4	13	0	7	8	8	2	11	10	6	11	11	12	8	4	11	10	10	10
K02032	Cellular community - prokaryotes	ddpF; peptide/nickel transport system ATP-binding protein	9	10	12	8	15	17	17	10	9	15	6	6	7	16	0	7	9	8	2	13	12	8	13	14	14	11	6	13	12	12	13
K02032	Cellular community - prokaryotes	ddpF; peptide/nickel transport system ATP-binding protein	9	10	12	8	15	17	17	10	9	15	6	6	7	16	0	7	9	8	2	13	12	8	13	14	14	11	6	13	12	12	13
K02033	Cellular community - prokaryotes	ABC.PE.P; peptide/nickel transport system permease protein	5	6	8	5	8	6	8	5	6	7	2	5	4	8	0	3	4	9	2	7	6	4	8	7	8	5	3	6	8	7	8
K02033	Cellular community - prokaryotes	ABC.PE.P; peptide/nickel transport system permease protein	5	6	8	5	8	6	8	5	6	7	2	5	4	8	0	3	4	9	2	7	6	4	8	7	8	5	3	6	8	7	8
K02034	Cellular community - prokaryotes	ABC.PE.P1; peptide/nickel transport system permease protein	5	6	9	6	8	6	9	5	5	8	2	6	5	8	0	4	5	6	2	7	6	4	9	9	9	5	3	7	7	7	8
K02034	Cellular community - prokaryotes	ABC.PE.P1; peptide/nickel transport system permease protein	5	6	9	6	8	6	9	5	5	8	2	6	5	8	0	4	5	6	2	7	6	4	9	9	9	5	3	7	7	7	8
K02035	Cellular community - prokaryotes	ABC.PE.S; peptide/nickel transport system substrate-binding protein	5	6	8	12	8	5	8	4	4	9	2	4	4	8	9	5	7	21	3	8	6	4	8	8	13	6	1	8	8	7	6
K02036	Membrane transport	pstB; phosphate transport system ATP-binding protein [EC:7.3.2.1]	1	1	1	1	1	1	1	1	1	1	1	1	1	1	1	1	1	1	1	1	1	1	1	1	1	1	0	1	1	1	1
K02037	Membrane transport	pstC; phosphate transport system permease protein	2	2	2	2	1	1	1	1	1	1	1	1	2	1	1	1	1	1	1	1	1	1	1	1	1	1	0	1	1	1	1
K02038	Membrane transport	pstA; phosphate transport system permease protein	4	4	5	4	2	2	2	2	2	2	3	2	4	2	2	2	2	2	2	2	2	2	2	2	2	2	0	2	2	2	2
K02038	Membrane transport	pstA; phosphate transport system permease protein	4	4	5	4	2	2	2	2	2	2	3	2	4	2	2	2	2	2	2	2	2	2	2	2	2	2	0	2	2	2	2
K02039	Unclassified: signaling and cellular processes	phoU; phosphate transport system protein	1	2	1	1	1	1	1	1	1	1	1	1	1	1	1	1	1	0	1	1	1	1	1	1	1	1	1	1	1	1	1
K02040	Membrane transport	pstS; phosphate transport system substrate-binding protein	2	2	2	3	1	1	1	1	1	1	2	1	2	1	1	1	1	0	1	1	1	1	1	4	2	2	1	2	2	2	2
K02049	Protein families: signaling and cellular processes	ABC.SN.A; NitT/TauT family transport system ATP-binding protein	0	0	0	0	0	0	0	3	0	0	0	0	2	0	0	0	0	0	0	0	0	0	1	0	2	0	0	0	5	0	1
K02050	Protein families: signaling and cellular processes	ABC.SN.P; NitT/TauT family transport system permease protein	0	0	0	0	0	0	0	1	0	0	0	0	1	0	0	0	0	0	0	0	0	0	0	0	0	0	0	0	1	0	0
K02051	Protein families: signaling and cellular processes	ABC.SN.S; NitT/TauT family transport system substrate-binding protein	0	0	0	0	0	0	0	0	0	0	0	0	0	0	0	0	0	0	0	0	0	0	1	0	2	0	0	0	1	0	1
K02052	Cellular community - prokaryotes	ABC.SP.A; putative spermidine/putrescine transport system ATP-binding protein	0	0	0	0	2	1	2	0	3	2	0	0	0	2	0	0	1	0	0	2	0	0	0	0	0	0	0	0	0	0	0
K02052	Cellular community - prokaryotes	ABC.SP.A; putative spermidine/putrescine transport system ATP-binding protein	0	0	0	0	2	1	2	0	3	2	0	0	0	2	0	0	1	0	0	2	0	0	0	0	0	0	0	0	0	0	0
K02053	Cellular community - prokaryotes	ABC.SP.P; putative spermidine/putrescine transport system permease protein	0	0	0	0	2	2	4	0	1	1	0	0	0	1	0	0	1	0	0	1	0	0	0	0	0	0	0	0	0	0	0
K02054	Cellular community - prokaryotes	ABC.SP.P1; putative spermidine/putrescine transport system permease protein	0	0	0	0	0	0	2	0	1	1	0	0	0	1	0	0	1	0	0	1	0	0	0	0	0	0	0	0	0	0	0
K02054	Cellular community - prokaryotes	ABC.SP.P1; putative spermidine/putrescine transport system permease protein	0	0	0	0	0	0	2	0	1	1	0	0	0	1	0	0	1	0	0	1	0	0	0	0	0	0	0	0	0	0	0
K02055	Cellular community - prokaryotes	ABC.SP.S; putative spermidine/putrescine transport system substrate-binding protein	0	0	0	0	1	1	2	1	1	1	0	0	0	1	0	0	1	0	1	2	0	0	1	1	1	1	0	1	1	2	1
K02055	Cellular community - prokaryotes	ABC.SP.S; putative spermidine/putrescine transport system substrate-binding protein	0	0	0	0	1	1	2	1	1	1	0	0	0	1	0	0	1	0	1	2	0	0	1	1	1	1	0	1	1	2	1
K02056	Protein families: signaling and cellular processes	ABC.SS.A; simple sugar transport system ATP-binding protein [EC:7.5.2.-]	8	9	8	11	7	9	13	11	10	9	7	7	8	10	3	6	8	6	9	8	9	8	11	9	14	9	5	13	10	12	10
K02057	Protein families: signaling and cellular processes	ABC.SS.P; simple sugar transport system permease protein	10	11	13	10	12	9	13	14	17	14	9	9	10	14	3	9	9	6	12	14	11	10	16	12	15	14	11	15	13	16	12
K02057	Protein families: signaling and cellular processes	ABC.SS.P; simple sugar transport system permease protein	10	11	13	10	12	9	13	14	17	14	9	9	10	14	3	9	9	6	12	14	11	10	16	12	15	14	11	15	13	16	12
K02058	Protein families: signaling and cellular processes	ABC.SS.S; simple sugar transport system substrate-binding protein	8	10	10	12	7	9	14	13	9	10	8	10	9	10	1	7	6	6	8	8	11	11	17	22	17	15	8	16	15	16	14
K02071	Membrane transport	metN; D-methionine transport system ATP-binding protein	0	0	0	0	0	0	0	0	0	0	0	0	0	0	0	0	0	0	0	0	1	1	0	0	0	0	0	0	0	0	0
K02075	Protein families: signaling and cellular processes	ABC.ZM.P; zinc/manganese transport system permease protein	0	0	0	0	0	0	0	1	0	0	0	0	0	0	0	0	0	0	0	0	0	0	0	0	0	0	0	0	0	0	0
K02077	Protein families: signaling and cellular processes	ABC.ZM.S; zinc/manganese transport system substrate-binding protein	1	1	1	1	1	1	1	0	1	1	1	0	1	1	0	1	1	1	0	1	0	0	0	0	0	0	0	0	0	0	0
K02077	Protein families: signaling and cellular processes	ABC.ZM.S; zinc/manganese transport system substrate-binding protein	1	1	1	1	1	1	1	0	1	1	1	0	1	1	0	1	1	1	0	1	0	0	0	0	0	0	0	0	0	0	0
K02078	Lipid metabolism	acpP; acyl carrier protein	1	1	1	1	1	1	1	1	1	1	1	1	1	1	1	1	1	1	1	1	1	1	1	1	1	1	1	1	1	1	1
K02081	Protein families: genetic information processing	agaR; DeoR family transcriptional regulator, aga operon transcriptional repressor	0	0	1	0	0	0	1	0	1	2	0	1	0	2	0	0	0	0	1	1	0	1	0	0	0	1	0	0	0	0	0
K02082	Carbohydrate metabolism	agaS; D-galactosamine 6-phosphate deaminase/isomerase [EC:3.5.99.-]	0	0	0	0	0	0	0	0	0	0	0	0	0	0	0	0	0	0	0	0	0	0	1	1	1	2	1	1	1	1	1
K02086	Unclassified: genetic information processing	dnaD; DNA replication protein	0	0	0	0	0	0	0	0	0	0	0	0	0	0	0	2	0	4	1	0	0	0	0	0	0	0	0	0	0	0	0
K02096	Energy metabolism	apcE; phycobilisome core-membrane linker protein	0	1	1	0	1	0	1	1	0	0	0	1	1	0	0	0	0	0	0	0	0	0	0	1	0	0	1	0	0	0	0
K02099	Protein families: genetic information processing	araC; AraC family transcriptional regulator, arabinose operon regulatory protein	0	0	1	1	0	0	0	0	0	0	0	0	0	0	0	0	0	0	0	0	0	0	0	0	0	0	0	0	0	0	0
K02101	Unclassified: metabolism	araL; sugar-phosphatase [EC:3.1.3.23]	1	0	0	1	0	1	1	0	0	0	1	0	1	0	0	0	0	0	0	0	0	0	0	0	0	0	0	0	0	0	0
K02103	Protein families: genetic information processing	araR; GntR family transcriptional regulator, arabinose operon transcriptional repressor	0	0	0	0	0	0	0	0	0	0	0	1	0	0	1	0	3	0	0	0	0	0	0	0	0	0	0	0	0	0	0
K02103	Protein families: genetic information processing	araR; GntR family transcriptional regulator, arabinose operon transcriptional repressor	0	0	0	0	0	0	0	0	0	0	0	1	0	0	1	0	3	0	0	0	0	0	0	0	0	0	0	0	0	0	0
K02108	Energy metabolism	ATPF0A, atpB; F-type H+-transporting ATPase subunit a	1	1	1	1	1	1	1	1	0	0	1	0	1	0	1	0	0	0	0	0	1	1	1	0	1	1	1	1	0	1	1
K02109	Energy metabolism	ATPF0B, atpF; F-type H+-transporting ATPase subunit b	2	1	1	1	0	0	0	0	0	0	0	0	0	0	0	0	0	0	0	0	0	0	1	0	1	1	1	1	0	1	1
K02110	Energy metabolism	ATPF0C, atpE; F-type H+-transporting ATPase subunit c	2	2	2	2	2	2	2	2	1	1	2	2	2	1	3	1	1	2	2	1	3	3	2	1	2	2	2	1	1	2	2
K02111	Energy metabolism	ATPF1A, atpA; F-type H+/Na+-transporting ATPase subunit alpha [EC:7.1.2.2 7.2.2.1]	1	1	1	1	1	1	1	1	0	0	2	1	1	0	1	0	0	0	1	0	1	1	1	1	1	1	1	1	1	1	2
K02112	Energy metabolism	ATPF1B, atpD; F-type H+/Na+-transporting ATPase subunit beta [EC:7.1.2.2 7.2.2.1]	1	1	1	1	1	1	1	2	0	0	1	1	1	1	1	0	0	1	1	1	1	1	1	1	1	1	1	2	1	1	1
K02113	Energy metabolism	ATPF1D, atpH; F-type H+-transporting ATPase subunit delta	1	1	1	1	0	1	0	0	0	0	0	0	1	0	0	0	0	0	0	0	0	0	0	0	0	0	0	0	0	0	0
K02113	Energy metabolism	ATPF1D, atpH; F-type H+-transporting ATPase subunit delta	1	1	1	1	0	1	0	0	0	0	0	0	1	0	0	0	0	0	0	0	0	0	0	0	0	0	0	0	0	0	0
K02114	Energy metabolism	ATPF1E, atpC; F-type H+-transporting ATPase subunit epsilon	1	1	1	1	1	1	1	1	0	0	1	0	1	0	0	0	0	0	1	0	1	1	1	1	1	1	1	1	1	1	1
K02115	Energy metabolism	ATPF1G, atpG; F-type H+-transporting ATPase subunit gamma	1	1	1	1	1	1	1	1	0	0	1	1	1	0	1	0	0	0	1	0	1	1	1	1	1	1	1	1	1	1	1
K02116	Protein families: metabolism	atpI; ATP synthase protein I	0	0	0	1	1	1	1	1	0	0	1	0	1	0	1	0	0	0	0	0	1	0	1	1	1	0	1	1	0	1	1
K02117	Energy metabolism	ATPVA, ntpA, atpA; V/A-type H+/Na+-transporting ATPase subunit A [EC:7.1.2.2 7.2.2.1]	1	1	1	1	1	1	1	2	1	1	1	0	1	1	1	2	1	1	1	1	2	2	1	1	2	1	0	1	2	0	1
K02118	Energy metabolism	ATPVB, ntpB, atpB; V/A-type H+/Na+-transporting ATPase subunit B	1	1	1	1	1	1	1	1	1	1	1	0	1	1	1	2	1	1	1	1	2	2	1	1	1	1	1	1	1	0	1
K02119	Energy metabolism	ATPVC, ntpC, atpC; V/A-type H+/Na+-transporting ATPase subunit C	1	1	1	1	1	1	1	1	1	1	1	0	1	1	2	1	1	3	1	1	2	2	1	1	2	1	1	1	1	0	1
K02120	Energy metabolism	ATPVD, ntpD, atpD; V/A-type H+/Na+-transporting ATPase subunit D	1	1	1	1	1	1	1	1	1	1	1	0	1	1	1	2	1	1	1	1	2	2	1	1	1	1	1	1	1	0	1
K02122	Energy metabolism	ATPVF, ntpF, atpF; V/A-type H+/Na+-transporting ATPase subunit F	1	1	1	1	1	1	1	1	1	1	1	0	1	1	1	1	1	1	1	1	2	2	1	1	1	1	0	1	1	0	1
K02123	Energy metabolism	ATPVI, ntpI, atpI; V/A-type H+/Na+-transporting ATPase subunit I	1	1	3	1	1	1	1	1	1	1	1	1	1	1	3	1	1	2	1	1	2	2	2	1	2	1	2	1	1	1	2
K02124	Energy metabolism	ATPVK, ntpK, atpK; V/A-type H+/Na+-transporting ATPase subunit K	1	1	1	1	1	1	1	1	1	1	1	1	1	1	2	1	1	2	1	1	2	2	1	1	1	1	1	0	1	1	1
K02160	Carbohydrate metabolism	accB, bccP; acetyl-CoA carboxylase biotin carboxyl carrier protein	0	0	0	0	0	0	1	0	0	0	0	0	0	0	0	0	0	0	0	0	0	0	0	0	0	0	0	0	0	0	0
K02167	Protein families: genetic information processing	betI; TetR/AcrR family transcriptional regulator, transcriptional repressor of bet genes	1	1	1	1	1	1	0	1	0	0	1	0	0	0	0	0	0	0	0	0	0	0	1	1	1	0	0	1	0	1	1
K02169	Metabolism of cofactors and vitamins	bioC; malonyl-CoA O-methyltransferase [EC:2.1.1.197]	1	1	1	1	1	1	1	1	0	0	1	0	1	0	0	0	0	0	0	0	0	0	0	0	0	0	0	0	1	1	0
K02170	Metabolism of cofactors and vitamins	bioH; pimeloyl-[acyl-carrier protein] methyl ester esterase [EC:3.1.1.85]	1	1	1	1	1	1	1	1	0	0	1	0	1	0	0	0	0	0	0	0	0	0	0	0	0	0	0	0	0	0	0
K02172	Drug resistance: antimicrobial	blaR1; bla regulator protein blaR1	1	0	0	1	0	0	0	0	1	0	0	0	1	0	0	0	0	0	0	0	0	0	0	0	0	0	0	0	0	0	0
K02188	Metabolism of cofactors and vitamins	cbiD; cobalt-precorrin-5B (C1)-methyltransferase [EC:2.1.1.195]	1	1	0	0	1	3	3	0	0	0	0	1	1	0	0	0	0	0	0	0	1	1	1	1	1	1	0	1	2	2	1
K02188	Metabolism of cofactors and vitamins	cbiD; cobalt-precorrin-5B (C1)-methyltransferase [EC:2.1.1.195]	1	1	0	0	1	3	3	0	0	0	0	1	1	0	0	0	0	0	0	0	1	1	1	1	1	1	0	1	2	2	1
K02189	Metabolism of cofactors and vitamins	cbiG; cobalt-precorrin 5A hydrolase [EC:3.7.1.12]	1	1	0	2	1	1	1	0	0	0	0	0	1	0	0	0	0	0	0	0	1	1	1	1	1	1	0	1	1	1	1
K02189	Metabolism of cofactors and vitamins	cbiG; cobalt-precorrin 5A hydrolase [EC:3.7.1.12]	1	1	0	2	1	1	1	0	0	0	0	0	1	0	0	0	0	0	0	0	1	1	1	1	1	1	0	1	1	1	1
K02190	Metabolism of cofactors and vitamins	cbiK; sirohydrochlorin cobaltochelatase [EC:4.99.1.3]	1	1	1	0	1	0	0	0	0	0	0	0	1	0	0	0	0	0	0	0	1	1	0	1	2	1	0	1	1	2	0
K02191	Metabolism of cofactors and vitamins	cbiT; cobalt-precorrin-6B (C15)-methyltransferase [EC:2.1.1.196]	1	1	0	1	1	1	1	0	0	0	0	0	1	0	0	0	0	0	0	0	1	1	1	1	1	1	0	1	2	1	1
K02199	Protein families: genetic information processing	ccmG, dsbE; cytochrome c biogenesis protein CcmG, thiol:disulfide interchange protein DsbE	0	0	0	0	0	0	0	1	0	0	0	0	0	0	0	0	0	0	0	0	0	0	1	0	2	1	0	1	1	0	1
K02217	Unclassified: metabolism	ftnA, ftn; ferritin [EC:1.16.3.2]	1	1	1	1	1	1	1	0	0	1	1	1	0	1	0	1	0	1	1	1	1	1	1	1	1	1	1	1	0	1	1
K02224	Metabolism of cofactors and vitamins	cobB-cbiA; cobyrinic acid a,c-diamide synthase [EC:6.3.5.9 6.3.5.11]	0	0	0	0	0	0	1	0	0	0	0	0	0	0	0	0	0	0	0	0	0	0	1	1	1	1	1	1	1	1	1
K02226	Metabolism of cofactors and vitamins	cobC, phpB; alpha-ribazole phosphatase [EC:3.1.3.73]	1	1	0	1	1	1	1	1	1	1	1	0	1	2	2	1	1	1	0	1	1	1	1	1	1	1	1	1	1	1	1
K02227	Metabolism of cofactors and vitamins	cbiB, cobD; adenosylcobinamide-phosphate synthase [EC:6.3.1.10]	1	1	1	1	1	1	1	1	1	1	2	0	1	1	2	1	1	1	0	1	1	1	1	1	1	1	1	1	1	1	1
K02228	Metabolism of cofactors and vitamins	cobF; precorrin-6A synthase [EC:2.1.1.152]	0	0	0	0	1	0	0	0	0	0	1	0	0	0	0	0	0	0	0	0	1	1	0	0	0	0	0	0	0	0	0
K02231	Metabolism of cofactors and vitamins	cobP, cobU; adenosylcobinamide kinase / adenosylcobinamide-phosphate guanylyltransferase [EC:2.7.1.156 2.7.7.62]	1	1	1	1	1	1	1	1	1	1	1	0	1	1	1	1	1	1	0	1	1	1	1	1	1	1	1	1	1	1	1
K02231	Metabolism of cofactors and vitamins	cobP, cobU; adenosylcobinamide kinase / adenosylcobinamide-phosphate guanylyltransferase [EC:2.7.1.156 2.7.7.62]	1	1	1	1	1	1	1	1	1	1	1	0	1	1	1	1	1	1	0	1	1	1	1	1	1	1	1	1	1	1	1
K02232	Metabolism of cofactors and vitamins	cobQ, cbiP; adenosylcobyric acid synthase [EC:6.3.5.10]	1	1	2	2	3	3	2	2	2	2	2	0	1	2	2	2	2	2	1	2	2	2	2	2	2	2	2	2	2	2	2
K02232	Metabolism of cofactors and vitamins	cobQ, cbiP; adenosylcobyric acid synthase [EC:6.3.5.10]	1	1	2	2	3	3	2	2	2	2	2	0	1	2	2	2	2	2	1	2	2	2	2	2	2	2	2	2	2	2	2
K02233	Metabolism of cofactors and vitamins	E2.7.8.26, cobS, cobV; adenosylcobinamide-GDP ribazoletransferase [EC:2.7.8.26]	1	1	1	1	1	1	1	0	1	1	1	0	1	1	1	1	1	1	0	1	1	1	1	1	1	1	1	1	1	1	1
K02236	Protein families: signaling and cellular processes	comC; leader peptidase (prepilin peptidase) / N-methyltransferase [EC:3.4.23.43 2.1.1.-]	0	0	0	0	0	0	0	0	0	1	0	0	0	0	0	0	0	0	0	0	0	0	0	0	0	0	0	0	0	0	0
K02237	Protein families: signaling and cellular processes	comEA; competence protein ComEA	1	1	1	1	1	1	1	1	1	1	1	1	0	2	1	1	2	1	1	1	1	1	1	1	1	1	2	1	1	2	1
K02237	Protein families: signaling and cellular processes	comEA; competence protein ComEA	1	1	1	1	1	1	1	1	1	1	1	1	0	2	1	1	2	1	1	1	1	1	1	1	1	1	2	1	1	2	1
K02238	Protein families: signaling and cellular processes	comEC; competence protein ComEC	1	2	1	1	2	1	1	2	3	1	1	2	1	1	1	1	1	1	0	1	1	1	1	3	1	1	1	1	2	4	1
K02238	Protein families: signaling and cellular processes	comEC; competence protein ComEC	1	2	1	1	2	1	1	2	3	1	1	2	1	1	1	1	1	1	0	1	1	1	1	3	1	1	1	1	2	4	1
K02241	Protein families: signaling and cellular processes	comFB; competence protein ComFB	1	1	1	1	1	1	1	1	0	0	1	0	1	0	0	0	0	0	0	0	1	1	0	0	0	0	0	0	0	0	0
K02242	Protein families: signaling and cellular processes	comFC; competence protein ComFC	0	0	0	0	1	1	1	0	0	0	0	0	0	0	0	2	0	0	1	0	0	0	1	1	1	1	0	1	1	1	1
K02242	Protein families: signaling and cellular processes	comFC; competence protein ComFC	0	0	0	0	1	1	1	0	0	0	0	0	0	0	0	2	0	0	1	0	0	0	1	1	1	1	0	1	1	1	1
K02246	Protein families: signaling and cellular processes	comGD; competence protein ComGD	0	0	0	0	0	0	0	0	0	0	1	0	0	0	1	0	0	1	0	0	0	0	0	0	0	0	0	0	0	0	0
K02275	Energy metabolism	coxB, ctaC; cytochrome c oxidase subunit II [EC:7.1.1.9]	0	0	0	0	0	0	1	1	0	0	0	0	0	0	0	0	0	0	0	0	0	0	0	0	0	0	0	0	0	0	0
K02278	Protein families: metabolism	cpaA, tadV; prepilin peptidase CpaA [EC:3.4.23.43]	1	0	0	0	1	1	0	0	0	1	1	0	0	1	2	1	1	1	1	1	0	0	1	0	1	0	0	1	0	0	1
K02278	Protein families: metabolism	cpaA, tadV; prepilin peptidase CpaA [EC:3.4.23.43]	1	0	0	0	1	1	0	0	0	1	1	0	0	1	2	1	1	1	1	1	0	0	1	0	1	0	0	1	0	0	1
K02279	Protein families: signaling and cellular processes	cpaB, rcpC; pilus assembly protein CpaB	1	1	1	1	1	1	1	1	1	1	1	0	1	1	0	1	1	1	1	1	1	1	0	0	0	0	0	0	0	0	0
K02282	Protein families: signaling and cellular processes	cpaE, tadZ; pilus assembly protein CpaE	1	2	2	2	2	1	1	1	0	0	1	0	0	0	0	0	0	0	0	0	0	1	1	1	1	2	0	1	1	2	0
K02286	Energy metabolism	cpcC; phycocyanin-associated rod linker protein	0	1	1	0	1	0	1	1	0	0	0	1	1	0	0	0	0	0	0	0	0	0	0	1	0	0	1	0	0	0	0
K02290	Energy metabolism	cpcG; phycobilisome rod-core linker protein	0	1	1	0	1	0	1	1	0	0	0	1	1	0	0	0	0	0	0	0	0	0	0	1	0	0	1	0	0	0	0
K02302	Metabolism of cofactors and vitamins	cysG; uroporphyrin-III C-methyltransferase / precorrin-2 dehydrogenase / sirohydrochlorin ferrochelatase [EC:2.1.1.107 1.3.1.76 4.99.1.4]	0	0	0	0	1	0	0	0	0	0	0	0	0	0	0	0	0	0	0	0	0	0	0	0	0	0	0	0	0	0	0
K02303	Metabolism of cofactors and vitamins	cobA; uroporphyrin-III C-methyltransferase [EC:2.1.1.107]	1	1	1	1	1	1	1	0	0	0	0	0	1	0	0	0	0	0	0	0	0	0	0	0	2	0	0	0	0	0	2
K02304	Metabolism of cofactors and vitamins	MET8; precorrin-2 dehydrogenase / sirohydrochlorin ferrochelatase [EC:1.3.1.76 4.99.1.4]	2	2	1	2	1	3	3	0	0	0	0	0	2	0	0	0	0	0	0	0	1	1	1	1	2	1	0	1	1	1	3
K02304	Metabolism of cofactors and vitamins	MET8; precorrin-2 dehydrogenase / sirohydrochlorin ferrochelatase [EC:1.3.1.76 4.99.1.4]	2	2	1	2	1	3	3	0	0	0	0	0	2	0	0	0	0	0	0	0	1	1	1	1	2	1	0	1	1	1	3
K02313	Signal transduction	dnaA; chromosomal replication initiator protein	1	1	2	1	1	1	1	1	1	1	0	1	1	1	2	1	2	1	1	1	1	1	1	1	1	1	2	1	2	1	1
K02314	Replication and repair	dnaB; replicative DNA helicase [EC:5.6.2.3]	1	1	1	1	2	1	1	1	2	2	1	2	0	2	2	2	2	2	1	2	1	1	2	1	1	1	1	1	3	2	1
K02315	Protein families: genetic information processing	dnaC; DNA replication protein DnaC	0	0	0	0	0	0	0	0	3	0	0	0	0	0	0	1	1	4	0	1	2	1	0	0	1	10	0	0	0	0	0
K02316	Replication and repair	dnaG; DNA primase [EC:2.7.7.101]	1	1	1	1	1	1	1	1	1	1	1	1	1	1	1	1	2	1	1	1	1	1	4	1	1	1	1	1	1	4	1
K02316	Replication and repair	dnaG; DNA primase [EC:2.7.7.101]	1	1	1	1	1	1	1	1	1	1	1	1	1	1	1	1	2	1	1	1	1	1	4	1	1	1	1	1	1	4	1
K02323	Replication and repair	polB; DNA polymerase II small subunit [EC:2.7.7.7]	0	0	0	0	0	0	0	0	0	0	0	0	0	0	0	0	0	0	1	0	0	0	0	0	0	0	0	0	0	0	0
K02335	Replication and repair	polA; DNA polymerase I [EC:2.7.7.7]	1	1	1	2	1	1	1	1	1	1	1	2	1	1	1	1	1	1	0	1	1	1	2	3	2	2	2	2	2	2	2
K02335	Replication and repair	polA; DNA polymerase I [EC:2.7.7.7]	1	1	1	2	1	1	1	1	1	1	1	2	1	1	1	1	1	1	0	1	1	1	2	3	2	2	2	2	2	2	2
K02337	Replication and repair	dnaE; DNA polymerase III subunit alpha [EC:2.7.7.7]	1	1	1	1	1	1	1	2	1	1	1	2	1	1	1	1	1	1	0	1	1	1	1	1	1	1	1	1	1	2	1
K02338	Replication and repair	dnaN; DNA polymerase III subunit beta [EC:2.7.7.7]	1	1	1	1	1	1	1	1	1	1	1	1	1	1	1	1	2	1	0	1	1	1	1	1	1	1	1	1	2	1	1
K02340	Replication and repair	holA; DNA polymerase III subunit delta [EC:2.7.7.7]	0	0	0	0	0	0	0	0	1	1	1	1	0	1	1	1	1	1	0	1	0	0	0	1	0	0	0	0	1	1	1
K02341	Replication and repair	holB; DNA polymerase III subunit delta' [EC:2.7.7.7]	1	1	1	1	1	1	1	1	1	1	1	2	1	1	1	1	1	1	0	1	1	1	1	3	1	1	1	1	1	1	1
K02341	Replication and repair	holB; DNA polymerase III subunit delta' [EC:2.7.7.7]	1	1	1	1	1	1	1	1	1	1	1	2	1	1	1	1	1	1	0	1	1	1	1	3	1	1	1	1	1	1	1
K02342	Replication and repair	dnaQ; DNA polymerase III subunit epsilon [EC:2.7.7.7]	1	0	0	0	1	1	0	0	0	1	0	2	0	1	0	1	1	1	1	1	0	0	2	1	2	3	1	3	4	2	3
K02342	Replication and repair	dnaQ; DNA polymerase III subunit epsilon [EC:2.7.7.7]	1	0	0	0	1	1	0	0	0	1	0	2	0	1	0	1	1	1	1	1	0	0	2	1	2	3	1	3	4	2	3
K02343	Replication and repair	dnaX; DNA polymerase III subunit gamma/tau [EC:2.7.7.7]	1	1	1	1	1	1	1	1	1	1	1	1	1	1	1	1	1	1	0	1	1	1	1	1	1	1	0	1	1	1	1
K02343	Replication and repair	dnaX; DNA polymerase III subunit gamma/tau [EC:2.7.7.7]	1	1	1	1	1	1	1	1	1	1	1	1	1	1	1	1	1	1	0	1	1	1	1	1	1	1	0	1	1	1	1
K02346	Protein families: genetic information processing	dinB; DNA polymerase IV [EC:2.7.7.7]	0	0	0	0	0	0	0	0	0	0	0	0	0	0	0	0	0	0	0	0	0	0	1	2	2	1	1	1	0	2	1
K02347	Protein families: genetic information processing	polX, dpx; DNA polymerase (family X)	1	1	1	1	1	1	1	1	1	1	1	0	1	1	1	2	1	1	1	1	1	1	1	1	1	1	0	1	1	1	0
K02355	Protein families: genetic information processing	fusA, GFM, EFG; elongation factor G	2	2	2	4	2	2	2	3	1	2	2	2	2	2	2	2	2	2	2	2	2	2	2	2	2	2	1	8	3	2	2
K02356	Protein families: genetic information processing	efp; elongation factor P	1	1	1	1	1	1	1	0	1	1	1	1	1	1	1	1	1	1	0	1	1	1	1	1	1	1	0	1	1	2	1
K02357	Protein families: genetic information processing	tsf, TSFM; elongation factor Ts	1	1	1	1	1	1	1	1	1	1	1	1	1	1	1	1	1	1	1	1	1	1	1	1	1	1	1	1	1	1	1
K02358	Environmental adaptation	tuf, TUFM; elongation factor Tu	2	2	3	1	4	4	0	2	0	3	1	1	0	2	2	4	3	2	0	2	2	2	1	1	3	2	1	4	2	3	4
K02359	Development and regeneration	EGH; beta-1,4-mannosyltransferase [EC:2.4.1.-]	1	1	1	0	2	1	2	0	1	1	0	0	1	1	0	1	1	1	1	1	0	0	0	0	0	0	0	0	1	0	0
K02363	Metabolism of terpenoids and polyketides	entE, dhbE, vibE, mxcE; 2,3-dihydroxybenzoate---[aryl-carrier protein] ligase [EC:6.3.2.14 6.2.1.71]	0	0	0	0	0	0	0	0	0	0	0	0	0	0	0	0	0	0	0	0	0	0	0	1	0	0	0	0	0	0	0
K02371	Lipid metabolism	fabK; enoyl-[acyl-carrier protein] reductase II [EC:1.3.1.9]	1	1	1	2	1	1	1	1	1	1	1	1	1	1	1	1	1	1	1	1	1	1	1	1	1	1	2	1	1	1	1
K02372	Lipid metabolism	fabZ; 3-hydroxyacyl-[acyl-carrier-protein] dehydratase [EC:4.2.1.59]	1	1	1	1	1	1	2	2	1	1	1	1	1	1	1	1	1	0	1	1	1	1	2	1	2	2	0	2	2	2	2
K02377	Carbohydrate metabolism	TSTA3, fcl; GDP-L-fucose synthase [EC:1.1.1.271]	0	0	0	0	0	0	0	0	0	0	0	0	0	0	0	0	0	0	0	0	0	0	0	0	0	0	1	0	0	0	0
K02385	Protein families: signaling and cellular processes	fla	1	1	1	1	1	1	1	1	1	1	0	0	1	1	1	1	2	0	1	0	1	1	0	0	0	0	0	0	0	0	0
K02386	Cell motility	flgA; flagellar basal body P-ring formation protein FlgA	1	1	1	1	1	1	1	1	1	1	1	0	1	1	0	1	1	1	1	1	1	1	0	0	0	0	0	0	0	0	0
K02387	Cell motility	flgB; flagellar basal-body rod protein FlgB	1	1	1	1	1	1	1	1	1	1	1	1	1	1	1	0	1	0	1	1	1	1	0	0	0	0	0	0	0	0	0
K02388	Cell motility	flgC; flagellar basal-body rod protein FlgC	2	2	2	2	2	2	2	2	2	2	3	1	2	2	1	1	2	2	2	2	2	2	0	0	0	0	0	0	0	0	0
K02389	Cell motility	flgD; flagellar basal-body rod modification protein FlgD	1	1	1	1	2	2	1	2	1	1	2	1	1	1	1	1	1	0	1	1	2	2	0	0	0	0	0	0	0	0	0
K02390	Cell motility	flgE; flagellar hook protein FlgE	1	1	2	1	1	1	1	1	1	1	2	0	1	1	1	2	1	0	1	1	1	1	0	0	0	0	0	0	0	0	0
K02390	Cell motility	flgE; flagellar hook protein FlgE	1	1	2	1	1	1	1	1	1	1	2	0	1	1	1	2	1	0	1	1	1	1	0	0	0	0	0	0	0	0	0
K02391	Cell motility	flgF; flagellar basal-body rod protein FlgF	1	1	1	1	1	1	1	1	1	1	1	0	1	1	0	1	1	2	1	1	1	1	0	0	0	0	0	0	0	0	0
K02392	Cell motility	flgG; flagellar basal-body rod protein FlgG	2	2	2	2	2	2	2	2	2	2	2	0	2	2	0	2	2	3	2	2	2	2	0	0	0	0	0	0	0	0	0
K02392	Cell motility	flgG; flagellar basal-body rod protein FlgG	2	2	2	2	2	2	2	2	2	2	2	0	2	2	0	2	2	3	2	2	2	2	0	0	0	0	0	0	0	0	0
K02393	Cell motility	flgH; flagellar L-ring protein FlgH	1	1	1	1	1	1	1	0	1	1	1	1	1	1	0	1	1	1	1	1	1	1	0	0	0	0	0	0	0	0	0
K02394	Cell motility	flgI; flagellar P-ring protein FlgI	1	1	1	0	1	1	1	0	1	1	1	1	1	1	0	1	1	1	1	1	1	1	0	0	0	0	0	0	0	0	0
K02395	Cell motility	flgJ; peptidoglycan hydrolase FlgJ	0	0	0	0	3	0	1	0	1	1	0	0	0	1	0	1	1	1	0	1	0	0	0	0	0	0	0	0	0	0	0
K02396	Cell motility	flgK; flagellar hook-associated protein 1	1	1	1	0	1	1	1	1	1	1	2	1	1	1	0	1	1	2	1	1	1	1	0	0	0	0	0	0	0	0	0
K02396	Cell motility	flgK; flagellar hook-associated protein 1	1	1	1	0	1	1	1	1	1	1	2	1	1	1	0	1	1	2	1	1	1	1	0	0	0	0	0	0	0	0	0
K02397	Cell motility	flgL; flagellar hook-associated protein 3 FlgL	1	1	1	1	1	1	1	1	1	1	1	0	1	1	0	1	1	2	1	2	1	1	0	0	0	0	0	0	0	0	0
K02398	Signal transduction	flgM; negative regulator of flagellin synthesis FlgM	1	1	1	0	0	0	1	0	1	1	1	1	1	1	0	1	1	2	1	1	1	0	0	0	0	0	0	0	0	0	0
K02399	Cell motility	flgN; flagellar biosynthesis protein FlgN	0	1	1	0	1	0	1	0	1	1	1	1	1	1	0	1	1	2	1	1	0	0	0	0	0	0	0	0	0	0	0
K02400	Cell motility	flhA; flagellar biosynthesis protein FlhA	1	1	1	1	1	1	1	1	1	1	2	0	1	1	1	1	1	1	0	1	1	1	0	0	0	0	0	0	0	0	0
K02401	Cell motility	flhB; flagellar biosynthesis protein FlhB	1	1	1	1	1	1	1	1	1	1	1	1	1	1	1	1	1	1	0	1	1	1	0	0	0	0	0	0	0	0	0
K02405	Signal transduction	fliA, whiG; RNA polymerase sigma factor FliA	1	1	1	1	1	1	1	0	1	1	1	1	1	1	1	1	1	1	1	1	1	1	1	1	1	1	1	1	1	1	1
K02406	Signal transduction	fliC, hag; flagellin	1	1	2	1	2	0	1	2	1	0	2	0	1	0	0	2	1	1	0	1	1	1	0	0	0	0	0	0	0	0	0
K02407	Cell motility	fliD; flagellar hook-associated protein 2	2	2	3	2	3	1	2	1	1	1	1	0	1	0	0	2	1	1	0	1	1	1	0	0	1	0	0	0	0	0	1
K02408	Cell motility	fliE; flagellar hook-basal body complex protein FliE	1	1	1	1	1	1	1	1	1	1	1	1	1	1	1	0	1	0	1	1	1	1	0	0	0	0	0	0	0	0	0
K02409	Cell motility	fliF; flagellar M-ring protein FliF	1	1	1	1	1	1	1	1	1	1	2	1	1	1	1	0	1	0	1	1	1	1	0	0	0	0	0	0	0	0	0
K02410	Cell motility	fliG; flagellar motor switch protein FliG	1	1	1	2	1	1	1	1	1	1	1	1	1	1	1	0	1	0	1	1	1	1	0	0	0	0	0	0	0	0	0
K02411	Cell motility	fliH; flagellar assembly protein FliH	1	1	1	1	1	1	1	1	1	1	1	1	1	1	1	0	1	0	1	1	1	1	0	0	0	0	0	0	0	0	0
K02412	Cell motility	fliI; flagellum-specific ATP synthase [EC:7.4.2.8]	1	1	1	1	1	1	1	2	1	1	1	1	1	1	1	0	1	0	1	1	1	1	0	0	0	0	0	0	0	0	0
K02413	Cell motility	fliJ; flagellar protein FliJ	0	0	0	0	1	1	1	1	1	1	1	1	0	1	1	0	1	0	0	1	0	0	0	0	0	0	0	0	0	0	0
K02414	Cell motility	fliK; flagellar hook-length control protein FliK	1	1	1	1	1	1	1	2	1	1	1	1	1	1	1	1	1	1	1	1	1	1	1	1	1	1	1	1	1	1	1
K02415	Cell motility	fliL; flagellar protein FliL	1	1	2	1	1	1	1	0	1	1	1	1	1	1	1	1	1	1	1	1	1	1	0	0	0	0	0	0	0	0	0
K02416	Cell motility	fliM; flagellar motor switch protein FliM	1	1	1	1	1	1	1	0	1	1	1	1	1	1	1	1	2	1	1	1	1	1	0	0	0	0	0	0	0	0	0
K02417	Cell motility	fliN; flagellar motor switch protein FliN	1	1	1	1	1	1	1	1	2	1	1	1	1	1	1	1	1	1	1	1	1	1	0	0	0	0	0	0	0	0	0
K02419	Cell motility	fliP; flagellar biosynthesis protein FliP	1	1	1	1	1	1	1	1	1	1	1	2	1	1	1	1	1	1	1	1	1	1	0	0	0	0	0	0	0	0	0
K02420	Cell motility	fliQ; flagellar biosynthesis protein FliQ	1	1	1	1	1	1	1	1	1	1	1	1	1	1	1	1	1	1	1	1	1	1	0	0	0	0	0	0	0	0	0
K02421	Cell motility	fliR; flagellar biosynthesis protein FliR	1	1	1	1	1	1	1	1	1	1	1	1	1	1	1	1	1	1	1	1	1	1	0	0	0	0	0	0	0	0	0
K02422	Cell motility	fliS; flagellar secretion chaperone FliS	1	1	2	1	2	0	1	1	1	1	1	0	1	0	0	2	1	1	0	1	1	1	0	0	0	0	0	0	0	0	0
K02428	Nucleotide metabolism	#N/A	4	4	4	4	4	4	4	4	4	4	4	3	4	4	4	4	4	4	4	4	4	3	4	4	4	3	2	4	3	4	4
K02428	Nucleotide metabolism	#N/A	4	4	4	4	4	4	4	4	4	4	4	3	4	4	4	4	4	4	4	4	4	3	4	4	4	3	2	4	3	4	4
K02433	Translation	gatA, QRSL1; aspartyl-tRNA(Asn)/glutamyl-tRNA(Gln) amidotransferase subunit A [EC:6.3.5.6 6.3.5.7]	1	1	1	1	1	1	1	1	1	1	2	2	1	1	1	1	1	1	0	1	1	1	1	1	1	1	1	1	1	1	1
K02433	Translation	gatA, QRSL1; aspartyl-tRNA(Asn)/glutamyl-tRNA(Gln) amidotransferase subunit A [EC:6.3.5.6 6.3.5.7]	1	1	1	1	1	1	1	1	1	1	2	2	1	1	1	1	1	1	0	1	1	1	1	1	1	1	1	1	1	1	1
K02434	Translation	gatB, PET112; aspartyl-tRNA(Asn)/glutamyl-tRNA(Gln) amidotransferase subunit B [EC:6.3.5.6 6.3.5.7]	1	1	2	1	1	1	1	1	1	1	1	1	1	1	1	1	1	1	0	1	1	1	1	1	1	1	1	1	1	1	1
K02435	Translation	gatC, GATC; aspartyl-tRNA(Asn)/glutamyl-tRNA(Gln) amidotransferase subunit C [EC:6.3.5.6 6.3.5.7]	1	1	1	1	1	1	1	1	1	1	1	0	1	1	1	1	1	1	0	1	1	1	1	1	1	1	1	1	1	1	1
K02436	Protein families: genetic information processing	gatR; DeoR family transcriptional regulator, galactitol utilization operon repressor	0	0	1	0	0	0	0	0	0	1	0	1	0	1	0	0	0	0	0	1	0	0	0	0	0	0	0	0	0	0	0
K02437	Carbohydrate metabolism	gcvH, GCSH; glycine cleavage system H protein	1	1	1	1	1	1	1	1	2	2	1	1	1	2	0	2	2	2	0	2	2	1	2	1	2	2	1	2	2	2	2
K02438	Carbohydrate metabolism	glgX; glycogen debranching enzyme [EC:3.2.1.196]	0	0	0	0	1	1	0	0	0	0	1	0	1	0	0	0	0	0	0	0	0	0	0	0	0	0	0	0	0	0	0
K02443	Protein families: genetic information processing	glpP; glycerol uptake operon antiterminator	1	1	1	1	1	1	1	1	1	1	1	1	0	1	2	1	2	1	0	1	1	1	1	1	1	1	1	1	1	1	1
K02444	Protein families: genetic information processing	glpR; DeoR family transcriptional regulator, glycerol-3-phosphate regulon repressor	0	0	0	0	0	0	0	0	0	0	0	0	0	0	0	0	0	0	0	0	0	0	0	0	0	1	0	0	0	0	0
K02445	Protein families: signaling and cellular processes	glpT; MFS transporter, OPA family, glycerol-3-phosphate transporter	0	0	0	0	0	0	0	0	0	0	0	0	0	0	1	0	0	0	0	0	0	0	0	0	0	0	0	0	0	0	0
K02450	Protein families: signaling and cellular processes	gspA; general secretion pathway protein A	1	1	1	1	2	0	0	0	0	1	1	0	0	1	3	0	2	1	0	1	1	1	0	0	0	0	0	0	0	0	0
K02453	Membrane transport	gspD; general secretion pathway protein D	1	1	1	3	1	1	1	2	3	3	3	0	1	3	3	3	1	3	2	2	1	1	1	1	1	2	0	1	0	1	0
K02453	Membrane transport	gspD; general secretion pathway protein D	1	1	1	3	1	1	1	2	3	3	3	0	1	3	3	3	1	3	2	2	1	1	1	1	1	2	0	1	0	1	0
K02454	Membrane transport	gspE; general secretion pathway protein E [EC:7.4.2.8]	1	1	2	1	1	1	1	1	1	1	1	0	1	1	1	2	1	4	0	1	1	1	1	1	2	1	0	1	1	2	1
K02455	Membrane transport	gspF; general secretion pathway protein F	0	0	0	0	0	0	0	0	0	0	0	0	0	0	0	0	0	0	0	0	0	0	0	1	0	1	0	0	0	1	0
K02456	Membrane transport	gspG; general secretion pathway protein G	1	1	1	1	1	1	1	1	0	0	1	0	1	0	1	0	0	2	0	0	1	1	1	0	1	1	0	1	1	1	1
K02456	Membrane transport	gspG; general secretion pathway protein G	1	1	1	1	1	1	1	1	0	0	1	0	1	0	1	0	0	2	0	0	1	1	1	0	1	1	0	1	1	1	1
K02457	Membrane transport	gspH; general secretion pathway protein H	1	1	1	1	1	1	1	1	1	1	2	0	1	1	0	0	1	0	0	1	1	1	1	0	1	1	0	1	1	1	1
K02457	Membrane transport	gspH; general secretion pathway protein H	1	1	1	1	1	1	1	1	1	1	2	0	1	1	0	0	1	0	0	1	1	1	1	0	1	1	0	1	1	1	1
K02458	Membrane transport	gspI; general secretion pathway protein I	0	0	0	0	0	0	0	0	0	0	1	0	0	0	0	0	0	0	0	0	0	0	0	0	0	0	0	0	0	0	0
K02460	Membrane transport	gspK; general secretion pathway protein K	0	1	0	0	1	0	1	0	0	0	0	0	0	0	1	0	1	1	0	0	0	0	0	0	0	0	0	0	0	0	0
K02468	Protein families: genetic information processing	srlR, gutR; DeoR family transcriptional regulator, glucitol operon repressor	0	0	1	0	0	0	0	0	0	1	0	1	0	1	0	0	0	0	0	1	0	0	0	0	0	0	0	0	0	0	0
K02469	Protein families: genetic information processing	gyrA; DNA gyrase subunit A [EC:5.6.2.2]	1	1	1	2	2	1	1	1	1	1	1	0	1	1	2	1	1	1	0	1	1	1	1	2	1	1	1	2	1	1	1
K02470	Protein families: genetic information processing	gyrB; DNA gyrase subunit B [EC:5.6.2.2]	1	1	1	1	1	1	1	1	1	1	1	1	1	1	1	1	1	1	0	2	1	1	1	1	1	1	1	2	2	1	1
K02474	Carbohydrate metabolism	wbpO; UDP-N-acetyl-D-glucosamine/UDP-N-acetyl-D-galactosamine dehydrogenase [EC:1.1.1.136 1.1.1.-]	0	1	0	1	0	0	0	0	0	0	0	0	0	0	0	0	0	0	0	0	1	0	0	0	0	1	0	0	0	0	0
K02478	Protein families: metabolism	K02478; two-component system, LytTR family, sensor kinase [EC:2.7.13.3]	0	0	0	0	0	0	0	0	0	0	0	0	0	1	0	0	1	0	1	0	1	1	0	1	0	1	0	0	0	0	0
K02479	Protein families: signaling and cellular processes	K02479; two-component system, NarL family, response regulator	2	2	2	2	0	0	0	1	0	0	1	0	1	0	0	0	0	0	2	1	0	0	0	0	0	2	0	0	0	0	0
K02480	Protein families: metabolism	K02480; two-component system, NarL family, sensor kinase [EC:2.7.13.3]	0	0	0	2	1	0	0	0	0	0	0	0	0	0	0	0	1	0	0	1	0	0	0	0	0	0	0	0	0	0	0
K02481	Protein families: signaling and cellular processes	flgR; two-component system, NtrC family, response regulator	1	1	1	1	1	1	0	1	1	1	1	1	0	1	1	1	1	1	0	1	1	1	1	2	1	1	1	1	1	1	1
K02482	Protein families: metabolism	flgS; two-component system, NtrC family, sensor kinase [EC:2.7.13.3]	0	0	0	0	0	0	0	1	0	0	0	1	0	0	1	0	2	0	0	1	0	0	0	0	0	0	0	0	0	0	0
K02482	Protein families: metabolism	flgS; two-component system, NtrC family, sensor kinase [EC:2.7.13.3]	0	0	0	0	0	0	0	1	0	0	0	1	0	0	1	0	2	0	0	1	0	0	0	0	0	0	0	0	0	0	0
K02484	Protein families: metabolism	K02484; two-component system, OmpR family, sensor kinase [EC:2.7.13.3]	1	0	0	0	1	0	0	1	0	0	0	0	1	0	0	0	1	0	0	0	0	0	0	0	0	0	0	0	0	0	0
K02485	Protein families: signaling and cellular processes	rssB, hnr; two-component system, response regulator	0	0	0	0	0	0	0	0	0	0	0	0	0	0	0	0	0	0	0	0	0	0	0	0	0	0	0	0	0	1	0
K02487	#N/A	#N/A	1	0	1	0	0	0	0	0	0	0	0	0	0	0	0	0	0	0	0	0	0	0	0	0	0	0	0	0	0	0	0
K02488	Signal transduction	pleD; two-component system, cell cycle response regulator [EC:2.7.7.65]	2	0	1	1	0	0	0	1	0	0	3	0	1	0	0	0	0	0	0	0	0	0	0	0	0	0	0	0	0	0	1
K02491	Signal transduction	kinA; two-component system, sporulation sensor kinase A [EC:2.7.13.3]	0	0	0	0	0	0	0	0	0	0	0	1	0	0	0	0	0	0	0	0	0	0	0	1	0	0	0	0	0	0	0
K02492	Metabolism of cofactors and vitamins	hemA; glutamyl-tRNA reductase [EC:1.2.1.70]	1	1	1	1	1	1	1	0	0	0	0	0	0	0	0	0	0	0	0	0	0	0	0	0	1	0	0	0	0	0	1
K02493	Protein families: genetic information processing	hemK, prmC, HEMK; release factor glutamine methyltransferase [EC:2.1.1.297]	1	1	1	1	1	1	1	1	1	1	1	0	1	1	1	1	1	1	1	1	1	1	1	1	1	1	1	1	0	1	1
K02498	Unclassified: metabolism	hemY; HemY protein	0	0	0	0	0	0	1	0	0	0	0	0	0	0	0	0	0	0	0	0	0	0	0	1	0	1	1	0	0	0	0
K02499	Protein families: genetic information processing	yabN; tetrapyrrole methylase family protein / MazG family protein	1	1	1	1	1	1	1	1	1	1	1	0	1	1	1	1	1	1	1	1	1	1	1	1	1	1	1	1	1	1	1
K02500	Amino acid metabolism	hisF; imidazole glycerol-phosphate synthase subunit HisF [EC:4.3.2.10]	1	1	1	1	1	1	1	1	1	1	1	1	1	1	1	1	1	1	1	1	1	1	1	1	1	1	1	1	1	1	1
K02500	Amino acid metabolism	hisF; imidazole glycerol-phosphate synthase subunit HisF [EC:4.3.2.10]	1	1	1	1	1	1	1	1	1	1	1	1	1	1	1	1	1	1	1	1	1	1	1	1	1	1	1	1	1	1	1
K02501	Amino acid metabolism	hisH; imidazole glycerol-phosphate synthase subunit HisH [EC:4.3.2.10]	1	1	1	1	2	1	1	1	1	1	1	1	1	1	1	1	1	1	1	1	1	1	1	1	1	1	1	1	1	1	1
K02502	Amino acid metabolism	hisZ; ATP phosphoribosyltransferase regulatory subunit	2	2	2	3	2	2	2	0	2	2	2	0	1	3	2	2	2	2	0	2	2	2	1	3	3	2	0	3	1	2	1
K02504	Protein families: signaling and cellular processes	hofB; protein transport protein HofB	0	0	0	0	0	0	0	0	0	0	0	0	0	0	1	0	0	0	0	0	0	0	0	0	0	0	0	0	0	0	0
K02505	Protein families: signaling and cellular processes	hofC; protein transport protein HofC	0	0	0	0	0	0	0	0	0	0	0	0	0	0	0	0	0	0	0	0	0	0	0	1	0	1	0	0	0	1	0
K02507	Protein families: signaling and cellular processes	hofQ; protein transport protein HofQ	1	1	0	1	1	1	1	1	1	1	1	0	1	1	3	2	1	2	1	1	1	1	1	1	1	2	0	1	0	1	0
K02508	Protein families: genetic information processing	hpaA; AraC family transcriptional regulator, 4-hydroxyphenylacetate 3-monooxygenase operon regulatory protein	0	0	1	1	0	0	0	0	0	0	0	0	0	0	0	0	0	0	0	0	0	0	0	0	0	0	0	0	0	0	0
K02510	Amino acid metabolism	hpaI, hpcH; 4-hydroxy-2-oxoheptanedioate aldolase [EC:4.1.2.52]	0	0	0	0	0	0	1	1	1	1	1	1	0	1	0	1	2	1	1	1	0	0	1	1	1	1	0	1	1	1	1
K02517	Glycan biosynthesis and metabolism	lpxL, htrB; Kdo2-lipid IVA lauroyltransferase/acyltransferase [EC:2.3.1.241 2.3.1.-]	0	0	0	0	0	0	0	0	2	2	0	1	0	2	0	2	1	2	1	2	1	1	0	1	0	0	0	0	0	0	0
K02518	Protein families: genetic information processing	infA; translation initiation factor IF-1	1	1	1	1	1	1	1	1	1	1	1	1	1	1	1	1	1	1	1	1	1	1	1	1	1	1	1	1	1	1	1
K02519	Protein families: genetic information processing	infB, MTIF2; translation initiation factor IF-2	1	1	1	2	1	1	1	1	1	1	1	1	1	1	1	1	1	1	0	1	1	1	1	1	1	1	1	1	1	1	1
K02520	Protein families: genetic information processing	infC, MTIF3; translation initiation factor IF-3	1	1	1	1	1	1	1	1	1	1	1	1	1	1	1	1	1	1	1	1	1	1	1	1	1	1	0	1	1	1	1
K02523	Metabolism of terpenoids and polyketides	ispB; octaprenyl-diphosphate synthase [EC:2.5.1.90]	1	1	1	1	1	1	1	1	1	1	1	1	1	1	1	1	1	1	0	1	0	0	1	1	1	1	0	1	1	1	1
K02525	Protein families: genetic information processing	kdgR; LacI family transcriptional regulator, kdg operon repressor	0	0	0	0	0	0	0	0	0	1	0	0	0	0	0	0	0	0	0	0	0	0	0	0	0	0	0	0	0	0	0
K02527	Glycan biosynthesis and metabolism	kdtA, waaA; 3-deoxy-D-manno-octulosonic-acid transferase [EC:2.4.99.12 2.4.99.13 2.4.99.14 2.4.99.15]	0	0	0	0	0	0	0	0	1	1	0	0	0	1	0	1	0	1	1	1	0	0	0	0	0	0	0	0	0	0	0
K02528	Protein families: genetic information processing	ksgA; 16S rRNA (adenine1518-N6/adenine1519-N6)-dimethyltransferase [EC:2.1.1.182]	2	2	2	2	2	2	1	1	2	2	2	2	2	3	2	2	2	3	2	2	2	2	2	3	2	2	1	2	2	2	2
K02528	Protein families: genetic information processing	ksgA; 16S rRNA (adenine1518-N6/adenine1519-N6)-dimethyltransferase [EC:2.1.1.182]	2	2	2	2	2	2	1	1	2	2	2	2	2	3	2	2	2	3	2	2	2	2	2	3	2	2	1	2	2	2	2
K02529	Protein families: genetic information processing	lacI, galR; LacI family transcriptional regulator	15	16	15	23	19	13	21	11	9	11	14	11	13	10	4	5	12	5	5	11	12	15	10	11	15	19	6	9	8	9	12
K02529	Protein families: genetic information processing	lacI, galR; LacI family transcriptional regulator	15	16	15	23	19	13	21	11	9	11	14	11	13	10	4	5	12	5	5	11	12	15	10	11	15	19	6	9	8	9	12
K02535	Glycan biosynthesis and metabolism	lpxC; UDP-3-O-[3-hydroxymyristoyl] N-acetylglucosamine deacetylase [EC:3.5.1.108]	1	1	1	1	1	1	1	1	1	1	1	1	1	1	2	1	1	1	1	1	1	1	1	1	1	1	1	1	1	1	1
K02535	Glycan biosynthesis and metabolism	lpxC; UDP-3-O-[3-hydroxymyristoyl] N-acetylglucosamine deacetylase [EC:3.5.1.108]	1	1	1	1	1	1	1	1	1	1	1	1	1	1	2	1	1	1	1	1	1	1	1	1	1	1	1	1	1	1	1
K02536	Glycan biosynthesis and metabolism	lpxD; UDP-3-O-[3-hydroxymyristoyl] glucosamine N-acyltransferase [EC:2.3.1.191]	1	1	1	1	1	1	1	1	1	1	1	1	1	1	2	1	1	1	1	1	1	1	1	1	1	1	1	1	1	1	1
K02554	Amino acid metabolism	mhpD; 2-keto-4-pentenoate hydratase [EC:4.2.1.80]	0	0	0	0	0	0	0	0	0	0	0	0	0	0	0	0	0	0	0	0	0	0	0	0	0	1	0	0	1	1	0
K02556	Signal transduction	motA; chemotaxis protein MotA	1	1	1	1	1	1	1	1	1	2	1	0	1	2	1	1	1	0	1	1	1	1	0	0	0	0	0	0	0	0	0
K02557	Cell motility	motB; chemotaxis protein MotB	2	1	1	2	1	1	1	0	1	1	1	1	1	1	1	1	1	1	1	1	1	1	0	0	0	0	0	0	0	0	0
K02557	Cell motility	motB; chemotaxis protein MotB	2	1	1	2	1	1	1	0	1	1	1	1	1	1	1	1	1	1	1	1	1	1	0	0	0	0	0	0	0	0	0
K02560	Glycan biosynthesis and metabolism	lpxM, msbB; lauroyl-Kdo2-lipid IVA myristoyltransferase [EC:2.3.1.243]	1	1	1	1	1	1	1	1	1	1	1	1	1	1	0	1	1	1	0	1	1	1	2	2	1	1	1	1	1	1	1
K02560	Glycan biosynthesis and metabolism	lpxM, msbB; lauroyl-Kdo2-lipid IVA myristoyltransferase [EC:2.3.1.243]	1	1	1	1	1	1	1	1	1	1	1	1	1	1	0	1	1	1	0	1	1	1	2	2	1	1	1	1	1	1	1
K02563	Glycan biosynthesis and metabolism	murG; UDP-N-acetylglucosamine--N-acetylmuramyl-(pentapeptide) pyrophosphoryl-undecaprenol N-acetylglucosamine transferase [EC:2.4.1.227]	1	1	1	1	1	1	1	1	1	1	1	1	1	1	1	1	1	1	0	1	1	1	1	1	1	1	1	1	1	1	1
K02564	Carbohydrate metabolism	nagB, GNPDA; glucosamine-6-phosphate deaminase [EC:3.5.99.6]	1	1	1	1	1	1	1	2	1	1	1	1	1	1	0	1	0	1	1	1	1	2	2	3	2	2	2	2	2	2	2
K02565	Protein families: genetic information processing	nagC; N-acetylglucosamine repressor	0	0	0	0	0	0	0	0	1	1	0	0	0	1	0	0	0	0	0	1	0	1	3	2	3	2	2	2	3	3	3
K02566	Unclassified: metabolism	nagD; 5'-nucleotidase [EC:3.1.3.5]	2	3	3	2	3	2	2	3	2	3	1	3	2	2	3	2	3	2	2	3	2	2	2	3	3	2	1	2	2	2	2
K02566	Unclassified: metabolism	nagD; 5'-nucleotidase [EC:3.1.3.5]	2	3	3	2	3	2	2	3	2	3	1	3	2	2	3	2	3	2	2	3	2	2	2	3	3	2	1	2	2	2	2
K02572	Unclassified: metabolism	napF; ferredoxin-type protein NapF	2	2	3	2	2	2	4	3	1	1	1	1	1	1	0	1	1	1	1	1	2	2	3	2	4	3	2	3	3	4	3
K02572	Unclassified: metabolism	napF; ferredoxin-type protein NapF	2	2	3	2	2	2	4	3	1	1	1	1	1	1	0	1	1	1	1	1	2	2	3	2	4	3	2	3	3	4	3
K02573	Unclassified: metabolism	napG; ferredoxin-type protein NapG	0	0	1	0	0	0	1	2	0	0	0	0	1	0	0	0	0	0	0	0	1	1	0	0	0	0	0	0	0	0	0
K02574	Unclassified: metabolism	napH; ferredoxin-type protein NapH	0	0	1	0	0	0	0	1	0	0	0	0	1	0	0	0	0	0	0	0	1	1	0	0	0	0	0	0	0	0	0
K02575	Energy metabolism	NRT, narK, nrtP, nasA; MFS transporter, NNP family, nitrate/nitrite transporter	1	1	1	1	0	1	1	1	1	1	1	1	1	1	0	1	1	1	0	1	1	1	2	1	1	1	0	2	2	1	2
K02584	Signal transduction	nifA; Nif-specific regulatory protein	1	1	1	1	1	1	1	1	0	0	1	0	1	0	0	0	0	0	0	0	1	1	1	1	1	1	0	1	1	1	1
K02589	Unclassified: genetic information processing	nifHD1, nifI1; nitrogen regulatory protein PII 1	0	1	1	1	1	0	1	1	0	0	0	0	1	0	0	0	0	0	0	0	1	1	0	0	0	0	0	0	0	0	0
K02590	Unclassified: genetic information processing	nifHD2, nifI2; nitrogen regulatory protein PII 2	0	1	1	1	1	0	1	1	0	0	0	0	1	0	0	0	0	0	0	0	1	1	0	0	0	0	0	0	0	0	0
K02594	Carbohydrate metabolism	nifV; homocitrate synthase NifV [EC:2.3.3.14]	1	1	1	0	1	1	1	1	1	1	1	1	0	1	1	1	1	1	1	1	1	1	1	1	1	1	0	1	1	1	1
K02600	Protein families: genetic information processing	nusA; transcription termination/antitermination protein NusA	2	2	2	2	2	2	2	3	1	2	2	2	2	1	2	1	2	2	0	1	2	2	2	2	2	2	2	2	3	2	2
K02600	Protein families: genetic information processing	nusA; transcription termination/antitermination protein NusA	2	2	2	2	2	2	2	3	1	2	2	2	2	1	2	1	2	2	0	1	2	2	2	2	2	2	2	2	3	2	2
K02601	Protein families: genetic information processing	nusG; transcription termination/antitermination protein NusG	1	1	1	1	1	1	1	1	1	1	1	1	0	1	1	1	1	1	1	1	1	1	1	1	1	1	0	1	1	2	1
K02614	Amino acid metabolism	paaI; acyl-CoA thioesterase [EC:3.1.2.-]	1	1	1	1	1	1	1	0	0	0	1	0	1	0	0	0	0	0	0	0	1	1	0	0	0	0	0	0	0	0	0
K02622	Protein families: genetic information processing	parE; topoisomerase IV subunit B [EC:5.6.2.2]	0	0	0	0	0	0	0	0	0	0	0	0	0	0	0	0	0	0	0	0	0	0	0	0	0	0	0	1	0	0	0
K02630	Energy metabolism	pecC; phycoerythrocyanin-associated rod linker protein	0	1	1	0	1	0	1	1	0	0	0	1	1	0	0	0	0	0	0	0	0	0	0	1	0	0	1	0	0	0	0
K02650	Signal transduction	pilA; type IV pilus assembly protein PilA	1	0	1	1	1	1	1	1	1	1	0	0	1	1	1	1	0	1	0	1	1	1	1	0	1	1	0	1	1	1	1
K02650	Signal transduction	pilA; type IV pilus assembly protein PilA	1	0	1	1	1	1	1	1	1	1	0	0	1	1	1	1	0	1	0	1	1	1	1	0	1	1	0	1	1	1	1
K02652	Protein families: signaling and cellular processes	pilB; type IV pilus assembly protein PilB	2	2	4	2	2	2	1	2	2	1	2	0	2	1	1	2	2	5	0	1	2	2	1	1	3	1	0	1	1	2	1
K02652	Protein families: signaling and cellular processes	pilB; type IV pilus assembly protein PilB	2	2	4	2	2	2	1	2	2	1	2	0	2	1	1	2	2	5	0	1	2	2	1	1	3	1	0	1	1	2	1
K02653	Protein families: signaling and cellular processes	pilC; type IV pilus assembly protein PilC	1	1	1	1	1	1	1	1	1	1	1	0	1	0	0	1	1	3	1	2	1	1	1	1	1	1	0	1	1	2	1
K02653	Protein families: signaling and cellular processes	pilC; type IV pilus assembly protein PilC	1	1	1	1	1	1	1	1	1	1	1	0	1	0	0	1	1	3	1	2	1	1	1	1	1	1	0	1	1	2	1
K02654	Protein families: metabolism	pilD, pppA; leader peptidase (prepilin peptidase) / N-methyltransferase [EC:3.4.23.43 2.1.1.-]	1	1	0	1	1	1	1	1	1	1	1	0	1	1	2	1	1	2	1	1	1	1	1	0	1	1	0	1	0	1	1
K02654	Protein families: metabolism	pilD, pppA; leader peptidase (prepilin peptidase) / N-methyltransferase [EC:3.4.23.43 2.1.1.-]	1	1	0	1	1	1	1	1	1	1	1	0	1	1	2	1	1	2	1	1	1	1	1	0	1	1	0	1	0	1	1
K02655	Protein families: signaling and cellular processes	pilE; type IV pilus assembly protein PilE	0	0	0	0	0	0	1	0	0	0	0	0	0	0	0	0	0	1	0	0	0	0	0	0	0	0	0	0	0	0	0
K02656	Protein families: signaling and cellular processes	pilF; type IV pilus assembly protein PilF	0	0	0	0	0	0	0	0	0	0	0	0	0	0	0	0	0	0	0	0	0	0	1	0	0	0	0	0	0	0	0
K02660	Signal transduction	pilJ; twitching motility protein PilJ	0	0	0	3	0	0	0	1	0	2	1	0	1	2	0	2	0	2	0	1	3	1	0	1	3	1	1	1	2	2	1
K02660	Signal transduction	pilJ; twitching motility protein PilJ	0	0	0	3	0	0	0	1	0	2	1	0	1	2	0	2	0	2	0	1	3	1	0	1	3	1	1	1	2	2	1
K02662	Protein families: signaling and cellular processes	pilM; type IV pilus assembly protein PilM	1	1	1	1	1	1	1	1	1	1	1	0	1	2	3	1	1	2	0	1	1	1	1	0	1	1	0	1	2	1	1
K02664	Protein families: signaling and cellular processes	pilO; type IV pilus assembly protein PilO	0	1	1	0	1	0	0	0	1	0	1	0	0	1	3	1	0	2	1	1	1	1	0	0	0	1	0	0	0	0	0
K02666	Protein families: signaling and cellular processes	pilQ; type IV pilus assembly protein PilQ	3	3	4	3	1	1	1	3	1	1	3	0	2	1	3	2	1	2	1	1	1	1	1	4	3	3	0	1	2	3	1
K02666	Protein families: signaling and cellular processes	pilQ; type IV pilus assembly protein PilQ	3	3	4	3	1	1	1	3	1	1	3	0	2	1	3	2	1	2	1	1	1	1	1	4	3	3	0	1	2	3	1
K02667	Signal transduction	pilR, pehR; two-component system, NtrC family, response regulator PilR	0	0	0	0	0	0	0	0	0	0	0	0	1	0	0	0	0	0	0	0	0	0	0	0	0	0	0	0	1	1	0
K02668	Signal transduction	pilS, pehS; two-component system, NtrC family, sensor histidine kinase PilS [EC:2.7.13.3]	0	0	0	0	0	0	0	0	0	0	0	0	0	0	0	0	0	0	0	0	0	0	0	1	0	0	0	0	0	0	0
K02669	Protein families: signaling and cellular processes	pilT; twitching motility protein PilT	1	1	1	1	1	1	1	1	1	1	1	0	1	0	0	2	1	3	1	1	1	1	1	1	1	1	0	1	1	1	1
K02669	Protein families: signaling and cellular processes	pilT; twitching motility protein PilT	1	1	1	1	1	1	1	1	1	1	1	0	1	0	0	2	1	3	1	1	1	1	1	1	1	1	0	1	1	1	1
K02672	Protein families: signaling and cellular processes	pilW; type IV pilus assembly protein PilW	0	0	0	0	0	0	0	0	0	0	0	0	0	0	0	0	0	0	0	0	0	0	0	0	1	0	0	0	0	0	0
K02687	Protein families: genetic information processing	prmA; ribosomal protein L11 methyltransferase [EC:2.1.1.-]	1	1	1	1	1	1	1	1	1	1	0	0	1	1	1	1	1	1	1	1	2	1	1	1	1	1	0	1	1	1	1
K02775	Carbohydrate metabolism	gatC, sgcC; galactitol PTS system EIIC component	0	0	0	0	0	0	0	0	0	0	0	0	0	0	0	0	0	0	0	0	1	1	0	0	0	0	0	0	0	0	0
K02823	Nucleotide metabolism	pyrDII; dihydroorotate dehydrogenase electron transfer subunit	5	5	6	4	4	5	4	5	4	4	5	0	5	4	3	5	4	4	4	4	6	5	4	4	4	4	2	4	4	5	4
K02823	Nucleotide metabolism	pyrDII; dihydroorotate dehydrogenase electron transfer subunit	5	5	6	4	4	5	4	5	4	4	5	0	5	4	3	5	4	4	4	4	6	5	4	4	4	4	2	4	4	5	4
K02834	Protein families: genetic information processing	rbfA; ribosome-binding factor A	1	1	1	1	1	1	1	1	1	1	1	1	1	1	1	1	1	1	0	1	1	1	1	1	1	1	1	1	1	1	1
K02835	Protein families: genetic information processing	prfA, MTRF1, MRF1; peptide chain release factor 1	1	1	1	1	1	1	1	1	1	1	1	0	1	1	1	1	1	1	1	1	1	1	1	1	1	1	1	1	1	1	1
K02836	Protein families: genetic information processing	prfB; peptide chain release factor 2	1	1	1	1	1	1	1	1	1	1	1	0	1	1	1	1	1	1	1	1	1	1	1	1	1	1	1	1	2	1	1
K02838	Protein families: genetic information processing	frr, MRRF, RRF; ribosome recycling factor	1	1	1	1	1	1	1	1	1	1	1	1	1	1	1	1	1	1	1	1	1	1	1	1	1	1	1	1	1	1	1
K02841	Glycan biosynthesis and metabolism	waaC, rfaC; lipopolysaccharide heptosyltransferase I [EC:2.4.99.23]	0	0	0	0	0	0	0	0	0	0	0	0	0	0	0	0	0	0	0	0	0	0	0	0	1	0	0	0	0	0	0
K02843	Glycan biosynthesis and metabolism	waaF, rfaF; lipopolysaccharide heptosyltransferase II [EC:2.4.99.24]	0	0	0	0	0	0	0	0	0	0	0	0	0	0	0	0	0	0	0	0	0	0	0	0	1	0	0	0	0	0	0
K02847	Glycan biosynthesis and metabolism	waaL, rfaL; O-antigen ligase [EC:2.4.1.-]	0	0	0	0	0	0	0	0	0	0	1	0	0	0	0	0	0	0	0	0	0	0	0	0	0	0	0	0	0	0	0
K02849	Glycan biosynthesis and metabolism	waaQ, rfaQ; lipopolysaccharide heptosyltransferase III [EC:2.4.99.25]	0	0	0	0	0	0	0	0	0	0	0	0	0	0	0	0	0	0	0	0	0	0	0	0	1	0	0	0	0	0	0
K02851	Glycan biosynthesis and metabolism	wecA, tagO, rfe; UDP-GlcNAc:undecaprenyl-phosphate/decaprenyl-phosphate GlcNAc-1-phosphate transferase [EC:2.7.8.33 2.7.8.35]	1	1	1	1	1	1	1	1	2	2	1	0	1	2	1	2	3	2	1	2	1	1	2	1	2	1	1	2	2	3	2
K02851	Glycan biosynthesis and metabolism	wecA, tagO, rfe; UDP-GlcNAc:undecaprenyl-phosphate/decaprenyl-phosphate GlcNAc-1-phosphate transferase [EC:2.7.8.33 2.7.8.35]	1	1	1	1	1	1	1	1	2	2	1	0	1	2	1	2	3	2	1	2	1	1	2	1	2	1	1	2	2	3	2
K02852	Protein families: metabolism	wecG, rffM; UDP-N-acetyl-D-mannosaminouronate:lipid I N-acetyl-D-mannosaminouronosyltransferase [EC:2.4.1.180]	0	1	1	0	1	0	1	0	0	0	0	0	1	0	0	0	0	0	0	0	0	0	1	1	1	0	1	1	1	1	1
K02860	Protein families: genetic information processing	rimM; 16S rRNA processing protein RimM	1	1	1	1	1	1	1	1	1	1	1	0	1	1	1	1	2	1	1	1	1	1	1	1	1	1	1	1	1	1	1
K02863	Translation	RP-L1, MRPL1, rplA; large subunit ribosomal protein L1	1	1	1	1	1	1	1	1	1	1	1	1	1	1	1	1	1	1	1	1	1	1	1	1	1	1	0	1	1	1	1
K02864	Translation	RP-L10, MRPL10, rplJ; large subunit ribosomal protein L10	1	1	1	1	1	1	1	1	1	1	1	1	1	1	1	1	1	1	1	1	1	1	1	1	1	1	0	1	1	1	1
K02867	Translation	RP-L11, MRPL11, rplK; large subunit ribosomal protein L11	1	1	1	1	1	1	1	1	1	1	1	1	0	1	1	1	1	1	1	1	1	1	1	1	1	1	0	1	1	1	1
K02871	Translation	RP-L13, MRPL13, rplM; large subunit ribosomal protein L13	1	1	2	1	1	1	1	1	1	1	1	1	1	1	1	1	1	1	1	1	1	1	1	1	1	1	1	1	1	1	1
K02873	Translation	RP-L13e, RPL13; large subunit ribosomal protein L13e	0	0	0	0	0	0	0	0	0	2	0	0	0	0	0	1	0	0	0	0	0	0	0	0	0	0	0	0	0	0	0
K02874	Translation	RP-L14, MRPL14, rplN; large subunit ribosomal protein L14	1	1	1	1	1	1	1	1	1	1	1	1	1	1	1	1	1	1	1	1	1	1	1	1	1	1	1	1	1	1	1
K02876	Translation	RP-L15, MRPL15, rplO; large subunit ribosomal protein L15	1	1	1	1	1	1	1	1	1	1	1	1	1	1	1	1	1	1	1	1	1	1	1	1	1	1	1	1	1	1	1
K02878	Translation	RP-L16, MRPL16, rplP; large subunit ribosomal protein L16	1	1	1	1	1	1	1	1	1	1	1	1	1	1	1	1	1	1	1	1	1	1	1	1	1	1	1	1	1	1	1
K02879	Translation	RP-L17, MRPL17, rplQ; large subunit ribosomal protein L17	1	1	1	1	1	1	1	0	1	1	1	1	1	1	1	1	1	1	1	1	1	1	1	1	1	1	1	1	1	1	1
K02881	Translation	RP-L18, MRPL18, rplR; large subunit ribosomal protein L18	1	1	1	1	1	1	1	0	1	1	1	1	1	1	1	1	1	1	1	1	1	1	1	1	1	1	1	1	1	1	1
K02884	Translation	RP-L19, MRPL19, rplS; large subunit ribosomal protein L19	1	1	1	1	1	1	1	1	2	1	1	1	1	1	1	1	1	1	1	1	1	1	1	1	1	1	1	1	1	1	1
K02886	Translation	RP-L2, MRPL2, rplB; large subunit ribosomal protein L2	1	1	1	1	1	1	1	1	1	1	1	1	1	1	1	1	1	1	1	1	1	1	1	1	1	1	1	1	1	1	1
K02887	Translation	RP-L20, MRPL20, rplT; large subunit ribosomal protein L20	1	1	1	1	1	1	1	1	2	2	1	1	1	2	2	2	1	2	1	2	1	1	2	2	2	2	1	2	2	2	2
K02888	Translation	RP-L21, MRPL21, rplU; large subunit ribosomal protein L21	1	1	1	1	1	1	1	1	1	1	1	1	1	1	1	1	1	1	1	1	1	1	1	0	1	1	1	1	1	1	1
K02890	Translation	RP-L22, MRPL22, rplV; large subunit ribosomal protein L22	1	1	1	1	1	1	1	1	1	1	1	1	1	1	1	1	1	1	1	1	1	1	1	1	1	1	1	1	2	1	1
K02892	Translation	RP-L23, MRPL23, rplW; large subunit ribosomal protein L23	1	1	1	1	1	1	1	1	1	1	1	1	0	1	1	1	1	1	0	1	1	1	1	1	1	1	1	1	1	1	1
K02895	Translation	RP-L24, MRPL24, rplX; large subunit ribosomal protein L24	1	1	1	1	1	1	1	1	1	1	1	1	1	1	1	1	1	1	1	1	1	1	1	1	1	1	1	1	1	1	1
K02897	Translation	RP-L25, rplY; large subunit ribosomal protein L25	1	1	1	0	1	1	1	1	1	1	1	1	1	1	1	1	1	1	1	1	1	1	1	1	1	1	1	1	1	2	1
K02899	Translation	RP-L27, MRPL27, rpmA; large subunit ribosomal protein L27	1	1	1	1	1	1	1	1	1	1	1	1	1	1	1	1	1	1	1	1	1	1	1	0	1	1	1	1	1	1	1
K02902	Translation	RP-L28, MRPL28, rpmB; large subunit ribosomal protein L28	1	0	0	0	0	0	1	1	1	1	1	0	0	1	0	1	1	1	1	1	1	1	1	0	1	0	1	0	0	0	0
K02904	Translation	RP-L29, rpmC; large subunit ribosomal protein L29	1	1	1	1	1	1	1	2	1	1	1	1	1	1	1	1	1	1	1	1	1	1	1	1	1	1	1	1	1	1	1
K02906	Translation	RP-L3, MRPL3, rplC; large subunit ribosomal protein L3	1	1	1	1	1	1	1	1	1	1	1	1	0	1	1	1	1	1	0	1	1	1	1	1	1	1	1	1	1	2	1
K02907	Translation	RP-L30, MRPL30, rpmD; large subunit ribosomal protein L30	1	1	1	1	1	1	1	1	1	1	1	1	1	1	1	1	1	1	1	1	1	1	1	1	1	1	1	1	1	1	1
K02909	Translation	RP-L31, rpmE; large subunit ribosomal protein L31	1	1	1	1	1	1	1	1	1	1	1	0	1	1	1	1	3	1	1	1	1	1	1	1	1	1	1	1	1	1	1
K02911	Translation	RP-L32, MRPL32, rpmF; large subunit ribosomal protein L32	0	1	1	0	0	0	1	0	1	1	0	1	0	1	1	1	1	1	1	1	0	0	1	0	1	1	1	1	1	1	1
K02913	Translation	RP-L33, MRPL33, rpmG; large subunit ribosomal protein L33	1	1	0	1	1	0	1	1	0	0	1	0	0	0	0	0	0	0	0	0	1	1	1	0	1	1	0	1	1	1	1
K02914	Translation	RP-L34, MRPL34, rpmH; large subunit ribosomal protein L34	0	0	0	0	0	0	0	0	0	0	0	0	0	0	0	0	0	0	0	0	0	0	1	0	1	1	1	1	1	1	1
K02916	Translation	RP-L35, MRPL35, rpmI; large subunit ribosomal protein L35	1	1	1	1	1	1	1	1	1	1	1	1	1	1	1	1	1	1	1	1	1	1	1	1	1	1	0	1	1	1	1
K02919	Translation	RP-L36, MRPL36, rpmJ; large subunit ribosomal protein L36	0	0	0	0	0	0	0	1	1	1	0	1	0	1	1	1	1	1	1	1	0	0	0	1	0	0	0	0	0	0	0
K02926	Translation	RP-L4, MRPL4, rplD; large subunit ribosomal protein L4	1	1	1	1	1	1	1	1	1	1	1	1	0	1	1	1	1	1	0	1	1	1	1	1	1	1	1	1	1	1	1
K02931	Translation	RP-L5, MRPL5, rplE; large subunit ribosomal protein L5	1	1	1	1	1	1	1	1	1	1	1	1	1	1	1	1	1	1	1	1	1	1	1	1	1	1	1	1	1	1	1
K02933	Translation	RP-L6, MRPL6, rplF; large subunit ribosomal protein L6	1	1	1	1	1	1	1	0	1	1	1	1	1	1	1	1	1	1	1	1	1	1	1	1	1	1	1	1	1	1	1
K02935	Translation	RP-L7, MRPL12, rplL; large subunit ribosomal protein L7/L12	2	2	2	2	2	2	2	2	2	2	2	2	2	2	2	2	2	2	2	2	2	2	2	2	2	2	0	2	2	2	2
K02935	Translation	RP-L7, MRPL12, rplL; large subunit ribosomal protein L7/L12	2	2	2	2	2	2	2	2	2	2	2	2	2	2	2	2	2	2	2	2	2	2	2	2	2	2	0	2	2	2	2
K02939	Translation	RP-L9, MRPL9, rplI; large subunit ribosomal protein L9	1	1	1	1	1	1	1	1	1	1	1	1	0	1	1	1	1	1	0	1	1	1	1	1	1	1	1	1	1	1	1
K02945	Translation	RP-S1, rpsA; small subunit ribosomal protein S1	4	4	4	4	3	3	3	5	4	4	4	5	4	4	6	4	4	5	0	4	3	3	3	4	3	3	5	3	3	4	3
K02945	Translation	RP-S1, rpsA; small subunit ribosomal protein S1	4	4	4	4	3	3	3	5	4	4	4	5	4	4	6	4	4	5	0	4	3	3	3	4	3	3	5	3	3	4	3
K02946	Translation	RP-S10, MRPS10, rpsJ; small subunit ribosomal protein S10	1	1	1	1	1	1	1	1	1	1	1	1	0	1	1	1	1	1	0	1	1	1	1	1	1	1	1	1	1	1	1
K02948	Translation	RP-S11, MRPS11, rpsK; small subunit ribosomal protein S11	1	1	1	1	1	1	1	1	1	1	1	1	1	1	1	1	1	1	1	1	1	1	1	1	1	1	1	1	1	1	1
K02950	Translation	RP-S12, MRPS12, rpsL; small subunit ribosomal protein S12	1	1	1	1	1	1	1	1	1	1	1	1	1	1	1	1	1	1	0	1	1	1	1	1	1	1	0	1	1	2	1
K02952	Translation	RP-S13, rpsM; small subunit ribosomal protein S13	1	1	1	1	1	1	1	1	1	1	1	1	1	1	1	1	1	1	1	1	1	1	1	1	1	1	1	1	1	1	1
K02954	Translation	RP-S14, MRPS14, rpsN; small subunit ribosomal protein S14	1	1	1	1	1	1	1	1	1	1	1	1	1	1	1	1	1	1	1	1	1	1	1	1	1	1	1	1	1	1	1
K02956	Translation	RP-S15, MRPS15, rpsO; small subunit ribosomal protein S15	1	1	1	1	1	1	1	1	1	1	1	1	1	1	1	1	1	1	0	1	1	1	1	1	1	1	1	1	1	1	1
K02959	Translation	RP-S16, MRPS16, rpsP; small subunit ribosomal protein S16	1	1	1	1	1	1	1	1	1	1	1	1	1	1	1	1	1	1	1	1	1	1	1	1	1	1	1	1	1	1	1
K02961	Translation	RP-S17, MRPS17, rpsQ; small subunit ribosomal protein S17	1	1	1	1	1	1	1	1	1	1	1	1	1	1	1	1	1	1	1	1	1	1	1	1	1	1	1	1	1	1	1
K02963	Translation	RP-S18, MRPS18, rpsR; small subunit ribosomal protein S18	1	1	1	1	1	1	1	1	1	1	1	1	1	1	1	1	1	1	0	1	1	1	1	1	1	1	1	1	1	1	1
K02965	Translation	RP-S19, rpsS; small subunit ribosomal protein S19	1	1	1	1	1	1	1	1	1	1	1	1	1	1	1	1	1	1	1	1	1	1	1	1	1	1	1	1	1	1	1
K02967	Translation	RP-S2, MRPS2, rpsB; small subunit ribosomal protein S2	1	1	1	1	1	1	1	0	1	1	1	1	0	1	1	1	1	1	1	1	1	1	1	1	1	1	1	1	1	1	1
K02968	Translation	RP-S20, rpsT; small subunit ribosomal protein S20	1	2	2	1	1	1	1	0	1	1	1	1	1	1	1	1	1	1	0	1	1	1	1	1	1	1	0	1	1	1	1
K02970	Translation	RP-S21, MRPS21, rpsU; small subunit ribosomal protein S21	1	1	1	1	1	1	0	1	0	0	0	0	1	0	0	0	0	0	0	0	0	0	0	0	0	0	0	0	0	0	0
K02982	Translation	RP-S3, rpsC; small subunit ribosomal protein S3	1	1	1	1	1	1	1	1	1	1	1	1	1	1	2	1	1	1	1	1	1	1	1	1	1	1	1	1	1	1	1
K02986	Translation	RP-S4, rpsD; small subunit ribosomal protein S4	1	1	1	1	1	1	1	1	1	1	1	2	1	1	1	1	1	1	1	1	1	1	1	1	1	1	1	1	1	1	1
K02988	Translation	RP-S5, MRPS5, rpsE; small subunit ribosomal protein S5	1	1	1	1	1	1	1	1	1	1	1	1	1	1	1	1	1	1	1	1	1	1	1	1	1	1	1	1	1	1	1
K02990	Translation	RP-S6, MRPS6, rpsF; small subunit ribosomal protein S6	1	1	1	1	1	1	1	1	1	1	1	1	1	1	1	1	1	1	0	1	1	1	1	1	1	1	1	1	1	1	1
K02992	Translation	RP-S7, MRPS7, rpsG; small subunit ribosomal protein S7	1	1	1	1	1	1	1	1	1	1	1	1	1	1	1	1	1	1	0	1	1	1	1	1	1	1	0	1	1	2	1
K02994	Translation	RP-S8, rpsH; small subunit ribosomal protein S8	1	1	1	1	1	1	1	1	1	1	1	1	1	1	1	1	1	1	1	1	1	1	1	1	1	1	1	1	1	1	1
K02996	Translation	RP-S9, MRPS9, rpsI; small subunit ribosomal protein S9	1	1	1	1	1	1	1	1	1	1	1	1	1	1	1	1	1	1	1	1	1	1	1	1	1	1	1	1	1	1	1
K03040	Transcription	rpoA; DNA-directed RNA polymerase subunit alpha [EC:2.7.7.6]	1	1	1	1	1	1	1	1	1	1	2	1	1	1	1	1	1	1	1	1	1	1	1	1	1	1	1	1	1	1	1
K03043	Transcription	rpoB; DNA-directed RNA polymerase subunit beta [EC:2.7.7.6]	1	1	3	1	1	1	1	1	1	1	2	0	1	1	0	1	1	1	1	1	1	1	1	1	1	1	1	1	1	2	1
K03046	Transcription	rpoC; DNA-directed RNA polymerase subunit beta' [EC:2.7.7.6]	1	1	1	2	1	1	1	1	1	1	2	0	1	1	0	1	2	1	2	1	1	1	1	2	1	1	1	1	1	2	1
K03060	Transcription	rpoZ; DNA-directed RNA polymerase subunit omega [EC:2.7.7.6]	0	0	0	0	0	0	0	0	0	0	0	0	0	0	0	0	0	0	0	0	0	0	0	1	0	0	0	0	0	0	0
K03070	Folding, sorting and degradation	secA; preprotein translocase subunit SecA [EC:7.4.2.8]	2	2	2	3	2	2	2	3	2	2	3	1	2	2	2	2	2	3	2	2	2	2	2	2	2	2	0	2	3	2	2
K03070	Folding, sorting and degradation	secA; preprotein translocase subunit SecA [EC:7.4.2.8]	2	2	2	3	2	2	2	3	2	2	3	1	2	2	2	2	2	3	2	2	2	2	2	2	2	2	0	2	3	2	2
K03072	Folding, sorting and degradation	secD; preprotein translocase subunit SecD	2	2	3	3	2	2	2	1	2	2	2	0	2	2	2	2	2	2	0	2	2	2	2	2	2	2	2	2	2	2	2
K03073	Folding, sorting and degradation	secE; preprotein translocase subunit SecE	0	0	0	0	0	0	0	0	0	0	0	1	0	0	0	0	0	0	1	0	0	0	0	0	0	0	0	0	0	0	0
K03074	Folding, sorting and degradation	secF; preprotein translocase subunit SecF	1	1	2	1	1	1	1	0	1	1	1	0	1	1	1	1	1	1	0	1	1	1	1	1	1	1	1	1	1	1	1
K03076	Folding, sorting and degradation	secY; preprotein translocase subunit SecY	1	1	1	1	1	1	1	1	1	1	1	1	1	1	1	1	1	1	1	1	1	1	1	1	1	1	1	1	1	1	1
K03077	Carbohydrate metabolism	araD, ulaF, sgaE, sgbE; L-ribulose-5-phosphate 4-epimerase [EC:5.1.3.4]	1	1	1	1	2	1	2	1	1	1	2	0	1	1	0	0	1	0	0	1	1	1	1	1	2	2	1	1	1	1	1
K03079	Carbohydrate metabolism	ulaE, sgaU, sgbU; L-ribulose-5-phosphate 3-epimerase [EC:5.1.3.22]	2	2	5	3	3	2	3	3	4	3	3	3	2	2	0	2	1	1	3	3	3	3	3	3	3	4	3	3	4	3	3
K03086	Cell motility	rpoD; RNA polymerase primary sigma factor	1	1	2	1	1	1	1	1	1	1	1	1	1	1	1	1	1	1	1	1	1	1	2	1	1	1	1	1	1	2	1
K03087	Cellular community - prokaryotes	rpoS; RNA polymerase nonessential primary-like sigma factor	1	1	2	1	1	1	1	1	1	1	1	1	1	1	1	1	1	1	1	1	1	1	1	1	1	1	1	1	1	1	1
K03088	Protein families: genetic information processing	rpoE; RNA polymerase sigma-70 factor, ECF subfamily	3	3	4	3	3	3	3	3	3	3	4	3	2	3	3	3	4	3	1	3	3	3	3	4	3	3	2	3	3	3	3
K03091	Protein families: genetic information processing	sigH; RNA polymerase sporulation-specific sigma factor	0	0	0	0	0	0	0	0	0	0	1	0	0	0	0	0	0	0	0	0	0	0	0	0	0	0	0	0	0	0	0
K03092	Signal transduction	rpoN; RNA polymerase sigma-54 factor	1	1	2	1	1	1	1	1	1	1	1	1	1	1	1	0	1	0	1	1	1	1	0	0	1	0	0	0	0	0	0
K03100	Folding, sorting and degradation	lepB; signal peptidase I [EC:3.4.21.89]	1	1	1	1	1	1	1	1	1	1	1	1	1	1	1	1	1	1	1	1	1	1	2	2	2	2	2	2	2	3	2
K03101	Folding, sorting and degradation	lspA; signal peptidase II [EC:3.4.23.36]	1	1	1	1	1	1	1	1	1	1	1	1	1	1	1	1	1	1	1	1	1	1	1	1	0	1	1	1	1	1	1
K03106	Folding, sorting and degradation	SRP54, ffh; signal recognition particle subunit SRP54 [EC:3.6.5.4]	1	1	1	1	1	1	1	1	1	1	1	1	1	1	1	1	2	1	1	1	1	1	1	1	1	1	1	1	1	1	1
K03110	Folding, sorting and degradation	ftsY; fused signal recognition particle receptor	1	1	1	3	1	1	1	1	1	1	1	1	2	1	1	1	1	1	1	1	1	1	1	1	2	1	1	2	2	2	2
K03111	Replication and repair	ssb; single-strand DNA-binding protein	2	2	2	2	2	2	2	2	2	2	2	2	2	2	2	2	3	2	0	2	2	2	3	1	3	2	1	2	2	2	1
K03146	Metabolism of cofactors and vitamins	THI4, THI1; cysteine-dependent adenosine diphosphate thiazole synthase [EC:2.4.2.60]	1	1	1	1	1	0	1	0	1	1	0	0	0	1	0	0	0	0	0	1	0	0	0	0	0	0	0	0	0	0	0
K03147	Metabolism of cofactors and vitamins	thiC; phosphomethylpyrimidine synthase [EC:4.1.99.17]	2	3	3	3	1	2	2	1	3	2	1	0	2	2	1	2	2	1	1	2	1	1	1	1	1	1	0	1	1	1	1
K03147	Metabolism of cofactors and vitamins	thiC; phosphomethylpyrimidine synthase [EC:4.1.99.17]	2	3	3	3	1	2	2	1	3	2	1	0	2	2	1	2	2	1	1	2	1	1	1	1	1	1	0	1	1	1	1
K03150	Metabolism of cofactors and vitamins	thiH; 2-iminoacetate synthase [EC:4.1.99.19]	2	2	2	3	2	2	2	2	1	2	2	2	3	2	1	4	2	2	1	2	2	2	2	3	1	2	1	2	1	3	2
K03152	Protein families: metabolism	thiJ; protein deglycase [EC:3.5.1.124]	1	1	2	1	1	1	1	2	0	0	1	0	1	0	0	0	0	0	0	0	1	1	0	0	0	0	0	0	0	0	0
K03168	Protein families: genetic information processing	topA; DNA topoisomerase I [EC:5.6.2.1]	1	1	1	1	1	0	1	1	0	0	0	1	1	0	0	0	0	0	0	0	1	1	0	0	0	0	0	0	0	0	0
K03168	Protein families: genetic information processing	topA; DNA topoisomerase I [EC:5.6.2.1]	1	1	1	1	1	0	1	1	0	0	0	1	1	0	0	0	0	0	0	0	1	1	0	0	0	0	0	0	0	0	0
K03169	Protein families: genetic information processing	topB; DNA topoisomerase III [EC:5.6.2.1]	1	1	1	1	1	1	1	1	1	1	2	1	1	1	1	1	1	1	1	1	1	1	1	1	1	1	1	1	1	1	1
K03170	Protein families: genetic information processing	topG, rgy; reverse gyrase [EC:5.6.2.2 5.6.2.-]	0	0	0	0	0	0	0	0	0	0	1	0	0	0	0	0	0	0	0	0	1	1	0	0	0	0	0	0	0	0	0
K03177	Protein families: genetic information processing	truB, PUS4, TRUB1; tRNA pseudouridine55 synthase [EC:5.4.99.25]	1	1	1	1	1	1	1	1	1	1	1	2	1	1	1	1	1	1	0	1	1	1	1	1	1	1	2	1	1	1	1
K03182	Metabolism of cofactors and vitamins	ubiD; 4-hydroxy-3-polyprenylbenzoate decarboxylase [EC:4.1.1.98]	0	0	0	0	0	0	0	0	1	1	0	0	0	1	0	0	0	0	0	1	0	0	0	0	0	0	0	0	0	0	0
K03183	Metabolism of cofactors and vitamins	ubiE; demethylmenaquinone methyltransferase / 2-methoxy-6-polyprenyl-1,4-benzoquinol methylase [EC:2.1.1.163 2.1.1.201]	1	1	1	1	1	0	0	0	1	1	1	1	1	1	1	1	1	1	1	1	0	0	0	0	0	0	0	0	0	0	0
K03183	Metabolism of cofactors and vitamins	ubiE; demethylmenaquinone methyltransferase / 2-methoxy-6-polyprenyl-1,4-benzoquinol methylase [EC:2.1.1.163 2.1.1.201]	1	1	1	1	1	0	0	0	1	1	1	1	1	1	1	1	1	1	1	1	0	0	0	0	0	0	0	0	0	0	0
K03186	Metabolism of cofactors and vitamins	ubiX, bsdB, PAD1; flavin prenyltransferase [EC:2.5.1.129]	1	1	1	1	1	1	1	1	1	1	1	1	1	1	1	1	1	1	1	1	1	1	1	1	1	1	0	1	1	1	1
K03187	Unclassified: genetic information processing	ureE; urease accessory protein	0	0	0	0	0	0	0	0	0	0	0	0	0	0	0	0	0	0	0	0	0	0	0	1	0	1	0	0	0	0	0
K03210	Folding, sorting and degradation	yajC; preprotein translocase subunit YajC	1	1	1	1	1	1	1	1	1	1	1	0	1	1	1	1	1	1	0	1	1	1	1	1	1	1	0	1	1	1	1
K03215	Protein families: genetic information processing	rumA; 23S rRNA (uracil1939-C5)-methyltransferase [EC:2.1.1.190]	1	1	1	1	1	1	1	1	1	1	1	0	1	1	2	1	1	1	0	1	1	1	1	2	1	1	0	1	0	1	1
K03217	Folding, sorting and degradation	yidC, spoIIIJ, OXA1, ccfA; YidC/Oxa1 family membrane protein insertase	2	2	7	4	1	1	1	2	1	1	2	0	2	1	1	1	1	1	2	1	2	2	1	2	1	2	1	1	2	1	1
K03217	Folding, sorting and degradation	yidC, spoIIIJ, OXA1, ccfA; YidC/Oxa1 family membrane protein insertase	2	2	7	4	1	1	1	2	1	1	2	0	2	1	1	1	1	1	2	1	2	2	1	2	1	2	1	1	2	1	1
K03218	Protein families: genetic information processing	rlmB; 23S rRNA (guanosine2251-2'-O)-methyltransferase [EC:2.1.1.185]	1	1	1	1	1	1	1	1	1	1	1	0	1	1	1	1	1	3	0	1	1	1	1	1	1	1	0	1	1	1	1
K03223	Membrane transport	yscL, sctL; type III secretion protein L	1	1	1	1	1	1	1	1	1	1	1	1	1	1	1	0	1	0	1	1	1	1	0	0	0	0	0	0	0	0	0
K03224	Membrane transport	yscN, sctN, hrcN, ssaN; ATP synthase in type III secretion protein N [EC:7.4.2.8]	1	1	1	1	1	1	1	2	1	1	1	1	1	1	1	0	1	0	1	1	1	1	0	0	0	0	0	0	0	0	0
K03226	Membrane transport	yscR, sctR, hrcR, ssaR; type III secretion protein R	1	1	1	1	1	1	1	1	1	1	1	2	1	1	1	1	1	1	1	1	1	1	0	0	0	0	0	0	0	0	0
K03227	Membrane transport	yscS, sctS, hrcS, ssaS; type III secretion protein S	0	1	1	0	1	0	1	1	1	1	0	1	1	1	1	1	1	1	1	1	1	1	0	0	0	0	0	0	0	0	0
K03228	Membrane transport	yscT, sctT, hrcT, ssaT; type III secretion protein T	1	1	1	1	1	1	1	1	1	1	1	1	1	1	1	1	1	1	1	1	1	1	0	0	0	0	0	0	0	0	0
K03229	Membrane transport	yscU, sctU, hrcU, ssaU; type III secretion protein U	1	1	1	1	1	1	1	1	1	1	1	1	1	1	1	1	1	1	0	1	1	1	0	0	0	0	0	0	0	0	0
K03265	Translation	ETF1, ERF1; peptide chain release factor subunit 1	1	1	1	1	1	0	1	1	1	1	0	1	1	1	1	1	1	0	0	1	1	1	0	0	0	0	0	0	0	0	0
K03271	Glycan biosynthesis and metabolism	gmhA, lpcA; D-sedoheptulose 7-phosphate isomerase [EC:5.3.1.28]	0	0	0	1	0	0	0	0	0	0	0	0	0	0	0	0	0	0	0	0	0	0	0	0	0	0	0	0	0	0	0
K03281	Unclassified: signaling and cellular processes	TC.CIC; chloride channel protein, CIC family	0	1	1	1	1	0	1	0	0	0	0	0	2	0	0	0	0	0	0	0	0	0	0	0	0	0	0	0	0	0	0
K03282	Protein families: signaling and cellular processes	mscL; large conductance mechanosensitive channel	0	0	0	0	0	0	1	0	1	1	1	1	0	1	2	1	1	1	0	1	1	1	1	1	1	1	0	1	1	1	1
K03284	Protein families: signaling and cellular processes	corA; magnesium transporter	0	0	0	0	0	0	0	0	0	0	0	0	0	0	0	0	0	0	0	0	1	0	1	1	1	1	2	1	1	1	1
K03287	Unclassified: signaling and cellular processes	TC.OMF; outer membrane factor, OMF family	0	0	0	0	0	0	0	1	0	0	0	0	0	0	0	0	0	0	0	0	0	0	0	0	0	0	0	0	0	0	0
K03296	Unclassified: signaling and cellular processes	TC.HAE1; hydrophobic/amphiphilic exporter-1 (mainly G- bacteria), HAE1 family	0	0	0	0	0	0	0	0	1	1	0	0	0	1	0	1	1	1	0	1	0	0	0	0	0	0	0	0	0	0	0
K03307	Unclassified: signaling and cellular processes	TC.SSS; solute:Na+ symporter, SSS family	3	3	3	3	3	3	3	3	1	1	3	0	3	1	0	1	2	0	1	1	4	4	3	2	3	3	0	3	2	3	2
K03316	Unclassified: signaling and cellular processes	TC.CPA1; monovalent cation:H+ antiporter, CPA1 family	0	1	1	1	0	0	0	0	2	2	1	0	1	2	2	2	3	2	1	2	1	1	2	2	2	1	1	2	2	4	2
K03320	Protein families: signaling and cellular processes	amt, AMT, MEP; ammonium transporter, Amt family	0	1	2	1	1	0	2	2	0	0	0	0	1	0	0	0	0	0	1	0	1	1	1	2	0	1	0	1	0	1	1
K03322	Protein families: signaling and cellular processes	mntH; manganese transport protein	1	0	0	1	0	0	0	0	0	0	0	0	0	0	0	0	0	0	0	0	0	0	0	0	0	0	0	0	0	0	0
K03325	Protein families: signaling and cellular processes	ACR3, arsB; arsenite transporter	0	0	0	0	0	0	0	0	0	0	0	0	0	0	0	0	0	0	0	0	2	3	1	1	1	1	0	1	1	0	1
K03325	Protein families: signaling and cellular processes	ACR3, arsB; arsenite transporter	0	0	0	0	0	0	0	0	0	0	0	0	0	0	0	0	0	0	0	0	2	3	1	1	1	1	0	1	1	0	1
K03327	Protein families: signaling and cellular processes	TC.MATE, SLC47A, norM, mdtK, dinF; multidrug resistance protein, MATE family	0	0	0	0	0	0	0	0	0	0	0	0	0	0	0	0	0	0	0	0	0	0	0	1	0	0	0	0	0	0	0
K03328	Unclassified: signaling and cellular processes	TC.PST; polysaccharide transporter, PST family	0	0	0	1	0	0	0	0	0	0	0	0	0	0	0	0	0	0	0	0	0	0	0	0	1	0	0	0	0	0	0
K03332	Carbohydrate metabolism	fruA; fructan beta-fructosidase [EC:3.2.1.80]	0	0	0	0	0	0	1	0	1	1	0	1	0	1	1	1	1	1	1	1	1	1	1	1	1	1	0	1	1	1	1
K03335	Carbohydrate metabolism	iolE; inosose dehydratase [EC:4.2.1.44]	1	1	1	1	1	1	1	1	1	2	1	1	1	1	0	1	1	2	0	1	1	2	2	1	1	2	0	2	2	2	2
K03337	Carbohydrate metabolism	iolB; 5-deoxy-glucuronate isomerase [EC:5.3.1.30]	0	0	0	0	0	0	0	0	1	1	0	0	0	1	0	1	1	1	0	1	0	0	0	0	0	0	0	0	0	0	0
K03338	Carbohydrate metabolism	iolC; 5-dehydro-2-deoxygluconokinase [EC:2.7.1.92]	0	0	0	1	0	0	0	0	0	0	0	0	0	0	0	0	0	0	0	0	0	0	0	0	0	0	0	0	0	0	0
K03342	Metabolism of cofactors and vitamins	pabBC; para-aminobenzoate synthetase / 4-amino-4-deoxychorismate lyase [EC:2.6.1.85 4.1.3.38]	0	0	0	0	0	0	1	0	0	0	1	0	0	0	0	0	0	0	0	0	0	0	1	0	1	1	0	1	1	1	1
K03386	Cell growth and death	PRDX2_4, ahpC; peroxiredoxin 2/4 [EC:1.11.1.24]	1	2	2	1	1	1	1	1	1	1	2	0	1	1	0	1	1	1	1	1	1	1	1	1	1	1	1	1	1	1	1
K03388	Energy metabolism	hdrA2; heterodisulfide reductase subunit A2 [EC:1.8.7.3 1.8.98.4 1.8.98.5 1.8.98.6]	2	2	3	2	1	2	1	2	2	1	2	3	2	1	0	6	1	1	1	1	2	2	3	3	4	1	3	1	1	3	2
K03388	Energy metabolism	hdrA2; heterodisulfide reductase subunit A2 [EC:1.8.7.3 1.8.98.4 1.8.98.5 1.8.98.6]	2	2	3	2	1	2	1	2	2	1	2	3	2	1	0	6	1	1	1	1	2	2	3	3	4	1	3	1	1	3	2
K03390	Energy metabolism	hdrC2; heterodisulfide reductase subunit C2 [EC:1.8.7.3 1.8.98.4 1.8.98.5 1.8.98.6]	1	1	1	0	1	1	1	1	1	1	1	1	1	1	0	2	1	1	1	1	1	1	1	1	1	1	0	1	1	0	1
K03394	Metabolism of cofactors and vitamins	cobI-cbiL; precorrin-2/cobalt-factor-2 C20-methyltransferase [EC:2.1.1.130 2.1.1.151]	1	1	1	0	2	1	1	0	0	0	1	1	1	0	0	0	0	0	0	0	2	2	2	2	3	2	0	2	3	2	3
K03394	Metabolism of cofactors and vitamins	cobI-cbiL; precorrin-2/cobalt-factor-2 C20-methyltransferase [EC:2.1.1.130 2.1.1.151]	1	1	1	0	2	1	1	0	0	0	1	1	1	0	0	0	0	0	0	0	2	2	2	2	3	2	0	2	3	2	3
K03399	Metabolism of cofactors and vitamins	cbiE; cobalt-precorrin-7 (C5)-methyltransferase [EC:2.1.1.289]	1	1	0	0	1	1	1	0	0	0	0	0	1	0	0	0	0	0	0	0	1	1	1	1	1	1	0	1	2	1	1
K03406	Signal transduction	mcp; methyl-accepting chemotaxis protein	10	7	9	12	10	7	9	8	6	9	7	8	6	7	1	9	10	7	4	8	4	5	2	3	3	3	2	3	2	3	3
K03406	Signal transduction	mcp; methyl-accepting chemotaxis protein	10	7	9	12	10	7	9	8	6	9	7	8	6	7	1	9	10	7	4	8	4	5	2	3	3	3	2	3	2	3	3
K03407	Signal transduction	cheA; two-component system, chemotaxis family, sensor kinase CheA [EC:2.7.13.3]	3	1	4	1	1	1	2	2	1	1	3	1	2	1	1	0	1	0	1	1	1	1	0	1	0	0	0	0	0	0	0
K03407	Signal transduction	cheA; two-component system, chemotaxis family, sensor kinase CheA [EC:2.7.13.3]	3	1	4	1	1	1	2	2	1	1	3	1	2	1	1	0	1	0	1	1	1	1	0	1	0	0	0	0	0	0	0
K03408	Signal transduction	cheW; purine-binding chemotaxis protein CheW	2	1	2	1	1	1	1	1	1	1	2	1	2	1	2	1	1	1	0	1	2	1	0	0	0	0	0	0	0	0	0
K03409	Cell motility	cheX; chemotaxis protein CheX	0	0	0	0	0	0	0	0	0	0	1	0	1	0	0	0	0	0	0	0	0	0	0	0	0	0	0	0	0	0	0
K03410	Cell motility	cheC; chemotaxis protein CheC	1	1	1	1	1	1	1	1	1	1	1	1	1	1	0	1	1	1	1	1	1	1	0	0	0	0	0	0	0	0	0
K03411	Cell motility	cheD; chemotaxis protein CheD [EC:3.5.1.44]	1	1	1	1	1	1	1	1	1	1	1	1	1	1	0	1	1	1	1	1	1	1	0	0	0	0	0	0	0	0	0
K03412	Signal transduction	cheB; two-component system, chemotaxis family, protein-glutamate methylesterase/glutaminase [EC:3.1.1.61 3.5.1.44]	2	1	2	1	1	2	1	1	1	1	2	0	2	1	0	1	1	1	1	1	1	1	0	0	0	0	0	0	0	0	0
K03413	Signal transduction	cheY; two-component system, chemotaxis family, chemotaxis protein CheY	1	1	1	2	2	2	2	2	1	1	3	1	2	1	1	0	1	0	2	1	1	1	0	0	0	0	0	0	0	0	0
K03413	Signal transduction	cheY; two-component system, chemotaxis family, chemotaxis protein CheY	1	1	1	2	2	2	2	2	1	1	3	1	2	1	1	0	1	0	2	1	1	1	0	0	0	0	0	0	0	0	0
K03415	Signal transduction	cheV; two-component system, chemotaxis family, chemotaxis protein CheV	0	0	1	0	0	0	0	0	0	0	0	0	0	0	0	0	0	0	0	0	0	0	0	0	0	0	0	0	0	0	0
K03418	Carbohydrate metabolism	dmfA2; N,N-dimethylformamidase large subunit [EC:3.5.1.56]	0	0	0	0	0	0	0	0	0	0	1	0	0	0	0	0	0	0	0	0	0	0	0	0	0	0	0	0	0	0	0
K03424	Unclassified: metabolism	tatD; TatD DNase family protein [EC:3.1.21.-]	1	1	1	1	1	1	1	1	1	1	1	1	1	1	1	1	1	2	1	1	1	1	1	0	2	1	0	1	2	1	1
K03426	Metabolism of cofactors and vitamins	E3.6.1.22, NUDT12, nudC; NAD+ diphosphatase [EC:3.6.1.22]	0	0	0	0	0	0	0	0	0	0	0	0	0	0	0	0	0	0	0	0	0	0	1	2	1	1	0	1	0	1	0
K03427	Protein families: signaling and cellular processes	hsdM; type I restriction enzyme M protein [EC:2.1.1.72]	0	0	0	0	0	0	0	1	6	4	1	0	0	3	2	5	4	10	1	3	0	1	1	7	9	3	1	6	1	2	2
K03427	Protein families: signaling and cellular processes	hsdM; type I restriction enzyme M protein [EC:2.1.1.72]	0	0	0	0	0	0	0	1	6	4	1	0	0	3	2	5	4	10	1	3	0	1	1	7	9	3	1	6	1	2	2
K03429	Lipid metabolism	ugtP; processive 1,2-diacylglycerol beta-glucosyltransferase [EC:2.4.1.315]	0	0	0	0	0	0	1	0	0	0	1	0	0	0	0	0	0	0	0	0	0	0	0	0	0	2	0	0	0	0	0
K03430	Metabolism of other amino acids	phnW; 2-aminoethylphosphonate-pyruvate transaminase [EC:2.6.1.37]	0	0	0	0	0	0	0	1	0	0	0	0	0	0	0	0	0	0	0	0	0	0	0	0	0	0	0	0	0	0	0
K03431	Carbohydrate metabolism	glmM; phosphoglucosamine mutase [EC:5.4.2.10]	0	0	0	0	1	0	0	0	0	0	0	0	0	0	0	0	0	0	0	0	0	0	0	0	0	0	0	0	0	0	0
K03435	Protein families: genetic information processing	fruR1, fruR; LacI family transcriptional regulator, fructose operon transcriptional repressor	0	0	0	0	0	0	0	0	0	0	0	0	0	1	0	0	0	0	0	0	0	0	0	0	0	0	0	0	0	0	0
K03436	Protein families: genetic information processing	fruR2, fruR; DeoR family transcriptional regulator, fructose operon transcriptional repressor	0	0	1	0	0	0	1	0	0	1	0	1	0	1	0	0	0	0	0	1	0	1	0	0	0	1	0	0	0	0	0
K03436	Protein families: genetic information processing	fruR2, fruR; DeoR family transcriptional regulator, fructose operon transcriptional repressor	0	0	1	0	0	0	1	0	0	1	0	1	0	1	0	0	0	0	0	1	0	1	0	0	0	1	0	0	0	0	0
K03437	Protein families: genetic information processing	spoU; RNA methyltransferase, TrmH family	1	0	0	1	1	0	0	0	0	0	0	0	0	0	0	0	0	0	0	0	0	0	0	0	0	1	0	0	0	0	0
K03438	Protein families: genetic information processing	mraW, rsmH; 16S rRNA (cytosine1402-N4)-methyltransferase [EC:2.1.1.199]	1	1	2	1	1	1	1	2	1	1	1	1	1	1	1	1	1	1	0	1	1	1	2	2	3	2	1	2	1	4	1
K03449	Protein families: signaling and cellular processes	MFS.CP; MFS transporter, CP family, cyanate transporter	0	0	0	0	0	0	0	0	0	0	0	0	0	0	0	0	0	0	0	0	0	0	0	1	1	1	0	0	1	1	0
K03453	Unclassified: signaling and cellular processes	TC.BASS; bile acid:Na+ symporter, BASS family	0	0	0	0	0	0	1	0	0	0	0	0	0	0	0	0	0	0	0	0	0	0	0	0	0	0	0	0	0	0	0
K03455	Unclassified: signaling and cellular processes	TC.KEF; monovalent cation:H+ antiporter-2, CPA2 family	0	0	0	0	0	0	0	0	0	0	0	0	1	0	0	0	0	0	0	0	0	0	0	0	0	0	0	0	0	0	0
K03457	Unclassified: signaling and cellular processes	TC.NCS1; nucleobase:cation symporter-1, NCS1 family	1	1	1	1	1	1	1	1	1	1	1	0	1	1	0	2	0	1	1	1	1	2	1	1	1	1	1	1	0	1	1
K03459	Protein families: signaling and cellular processes	focB; formate transporter	0	1	1	1	0	0	1	1	1	1	0	0	1	1	0	1	1	1	0	1	1	1	1	1	1	1	1	1	1	1	1
K03465	Nucleotide metabolism	thyX, thy1; thymidylate synthase (FAD) [EC:2.1.1.148]	1	1	1	1	2	1	1	1	1	1	1	0	1	1	2	1	1	1	1	1	1	1	1	1	1	1	1	1	1	1	1
K03466	Protein families: genetic information processing	ftsK, spoIIIE; DNA segregation ATPase FtsK/SpoIIIE, S-DNA-T family	2	3	3	3	4	3	3	3	2	2	1	1	2	2	2	1	2	1	1	3	3	2	4	4	4	4	3	4	5	4	4
K03466	Protein families: genetic information processing	ftsK, spoIIIE; DNA segregation ATPase FtsK/SpoIIIE, S-DNA-T family	2	3	3	3	4	3	3	3	2	2	1	1	2	2	2	1	2	1	1	3	3	2	4	4	4	4	3	4	5	4	4
K03469	Replication and repair	rnhA, RNASEH1; ribonuclease HI [EC:3.1.26.4]	1	1	1	1	1	2	1	1	2	2	1	2	1	2	1	3	2	2	1	2	1	1	0	0	1	1	0	1	0	0	1
K03469	Replication and repair	rnhA, RNASEH1; ribonuclease HI [EC:3.1.26.4]	1	1	1	1	1	2	1	1	2	2	1	2	1	2	1	3	2	2	1	2	1	1	0	0	1	1	0	1	0	0	1
K03470	Replication and repair	rnhB; ribonuclease HII [EC:3.1.26.4]	2	2	3	2	2	2	2	2	2	2	2	2	2	2	2	2	2	2	3	2	2	2	2	2	2	2	2	2	2	2	2
K03474	Metabolism of cofactors and vitamins	pdxJ; pyridoxine 5-phosphate synthase [EC:2.6.99.2]	1	1	1	1	1	1	1	0	1	1	1	0	1	1	1	1	1	1	1	1	1	1	1	1	1	1	1	1	1	1	1
K03478	Unclassified: metabolism	chbG; chitin disaccharide deacetylase [EC:3.5.1.105]	0	0	0	0	0	0	0	0	0	0	0	0	0	0	1	0	0	0	0	0	0	0	0	0	0	0	0	0	0	0	0
K03483	Protein families: genetic information processing	mtlR; mannitol operon transcriptional activator	1	1	1	1	1	1	0	0	0	0	0	1	1	0	0	0	0	0	0	0	1	1	1	1	1	1	2	1	1	1	1
K03484	Protein families: genetic information processing	scrR; LacI family transcriptional regulator, sucrose operon repressor	1	1	1	1	1	0	0	0	0	0	0	0	3	0	0	0	0	0	0	0	0	0	0	0	0	0	0	0	0	0	0
K03495	Protein families: genetic information processing	gidA, mnmG, MTO1; tRNA uridine 5-carboxymethylaminomethyl modification enzyme	1	1	1	2	1	1	1	2	1	1	1	1	1	1	1	1	2	1	1	1	1	1	1	1	1	1	1	1	1	1	1
K03496	Protein families: genetic information processing	parA, soj; chromosome partitioning protein	3	2	4	2	2	2	2	1	2	2	3	1	3	2	2	2	2	2	1	2	2	2	2	2	2	2	1	1	2	2	2
K03497	Protein families: genetic information processing	parB, spo0J; ParB family transcriptional regulator, chromosome partitioning protein	1	1	1	1	1	1	1	0	1	1	1	1	1	1	1	1	1	1	0	1	1	1	1	1	1	1	1	0	1	1	1
K03498	Protein families: signaling and cellular processes	trkH, trkG, ktrB, ktrD; trk/ktr system potassium uptake protein	1	1	1	1	1	1	1	1	1	1	1	1	1	1	1	1	1	1	2	1	1	1	2	1	2	1	0	1	1	1	1
K03499	Protein families: signaling and cellular processes	trkA, ktrA, ktrC; trk/ktr system potassium uptake protein	1	2	2	2	1	1	2	1	1	1	1	1	2	1	2	1	2	1	3	1	1	1	1	1	1	1	1	1	1	1	1
K03499	Protein families: signaling and cellular processes	trkA, ktrA, ktrC; trk/ktr system potassium uptake protein	1	2	2	2	1	1	2	1	1	1	1	1	2	1	2	1	2	1	3	1	1	1	1	1	1	1	1	1	1	1	1
K03500	Protein families: genetic information processing	rsmB, sun; 16S rRNA (cytosine967-C5)-methyltransferase [EC:2.1.1.176]	2	2	3	3	1	1	1	2	1	1	1	0	2	1	2	1	1	1	1	1	2	1	1	1	1	1	1	1	1	1	1
K03500	Protein families: genetic information processing	rsmB, sun; 16S rRNA (cytosine967-C5)-methyltransferase [EC:2.1.1.176]	2	2	3	3	1	1	1	2	1	1	1	0	2	1	2	1	1	1	1	1	2	1	1	1	1	1	1	1	1	1	1
K03501	Protein families: genetic information processing	gidB, rsmG; 16S rRNA (guanine527-N7)-methyltransferase [EC:2.1.1.170]	1	1	2	1	1	1	1	1	1	1	1	0	1	0	1	1	1	1	0	1	1	1	1	1	1	1	0	0	1	1	1
K03502	Protein families: genetic information processing	umuC; DNA polymerase V	0	0	0	0	0	0	0	0	0	0	0	0	0	0	0	0	0	0	0	0	0	0	1	2	2	1	1	1	0	2	1
K03503	Protein families: metabolism	umuD; DNA polymerase V [EC:3.4.21.-]	0	0	0	0	0	0	0	0	0	0	0	0	0	0	0	0	0	0	0	0	0	0	1	1	1	1	1	1	0	1	1
K03517	Metabolism of cofactors and vitamins	nadA; quinolinate synthase [EC:2.5.1.72]	1	1	1	2	1	1	1	1	1	1	1	0	1	1	1	2	1	1	1	1	1	1	1	1	1	1	1	1	1	1	1
K03521	Unclassified: metabolism	fixA, etfB; electron transfer flavoprotein beta subunit	0	0	0	0	0	0	0	0	0	0	0	0	0	0	0	0	0	0	0	0	1	1	1	1	1	2	1	1	2	1	1
K03522	Protein families: signaling and cellular processes	fixB, etfA; electron transfer flavoprotein alpha subunit	0	0	0	0	0	0	0	0	0	0	0	0	0	0	0	0	0	0	0	0	1	1	1	1	2	2	1	1	2	1	1
K03523	Membrane transport	bioY; biotin transport system substrate-specific component	1	1	1	1	1	1	1	1	1	0	1	0	0	0	1	0	0	0	0	1	1	1	1	0	1	1	0	1	1	1	1
K03524	Metabolism of cofactors and vitamins	birA; BirA family transcriptional regulator, biotin operon repressor / biotin---[acetyl-CoA-carboxylase] ligase [EC:6.3.4.15]	1	1	0	1	1	1	1	1	1	1	1	1	1	2	1	1	1	1	1	1	1	1	1	0	1	1	0	1	1	1	1
K03525	Metabolism of cofactors and vitamins	coaX; type III pantothenate kinase [EC:2.7.1.33]	1	1	1	1	1	1	0	1	1	1	1	1	1	1	1	1	1	1	1	1	1	1	1	1	1	1	1	1	1	1	1
K03526	Metabolism of terpenoids and polyketides	gcpE, ispG; (E)-4-hydroxy-3-methylbut-2-enyl-diphosphate synthase [EC:1.17.7.1 1.17.7.3]	1	1	1	1	1	1	1	1	1	1	1	1	1	1	1	1	1	1	0	1	1	1	1	1	1	1	2	1	1	1	1
K03527	Metabolism of terpenoids and polyketides	ispH, lytB; 4-hydroxy-3-methylbut-2-en-1-yl diphosphate reductase [EC:1.17.7.4]	3	3	3	3	2	2	2	3	3	3	3	4	3	3	5	3	3	3	0	3	2	2	2	3	2	2	3	2	2	3	2
K03529	Protein families: genetic information processing	smc; chromosome segregation protein	1	1	2	2	1	1	1	1	1	1	2	2	1	1	1	1	1	1	2	1	1	1	1	1	2	1	1	1	1	1	1
K03530	Protein families: genetic information processing	hupB; DNA-binding protein HU-beta	1	1	1	1	1	1	1	1	1	1	1	1	1	1	2	1	2	1	1	1	1	1	1	1	1	1	1	1	1	2	1
K03531	Cell growth and death	ftsZ; cell division protein FtsZ	2	2	2	2	2	2	2	2	2	2	2	1	2	2	2	2	2	2	2	2	2	2	2	2	2	2	2	2	2	2	2
K03534	Unclassified: metabolism	rhaM; L-rhamnose mutarotase [EC:5.1.3.32]	1	0	1	1	1	1	1	1	0	0	1	0	1	0	0	0	0	0	0	0	1	1	0	0	0	0	0	0	0	0	0
K03536	Protein families: genetic information processing	rnpA; ribonuclease P protein component [EC:3.1.26.5]	1	1	3	0	0	0	0	0	0	0	0	0	1	0	0	0	0	0	0	0	1	0	1	0	1	1	1	1	1	1	1
K03544	Cell growth and death	clpX, CLPX; ATP-dependent Clp protease ATP-binding subunit ClpX	1	1	1	1	1	1	1	1	1	1	2	1	2	1	1	1	1	1	1	1	1	1	1	1	1	1	1	1	1	2	1
K03545	Unclassified: genetic information processing	tig; trigger factor	1	1	1	1	1	1	1	1	1	1	1	1	1	1	1	1	1	1	0	1	1	1	1	1	1	1	1	1	1	1	1
K03546	Protein families: genetic information processing	sbcC, rad50; DNA repair protein SbcC/Rad50	1	1	1	1	1	1	1	1	3	2	2	2	1	2	1	2	3	1	2	2	1	1	1	4	3	1	1	2	0	1	2
K03546	Protein families: genetic information processing	sbcC, rad50; DNA repair protein SbcC/Rad50	1	1	1	1	1	1	1	1	3	2	2	2	1	2	1	2	3	1	2	2	1	1	1	4	3	1	1	2	0	1	2
K03547	Protein families: genetic information processing	sbcD, mre11; DNA repair protein SbcD/Mre11	1	1	1	1	1	1	1	1	2	2	1	1	1	2	1	2	2	1	1	2	1	1	1	2	3	2	0	2	1	2	3
K03548	Protein families: signaling and cellular processes	perM; putative permease	1	1	1	1	1	1	1	1	1	1	1	1	0	1	1	1	1	1	1	1	1	1	1	1	1	1	1	1	1	1	1
K03549	Protein families: signaling and cellular processes	kup; KUP system potassium uptake protein	0	0	0	0	0	0	2	0	0	0	0	0	0	0	0	0	0	0	0	0	0	0	1	1	1	0	1	2	1	1	1
K03550	Replication and repair	ruvA; holliday junction DNA helicase RuvA [EC:5.6.2.4]	1	1	2	1	1	1	1	1	0	1	1	1	1	1	1	1	1	1	1	1	1	1	1	1	1	1	1	1	1	1	1
K03551	Replication and repair	ruvB; holliday junction DNA helicase RuvB [EC:5.6.2.4]	1	1	2	1	1	1	1	1	1	1	1	1	1	1	1	1	1	1	1	1	1	1	1	1	1	1	1	1	1	1	1
K03553	Replication and repair	recA; recombination protein RecA	1	1	1	1	2	1	1	1	1	2	2	1	1	1	1	1	1	1	1	1	1	1	1	1	1	1	1	1	1	1	1
K03555	Replication and repair	mutS; DNA mismatch repair protein MutS	2	2	2	2	0	2	0	2	0	0	0	0	0	0	0	0	0	0	0	0	0	0	1	2	1	2	0	1	1	1	1
K03558	Poorly characterized	cvpA; membrane protein required for colicin V production	0	1	1	0	0	0	0	0	0	0	0	0	0	0	0	0	0	0	0	0	0	0	0	0	0	0	0	0	0	0	0
K03559	Protein families: signaling and cellular processes	exbD; biopolymer transport protein ExbD	2	2	2	1	1	0	2	1	0	1	1	0	2	1	1	1	1	1	0	1	1	1	1	1	1	1	0	1	1	1	1
K03561	Protein families: signaling and cellular processes	exbB; biopolymer transport protein ExbB	2	2	1	1	1	0	2	1	0	2	1	0	2	2	0	0	2	2	0	0	1	1	1	1	1	1	0	1	1	1	1
K03562	Protein families: signaling and cellular processes	tolQ; biopolymer transport protein TolQ	2	2	1	1	1	0	2	1	0	2	1	0	2	2	0	0	2	2	0	0	1	1	1	1	1	1	0	1	1	1	1
K03563	Signal transduction	csrA; carbon storage regulator	1	1	1	0	1	1	1	1	1	1	1	1	1	1	0	1	2	1	1	1	1	1	0	0	0	0	0	0	0	0	0
K03564	Unclassified: metabolism	BCP, PRXQ, DOT5; thioredoxin-dependent peroxiredoxin [EC:1.11.1.24]	0	0	0	0	0	0	1	1	0	0	0	1	0	0	0	0	0	0	1	0	0	0	1	1	1	1	0	1	1	1	1
K03565	Protein families: genetic information processing	recX; regulatory protein	1	1	1	1	0	1	1	1	1	1	1	1	1	1	1	1	1	1	1	1	1	1	1	1	1	1	1	1	1	1	1
K03567	Cellular community - prokaryotes	gcvR; glycine cleavage system transcriptional repressor	1	1	1	1	1	1	1	1	1	1	1	1	1	1	1	1	1	1	0	1	1	1	1	1	1	0	0	1	1	1	1
K03568	Protein families: metabolism	tldD; TldD protein	1	1	1	1	1	1	1	1	1	1	1	1	1	1	2	1	3	1	1	1	1	1	0	0	0	0	0	0	0	0	0
K03569	Protein families: genetic information processing	mreB; rod shape-determining protein MreB and related proteins	1	1	1	1	1	1	1	1	1	1	1	1	1	1	1	1	1	1	1	1	1	1	1	1	1	1	1	1	1	1	1
K03570	Protein families: genetic information processing	mreC; rod shape-determining protein MreC	1	1	1	1	1	1	1	1	1	1	1	0	1	1	1	1	1	1	1	1	1	1	1	1	1	1	1	1	1	1	1
K03574	Protein families: genetic information processing	mutT, NUDT15, MTH2; 8-oxo-dGTP diphosphatase [EC:3.6.1.55]	3	4	4	3	3	4	4	3	2	2	2	0	2	2	1	2	2	2	1	2	4	4	2	3	2	2	1	2	3	3	2
K03574	Protein families: genetic information processing	mutT, NUDT15, MTH2; 8-oxo-dGTP diphosphatase [EC:3.6.1.55]	3	4	4	3	3	4	4	3	2	2	2	0	2	2	1	2	2	2	1	2	4	4	2	3	2	2	1	2	3	3	2
K03575	Replication and repair	mutY; A/G-specific adenine glycosylase [EC:3.2.2.31]	1	1	1	1	1	1	1	1	0	0	1	0	1	0	0	0	0	0	0	0	0	0	1	1	1	1	0	1	1	1	1
K03575	Replication and repair	mutY; A/G-specific adenine glycosylase [EC:3.2.2.31]	1	1	1	1	1	1	1	1	0	0	1	0	1	0	0	0	0	0	0	0	0	0	1	1	1	1	0	1	1	1	1
K03577	Protein families: genetic information processing	acrR, smeT; TetR/AcrR family transcriptional regulator, acrAB operon repressor	0	0	0	0	0	0	0	0	0	0	0	0	0	0	0	0	1	0	0	0	0	0	0	0	0	0	0	0	0	0	0
K03578	Unclassified: metabolism	hrpA; ATP-dependent helicase HrpA [EC:3.6.4.13]	0	0	0	0	0	0	0	0	0	0	0	0	0	0	0	0	0	0	0	0	0	0	0	0	0	1	0	0	0	1	0
K03581	Replication and repair	recD; exodeoxyribonuclease V alpha subunit [EC:3.1.11.5]	0	0	0	0	0	0	0	0	0	0	0	0	0	0	0	0	0	0	0	0	0	0	1	1	1	1	1	1	2	1	1
K03581	Replication and repair	recD; exodeoxyribonuclease V alpha subunit [EC:3.1.11.5]	0	0	0	0	0	0	0	0	0	0	0	0	0	0	0	0	0	0	0	0	0	0	1	1	1	1	1	1	2	1	1
K03582	Replication and repair	recB; exodeoxyribonuclease V beta subunit [EC:3.1.11.5]	0	0	0	0	0	0	0	0	0	0	0	0	0	0	0	0	0	0	0	0	0	0	1	1	2	1	1	1	1	2	2
K03584	Replication and repair	recO; DNA repair protein RecO (recombination protein O)	1	1	1	1	1	1	1	1	1	1	1	0	1	1	1	1	1	1	1	1	1	1	1	1	1	1	0	1	1	1	1
K03587	Glycan biosynthesis and metabolism	ftsI; cell division protein FtsI (penicillin-binding protein 3) [EC:3.4.16.4]	1	1	1	1	1	1	1	2	1	2	1	1	1	1	1	1	1	1	0	1	1	1	1	1	1	1	1	1	1	1	1
K03588	Cell growth and death	ftsW, spoVE; cell division protein FtsW	1	1	1	1	1	1	1	1	1	1	1	1	1	1	1	1	1	1	0	1	1	1	1	1	1	1	1	1	1	1	1
K03589	Cell growth and death	ftsQ; cell division protein FtsQ	1	1	1	1	1	1	1	1	1	1	1	0	1	1	1	2	1	1	1	1	1	1	1	1	1	1	1	1	1	1	1
K03589	Cell growth and death	ftsQ; cell division protein FtsQ	1	1	1	1	1	1	1	1	1	1	1	0	1	1	1	2	1	1	1	1	1	1	1	1	1	1	1	1	1	1	1
K03590	Cell growth and death	ftsA; cell division protein FtsA	1	1	1	1	1	1	1	1	1	1	1	0	1	1	1	1	1	1	1	1	1	1	1	1	1	1	1	1	1	1	1
K03592	Protein families: metabolism	pmbA; PmbA protein	1	1	1	1	1	1	1	1	1	1	1	2	1	1	1	1	1	1	1	1	1	1	0	0	0	0	0	0	0	0	0
K03594	Metabolism of cofactors and vitamins	bfr; bacterioferritin [EC:1.16.3.1]	1	1	1	1	1	1	1	1	1	1	0	0	1	1	1	1	1	1	0	1	0	0	0	0	0	0	0	0	0	0	0
K03595	Protein families: genetic information processing	era, ERAL1; GTPase	2	2	2	2	2	2	2	0	2	2	2	0	2	2	2	2	2	2	2	2	2	2	2	2	2	2	2	2	2	2	2
K03595	Protein families: genetic information processing	era, ERAL1; GTPase	2	2	2	2	2	2	2	0	2	2	2	0	2	2	2	2	2	2	2	2	2	2	2	2	2	2	2	2	2	2	2
K03596	Infectious disease: bacterial	lepA; GTP-binding protein LepA	1	1	1	1	1	1	1	1	1	1	1	0	1	1	1	1	1	1	1	2	1	1	1	1	1	1	1	1	1	2	1
K03601	Replication and repair	xseA; exodeoxyribonuclease VII large subunit [EC:3.1.11.6]	1	1	1	1	0	0	1	1	1	1	1	0	1	1	1	1	1	1	0	1	1	1	1	1	1	1	1	1	1	2	1
K03602	Replication and repair	xseB; exodeoxyribonuclease VII small subunit [EC:3.1.11.6]	1	1	1	1	0	0	1	1	1	1	1	0	1	1	1	1	1	1	0	1	1	1	1	1	1	1	1	1	1	1	1
K03604	Protein families: genetic information processing	purR; LacI family transcriptional regulator, purine nucleotide synthesis repressor	2	3	1	3	1	1	3	0	0	1	2	1	1	2	0	1	1	0	1	1	1	1	0	0	0	0	1	0	0	1	1
K03605	Protein families: metabolism	hyaD, hybD; hydrogenase maturation protease [EC:3.4.23.-]	0	0	0	0	0	0	0	0	1	0	1	0	1	0	1	1	1	1	0	0	1	1	1	1	1	0	0	1	1	1	1
K03606	Cellular community - prokaryotes	wcaJ; undecaprenyl-phosphate glucose phosphotransferase [EC:2.7.8.31]	1	0	0	0	0	0	0	0	0	0	0	0	0	0	0	0	0	0	0	0	0	0	0	0	0	0	0	0	0	0	0
K03612	Unclassified: metabolism	rnfG; H+/Na+-translocating ferredoxin:NAD+ oxidoreductase subunit G	1	1	1	1	1	1	1	1	1	1	1	1	1	1	1	1	1	1	0	1	1	1	3	2	2	2	1	2	2	2	2
K03613	Unclassified: metabolism	rnfE; H+/Na+-translocating ferredoxin:NAD+ oxidoreductase subunit E	2	2	2	2	2	2	2	2	2	2	2	2	2	2	1	2	2	2	0	2	2	2	5	3	3	3	2	3	3	3	3
K03614	Unclassified: metabolism	rnfD; H+/Na+-translocating ferredoxin:NAD+ oxidoreductase subunit D [EC:7.1.1.11 7.2.1.2]	1	1	1	1	1	1	2	1	1	1	1	1	1	1	1	1	1	1	1	1	1	1	1	1	1	1	1	1	1	1	1
K03615	Unclassified: metabolism	rnfC; H+/Na+-translocating ferredoxin:NAD+ oxidoreductase subunit C [EC:7.1.1.11 7.2.1.2]	3	3	4	2	3	2	4	3	2	2	2	2	3	2	2	3	2	3	3	2	2	3	3	3	4	3	4	3	3	2	3
K03616	Unclassified: metabolism	rnfB; H+/Na+-translocating ferredoxin:NAD+ oxidoreductase subunit B [EC:7.1.1.11 7.2.1.2]	2	2	2	3	2	2	2	2	3	3	2	1	2	3	0	3	3	3	0	3	2	2	2	2	2	2	2	2	2	2	2
K03616	Unclassified: metabolism	rnfB; H+/Na+-translocating ferredoxin:NAD+ oxidoreductase subunit B [EC:7.1.1.11 7.2.1.2]	2	2	2	3	2	2	2	2	3	3	2	1	2	3	0	3	3	3	0	3	2	2	2	2	2	2	2	2	2	2	2
K03617	Unclassified: metabolism	rnfA; H+/Na+-translocating ferredoxin:NAD+ oxidoreductase subunit A	2	2	2	2	2	2	2	2	2	2	2	2	2	2	1	2	2	3	1	2	2	2	3	2	2	2	1	2	2	2	2
K03621	Lipid metabolism	plsX; phosphate acyltransferase [EC:2.3.1.274]	1	1	1	1	1	1	1	1	1	1	1	1	1	1	1	1	1	1	2	1	1	1	1	1	1	1	1	1	1	1	1
K03624	Protein families: genetic information processing	greA; transcription elongation factor GreA	1	1	1	1	1	1	1	1	1	1	1	1	1	1	1	1	1	1	1	1	1	1	1	0	1	1	0	1	1	1	1
K03625	Protein families: genetic information processing	nusB; transcription antitermination protein NusB	1	1	1	1	1	1	1	1	1	1	1	1	1	1	1	1	1	1	0	1	1	1	1	2	1	1	0	1	1	2	1
K03628	Folding, sorting and degradation	rho; transcription termination factor Rho	1	1	1	1	1	1	1	1	1	1	1	1	1	1	1	1	2	1	1	1	1	1	1	1	1	1	1	1	2	2	1
K03628	Folding, sorting and degradation	rho; transcription termination factor Rho	1	1	1	1	1	1	1	1	1	1	1	1	1	1	1	1	2	1	1	1	1	1	1	1	1	1	1	1	2	2	1
K03629	Replication and repair	recF; DNA replication and repair protein RecF	1	1	1	1	1	1	1	0	1	1	1	1	1	1	1	1	1	1	0	1	1	1	1	1	1	1	1	1	2	2	1
K03630	Unclassified: genetic information processing	radC; DNA repair protein RadC	0	0	0	0	0	0	0	0	0	1	1	0	0	1	0	1	1	1	1	1	0	0	1	1	1	1	0	1	1	1	1
K03631	Protein families: genetic information processing	recN; DNA repair protein RecN (Recombination protein N)	1	1	2	1	1	1	1	1	1	1	1	1	1	1	1	1	1	1	0	1	1	1	1	1	1	1	1	1	1	1	1
K03640	Protein families: signaling and cellular processes	pal; peptidoglycan-associated lipoprotein	0	0	0	0	0	0	0	0	0	0	0	0	0	0	0	0	0	0	0	0	0	0	0	0	0	0	0	0	0	1	0
K03641	Protein families: signaling and cellular processes	tolB; TolB protein	1	1	1	0	1	0	1	0	0	0	1	1	1	0	0	0	0	0	0	0	1	0	1	2	2	1	0	0	0	1	0
K03642	Unclassified: signaling and cellular processes	rlpA; rare lipoprotein A	1	1	1	1	1	1	1	1	1	1	1	1	1	1	1	1	1	2	0	1	1	1	1	1	1	1	1	1	1	1	1
K03644	Metabolism of cofactors and vitamins	lipA, LIAS, LIP1, LIP5; lipoyl synthase [EC:2.8.1.8]	2	2	3	2	2	2	2	2	2	2	2	3	2	2	2	2	2	2	2	2	2	2	0	2	0	1	0	0	0	0	0
K03646	Protein families: signaling and cellular processes	tolA; colicin import membrane protein	0	0	0	0	0	0	0	0	1	1	0	0	0	0	0	1	0	0	0	1	0	0	0	0	0	0	0	0	0	0	0
K03648	Replication and repair	UNG, UDG; uracil-DNA glycosylase [EC:3.2.2.27]	0	0	0	0	0	0	0	0	0	0	0	0	0	0	0	0	0	0	0	0	0	0	0	0	0	0	0	1	0	0	0
K03650	Protein families: genetic information processing	mnmE, trmE, MSS1; tRNA modification GTPase [EC:3.6.-.-]	2	3	2	2	2	2	2	2	1	2	2	1	3	2	1	2	3	2	1	2	2	2	2	2	1	2	0	2	1	3	2
K03650	Protein families: genetic information processing	mnmE, trmE, MSS1; tRNA modification GTPase [EC:3.6.-.-]	2	3	2	2	2	2	2	2	1	2	2	1	3	2	1	2	3	2	1	2	2	2	2	2	1	2	0	2	1	3	2
K03651	Nucleotide metabolism	cpdA; 3',5'-cyclic-AMP phosphodiesterase [EC:3.1.4.53]	1	1	1	1	0	0	1	1	0	0	0	0	1	0	0	0	0	0	0	0	1	1	0	0	0	0	0	0	0	0	0
K03653	Unclassified: metabolism	K03653; N-glycosylase/DNA lyase [EC:3.2.2.- 4.2.99.18]	0	0	0	0	0	0	0	0	1	1	0	0	0	1	0	1	0	0	0	1	0	0	0	0	0	0	0	0	0	0	0
K03654	Folding, sorting and degradation	recQ; ATP-dependent DNA helicase RecQ [EC:5.6.2.4]	0	0	0	0	0	1	0	2	0	0	0	0	0	0	1	1	0	0	2	0	0	0	1	1	1	1	0	1	1	0	1
K03654	Folding, sorting and degradation	recQ; ATP-dependent DNA helicase RecQ [EC:5.6.2.4]	0	0	0	0	0	1	0	2	0	0	0	0	0	0	1	1	0	0	2	0	0	0	1	1	1	1	0	1	1	0	1
K03655	Replication and repair	recG; ATP-dependent DNA helicase RecG [EC:5.6.2.4]	1	2	2	2	1	1	1	2	2	2	2	2	1	2	2	1	1	2	1	2	4	2	1	2	1	2	2	1	1	2	2
K03657	Replication and repair	uvrD, pcrA; ATP-dependent DNA helicase UvrD/PcrA [EC:5.6.2.4]	1	1	1	1	1	1	1	1	3	2	1	0	1	3	1	4	2	2	1	2	3	3	2	3	3	1	2	5	2	3	1
K03657	Replication and repair	uvrD, pcrA; ATP-dependent DNA helicase UvrD/PcrA [EC:5.6.2.4]	1	1	1	1	1	1	1	1	3	2	1	0	1	3	1	4	2	2	1	2	3	3	2	3	3	1	2	5	2	3	1
K03658	Protein families: genetic information processing	helD; DNA helicase IV [EC:5.6.2.4]	0	0	0	0	0	0	1	0	1	1	0	0	0	1	0	1	1	1	0	1	2	2	1	1	2	1	1	1	1	2	2
K03664	Unclassified: genetic information processing	smpB; SsrA-binding protein	1	1	1	1	1	1	1	1	1	1	1	0	1	1	1	1	1	1	0	1	1	1	1	0	1	1	1	1	0	1	0
K03665	Protein families: genetic information processing	hflX; GTPase	1	1	1	1	1	1	1	1	1	1	1	1	0	1	1	1	1	1	0	1	1	1	1	2	1	1	1	1	1	1	1
K03667	Protein families: genetic information processing	hslU; ATP-dependent HslUV protease ATP-binding subunit HslU	1	1	2	1	1	1	1	0	1	1	1	1	1	1	1	1	1	1	0	1	1	1	1	1	1	1	1	1	1	1	1
K03668	Unclassified: genetic information processing	hslJ; heat shock protein HslJ	0	1	1	1	1	0	0	0	0	0	0	0	0	0	0	0	0	0	0	0	1	1	0	0	0	0	0	0	0	0	0
K03671	Immune system	trxA; thioredoxin 1	1	1	1	1	1	1	1	2	1	2	1	2	0	2	1	2	3	1	1	2	1	1	3	2	4	3	0	2	4	2	4
K03671	Immune system	trxA; thioredoxin 1	1	1	1	1	1	1	1	2	1	2	1	2	0	2	1	2	3	1	1	2	1	1	3	2	4	3	0	2	4	2	4
K03676	Protein families: genetic information processing	grxC, GLRX, GLRX2; glutaredoxin 3	1	1	1	1	1	1	0	1	1	1	1	0	1	1	2	1	1	1	1	1	0	0	1	1	1	1	1	1	1	1	1
K03685	Translation	rnc, DROSHA, RNT1; ribonuclease III [EC:3.1.26.3]	1	1	1	2	1	1	1	2	1	1	1	1	1	1	1	1	1	1	1	1	1	1	1	1	1	1	1	1	1	1	1
K03686	Protein families: genetic information processing	dnaJ; molecular chaperone DnaJ	2	2	2	2	2	2	2	2	2	2	2	2	2	2	2	2	2	2	1	2	2	2	2	3	2	2	3	2	2	2	2
K03687	Protein families: genetic information processing	GRPE; molecular chaperone GrpE	1	1	1	1	1	1	1	1	1	1	1	1	0	1	1	1	1	1	0	1	1	1	1	1	2	1	1	1	1	1	1
K03687	Protein families: genetic information processing	GRPE; molecular chaperone GrpE	1	1	1	1	1	1	1	1	1	1	1	1	0	1	1	1	1	1	0	1	1	1	1	1	2	1	1	1	1	1	1
K03688	Unclassified: metabolism	ubiB, aarF; ubiquinone biosynthesis protein	1	1	1	1	1	1	1	1	1	1	1	1	1	1	1	1	1	1	1	1	1	1	1	3	1	1	1	1	1	1	1
K03695	Aging	clpB; ATP-dependent Clp protease ATP-binding subunit ClpB	0	1	0	0	1	0	0	0	0	0	0	0	0	0	0	0	0	0	0	0	0	0	1	0	2	1	1	1	1	0	0
K03696	Protein families: genetic information processing	clpC; ATP-dependent Clp protease ATP-binding subunit ClpC	2	2	2	1	2	2	2	3	2	2	2	2	2	2	2	2	3	2	2	2	2	2	2	2	2	2	2	2	2	2	2
K03698	Protein families: genetic information processing	cbf, cbf1; 3'-5' exoribonuclease [EC:3.1.-.-]	0	0	0	0	0	0	0	0	0	0	0	0	0	0	0	0	0	0	0	0	0	0	0	0	0	0	0	0	1	0	0
K03699	Protein families: signaling and cellular processes	tlyC; magnesium and cobalt exporter, CNNM family	1	1	1	1	1	1	1	1	1	1	1	0	1	1	1	1	1	1	1	1	1	1	1	1	1	1	1	1	1	1	1
K03701	Replication and repair	uvrA; excinuclease ABC subunit A	1	1	3	2	1	1	1	2	1	1	1	1	1	1	1	1	1	1	0	1	1	1	1	2	1	1	1	1	1	1	1
K03702	Replication and repair	uvrB; excinuclease ABC subunit B	1	1	1	1	1	1	1	1	1	1	1	1	1	1	1	1	1	1	0	1	1	1	1	1	1	1	1	1	1	1	1
K03703	Replication and repair	uvrC; excinuclease ABC subunit C	1	1	1	1	1	1	1	1	1	2	1	2	1	1	1	1	1	1	1	1	1	1	1	1	1	1	1	1	1	1	1
K03703	Replication and repair	uvrC; excinuclease ABC subunit C	1	1	1	1	1	1	1	1	1	2	1	2	1	1	1	1	1	1	1	1	1	1	1	1	1	1	1	1	1	1	1
K03704	Unclassified: genetic information processing	cspA; cold shock protein	2	2	3	2	2	2	2	1	1	1	2	0	2	1	1	2	1	1	1	1	2	2	1	2	2	1	0	1	1	1	2
K03707	Metabolism of cofactors and vitamins	tenA; thiaminase (transcriptional activator TenA) [EC:3.5.99.2]	1	1	1	1	1	1	1	1	0	0	1	0	1	0	0	0	0	0	0	0	1	1	0	0	0	0	0	0	0	0	0
K03708	Protein families: genetic information processing	ctsR; transcriptional regulator of stress and heat shock response	1	1	1	1	1	1	1	1	1	1	1	1	1	1	1	1	1	1	1	1	1	1	1	1	1	1	1	1	1	1	1
K03709	Protein families: genetic information processing	troR; DtxR family transcriptional regulator, Mn-dependent transcriptional regulator	0	0	0	0	1	0	1	0	0	0	0	0	0	0	0	0	0	0	0	0	0	0	0	1	0	0	0	0	0	1	1
K03710	Protein families: genetic information processing	K03710; GntR family transcriptional regulator	4	5	6	3	3	3	4	5	3	2	6	1	2	2	1	2	2	3	2	3	6	7	2	3	5	6	3	3	3	3	4
K03711	Protein families: genetic information processing	fur, zur, furB; Fur family transcriptional regulator, ferric uptake regulator	2	2	2	2	3	2	2	2	2	3	3	0	1	3	2	3	2	3	2	4	2	3	2	2	3	3	1	2	2	3	3
K03711	Protein families: genetic information processing	fur, zur, furB; Fur family transcriptional regulator, ferric uptake regulator	2	2	2	2	3	2	2	2	2	3	3	0	1	3	2	3	2	3	2	4	2	3	2	2	3	3	1	2	2	3	3
K03716	Unclassified: metabolism	splB; spore photoproduct lyase [EC:4.1.99.14]	0	0	0	0	0	0	0	0	0	1	0	0	0	0	0	0	0	0	0	0	0	0	0	0	0	0	0	0	0	0	0
K03719	Protein families: genetic information processing	lrp; Lrp/AsnC family transcriptional regulator, leucine-responsive regulatory protein	0	0	0	0	0	0	0	0	0	0	0	0	0	0	0	0	0	0	0	0	0	0	1	1	1	1	0	0	0	0	1
K03723	Replication and repair	mfd; transcription-repair coupling factor (superfamily II helicase) [EC:5.6.2.4]	1	1	1	3	1	1	1	2	1	1	1	0	1	1	1	1	1	1	2	1	1	1	1	1	1	1	1	1	1	1	1
K03724	Protein families: genetic information processing	lhr; ATP-dependent helicase Lhr and Lhr-like helicase [EC:3.6.4.13 5.6.2.4]	0	0	1	0	0	0	0	0	0	0	0	0	0	0	0	0	0	0	0	0	0	0	0	0	1	0	0	0	0	0	0
K03733	Protein families: genetic information processing	xerC; integrase/recombinase XerC	2	2	2	4	2	2	2	2	1	3	2	1	4	2	2	3	3	1	1	4	2	2	3	2	2	1	1	2	2	4	2
K03734	Unclassified: metabolism	apbE; FAD:protein FMN transferase [EC:2.7.1.180]	1	1	1	1	1	1	1	1	1	1	1	0	1	1	1	1	1	1	1	1	1	1	2	1	2	2	1	2	2	2	2
K03734	Unclassified: metabolism	apbE; FAD:protein FMN transferase [EC:2.7.1.180]	1	1	1	1	1	1	1	1	1	1	1	0	1	1	1	1	1	1	1	1	1	1	2	1	2	2	1	2	2	2	2
K03737	Carbohydrate metabolism	por, nifJ; pyruvate-ferredoxin/flavodoxin oxidoreductase [EC:1.2.7.1 1.2.7.-]	0	0	0	0	0	0	0	0	0	0	0	0	0	0	0	0	0	0	0	0	0	0	1	1	2	1	0	1	1	1	1
K03738	Carbohydrate metabolism	aor; aldehyde:ferredoxin oxidoreductase [EC:1.2.7.5]	0	0	0	0	0	0	0	0	1	1	0	1	0	1	0	0	1	0	0	1	0	0	1	0	0	0	1	0	0	0	0
K03741	Unclassified: metabolism	arsC; arsenate reductase (thioredoxin) [EC:1.20.4.4]	0	0	1	0	0	0	0	0	0	0	0	0	0	0	0	0	0	0	0	0	1	1	0	1	0	0	0	0	0	0	0
K03741	Unclassified: metabolism	arsC; arsenate reductase (thioredoxin) [EC:1.20.4.4]	0	0	1	0	0	0	0	0	0	0	0	0	0	0	0	0	0	0	0	0	1	1	0	1	0	0	0	0	0	0	0
K03742	Metabolism of cofactors and vitamins	pncC; nicotinamide-nucleotide amidase [EC:3.5.1.42]	1	1	1	1	1	1	1	1	1	1	1	1	0	1	1	1	1	1	1	1	1	1	1	1	1	1	1	1	1	1	1
K03743	Metabolism of cofactors and vitamins	pncC; nicotinamide-nucleotide amidase [EC:3.5.1.42]	0	1	1	1	0	0	0	1	0	0	0	1	0	0	0	0	0	0	1	0	2	2	1	1	1	1	1	1	1	1	1
K03744	Poorly characterized	lemA; LemA protein	1	1	1	1	1	1	1	1	1	1	0	1	0	1	1	1	1	1	1	1	1	1	1	1	1	1	1	1	1	1	1
K03750	Metabolism of cofactors and vitamins	moeA; molybdopterin molybdotransferase [EC:2.10.1.1]	0	0	1	0	0	0	0	0	0	0	0	0	0	0	0	0	0	0	0	0	0	0	0	0	0	0	0	0	0	0	0
K03752	Metabolism of cofactors and vitamins	mobA; molybdenum cofactor guanylyltransferase [EC:2.7.7.77]	2	1	1	2	1	2	2	1	2	2	2	1	1	2	1	2	2	2	1	2	2	2	1	1	1	1	1	1	1	1	1
K03752	Metabolism of cofactors and vitamins	mobA; molybdenum cofactor guanylyltransferase [EC:2.7.7.77]	2	1	1	2	1	2	2	1	2	2	2	1	1	2	1	2	2	2	1	2	2	2	1	1	1	1	1	1	1	1	1
K03753	Unclassified: metabolism	mobB; molybdopterin-guanine dinucleotide biosynthesis adapter protein	0	0	1	0	0	0	0	0	0	0	0	0	0	0	0	0	0	0	0	0	0	0	0	0	0	0	0	0	0	0	0
K03760	Glycan biosynthesis and metabolism	eptA, pmrC; lipid A ethanolaminephosphotransferase [EC:2.7.8.43]	0	0	0	0	0	0	0	1	0	0	0	0	0	0	0	0	0	0	0	0	0	0	0	0	0	0	0	0	0	0	0
K03762	Protein families: signaling and cellular processes	proP; MFS transporter, MHS family, proline/betaine transporter	0	0	0	0	1	0	0	0	0	0	0	0	0	0	0	0	0	0	0	0	0	0	0	0	0	0	0	0	0	0	0
K03769	Protein families: genetic information processing	ppiC; peptidyl-prolyl cis-trans isomerase C [EC:5.2.1.8]	2	2	2	2	3	2	2	3	2	2	2	2	2	2	2	2	3	1	1	2	2	2	2	2	2	2	0	2	2	2	2
K03769	Protein families: genetic information processing	ppiC; peptidyl-prolyl cis-trans isomerase C [EC:5.2.1.8]	2	2	2	2	3	2	2	3	2	2	2	2	2	2	2	2	3	1	1	2	2	2	2	2	2	2	0	2	2	2	2
K03770	Protein families: genetic information processing	ppiD; peptidyl-prolyl cis-trans isomerase D [EC:5.2.1.8]	0	0	0	0	1	0	0	0	0	0	0	0	0	0	0	0	0	0	0	0	0	0	0	0	0	0	0	0	0	0	0
K03778	Carbohydrate metabolism	ldhA; D-lactate dehydrogenase [EC:1.1.1.28]	0	0	0	0	0	0	0	0	0	0	0	1	0	0	0	0	0	0	0	0	0	0	0	1	0	0	0	0	0	0	0
K03780	Carbohydrate metabolism	ttdB; L(+)-tartrate dehydratase beta subunit [EC:4.2.1.32]	0	0	0	0	0	0	0	1	1	1	0	0	0	1	1	1	1	1	1	1	0	0	0	1	0	0	0	0	0	0	0
K03781	Carbohydrate metabolism	katE, CAT, catB, srpA; catalase [EC:1.11.1.6]	0	0	0	0	0	0	0	0	0	0	0	0	0	0	0	0	0	0	0	0	0	0	0	0	3	1	0	1	0	0	0
K03782	Amino acid metabolism	katG; catalase-peroxidase [EC:1.11.1.21]	0	0	0	0	0	0	0	0	0	0	0	0	0	0	0	0	0	0	0	0	1	1	0	0	0	0	0	0	0	0	0
K03783	Nucleotide metabolism	punA, PNP; purine-nucleoside phosphorylase [EC:2.4.2.1]	2	2	2	2	2	2	2	2	2	2	3	2	2	2	2	2	2	1	1	2	2	2	1	1	1	1	0	1	1	1	1
K03786	Amino acid metabolism	aroQ, qutE; 3-dehydroquinate dehydratase II [EC:4.2.1.10]	2	2	2	2	1	2	1	2	2	2	1	2	2	2	1	1	2	2	0	1	1	1	1	1	1	1	0	1	1	1	1
K03786	Amino acid metabolism	aroQ, qutE; 3-dehydroquinate dehydratase II [EC:4.2.1.10]	2	2	2	2	1	2	1	2	2	2	1	2	2	2	1	1	2	2	0	1	1	1	1	1	1	1	0	1	1	1	1
K03787	Nucleotide metabolism	surE; 5'/3'-nucleotidase [EC:3.1.3.5 3.1.3.6]	1	1	1	2	1	1	1	1	1	1	0	2	1	0	1	1	1	1	1	1	1	1	1	1	1	1	0	1	1	1	1
K03789	Protein families: genetic information processing	rimI; [ribosomal protein S18]-alanine N-acetyltransferase [EC:2.3.1.266]	2	1	1	2	1	2	1	1	1	1	1	1	2	1	1	1	1	1	1	1	1	1	1	1	1	1	1	1	1	1	1
K03789	Protein families: genetic information processing	rimI; [ribosomal protein S18]-alanine N-acetyltransferase [EC:2.3.1.266]	2	1	1	2	1	2	1	1	1	1	1	1	2	1	1	1	1	1	1	1	1	1	1	1	1	1	1	1	1	1	1
K03790	Protein families: genetic information processing	rimJ; [ribosomal protein S5]-alanine N-acetyltransferase [EC:2.3.1.267]	1	1	1	1	1	1	1	1	1	1	1	1	1	1	1	1	0	2	0	1	1	1	1	1	1	1	0	1	1	1	1
K03791	Poorly characterized	K03791; putative chitinase	0	0	0	0	0	0	0	1	0	0	0	0	0	0	0	0	0	0	0	0	2	2	0	0	0	0	0	0	0	0	0
K03795	Metabolism of cofactors and vitamins	cbiX; sirohydrochlorin cobaltochelatase [EC:4.99.1.3]	0	0	0	0	0	1	1	0	0	0	0	0	0	0	0	0	0	0	0	0	0	0	0	0	0	0	0	0	0	0	0
K03797	Protein families: metabolism	E3.4.21.102, prc, ctpA; carboxyl-terminal processing protease [EC:3.4.21.102]	1	1	1	1	1	1	1	2	2	2	0	2	1	2	2	2	3	2	1	2	1	1	2	3	2	2	0	2	2	3	2
K03797	Protein families: metabolism	E3.4.21.102, prc, ctpA; carboxyl-terminal processing protease [EC:3.4.21.102]	1	1	1	1	1	1	1	2	2	2	0	2	1	2	2	2	3	2	1	2	1	1	2	3	2	2	0	2	2	3	2
K03798	Protein families: metabolism	ftsH, hflB; cell division protease FtsH [EC:3.4.24.-]	1	1	1	0	1	1	1	1	1	1	1	1	1	1	2	1	1	1	1	1	1	1	1	1	1	1	2	1	1	1	1
K03800	Metabolism of cofactors and vitamins	lplA, lplJ, lipL1; lipoate---protein ligase [EC:6.3.1.20]	1	1	1	1	1	1	1	1	1	1	1	1	1	1	0	1	2	1	0	1	2	1	1	2	1	2	0	1	0	1	1
K03801	Metabolism of cofactors and vitamins	lipB; lipoyl(octanoyl) transferase [EC:2.3.1.181]	1	1	2	2	1	1	1	1	1	1	1	1	1	1	1	1	1	1	1	1	1	1	0	1	0	0	0	0	0	0	0
K03802	Unclassified: metabolism	cphA; cyanophycin synthetase [EC:6.3.2.29 6.3.2.30]	0	0	0	0	0	0	1	1	1	1	0	0	0	1	0	1	1	1	0	1	0	0	0	0	0	0	0	0	0	0	0
K03803	Protein families: genetic information processing	rseC; sigma-E factor negative regulatory protein RseC	0	0	0	0	0	0	0	0	0	0	0	1	0	0	0	0	0	0	1	0	1	1	0	0	0	0	0	0	0	0	0
K03809	Metabolism of cofactors and vitamins	wrbA; NAD(P)H dehydrogenase (quinone) [EC:1.6.5.2]	1	1	1	1	2	1	2	1	1	1	2	0	0	1	1	1	2	1	1	1	1	1	1	1	1	1	1	1	1	2	1
K03816	Nucleotide metabolism	xpt; xanthine phosphoribosyltransferase [EC:2.4.2.22]	0	0	0	0	0	0	0	0	0	0	0	1	0	0	0	0	0	0	1	0	1	1	0	0	0	1	0	0	0	0	0
K03820	Unclassified: metabolism	lnt; apolipoprotein N-acyltransferase [EC:2.3.1.269]	0	0	1	0	0	0	0	0	0	0	0	0	0	0	0	0	0	0	0	0	0	0	0	0	0	0	0	0	0	0	0
K03821	Carbohydrate metabolism	phaC, phbC; poly[(R)-3-hydroxyalkanoate] polymerase subunit PhaC [EC:2.3.1.304]	0	0	0	0	0	0	0	0	0	0	0	0	0	0	0	0	0	0	0	0	0	0	0	0	0	0	0	1	0	0	0
K03823	Metabolism of other amino acids	pat, bar; phosphinothricin acetyltransferase [EC:2.3.1.183]	1	1	1	1	1	1	1	2	1	2	1	1	0	1	1	1	1	1	1	1	1	1	0	2	1	1	0	1	1	0	0
K03829	Unclassified: metabolism	yedL; putative acetyltransferase [EC:2.3.1.-]	0	0	0	0	0	0	0	0	0	0	0	0	0	0	0	0	0	0	0	0	0	0	1	0	1	0	0	1	1	1	1
K03832	Protein families: signaling and cellular processes	tonB; periplasmic protein TonB	0	0	0	0	0	1	0	1	1	1	0	0	0	0	0	1	0	0	0	1	0	0	0	0	0	0	0	0	0	0	0
K03832	Protein families: signaling and cellular processes	tonB; periplasmic protein TonB	0	0	0	0	0	1	0	1	1	1	0	0	0	0	0	1	0	0	0	1	0	0	0	0	0	0	0	0	0	0	0
K03839	Unclassified: metabolism	fldA, nifF, isiB; flavodoxin I	0	0	0	0	0	0	0	0	0	0	0	0	0	0	0	0	0	0	0	0	0	0	1	0	1	1	0	1	2	0	1
K03856	Amino acid metabolism	AROA2, aroA; 3-deoxy-7-phosphoheptulonate synthase [EC:2.5.1.54]	2	2	5	2	2	2	2	2	2	2	2	1	1	2	2	2	2	2	1	2	2	2	2	2	2	2	1	2	1	2	2
K03856	Amino acid metabolism	AROA2, aroA; 3-deoxy-7-phosphoheptulonate synthase [EC:2.5.1.54]	2	2	5	2	2	2	2	2	2	2	2	1	1	2	2	2	2	2	1	2	2	2	2	2	2	2	1	2	1	2	2
K03892	Protein families: genetic information processing	arsR; ArsR family transcriptional regulator, arsenate/arsenite/antimonite-responsive transcriptional repressor	1	1	0	1	0	2	1	0	0	0	1	2	1	0	0	0	0	0	1	0	4	4	2	3	3	3	0	1	0	0	3
K03892	Protein families: genetic information processing	arsR; ArsR family transcriptional regulator, arsenate/arsenite/antimonite-responsive transcriptional repressor	1	1	0	1	0	2	1	0	0	0	1	2	1	0	0	0	0	0	1	0	4	4	2	3	3	3	0	1	0	0	3
K03925	Poorly characterized	mraZ; transcriptional regulator MraZ	1	1	1	1	1	1	1	1	1	1	1	1	1	1	1	1	1	1	1	1	1	1	1	1	1	1	1	1	1	1	1
K03929	Unclassified: metabolism	pnbA; para-nitrobenzyl esterase [EC:3.1.1.-]	1	1	2	1	1	0	0	0	0	0	0	0	1	0	0	0	0	0	0	0	0	0	1	0	1	0	0	0	1	0	1
K03933	Poorly characterized	cpbD; chitin-binding protein	0	0	0	0	0	0	0	0	0	0	0	0	0	0	0	0	0	0	0	0	0	0	1	0	1	1	0	1	1	0	1
K03973	Protein families: genetic information processing	pspC; phage shock protein C	1	1	1	1	0	1	1	1	1	1	1	0	0	1	1	0	1	0	1	1	1	1	0	1	1	1	0	2	1	1	0
K03975	Poorly characterized	dedA; membrane-associated protein	0	0	0	0	0	0	0	0	0	0	0	0	0	0	0	0	0	0	0	0	0	0	0	0	0	0	0	0	0	1	0
K03977	Protein families: genetic information processing	engA, der; GTPase	2	2	3	2	2	3	3	2	2	2	2	2	2	2	3	2	2	2	0	2	2	2	2	2	2	2	3	2	2	2	2
K03977	Protein families: genetic information processing	engA, der; GTPase	2	2	3	2	2	3	3	2	2	2	2	2	2	2	3	2	2	2	0	2	2	2	2	2	2	2	3	2	2	2	2
K03979	Protein families: genetic information processing	obgE, cgtA, MTG2; GTPase [EC:3.6.5.-]	1	1	1	1	1	1	1	1	1	1	1	1	1	1	1	1	1	1	1	1	1	1	1	1	1	1	2	1	1	2	1
K03980	Protein families: metabolism	murJ, mviN; putative peptidoglycan lipid II flippase	1	1	2	2	2	1	2	2	2	1	2	0	1	1	1	1	1	1	1	1	1	1	1	1	1	1	0	0	1	2	1
K04021	Carbohydrate metabolism	eutE; aldehyde dehydrogenase	1	1	2	1	1	0	4	1	0	0	0	0	1	0	0	0	0	0	1	0	0	1	1	1	1	1	3	1	1	0	2
K04027	Unclassified: metabolism	eutM; ethanolamine utilization protein EutM	1	1	1	1	1	0	2	1	0	0	0	0	1	0	0	0	0	1	1	0	0	1	1	2	1	2	1	1	2	0	1
K04028	Unclassified: metabolism	eutN; ethanolamine utilization protein EutN	4	4	4	4	4	0	6	4	0	0	0	0	4	0	0	0	0	2	4	0	0	4	4	4	4	4	6	4	4	0	6
K04034	Metabolism of cofactors and vitamins	bchE; anaerobic magnesium-protoporphyrin IX monomethyl ester cyclase [EC:1.21.98.3]	0	0	0	0	0	1	0	1	0	1	0	0	0	1	0	1	1	1	1	1	0	0	1	1	1	1	1	1	0	1	1
K04042	Carbohydrate metabolism	glmU; bifunctional UDP-N-acetylglucosamine pyrophosphorylase / glucosamine-1-phosphate N-acetyltransferase [EC:2.7.7.23 2.3.1.157]	1	1	1	1	1	1	1	1	1	1	1	1	1	1	1	1	1	1	0	1	1	1	1	1	1	1	1	1	1	1	1
K04043	Folding, sorting and degradation	dnaK, HSPA9; molecular chaperone DnaK	2	1	2	1	1	1	1	1	1	1	3	1	2	1	1	1	2	1	0	1	1	1	1	1	1	1	1	1	1	2	1
K04061	Protein families: signaling and cellular processes	flhB2; flagellar biosynthesis protein	1	1	1	1	1	1	1	1	1	1	1	1	1	1	1	1	1	1	0	1	1	1	0	0	0	0	0	0	0	0	0
K04063	Unclassified: metabolism	osmC, ohr; lipoyl-dependent peroxiredoxin [EC:1.11.1.28]	0	0	0	0	0	0	1	0	0	0	0	0	0	0	0	0	0	0	0	0	1	1	1	2	1	1	0	1	1	1	1
K04065	Poorly characterized	osmY; hyperosmotically inducible periplasmic protein	0	0	0	0	0	0	0	0	0	0	0	0	0	0	0	0	0	0	0	0	0	0	0	0	1	0	0	0	0	0	0
K04066	Replication and repair	priA; primosomal protein N' (replication factor Y) (superfamily II helicase) [EC:5.6.2.4]	1	1	1	1	1	1	1	2	1	1	1	1	1	1	1	1	2	1	1	2	1	1	1	1	1	1	1	1	1	1	1
K04068	Unclassified: metabolism	nrdG; anaerobic ribonucleoside-triphosphate reductase activating protein [EC:1.97.1.4]	0	1	0	0	1	0	0	0	0	0	0	0	0	0	0	0	0	0	0	0	0	0	0	0	0	0	0	0	0	0	0
K04069	Unclassified: metabolism	pflA, pflC, pflE; pyruvate formate lyase activating enzyme [EC:1.97.1.4]	4	4	3	3	3	3	4	4	3	3	3	1	2	4	2	2	3	2	1	3	4	4	2	4	2	3	3	3	2	2	2
K04070	Unclassified: metabolism	pflX; putative pyruvate formate lyase activating enzyme [EC:1.97.1.4]	1	1	1	1	1	1	1	1	1	1	1	1	1	1	1	1	1	1	0	1	1	1	1	1	1	1	1	1	1	1	0
K04072	Carbohydrate metabolism	adhE; acetaldehyde dehydrogenase / alcohol dehydrogenase [EC:1.2.1.10 1.1.1.1]	0	0	0	0	0	0	0	0	0	0	0	0	0	0	0	0	0	0	1	0	0	0	0	0	0	0	0	0	0	0	0
K04073	Carbohydrate metabolism	mhpF; acetaldehyde dehydrogenase [EC:1.2.1.10]	0	0	0	0	0	0	0	0	0	0	0	0	0	0	0	0	0	0	0	0	0	0	0	0	0	1	0	0	1	1	0
K04075	Protein families: genetic information processing	tilS, mesJ; tRNA(Ile)-lysidine synthase [EC:6.3.4.19]	4	4	3	3	2	3	4	4	2	2	3	2	3	2	4	2	3	1	0	2	2	2	3	4	4	2	2	3	2	5	3
K04075	Protein families: genetic information processing	tilS, mesJ; tRNA(Ile)-lysidine synthase [EC:6.3.4.19]	4	4	3	3	2	3	4	4	2	2	3	2	3	2	4	2	3	1	0	2	2	2	3	4	4	2	2	3	2	5	3
K04076	Protein families: metabolism	lonB; ATP-dependent Lon protease [EC:3.4.21.53]	1	1	1	1	1	1	1	1	1	2	1	1	1	1	1	1	1	2	2	1	1	1	1	1	2	1	1	1	1	2	1
K04077	Folding, sorting and degradation	groEL, HSPD1; chaperonin GroEL [EC:5.6.1.7]	2	2	2	3	2	2	1	2	3	2	2	2	2	2	4	2	1	3	2	2	2	2	2	2	2	2	1	2	2	2	2
K04078	Protein families: genetic information processing	groES, HSPE1; chaperonin GroES	1	1	1	1	1	1	0	1	1	1	1	1	0	1	1	1	1	1	1	1	1	1	1	1	1	1	1	1	1	1	1
K04079	Folding, sorting and degradation	HSP90A, htpG; molecular chaperone HtpG	0	0	0	0	0	0	0	0	0	0	0	0	0	0	0	0	0	0	0	0	0	0	0	0	0	1	0	0	0	0	0
K04083	Protein families: genetic information processing	hslO; molecular chaperone Hsp33	1	1	1	1	1	1	1	1	1	1	1	0	1	1	1	1	1	1	1	1	1	1	0	0	0	0	0	0	0	0	0
K04084	Protein families: genetic information processing	dsbD, dipZ; thioredoxin:protein disulfide reductase [EC:1.8.4.16]	0	0	0	0	0	0	0	0	0	0	0	0	0	0	0	0	0	0	0	0	0	0	1	0	1	1	0	1	1	0	1
K04087	Protein families: metabolism	hflC; modulator of FtsH protease HflC	1	1	2	1	1	1	2	2	2	2	1	0	2	2	1	2	2	4	0	2	2	2	1	1	1	1	0	1	1	1	1
K04088	Protein families: metabolism	hflK; modulator of FtsH protease HflK	2	1	3	2	1	1	1	1	1	1	1	0	2	1	1	1	1	1	0	1	1	1	1	1	1	1	0	1	1	1	1
K04092	Amino acid metabolism	tyrA1; chorismate mutase [EC:5.4.99.5]	0	0	0	0	0	0	0	0	0	0	0	0	0	0	0	0	0	0	0	0	0	0	0	0	0	0	1	0	0	0	0
K04093	Amino acid metabolism	pheA1; chorismate mutase [EC:5.4.99.5]	0	0	0	0	0	0	0	0	0	0	0	0	0	0	0	0	0	0	0	0	0	0	0	0	0	0	1	0	0	0	0
K04096	Unclassified: genetic information processing	smf; DNA processing protein	3	4	2	5	4	4	3	6	3	3	4	2	3	4	4	3	4	3	2	3	4	4	4	4	5	5	0	2	4	2	4
K04096	Unclassified: genetic information processing	smf; DNA processing protein	3	4	2	5	4	4	3	6	3	3	4	2	3	4	4	3	4	3	2	3	4	4	4	4	5	5	0	2	4	2	4
K04101	Xenobiotics biodegradation and metabolism	ligB; protocatechuate 4,5-dioxygenase, beta chain [EC:1.13.11.8]	0	0	0	0	0	0	0	0	1	1	0	0	0	1	0	1	1	1	1	2	0	0	0	0	0	0	0	0	0	0	0
K04477	Poorly characterized	ycdX; putative hydrolase	2	2	2	2	2	2	2	2	2	2	2	1	2	2	2	3	2	2	1	2	2	2	2	2	2	2	1	2	2	2	1
K04477	Poorly characterized	ycdX; putative hydrolase	2	2	2	2	2	2	2	2	2	2	2	1	2	2	2	3	2	2	1	2	2	2	2	2	2	2	1	2	2	2	1
K04480	Energy metabolism	mtaB; methanol---5-hydroxybenzimidazolylcobamide Co-methyltransferase [EC:2.1.1.90]	0	0	0	0	0	1	0	0	0	0	0	0	0	0	0	0	0	0	0	0	0	0	0	0	0	0	0	0	0	0	0
K04485	Protein families: genetic information processing	radA, sms; DNA repair protein RadA/Sms	1	1	1	1	1	1	1	2	1	1	1	1	1	1	1	1	1	1	1	1	1	1	1	1	1	1	1	1	1	2	1
K04486	Amino acid metabolism	E3.1.3.15B; histidinol-phosphatase (PHP family) [EC:3.1.3.15]	1	1	1	1	1	1	1	1	1	1	1	1	0	1	2	2	2	1	1	1	1	1	1	1	1	1	1	1	1	1	1
K04486	Amino acid metabolism	E3.1.3.15B; histidinol-phosphatase (PHP family) [EC:3.1.3.15]	1	1	1	1	1	1	1	1	1	1	1	1	0	1	2	2	2	1	1	1	1	1	1	1	1	1	1	1	1	1	1
K04487	Metabolism of cofactors and vitamins	iscS, NFS1; cysteine desulfurase [EC:2.8.1.7]	1	1	2	1	1	1	1	1	0	0	2	0	0	0	0	0	0	0	0	0	1	1	1	3	1	1	1	1	2	1	1
K04488	Unclassified: metabolism	iscU, nifU; nitrogen fixation protein NifU and related proteins	2	2	3	2	1	1	1	1	0	0	1	0	2	0	0	0	0	0	0	0	2	2	0	0	0	0	0	0	0	0	0
K04496	Signal transduction	CTBP; C-terminal binding protein [EC:1.1.1.428]	0	0	0	0	0	0	0	0	0	0	1	0	0	0	0	0	1	0	0	0	1	1	0	1	0	0	0	0	0	0	0
K04516	Amino acid metabolism	AROA1, aroA; chorismate mutase [EC:5.4.99.5]	0	0	0	0	0	0	0	0	0	0	0	0	0	0	0	0	0	0	0	0	0	0	0	0	0	0	1	0	0	0	0
K04517	Amino acid metabolism	tyrA2; prephenate dehydrogenase [EC:1.3.1.12]	2	2	2	2	1	2	2	2	2	2	2	2	2	2	2	2	2	2	0	2	2	2	2	2	2	2	0	2	2	2	2
K04518	Amino acid metabolism	pheA2; prephenate dehydratase [EC:4.2.1.51]	1	1	2	1	1	1	1	1	1	1	1	0	0	1	1	1	1	1	1	1	1	1	1	1	1	1	1	1	0	1	1
K04567	Translation	KARS, lysS; lysyl-tRNA synthetase, class II [EC:6.1.1.6]	1	1	1	1	1	1	1	2	1	1	1	1	1	1	1	1	1	1	1	1	1	1	1	1	1	1	1	1	1	1	1
K04618	Carbohydrate metabolism	GAOA; galactose oxidase [EC:1.1.3.9]	0	0	1	0	0	0	0	0	0	0	0	0	0	0	0	0	0	0	0	0	0	0	0	0	0	0	0	0	0	0	0
K04651	Protein families: genetic information processing	hypA, hybF; hydrogenase nickel incorporation protein HypA/HybF	0	1	1	0	0	0	0	0	0	0	1	0	1	0	0	0	0	0	0	0	0	0	0	0	0	0	0	0	0	0	0
K04653	Unclassified: genetic information processing	hypC; hydrogenase expression/formation protein HypC	1	1	1	1	0	1	0	0	0	0	1	0	1	0	0	0	0	0	0	0	1	1	0	0	0	0	0	0	0	0	0
K04655	Unclassified: genetic information processing	hypE; hydrogenase expression/formation protein HypE	1	1	2	2	1	1	1	1	1	1	1	0	1	1	1	1	1	1	0	1	1	1	0	0	1	1	0	1	1	0	1
K04720	Metabolism of cofactors and vitamins	cobD; threonine-phosphate decarboxylase [EC:4.1.1.81]	1	1	1	1	1	1	1	1	1	1	1	0	1	1	1	1	1	1	0	1	1	1	1	1	1	1	1	1	1	1	1
K04720	Metabolism of cofactors and vitamins	cobD; threonine-phosphate decarboxylase [EC:4.1.1.81]	1	1	1	1	1	1	1	1	1	1	1	0	1	1	1	1	1	1	0	1	1	1	1	1	1	1	1	1	1	1	1
K04744	Protein families: signaling and cellular processes	lptD, imp, ostA; LPS-assembly protein	3	3	3	3	3	3	2	3	3	3	3	2	3	3	3	2	4	2	3	3	3	3	3	4	3	3	3	3	4	3	3
K04748	Unclassified: metabolism	norQ; nitric oxide reductase NorQ protein	0	1	0	0	0	0	0	0	0	0	0	0	0	0	0	0	0	0	0	0	0	0	0	0	0	0	0	0	0	0	0
K04750	Poorly characterized	phnB; PhnB protein	0	0	0	0	0	0	0	0	1	0	0	0	0	0	0	1	1	1	0	0	0	0	0	0	1	1	0	0	1	0	0
K04751	Signal transduction	glnB; nitrogen regulatory protein P-II 1	0	1	1	1	1	0	1	1	0	0	0	0	1	0	0	0	0	0	1	0	1	1	0	1	0	1	0	0	0	0	0
K04751	Signal transduction	glnB; nitrogen regulatory protein P-II 1	0	1	1	1	1	0	1	1	0	0	0	0	1	0	0	0	0	0	1	0	1	1	0	1	0	1	0	0	0	0	0
K04752	Unclassified: genetic information processing	glnK; nitrogen regulatory protein P-II 2	0	1	1	1	1	0	1	1	1	1	0	0	1	1	1	1	1	1	1	1	1	1	2	3	2	2	1	2	1	2	2
K04752	Unclassified: genetic information processing	glnK; nitrogen regulatory protein P-II 2	0	1	1	1	1	0	1	1	1	1	0	0	1	1	1	1	1	1	1	1	1	1	2	3	2	2	1	2	1	2	2
K04755	Unclassified: metabolism	fdx; ferredoxin, 2Fe-2S	0	0	1	0	0	1	0	0	1	1	0	1	0	1	2	1	0	1	0	1	0	0	0	1	0	0	0	0	0	0	0
K04757	Protein families: metabolism	rsbW; serine/threonine-protein kinase RsbW [EC:2.7.11.1]	2	0	2	0	0	0	0	2	0	0	0	0	0	0	0	0	0	0	0	0	0	0	0	0	0	0	0	0	0	0	0
K04757	Protein families: metabolism	rsbW; serine/threonine-protein kinase RsbW [EC:2.7.11.1]	2	0	2	0	0	0	0	2	0	0	0	0	0	0	0	0	0	0	0	0	0	0	0	0	0	0	0	0	0	0	0
K04758	Protein families: signaling and cellular processes	feoA; ferrous iron transport protein A	1	1	1	1	2	1	2	1	1	1	1	0	0	1	1	1	0	1	0	1	1	1	1	2	1	1	0	1	1	3	3
K04758	Protein families: signaling and cellular processes	feoA; ferrous iron transport protein A	1	1	1	1	2	1	2	1	1	1	1	0	0	1	1	1	0	1	0	1	1	1	1	2	1	1	0	1	1	3	3
K04759	Protein families: signaling and cellular processes	feoB; ferrous iron transport protein B	1	1	1	1	2	1	2	1	1	1	2	0	0	1	1	1	0	1	0	2	1	2	1	2	1	1	1	1	1	2	2
K04762	Protein families: genetic information processing	hslR; ribosome-associated heat shock protein Hsp15	0	0	0	0	0	0	0	0	0	0	0	0	0	0	0	0	0	0	0	0	1	1	0	0	0	0	0	0	0	0	0
K04763	Protein families: genetic information processing	xerD; integrase/recombinase XerD	2	2	2	3	2	2	2	3	3	4	2	2	2	2	2	3	3	1	1	4	2	2	4	5	2	2	1	2	2	4	2
K04763	Protein families: genetic information processing	xerD; integrase/recombinase XerD	2	2	2	3	2	2	2	3	3	4	2	2	2	2	2	3	3	1	1	4	2	2	4	5	2	2	1	2	2	4	2
K04765	Nucleotide metabolism	mazG; nucleoside triphosphate diphosphatase [EC:3.6.1.9]	1	1	1	1	1	1	1	1	1	1	1	0	1	1	1	1	1	1	1	1	1	1	1	1	1	1	1	1	1	1	1
K04767	Unclassified: metabolism	acuB; acetoin utilization protein AcuB	1	1	1	1	1	1	1	1	2	2	1	1	1	2	0	2	2	2	0	2	1	1	2	1	2	2	1	2	2	2	2
K04767	Unclassified: metabolism	acuB; acetoin utilization protein AcuB	1	1	1	1	1	1	1	1	2	2	1	1	1	2	0	2	2	2	0	2	1	1	2	1	2	2	1	2	2	2	2
K04770	Protein families: metabolism	lonH; Lon-like ATP-dependent protease [EC:3.4.21.-]	1	1	1	1	1	1	1	1	1	2	1	1	1	1	1	1	1	2	2	1	1	1	1	1	2	1	1	1	1	2	1
K04771	Signal transduction	degP, htrA; serine protease Do [EC:3.4.21.107]	1	1	1	1	2	3	2	2	1	1	3	1	2	1	2	2	1	1	2	2	2	2	5	5	4	5	4	5	3	5	5
K04773	Protein families: metabolism	sppA; protease IV [EC:3.4.21.-]	1	1	1	1	1	1	1	1	1	1	1	1	1	1	1	1	1	1	1	1	1	1	1	1	2	1	1	1	1	1	1
K04940	Unclassified: metabolism	odh; opine dehydrogenase [EC:1.5.1.28]	1	1	1	1	0	1	1	1	1	1	1	0	1	0	0	1	1	1	1	1	1	1	1	1	1	1	1	1	1	1	1
K04987	Protein families: signaling and cellular processes	PKD1L1; polycystin 1L1	0	0	1	0	0	0	0	0	0	0	0	0	0	0	0	0	0	0	0	0	0	0	0	0	0	0	0	0	0	0	0
K05299	Energy metabolism	fdhA; formate dehydrogenase (NADP+) alpha subunit [EC:1.17.1.10]	0	0	0	1	0	0	0	0	0	0	0	0	0	0	0	0	0	0	0	0	0	0	0	0	0	0	0	0	0	0	0
K05337	Unclassified: metabolism	fer; ferredoxin	2	2	2	2	1	2	1	1	0	1	1	0	2	1	0	1	1	1	1	1	1	1	1	2	1	1	1	1	1	1	1
K05337	Unclassified: metabolism	fer; ferredoxin	2	2	2	2	1	2	1	1	0	1	1	0	2	1	0	1	1	1	1	1	1	1	1	2	1	1	1	1	1	1	1
K05341	Carbohydrate metabolism	E2.4.1.4; amylosucrase [EC:2.4.1.4]	0	0	1	0	0	0	0	0	0	0	0	0	0	0	0	0	0	0	0	0	0	0	0	0	0	0	0	0	0	0	0
K05346	Protein families: genetic information processing	deoR; deoxyribonucleoside regulator	0	0	0	0	0	0	1	1	0	1	0	0	0	0	1	0	0	0	0	0	0	0	0	0	0	0	0	0	0	0	0
K05349	Carbohydrate metabolism	bglX; beta-glucosidase [EC:3.2.1.21]	1	1	2	1	1	1	1	1	1	3	1	1	1	1	3	1	4	4	1	2	1	1	1	1	1	1	0	3	1	2	1
K05350	Carbohydrate metabolism	bglB; beta-glucosidase [EC:3.2.1.21]	1	2	4	2	3	3	3	1	3	1	1	1	1	1	0	0	1	0	1	1	3	3	0	2	0	1	0	0	0	0	0
K05351	Carbohydrate metabolism	E1.1.1.9; D-xylulose reductase [EC:1.1.1.9]	1	1	1	1	1	1	1	1	1	1	1	0	1	1	1	1	1	1	0	1	0	1	1	1	1	1	1	1	2	1	1
K05362	Glycan biosynthesis and metabolism	murE; UDP-N-acetylmuramoyl-L-alanyl-D-glutamate-L-lysine ligase [EC:6.3.2.7]	0	1	1	0	1	1	1	1	1	1	1	1	1	1	1	1	1	1	0	1	1	1	1	1	1	1	1	1	1	1	1
K05365	Glycan biosynthesis and metabolism	mrcB; penicillin-binding protein 1B [EC:2.4.1.129 3.4.16.4]	1	1	1	1	1	1	1	2	1	1	1	1	1	1	1	1	1	1	1	1	1	1	1	1	1	1	0	1	1	1	1
K05366	Glycan biosynthesis and metabolism	mrcA; penicillin-binding protein 1A [EC:2.4.1.129 3.4.16.4]	1	1	1	1	1	1	1	2	1	1	1	2	1	1	1	1	2	1	1	1	1	1	1	1	1	1	1	1	1	1	1
K05366	Glycan biosynthesis and metabolism	mrcA; penicillin-binding protein 1A [EC:2.4.1.129 3.4.16.4]	1	1	1	1	1	1	1	2	1	1	1	2	1	1	1	1	2	1	1	1	1	1	1	1	1	1	1	1	1	1	1
K05367	Glycan biosynthesis and metabolism	pbpC; penicillin-binding protein 1C [EC:2.4.1.129]	1	1	0	0	1	1	1	1	0	0	1	0	1	0	0	0	0	0	0	0	1	1	0	0	0	0	0	0	0	0	0
K05378	Energy metabolism	cpeC, mpeC; phycoerythrin-associated linker protein	0	1	1	0	1	0	1	1	0	0	0	1	1	0	0	0	0	0	0	0	0	0	0	1	0	0	1	0	0	0	0
K05379	Energy metabolism	cpeD, mpeD; phycoerythrin-associated linker protein	0	1	1	0	1	0	1	1	0	0	0	1	1	0	0	0	0	0	0	0	0	0	0	1	0	0	1	0	0	0	0
K05380	Energy metabolism	cpeE; phycoerythrin-associated linker protein	0	1	1	0	1	0	1	1	0	0	0	1	1	0	0	0	0	0	0	0	0	0	0	1	0	0	1	0	0	0	0
K05384	Energy metabolism	cpeU, mpeU; bilin biosynthesis protein	0	0	0	0	0	0	0	1	0	0	0	0	0	0	0	0	0	0	0	0	0	0	0	0	0	0	0	0	0	0	0
K05385	Energy metabolism	cpeY; bilin biosynthesis protein	0	0	0	0	0	0	0	0	0	0	0	0	0	0	0	0	0	0	0	0	0	0	0	0	0	0	0	0	0	1	0
K05386	Energy metabolism	cpeZ; bilin biosynthesis protein	0	0	0	0	0	0	0	1	0	0	0	0	0	0	0	0	0	0	0	0	0	0	0	0	0	0	0	0	0	0	0
K05499	Protein families: genetic information processing	cytR; LacI family transcriptional regulator, repressor for deo operon, udp, cdd, tsx, nupC, and nupG	2	1	1	2	2	1	3	1	1	1	2	0	0	3	0	0	1	1	0	1	2	3	1	1	2	2	0	0	1	1	2
K05515	Glycan biosynthesis and metabolism	mrdA; penicillin-binding protein 2 [EC:3.4.16.4]	1	1	1	1	1	1	1	1	1	1	1	1	1	1	1	1	1	1	1	1	1	1	1	1	1	1	0	1	1	1	1
K05516	Protein families: genetic information processing	cbpA; curved DNA-binding protein	1	1	1	1	1	1	1	1	1	1	1	1	1	1	1	1	1	1	1	1	1	1	1	2	1	1	1	1	1	1	1
K05516	Protein families: genetic information processing	cbpA; curved DNA-binding protein	1	1	1	1	1	1	1	1	1	1	1	1	1	1	1	1	1	1	1	1	1	1	1	2	1	1	1	1	1	1	1
K05518	Protein families: genetic information processing	rsbX; phosphoserine phosphatase RsbX [EC:3.1.3.3]	1	0	2	0	0	0	0	1	0	0	0	0	0	0	0	0	0	0	0	0	0	0	0	0	0	0	0	0	0	0	0
K05518	Protein families: genetic information processing	rsbX; phosphoserine phosphatase RsbX [EC:3.1.3.3]	1	0	2	0	0	0	0	1	0	0	0	0	0	0	0	0	0	0	0	0	0	0	0	0	0	0	0	0	0	0	0
K05520	Protein families: metabolism	pfpI; protease I [EC:3.5.1.124]	2	2	3	2	2	2	3	3	1	1	2	0	2	1	1	1	1	1	1	1	2	2	1	1	1	1	1	1	1	1	1
K05520	Protein families: metabolism	pfpI; protease I [EC:3.5.1.124]	2	2	3	2	2	2	3	3	1	1	2	0	2	1	1	1	1	1	1	1	2	2	1	1	1	1	1	1	1	1	1
K05554	Metabolism of terpenoids and polyketides	actVII; aromatase [EC:4.2.1.-]	1	1	2	1	1	1	0	1	1	1	1	1	1	1	1	1	1	1	1	1	1	1	1	2	1	1	0	1	1	1	1
K05566	Protein families: signaling and cellular processes	mnhB, mrpB; multicomponent Na+:H+ antiporter subunit B	0	1	1	0	0	0	0	0	0	0	0	0	0	0	0	0	0	0	0	0	0	0	0	0	0	0	0	0	0	0	0
K05567	Protein families: signaling and cellular processes	mnhC, mrpC; multicomponent Na+:H+ antiporter subunit C	0	1	1	0	0	0	0	0	0	0	0	0	0	0	0	0	0	0	0	0	0	0	0	0	0	0	0	0	0	0	0
K05568	Protein families: signaling and cellular processes	mnhD, mrpD; multicomponent Na+:H+ antiporter subunit D	0	1	1	0	0	0	0	0	0	0	0	0	0	0	0	0	0	0	0	0	0	0	0	0	0	0	0	1	0	0	0
K05575	Energy metabolism	ndhD; NAD(P)H-quinone oxidoreductase subunit 4 [EC:7.1.1.2]	0	1	1	0	0	0	0	0	0	0	0	0	0	0	0	0	0	0	0	0	0	0	0	0	0	0	0	0	0	0	0
K05592	Folding, sorting and degradation	deaD, cshA; ATP-dependent RNA helicase DeaD [EC:3.6.4.13]	0	1	1	0	0	0	0	0	0	0	0	0	0	0	0	0	0	0	0	0	0	0	1	1	1	1	0	1	1	1	1
K05592	Folding, sorting and degradation	deaD, cshA; ATP-dependent RNA helicase DeaD [EC:3.6.4.13]	0	1	1	0	0	0	0	0	0	0	0	0	0	0	0	0	0	0	0	0	0	0	1	1	1	1	0	1	1	1	1
K05595	Protein families: signaling and cellular processes	marC; multiple antibiotic resistance protein	1	1	1	1	1	1	1	1	0	0	1	0	1	0	0	0	0	0	0	0	1	1	0	0	0	0	0	0	0	0	0
K05601	Energy metabolism	hcp; hydroxylamine reductase [EC:1.7.99.1]	1	1	1	1	1	1	1	1	1	1	1	0	0	1	1	1	2	1	0	1	4	1	1	2	1	1	1	1	1	1	1
K05606	Carbohydrate metabolism	MCEE, epi; methylmalonyl-CoA/ethylmalonyl-CoA epimerase [EC:5.1.99.1]	0	0	1	0	0	0	0	1	0	0	0	0	0	0	0	0	0	0	0	0	0	0	2	3	2	2	2	2	2	2	2
K05685	Membrane transport	macB; macrolide transport system ATP-binding/permease protein [EC:7.6.2.-]	1	0	0	0	1	1	0	1	1	0	2	1	0	0	0	1	0	0	0	0	1	0	1	1	1	2	2	1	2	1	1
K05710	Amino acid metabolism	hcaC; 3-phenylpropionate/trans-cinnamate dioxygenase ferredoxin component	0	0	0	0	0	0	0	0	1	1	0	1	0	1	1	1	1	1	1	1	0	0	0	0	0	0	0	0	0	0	0
K05713	Amino acid metabolism	mhpB; 2,3-dihydroxyphenylpropionate 1,2-dioxygenase [EC:1.13.11.16]	0	0	0	0	0	0	0	0	1	1	0	0	0	1	0	1	1	1	1	2	0	0	0	0	0	0	0	0	0	0	0
K05770	Signaling molecules and interaction	TSPO, BZRP; translocator protein	0	1	1	1	0	0	0	0	0	0	0	0	1	0	0	0	0	0	0	0	1	1	0	1	1	1	1	1	1	1	1
K05772	Membrane transport	tupA, vupA; tungstate transport system substrate-binding protein	0	0	0	0	0	0	0	0	0	0	0	0	0	0	0	0	0	0	0	0	0	0	0	0	0	0	0	0	0	1	0
K05784	Xenobiotics biodegradation and metabolism	benC-xylZ; benzoate/toluate 1,2-dioxygenase reductase component [EC:1.18.1.-]	0	0	0	0	0	0	0	0	0	0	0	0	0	0	0	0	0	0	0	0	0	0	1	1	1	0	0	1	1	1	1
K05785	Protein families: genetic information processing	rfaH; transcriptional antiterminator RfaH	0	0	0	0	0	0	0	0	0	0	0	0	0	0	0	0	0	0	0	0	0	0	0	0	0	0	0	0	0	1	0
K05788	Protein families: genetic information processing	ihfB, himD; integration host factor subunit beta	0	0	0	0	0	0	0	0	0	0	0	0	0	0	0	0	0	0	0	0	0	0	0	0	0	0	0	0	0	1	0
K05789	Protein families: metabolism	wzzB; chain length determinant protein (polysaccharide antigen chain regulator)	0	0	0	0	0	0	0	0	0	1	0	0	0	0	0	0	1	2	1	0	0	0	1	0	3	1	0	0	1	0	0
K05799	Protein families: genetic information processing	pdhR; GntR family transcriptional regulator, transcriptional repressor for pyruvate dehydrogenase complex	0	0	1	2	1	2	1	0	0	0	0	0	0	0	2	0	0	0	0	1	1	1	1	0	2	2	0	1	2	0	2
K05800	Protein families: genetic information processing	ybaO; Lrp/AsnC family transcriptional regulator	0	0	0	0	0	0	0	0	0	0	0	0	0	0	0	0	0	0	0	0	0	0	1	1	1	1	0	0	0	0	1
K05802	Protein families: signaling and cellular processes	mscK, kefA, aefA; potassium-dependent mechanosensitive channel	0	0	0	0	0	0	0	0	0	0	0	0	0	0	0	0	0	0	0	0	0	0	0	0	1	1	0	0	0	0	1
K05807	Protein families: signaling and cellular processes	bamD; outer membrane protein assembly factor BamD	0	0	0	0	0	0	0	0	0	0	0	0	0	0	0	0	1	0	0	0	0	0	1	0	1	1	1	1	1	1	1
K05808	Protein families: genetic information processing	yhbH; putative sigma-54 modulation protein	1	1	1	1	1	1	1	1	2	1	1	1	2	1	1	1	3	1	1	1	1	1	1	1	1	1	0	1	1	1	1
K05808	Protein families: genetic information processing	yhbH; putative sigma-54 modulation protein	1	1	1	1	1	1	1	1	2	1	1	1	2	1	1	1	3	1	1	1	1	1	1	1	1	1	0	1	1	1	1
K05809	Protein families: genetic information processing	raiA; ribosome-associated inhibitor A	0	0	0	1	0	0	0	0	0	0	0	0	2	0	0	0	0	0	0	0	0	0	0	0	0	0	0	0	0	0	0
K05810	Unclassified: metabolism	LACC1, yfiH; purine-nucleoside/S-methyl-5'-thioadenosine phosphorylase / adenosine deaminase [EC:2.4.2.1 2.4.2.28 3.5.4.4]	1	1	1	1	1	1	1	1	1	1	1	0	1	1	1	1	1	1	0	1	1	1	1	1	1	1	1	1	1	1	0
K05813	Membrane transport	ugpB; sn-glycerol 3-phosphate transport system substrate-binding protein	0	1	0	0	0	0	4	1	2	1	0	1	0	1	0	1	2	1	2	2	1	2	0	0	0	0	0	0	0	0	0
K05814	Membrane transport	ugpA; sn-glycerol 3-phosphate transport system permease protein	5	9	4	8	6	4	8	2	6	6	4	3	4	5	1	2	4	3	3	5	5	4	7	4	6	10	4	8	5	7	5
K05814	Membrane transport	ugpA; sn-glycerol 3-phosphate transport system permease protein	5	9	4	8	6	4	8	2	6	6	4	3	4	5	1	2	4	3	3	5	5	4	7	4	6	10	4	8	5	7	5
K05815	Membrane transport	ugpE; sn-glycerol 3-phosphate transport system permease protein	0	0	0	0	0	0	2	0	0	0	0	0	0	0	0	0	0	0	0	0	0	0	0	1	0	1	0	1	0	0	0
K05815	Membrane transport	ugpE; sn-glycerol 3-phosphate transport system permease protein	0	0	0	0	0	0	2	0	0	0	0	0	0	0	0	0	0	0	0	0	0	0	0	1	0	1	0	1	0	0	0
K05816	Membrane transport	ugpC; sn-glycerol 3-phosphate transport system ATP-binding protein [EC:7.6.2.10]	0	0	0	0	0	0	1	0	0	0	0	0	0	0	0	0	0	0	0	0	0	0	0	0	0	0	0	0	0	0	0
K05820	Protein families: signaling and cellular processes	hcaT; MFS transporter, PPP family, 3-phenylpropionic acid transporter	0	0	0	0	0	0	0	0	2	2	0	0	0	2	0	2	2	2	0	2	1	0	0	0	0	0	0	0	0	0	0
K05820	Protein families: signaling and cellular processes	hcaT; MFS transporter, PPP family, 3-phenylpropionic acid transporter	0	0	0	0	0	0	0	0	2	2	0	0	0	2	0	2	2	2	0	2	1	0	0	0	0	0	0	0	0	0	0
K05828	Amino acid metabolism	lysZ, argB; [amino group carrier protein]-L-2-aminoadipate/L-glutamate 6-kinase [EC:2.7.2.17 2.7.2.19]	1	1	1	1	1	1	0	1	0	0	1	0	1	0	1	0	0	0	1	0	0	1	0	1	0	1	0	0	0	1	0
K05830	Amino acid metabolism	lysJ, argD; [amino-group carrier protein]-gamma-(L-lysyl/L-ornithyl)-L-glutamate aminotransferase [EC:2.6.1.118 2.6.1.124]	1	1	1	1	1	1	0	1	1	1	1	1	1	1	1	1	1	1	1	1	1	1	1	2	1	1	1	1	1	1	1
K05832	Protein families: signaling and cellular processes	K05832; putative tryptophan/tyrosine transport system permease protein	2	2	2	2	2	2	2	2	2	2	2	0	2	2	2	3	2	6	2	2	2	2	2	3	2	2	0	2	2	2	2
K05833	Protein families: signaling and cellular processes	K05833; putative tryptophan/tyrosine transport system ATP-binding protein	2	2	2	2	2	2	2	2	2	2	2	1	3	2	2	3	2	6	2	3	2	2	2	2	2	2	0	2	2	2	2
K05833	Protein families: signaling and cellular processes	K05833; putative tryptophan/tyrosine transport system ATP-binding protein	2	2	2	2	2	2	2	2	2	2	2	1	3	2	2	3	2	6	2	3	2	2	2	2	2	2	0	2	2	2	2
K05837	Protein families: genetic information processing	rodA, mrdB; rod shape determining protein RodA	1	1	1	1	1	1	1	1	1	1	0	1	1	1	1	1	1	1	1	1	1	1	1	1	1	1	0	1	1	1	1
K05838	Protein families: genetic information processing	ybbN; putative thioredoxin	1	1	1	1	0	0	0	0	0	1	0	1	0	1	0	1	2	1	0	1	0	0	1	2	1	1	0	1	1	1	1
K05844	Protein families: genetic information processing	rimK; ribosomal protein S6--L-glutamate ligase [EC:6.3.2.-]	1	1	1	1	1	1	1	1	0	0	1	0	1	0	0	0	0	0	0	0	1	1	0	0	0	0	0	0	0	2	0
K05845	Membrane transport	opuC; osmoprotectant transport system substrate-binding protein	2	2	2	2	2	2	2	2	0	0	2	0	0	0	0	0	0	0	0	0	2	2	0	3	0	2	0	0	0	0	0
K05845	Membrane transport	opuC; osmoprotectant transport system substrate-binding protein	2	2	2	2	2	2	2	2	0	0	2	0	0	0	0	0	0	0	0	0	2	2	0	3	0	2	0	0	0	0	0
K05846	Membrane transport	opuBD; osmoprotectant transport system permease protein	2	2	2	2	2	2	2	2	0	0	2	0	0	0	0	0	0	0	0	0	2	2	0	3	0	2	0	0	0	0	0
K05847	Membrane transport	opuA; osmoprotectant transport system ATP-binding protein [EC:7.6.2.9]	1	1	2	1	1	1	1	1	0	0	1	0	0	0	0	0	0	0	0	0	1	1	0	1	0	2	0	0	0	0	0
K05847	Membrane transport	opuA; osmoprotectant transport system ATP-binding protein [EC:7.6.2.9]	1	1	2	1	1	1	1	1	0	0	1	0	0	0	0	0	0	0	0	0	1	1	0	1	0	2	0	0	0	0	0
K05874	Signal transduction	tsr; methyl-accepting chemotaxis protein I, serine sensor receptor	0	0	1	0	0	0	0	0	0	0	0	0	0	0	0	0	0	0	0	0	0	0	0	0	0	0	0	0	0	0	0
K05875	Signal transduction	tar; methyl-accepting chemotaxis protein II, aspartate sensor receptor	0	0	1	0	0	0	0	0	0	0	0	0	0	0	0	0	1	0	0	0	0	0	0	0	0	0	0	0	0	0	0
K05876	Signal transduction	trg; methyl-accepting chemotaxis protein III, ribose and galactose sensor receptor	0	0	1	0	0	0	0	0	0	0	0	0	0	0	0	0	0	0	0	0	0	0	0	0	0	0	0	0	0	0	0
K05878	Lipid metabolism	dhaK; phosphoenolpyruvate---glycerone phosphotransferase subunit DhaK [EC:2.7.1.121]	1	1	2	1	3	0	1	2	1	1	1	1	1	1	0	1	1	0	0	1	2	2	1	1	1	1	1	1	1	1	1
K05879	Lipid metabolism	dhaL; phosphoenolpyruvate---glycerone phosphotransferase subunit DhaL [EC:2.7.1.121]	1	1	2	1	4	0	1	2	1	2	1	1	1	1	0	1	0	0	0	1	3	3	1	1	1	1	0	1	1	1	1
K05879	Lipid metabolism	dhaL; phosphoenolpyruvate---glycerone phosphotransferase subunit DhaL [EC:2.7.1.121]	1	1	2	1	4	0	1	2	1	2	1	1	1	1	0	1	0	0	0	1	3	3	1	1	1	1	0	1	1	1	1
K05884	Energy metabolism	comC; L-2-hydroxycarboxylate dehydrogenase (NAD+) [EC:1.1.1.337]	0	0	0	0	0	0	0	0	0	0	0	0	0	0	0	0	0	0	0	0	1	1	0	0	0	0	0	0	0	0	0
K05887	Amino acid metabolism	ydiB; quinate/shikimate dehydrogenase [EC:1.1.1.282]	0	1	0	1	0	0	0	1	1	1	0	0	1	2	0	1	1	1	0	1	0	0	0	0	0	1	0	0	0	0	0
K05895	Metabolism of cofactors and vitamins	cobK-cbiJ; precorrin-6A/cobalt-precorrin-6A reductase [EC:1.3.1.54 1.3.1.106]	0	0	0	0	0	1	1	0	0	0	0	0	0	0	0	0	0	0	0	0	0	0	0	0	0	0	0	0	0	0	0
K05913	Xenobiotics biodegradation and metabolism	dad; 2,4'-dihydroxyacetophenone dioxygenase [EC:1.13.11.41]	0	0	0	0	1	1	0	0	0	0	1	1	0	0	1	0	0	0	0	0	1	0	0	0	0	0	0	0	0	0	0
K05919	Unclassified: metabolism	dfx; superoxide reductase [EC:1.15.1.2]	1	1	1	1	1	1	1	1	1	1	2	0	1	1	1	1	1	1	0	1	2	2	0	1	1	1	1	1	1	1	1
K05934	Metabolism of cofactors and vitamins	cobJ, cbiH; precorrin-3B C17-methyltransferase / cobalt-factor III methyltransferase [EC:2.1.1.131 2.1.1.272]	0	0	1	1	1	2	2	0	0	0	0	0	0	0	0	0	0	0	0	0	1	1	1	1	1	1	0	1	1	1	1
K05936	Metabolism of cofactors and vitamins	cobM, cbiF; precorrin-4/cobalt-precorrin-4 C11-methyltransferase [EC:2.1.1.133 2.1.1.271]	2	2	1	3	2	3	3	0	0	0	0	0	2	0	0	0	0	0	0	0	2	2	2	2	2	2	0	2	2	2	3
K05946	Cellular community - prokaryotes	tagA, tarA; N-acetylglucosaminyldiphosphoundecaprenol N-acetyl-beta-D-mannosaminyltransferase [EC:2.4.1.187]	1	3	3	3	1	1	2	2	2	2	1	1	2	2	1	2	2	2	1	2	2	3	2	2	2	2	3	2	2	2	2
K05946	Cellular community - prokaryotes	tagA, tarA; N-acetylglucosaminyldiphosphoundecaprenol N-acetyl-beta-D-mannosaminyltransferase [EC:2.4.1.187]	1	3	3	3	1	1	2	2	2	2	1	1	2	2	1	2	2	2	1	2	2	3	2	2	2	2	3	2	2	2	2
K05982	Protein families: genetic information processing	E3.1.21.7, nfi; deoxyribonuclease V [EC:3.1.21.7]	1	1	1	1	1	1	2	1	1	1	1	1	1	1	1	1	1	1	0	1	2	3	1	1	1	1	0	1	1	1	1
K05982	Protein families: genetic information processing	E3.1.21.7, nfi; deoxyribonuclease V [EC:3.1.21.7]	1	1	1	1	1	1	2	1	1	1	1	1	1	1	1	1	1	1	0	1	2	3	1	1	1	1	0	1	1	1	1
K05989	Unclassified: metabolism	ramA; alpha-L-rhamnosidase [EC:3.2.1.40]	0	0	0	1	1	1	2	0	2	1	2	1	0	2	1	0	1	0	0	2	0	1	2	1	2	1	0	1	1	1	0
K05994	Protein families: metabolism	E3.4.11.10; bacterial leucyl aminopeptidase [EC:3.4.11.10]	0	0	0	0	0	0	0	1	0	0	0	0	0	0	0	0	0	0	0	0	0	0	0	0	0	1	0	0	0	0	0
K05996	Protein families: metabolism	cpt; carboxypeptidase T [EC:3.4.17.18]	0	0	0	0	0	0	0	0	0	0	0	0	0	0	0	0	0	0	0	0	0	0	0	0	0	0	0	0	0	1	0
K06001	Amino acid metabolism	trpB; tryptophan synthase beta chain [EC:4.2.1.20]	1	1	1	1	1	1	1	1	1	1	1	1	1	1	0	1	2	3	1	1	1	1	1	1	1	2	0	1	1	1	1
K06001	Amino acid metabolism	trpB; tryptophan synthase beta chain [EC:4.2.1.20]	1	1	1	1	1	1	1	1	1	1	1	1	1	1	0	1	2	3	1	1	1	1	1	1	1	2	0	1	1	1	1
K06006	Protein families: genetic information processing	cpxP, spy; periplasmic protein CpxP/Spy	1	0	1	1	0	0	0	0	0	0	1	0	1	0	0	0	0	0	0	0	0	0	0	0	0	0	0	0	0	0	0
K06019	Energy metabolism	ppaX; pyrophosphatase PpaX [EC:3.6.1.1]	1	1	1	1	1	1	1	1	1	2	1	0	1	1	1	1	1	1	0	1	1	1	2	2	2	2	2	2	2	2	2
K06024	Protein families: genetic information processing	scpB; segregation and condensation protein B	1	1	1	1	1	1	1	1	1	1	1	1	1	1	1	1	1	1	1	1	1	1	1	1	1	1	0	1	1	1	1
K06041	Glycan biosynthesis and metabolism	kdsD, kpsF; arabinose-5-phosphate isomerase [EC:5.3.1.13]	0	0	0	0	0	0	0	0	0	0	0	1	0	0	0	0	0	0	1	0	0	0	0	0	0	0	0	0	0	0	0
K06042	Metabolism of cofactors and vitamins	cobH-cbiC; precorrin-8X/cobalt-precorrin-8 methylmutase [EC:5.4.99.61 5.4.99.60]	1	1	2	0	1	1	1	0	0	0	0	1	1	0	0	0	0	0	0	0	1	1	1	1	1	1	0	1	3	1	1
K06044	Carbohydrate metabolism	treY, glgY; (1->4)-alpha-D-glucan 1-alpha-D-glucosylmutase [EC:5.4.99.15]	0	1	1	0	1	1	1	1	0	0	1	0	2	0	0	0	0	0	0	0	0	0	0	0	0	0	0	0	0	0	0
K06073	Membrane transport	btuC; vitamin B12 transport system permease protein	0	0	0	0	1	1	0	0	0	0	0	0	0	0	0	0	0	0	0	0	1	0	0	0	0	0	0	0	0	0	0
K06076	Protein families: signaling and cellular processes	fadL; long-chain fatty acid transport protein	0	0	0	0	0	0	0	0	0	0	0	0	0	0	0	0	0	0	0	0	0	0	0	0	0	0	0	0	0	1	0
K06113	Unclassified: metabolism	abnA; arabinan endo-1,5-alpha-L-arabinosidase [EC:3.2.1.99]	0	0	0	0	0	0	0	0	0	0	0	0	0	1	0	0	0	0	0	1	0	0	0	0	0	1	0	0	0	0	0
K06131	Lipid metabolism	clsA_B; cardiolipin synthase A/B [EC:2.7.8.-]	0	0	0	0	0	0	0	0	0	0	0	0	0	0	0	1	0	0	0	0	1	1	0	0	0	0	0	0	0	0	0
K06131	Lipid metabolism	clsA_B; cardiolipin synthase A/B [EC:2.7.8.-]	0	0	0	0	0	0	0	0	0	0	0	0	0	0	0	1	0	0	0	0	1	1	0	0	0	0	0	0	0	0	0
K06133	Metabolism of cofactors and vitamins	LYS5, acpT; 4'-phosphopantetheinyl transferase [EC:2.7.8.-]	0	0	0	0	0	0	1	0	1	1	0	0	0	1	0	0	1	1	1	1	0	1	1	0	1	0	0	1	1	1	1
K06140	Protein families: genetic information processing	rnk; regulator of nucleoside diphosphate kinase	1	1	1	1	1	1	1	1	1	1	1	1	1	1	1	1	1	1	1	1	1	1	1	0	1	1	0	1	1	1	1
K06145	Protein families: genetic information processing	gntR; LacI family transcriptional regulator, gluconate utilization system Gnt-I transcriptional repressor	0	0	0	0	1	0	0	0	0	0	1	0	0	0	0	0	0	0	0	0	0	0	0	0	0	0	0	0	0	0	0
K06147	Protein families: signaling and cellular processes	ABCB-BAC; ATP-binding cassette, subfamily B, bacterial	2	2	3	2	2	0	2	2	7	5	3	3	3	6	4	2	2	5	2	6	0	2	3	3	4	3	0	3	2	2	3
K06147	Protein families: signaling and cellular processes	ABCB-BAC; ATP-binding cassette, subfamily B, bacterial	2	2	3	2	2	0	2	2	7	5	3	3	3	6	4	2	2	5	2	6	0	2	3	3	4	3	0	3	2	2	3
K06148	Protein families: signaling and cellular processes	ABCC-BAC; ATP-binding cassette, subfamily C, bacterial	0	0	0	0	0	0	0	0	0	0	0	0	0	0	0	0	0	0	0	0	0	0	0	0	1	1	0	0	0	0	0
K06153	Glycan biosynthesis and metabolism	bacA; undecaprenyl-diphosphatase [EC:3.6.1.27]	1	1	1	1	1	1	1	1	1	1	1	1	1	1	1	0	0	0	0	1	1	1	1	2	1	1	1	1	1	1	1
K06158	Protein families: genetic information processing	ABCF3; ATP-binding cassette, subfamily F, member 3	0	0	0	0	0	0	0	0	0	0	0	0	0	0	0	0	0	0	0	0	0	0	1	1	2	1	1	1	2	1	2
K06168	Protein families: genetic information processing	miaB; tRNA-2-methylthio-N6-dimethylallyladenosine synthase [EC:2.8.4.3]	1	1	3	1	1	1	1	1	1	1	1	0	1	1	1	1	1	1	1	1	1	1	1	1	1	1	0	1	1	1	1
K06173	Protein families: genetic information processing	truA, PUS1; tRNA pseudouridine38-40 synthase [EC:5.4.99.12]	1	1	1	1	1	1	1	1	1	1	1	0	1	1	1	2	1	1	1	0	1	1	1	1	1	1	1	1	0	1	1
K06177	Protein families: genetic information processing	rluA; tRNA pseudouridine32 synthase / 23S rRNA pseudouridine746 synthase [EC:5.4.99.28 5.4.99.29]	1	0	0	0	0	0	0	0	0	0	0	0	0	0	0	0	0	0	0	0	0	0	1	0	0	0	1	1	2	0	1
K06178	Protein families: genetic information processing	rluB; 23S rRNA pseudouridine2605 synthase [EC:5.4.99.22]	1	1	1	1	1	1	1	1	1	1	1	1	1	1	1	1	1	1	1	1	1	1	1	1	1	1	0	1	1	1	1
K06179	Protein families: genetic information processing	rluC; 23S rRNA pseudouridine955/2504/2580 synthase [EC:5.4.99.24]	0	0	0	0	0	0	0	0	0	0	0	0	0	0	0	0	0	0	0	0	1	1	0	0	0	0	0	0	0	0	0
K06180	Protein families: genetic information processing	rluD; 23S rRNA pseudouridine1911/1915/1917 synthase [EC:5.4.99.23]	1	2	2	1	2	1	2	2	1	1	1	2	2	1	1	1	1	1	1	1	2	2	1	2	1	1	2	1	2	2	1
K06180	Protein families: genetic information processing	rluD; 23S rRNA pseudouridine1911/1915/1917 synthase [EC:5.4.99.23]	1	2	2	1	2	1	2	2	1	1	1	2	2	1	1	1	1	1	1	1	2	2	1	2	1	1	2	1	2	2	1
K06182	Protein families: genetic information processing	rluF; 23S rRNA pseudouridine2604 synthase [EC:5.4.99.21]	0	0	0	0	0	0	1	1	1	1	0	1	0	1	1	1	1	1	1	1	1	1	1	1	1	1	0	1	1	1	1
K06183	Protein families: genetic information processing	rsuA; 16S rRNA pseudouridine516 synthase [EC:5.4.99.19]	0	0	0	0	0	0	1	1	1	1	0	1	0	1	1	1	1	1	1	1	1	1	1	1	1	1	0	1	1	1	1
K06187	Replication and repair	recR; recombination protein RecR	1	1	1	1	1	1	1	1	1	1	1	1	1	1	1	1	1	1	0	1	1	1	1	1	1	1	0	1	1	1	1
K06189	Protein families: signaling and cellular processes	corC, tlyC; hemolysin (HlyC) family protein	0	0	0	0	0	0	0	0	0	0	1	0	0	0	0	0	0	0	0	0	0	0	0	0	0	0	0	0	0	0	0
K06191	Unclassified: genetic information processing	nrdH; glutaredoxin-like protein NrdH	0	0	0	0	0	0	0	0	1	1	0	0	0	1	0	1	1	1	0	1	0	0	1	1	1	1	1	1	1	1	1
K06196	Protein families: signaling and cellular processes	ccdA; cytochrome c-type biogenesis protein	1	2	1	1	1	1	1	1	1	1	1	2	1	1	1	1	1	1	0	2	1	1	3	2	3	2	2	3	3	2	3
K06196	Protein families: signaling and cellular processes	ccdA; cytochrome c-type biogenesis protein	1	2	1	1	1	1	1	1	1	1	1	2	1	1	1	1	1	1	0	2	1	1	3	2	3	2	2	3	3	2	3
K06199	Protein families: signaling and cellular processes	crcB, FEX; fluoride exporter	1	1	1	1	0	0	1	1	0	0	2	0	1	0	0	0	0	0	0	0	1	1	0	1	0	0	0	0	0	0	0
K06204	Cellular community - prokaryotes	dksA; DnaK suppressor protein	1	1	1	1	1	1	1	1	1	1	1	1	1	1	0	1	0	1	1	1	1	1	1	1	1	1	0	1	2	1	1
K06206	Unclassified: metabolism	sfsA; sugar fermentation stimulation protein A	1	1	1	1	1	1	2	1	1	1	0	0	1	1	0	0	1	0	0	1	2	2	2	2	1	2	0	1	1	1	1
K06206	Unclassified: metabolism	sfsA; sugar fermentation stimulation protein A	1	1	1	1	1	1	2	1	1	1	0	0	1	1	0	0	1	0	0	1	2	2	2	2	1	2	0	1	1	1	1
K06207	Unclassified: signaling and cellular processes	typA, bipA; GTP-binding protein	0	0	0	0	0	0	0	0	0	0	0	0	0	0	0	0	0	0	0	0	0	0	0	0	0	0	0	0	0	1	0
K06208	Amino acid metabolism	aroH; chorismate mutase [EC:5.4.99.5]	1	1	1	1	1	1	1	1	1	1	1	1	1	1	1	1	1	1	1	1	1	1	1	1	1	1	1	1	1	1	1
K06212	Protein families: signaling and cellular processes	focA; formate transporter	1	2	2	1	0	1	1	1	1	1	1	0	1	1	0	1	1	1	0	1	1	1	2	2	2	2	2	2	2	2	2
K06212	Protein families: signaling and cellular processes	focA; formate transporter	1	2	2	1	0	1	1	1	1	1	1	0	1	1	0	1	1	1	0	1	1	1	2	2	2	2	2	2	2	2	2
K06213	Protein families: signaling and cellular processes	mgtE; magnesium transporter	1	1	1	2	1	1	1	1	2	2	1	1	1	2	0	2	4	2	1	2	1	1	3	1	2	2	0	2	1	2	2
K06213	Protein families: signaling and cellular processes	mgtE; magnesium transporter	1	1	1	2	1	1	1	1	2	2	1	1	1	2	0	2	4	2	1	2	1	1	3	1	2	2	0	2	1	2	2
K06215	Metabolism of cofactors and vitamins	pdxS, pdx1; pyridoxal 5'-phosphate synthase pdxS subunit [EC:4.3.3.6]	1	1	1	1	0	0	0	0	0	0	1	0	0	0	0	0	0	0	0	0	1	1	0	0	0	0	0	0	0	0	0
K06217	Unclassified: signaling and cellular processes	phoH, phoL; phosphate starvation-inducible protein PhoH and related proteins	1	1	3	1	1	1	1	1	1	1	1	0	1	1	1	1	1	1	0	1	1	1	1	1	1	1	1	1	2	1	1
K06218	Protein families: signaling and cellular processes	relE, stbE; mRNA interferase RelE/StbE	0	0	0	0	0	0	0	0	0	0	0	0	0	0	0	0	1	0	0	0	0	0	3	0	3	4	0	2	1	2	2
K06219	Unclassified: metabolism	smtA, cmoM; tRNA 5-carboxymethoxyuridine methyltransferase [EC:2.1.1.-]	0	0	0	0	0	0	0	0	0	0	0	0	0	0	0	0	0	0	0	0	0	0	0	0	0	1	0	0	0	0	0
K06222	Unclassified: metabolism	dkgB; 2,5-diketo-D-gluconate reductase B [EC:1.1.1.346]	1	1	1	1	0	1	1	1	1	0	1	1	1	1	0	1	1	1	1	1	1	1	1	1	1	1	1	1	1	1	1
K06223	Replication and repair	dam; DNA adenine methylase [EC:2.1.1.72]	0	0	0	0	2	0	0	0	1	0	0	0	0	0	0	0	1	0	0	1	0	0	1	2	2	1	0	0	0	3	1
K06284	Protein families: genetic information processing	abrB; AbrB family transcriptional regulator, transcriptional pleiotropic regulator of transition state genes	0	0	0	0	0	0	0	0	0	0	0	0	0	0	0	0	0	0	0	0	0	0	0	0	1	0	0	0	0	0	1
K06298	Unclassified: signaling and cellular processes	gerM; germination protein M	0	0	0	0	0	0	0	0	0	0	1	0	0	0	0	0	0	0	0	0	1	1	0	0	0	0	0	0	0	0	0
K06335	Unclassified: signaling and cellular processes	cotM; spore coat protein M	0	0	0	0	0	0	0	0	0	0	0	0	0	0	1	0	0	0	0	0	0	0	0	0	0	0	0	0	0	0	0
K06338	Unclassified: signaling and cellular processes	cotSA; spore coat protein SA	0	0	0	0	0	0	0	0	0	0	0	0	0	0	0	0	0	0	0	0	0	0	0	0	0	1	0	0	0	0	0
K06346	Unclassified: signaling and cellular processes	jag; spoIIIJ-associated protein	1	1	2	1	1	1	1	1	1	1	1	0	1	1	1	1	1	1	1	1	1	1	1	1	1	1	1	1	1	1	1
K06349	Unclassified: signaling and cellular processes	kbaA; KinB signaling pathway activation protein	0	0	0	0	0	0	0	1	0	0	0	0	0	0	0	0	0	0	0	0	0	0	0	0	0	0	0	0	0	0	0
K06379	Unclassified: metabolism	spoIIAB; stage II sporulation protein AB (anti-sigma F factor) [EC:2.7.11.1]	2	0	2	0	0	0	0	2	0	0	0	0	0	0	0	0	0	0	0	0	0	0	0	0	0	0	0	0	0	0	0
K06381	Unclassified: signaling and cellular processes	spoIID; stage II sporulation protein D	1	1	1	1	1	1	1	1	2	1	2	0	1	1	1	1	1	1	0	1	1	1	1	1	1	1	1	1	1	1	1
K06381	Unclassified: signaling and cellular processes	spoIID; stage II sporulation protein D	1	1	1	1	1	1	1	1	2	1	2	0	1	1	1	1	1	1	0	1	1	1	1	1	1	1	1	1	1	1	1
K06385	Unclassified: signaling and cellular processes	spoIIP; stage II sporulation protein P	0	0	0	0	0	0	0	0	0	0	0	0	0	0	0	0	0	0	0	0	0	0	0	0	0	0	0	0	0	1	0
K06399	Protein families: metabolism	spoIVB; stage IV sporulation protein B [EC:3.4.21.116]	0	0	0	0	0	1	0	0	0	0	0	1	0	0	0	0	0	0	0	0	0	0	0	0	0	0	0	0	0	0	0
K06399	Protein families: metabolism	spoIVB; stage IV sporulation protein B [EC:3.4.21.116]	0	0	0	0	0	1	0	0	0	0	0	1	0	0	0	0	0	0	0	0	0	0	0	0	0	0	0	0	0	0	0
K06400	Unclassified: signaling and cellular processes	spoIVCA; site-specific DNA recombinase	0	0	0	0	1	1	1	1	1	1	1	1	1	1	0	0	3	1	1	2	0	0	2	3	2	0	1	2	2	1	2
K06400	Unclassified: signaling and cellular processes	spoIVCA; site-specific DNA recombinase	0	0	0	0	1	1	1	1	1	1	1	1	1	1	0	0	3	1	1	2	0	0	2	3	2	0	1	2	2	1	2
K06416	Unclassified: signaling and cellular processes	spoVS; stage V sporulation protein S	2	2	2	2	2	2	2	2	2	2	2	2	2	2	3	2	3	2	2	2	2	2	2	2	2	2	2	2	2	2	2
K06438	Unclassified: signaling and cellular processes	yqfD; similar to stage IV sporulation protein	0	0	0	0	0	0	1	1	0	0	0	0	0	0	1	0	0	0	1	1	0	0	1	1	1	1	1	1	1	1	1
K06442	Protein families: genetic information processing	tlyA; 23S rRNA (cytidine1920-2'-O)/16S rRNA (cytidine1409-2'-O)-methyltransferase [EC:2.1.1.226 2.1.1.227]	1	1	1	1	1	1	1	1	1	1	1	1	1	1	1	1	1	1	0	1	1	1	1	1	1	1	0	1	1	1	1
K06595	Protein families: signaling and cellular processes	hemAT; heam-based aerotactic trancducer	0	0	0	1	0	0	0	0	0	0	0	0	0	0	0	0	0	0	0	0	0	0	0	0	0	0	0	0	0	0	0
K06596	Signal transduction	chpA; chemosensory pili system protein ChpA (sensor histidine kinase/response regulator)	1	0	1	0	0	0	0	0	0	0	0	0	0	0	0	0	0	0	0	0	0	0	0	0	0	0	0	0	0	0	0
K06600	Protein families: signaling and cellular processes	chpE; chemosensory pili system protein ChpE	1	1	1	1	1	1	1	1	1	1	1	1	1	1	1	0	0	0	0	1	1	1	1	1	2	1	1	1	1	1	1
K06603	Protein families: signaling and cellular processes	flaG; flagellar protein FlaG	1	0	2	1	2	0	1	1	1	1	1	0	0	0	0	1	1	1	0	1	1	1	0	0	0	0	0	0	0	0	0
K06606	Carbohydrate metabolism	iolI; 2-keto-myo-inositol isomerase [EC:5.3.99.11]	0	0	0	0	0	0	0	0	1	1	0	0	0	1	0	0	0	0	0	1	0	1	0	0	0	0	0	0	0	0	0
K06608	Protein families: genetic information processing	iolR; DeoR family transcriptional regulator, myo-inositol catabolism operon repressor	0	0	0	0	0	0	0	0	0	0	0	0	0	0	0	0	0	0	0	0	0	0	0	0	0	1	0	0	0	0	0
K06720	Amino acid metabolism	ectC; L-ectoine synthase [EC:4.2.1.108]	0	0	0	0	0	0	0	0	1	0	0	0	0	0	0	0	0	0	0	0	1	0	1	1	2	1	0	0	2	2	1
K06720	Amino acid metabolism	ectC; L-ectoine synthase [EC:4.2.1.108]	0	0	0	0	0	0	0	0	1	0	0	0	0	0	0	0	0	0	0	0	1	0	1	1	2	1	0	0	2	2	1
K06857	Membrane transport	tupC, vupC; tungstate transport system ATP-binding protein [EC:7.3.2.6]	0	0	0	0	0	0	0	0	0	0	0	0	0	0	0	0	0	0	0	0	0	0	0	0	2	0	0	0	0	0	0
K06859	Carbohydrate metabolism	pgi1; glucose-6-phosphate isomerase, archaeal [EC:5.3.1.9]	1	1	1	1	1	1	1	1	0	1	1	1	1	1	0	1	2	2	0	1	1	1	1	0	1	1	1	1	1	1	1
K06861	Membrane transport	lptB; lipopolysaccharide export system ATP-binding protein [EC:7.5.2.5]	1	1	1	1	1	1	1	1	1	1	1	1	1	1	1	1	1	1	0	1	1	1	1	1	1	1	1	1	1	1	1
K06864	Unclassified: metabolism	larE; pyridinium-3,5-biscarboxylic acid mononucleotide sulfurtransferase [EC:4.4.1.37]	3	3	3	2	3	3	3	2	3	3	3	3	3	3	2	4	3	3	2	3	3	3	2	2	2	2	2	2	1	2	2
K06864	Unclassified: metabolism	larE; pyridinium-3,5-biscarboxylic acid mononucleotide sulfurtransferase [EC:4.4.1.37]	3	3	3	2	3	3	3	2	3	3	3	3	3	3	2	4	3	3	2	3	3	3	2	2	2	2	2	2	1	2	2
K06871	Poorly characterized	K06871; uncharacterized protein	0	0	0	0	1	0	0	0	0	0	0	0	0	0	0	0	0	0	0	0	0	0	1	0	2	1	0	1	3	1	1
K06876	Poorly characterized	phrB; (6-4)DNA photolyase [EC:4.1.99.13]	0	0	0	0	0	0	0	1	0	0	0	0	0	0	0	0	0	0	0	0	0	0	0	1	0	0	0	0	0	0	0
K06878	Poorly characterized	K06878; tRNA-binding protein	1	1	1	1	1	1	1	2	1	1	1	1	1	1	2	1	2	1	1	1	2	2	1	1	1	1	1	1	1	1	1
K06881	Energy metabolism	nrnA; bifunctional oligoribonuclease and PAP phosphatase NrnA [EC:3.1.3.7 3.1.13.3]	2	2	2	2	2	2	2	2	2	2	2	2	3	2	2	2	2	2	1	2	2	2	2	3	2	2	2	2	2	3	2
K06881	Energy metabolism	nrnA; bifunctional oligoribonuclease and PAP phosphatase NrnA [EC:3.1.3.7 3.1.13.3]	2	2	2	2	2	2	2	2	2	2	2	2	3	2	2	2	2	2	1	2	2	2	2	3	2	2	2	2	2	3	2
K06883	Poorly characterized	K06883; uncharacterized protein	1	1	1	1	1	1	1	0	1	1	1	0	1	1	1	1	1	1	1	1	1	1	1	1	1	1	1	1	1	1	1
K06888	Poorly characterized	K06888; uncharacterized protein	0	0	0	0	0	1	1	0	0	0	0	0	0	0	0	0	0	0	0	0	0	0	1	0	1	1	0	1	0	0	1
K06889	Poorly characterized	K06889; uncharacterized protein	3	2	3	2	1	2	4	2	1	1	2	0	3	1	0	0	3	0	0	1	2	2	1	2	1	2	0	1	0	2	1
K06889	Poorly characterized	K06889; uncharacterized protein	3	2	3	2	1	2	4	2	1	1	2	0	3	1	0	0	3	0	0	1	2	2	1	2	1	2	0	1	0	2	1
K06894	Protein families: metabolism	yfhM; alpha-2-macroglobulin	1	1	0	4	1	1	1	1	1	1	1	1	1	1	1	1	1	1	1	1	1	1	1	2	2	1	1	1	1	1	1
K06895	Protein families: signaling and cellular processes	lysE, argO; L-lysine exporter family protein LysE/ArgO	1	1	1	1	1	1	1	1	1	1	1	1	1	1	1	0	0	0	0	1	1	1	1	1	2	1	1	1	1	1	1
K06897	Metabolism of cofactors and vitamins	K06897; 7,8-dihydropterin-6-yl-methyl-4-(beta-D-ribofuranosyl)aminobenzene 5'-phosphate synthase [EC:2.5.1.105]	1	0	1	1	0	0	2	0	1	1	1	0	1	1	0	1	1	1	0	1	1	1	1	2	1	3	0	1	1	1	1
K06897	Metabolism of cofactors and vitamins	K06897; 7,8-dihydropterin-6-yl-methyl-4-(beta-D-ribofuranosyl)aminobenzene 5'-phosphate synthase [EC:2.5.1.105]	1	0	1	1	0	0	2	0	1	1	1	0	1	1	0	1	1	1	0	1	1	1	1	2	1	3	0	1	1	1	1
K06898	Unclassified: metabolism	larB; pyridinium-3,5-biscarboxylic acid mononucleotide synthase [EC:2.5.1.143]	2	2	5	2	2	2	2	0	2	2	2	1	1	2	2	2	3	2	2	2	2	2	2	3	2	2	2	2	2	2	2
K06901	Protein families: signaling and cellular processes	pbuG, azgA, ghxP, ghxQ, adeQ; adenine/guanine/hypoxanthine permease	1	1	1	1	1	1	0	0	0	0	1	0	1	0	0	0	0	0	0	0	0	0	0	0	0	0	0	0	0	0	0
K06902	Transport and catabolism	UMF1; MFS transporter, UMF1 family	0	0	0	0	0	0	0	0	0	0	0	0	0	0	0	0	0	0	0	0	0	0	0	0	0	0	0	0	0	2	0
K06904	Poorly characterized	K06904; uncharacterized protein	0	0	0	0	0	0	0	0	0	0	0	0	0	0	0	0	0	0	0	0	1	0	0	0	0	0	0	0	0	0	1
K06909	Unclassified: genetic information processing	xtmB; phage terminase large subunit	0	0	0	0	0	0	0	0	0	0	0	0	0	0	0	0	2	0	0	0	1	0	1	0	0	0	0	0	0	0	1
K06910	Protein families: metabolism	PEBP, TFS1; phosphatidylethanolamine-binding protein	0	0	0	0	0	0	0	1	0	0	0	0	0	0	0	0	0	0	0	0	1	1	1	1	2	1	1	1	1	2	1
K06915	Poorly characterized	herA; DNA double-strand break repair helicase HerA and related ATPase	1	1	1	2	1	1	1	1	1	1	1	1	1	1	1	1	2	1	2	1	1	1	0	0	0	1	0	0	0	0	0
K06915	Poorly characterized	herA; DNA double-strand break repair helicase HerA and related ATPase	1	1	1	2	1	1	1	1	1	1	1	1	1	1	1	1	2	1	2	1	1	1	0	0	0	1	0	0	0	0	0
K06919	Unclassified: genetic information processing	K06919; putative DNA primase/helicase	0	3	0	1	0	0	0	0	0	0	0	0	0	0	0	0	7	1	1	3	1	0	0	0	0	1	0	0	0	0	0
K06921	Poorly characterized	K06921; uncharacterized protein	1	1	2	1	1	1	0	0	0	0	0	0	0	0	0	0	0	0	0	0	1	1	0	0	0	0	0	0	0	0	0
K06922	Poorly characterized	K06922; uncharacterized protein	0	1	3	3	1	0	0	2	0	0	1	0	1	0	1	1	0	0	0	0	1	1	0	1	1	0	0	0	0	1	0
K06922	Poorly characterized	K06922; uncharacterized protein	0	1	3	3	1	0	0	2	0	0	1	0	1	0	1	1	0	0	0	0	1	1	0	1	1	0	0	0	0	1	0
K06925	Protein families: genetic information processing	tsaE; tRNA threonylcarbamoyladenosine biosynthesis protein TsaE	1	1	1	1	1	1	2	1	2	2	1	0	1	2	1	1	2	2	2	2	1	2	2	1	2	1	1	2	2	2	2
K06925	Protein families: genetic information processing	tsaE; tRNA threonylcarbamoyladenosine biosynthesis protein TsaE	1	1	1	1	1	1	2	1	2	2	1	0	1	2	1	1	2	2	2	2	1	2	2	1	2	1	1	2	2	2	2
K06926	Poorly characterized	K06926; uncharacterized protein	0	0	0	0	0	0	0	0	0	0	0	0	0	0	0	0	0	0	0	0	0	0	0	0	1	0	0	0	0	0	0
K06927	Protein families: genetic information processing	DPH6; diphthine-ammonia ligase [EC:6.3.1.14]	1	1	1	1	1	1	1	2	0	0	1	0	1	0	0	0	0	0	1	0	1	1	0	0	0	0	0	0	0	0	0
K06928	Nucleotide metabolism	NTPCR; nucleoside-triphosphatase [EC:3.6.1.15]	1	1	1	1	1	1	1	1	1	1	1	0	1	1	0	1	1	1	0	1	1	1	0	0	0	0	0	0	0	0	0
K06933	Poorly characterized	K06933; uncharacterized protein	1	1	1	1	0	0	0	0	0	0	0	0	0	0	0	0	0	0	0	0	0	0	0	0	0	0	0	0	0	0	0
K06934	Poorly characterized	K06934; uncharacterized protein	1	1	2	1	1	1	0	1	0	0	1	0	1	0	1	0	0	0	0	0	1	1	0	0	0	0	0	0	0	0	0
K06941	Protein families: genetic information processing	rlmN; 23S rRNA (adenine2503-C2)-methyltransferase [EC:2.1.1.192]	1	1	1	1	2	1	2	1	2	2	1	1	2	2	1	2	2	2	0	2	2	2	2	2	1	2	0	2	1	1	1
K06942	Protein families: genetic information processing	ychF; ribosome-binding ATPase	1	1	1	1	1	1	1	1	1	1	1	1	1	1	1	1	1	1	0	1	1	1	1	1	1	1	0	1	1	1	1
K06944	Poorly characterized	DRG, RBG; developmentally-regulated GTP-binding protein [EC:3.6.5.-]	1	1	1	2	1	1	1	1	1	2	1	0	1	1	0	1	1	0	1	1	1	1	0	0	0	0	0	0	0	0	0
K06947	Protein families: genetic information processing	GRC3, NOL9; polynucleotide 5'-hydroxyl-kinase GRC3/NOL9 [EC:2.7.1.-]	1	1	1	1	1	1	1	1	1	1	1	1	0	1	1	1	1	0	1	1	1	1	0	0	0	0	0	0	0	0	0
K06950	Poorly characterized	K06950; uncharacterized protein	2	1	1	1	1	1	1	1	1	1	1	0	0	1	1	1	1	1	1	1	2	2	1	1	1	1	2	1	1	1	1
K06950	Poorly characterized	K06950; uncharacterized protein	2	1	1	1	1	1	1	1	1	1	1	0	0	1	1	1	1	1	1	1	2	2	1	1	1	1	2	1	1	1	1
K06951	Poorly characterized	K06951; uncharacterized protein	1	1	1	1	1	1	1	1	1	1	1	1	1	1	1	1	1	1	1	1	1	1	1	1	1	1	2	1	1	1	1
K06952	Poorly characterized	yfdR; 5'-nucleotidase [EC:3.1.3.89]	0	0	0	0	0	0	1	0	0	0	0	0	0	0	0	0	0	0	0	0	0	0	1	1	1	1	0	1	0	1	1
K06959	Unclassified: genetic information processing	tex; protein Tex	0	0	0	0	0	0	0	0	0	0	0	0	0	0	0	0	0	0	0	0	0	0	1	1	3	1	0	1	1	1	1
K06960	Poorly characterized	K06960; uncharacterized protein	1	1	1	1	1	1	1	1	1	1	1	1	1	1	1	1	1	1	1	1	1	1	1	1	1	1	1	1	1	1	1
K06966	Nucleotide metabolism	ppnN; pyrimidine/purine-5'-nucleotide nucleosidase [EC:3.2.2.10 3.2.2.-]	1	1	1	1	1	1	1	1	1	1	1	2	1	1	1	1	1	2	1	1	1	1	0	0	0	0	0	0	0	0	0
K06967	Protein families: genetic information processing	trmK; tRNA (adenine22-N1)-methyltransferase [EC:2.1.1.217]	0	0	0	0	0	0	1	0	0	0	0	0	0	0	0	0	0	0	0	0	0	0	0	0	0	0	0	0	0	0	0
K06969	Protein families: genetic information processing	rlmI; 23S rRNA (cytosine1962-C5)-methyltransferase [EC:2.1.1.191]	1	1	1	1	1	1	1	1	0	0	1	0	1	0	0	0	0	0	0	0	0	0	0	0	0	0	0	0	0	0	0
K06971	Poorly characterized	K06971; uncharacterized protein	0	0	0	0	0	0	1	0	1	1	0	0	0	1	0	0	0	0	1	1	0	0	1	1	1	1	0	1	1	1	1
K06973	Poorly characterized	K06973; uncharacterized protein	1	1	2	1	1	1	1	1	1	1	1	1	1	1	2	1	2	1	1	1	1	1	1	2	1	1	1	1	1	1	1
K06987	Poorly characterized	K06987; uncharacterized protein	0	0	0	0	0	0	0	0	0	0	0	0	0	0	0	0	0	0	0	0	0	0	0	0	0	0	0	0	0	1	0
K06988	Unclassified: metabolism	fno; 8-hydroxy-5-deazaflavin:NADPH oxidoreductase [EC:1.5.1.40]	0	0	0	1	0	1	1	0	0	0	0	0	0	0	0	0	0	0	0	0	0	0	0	0	0	0	0	0	0	0	0
K06990	Protein families: signaling and cellular processes	MEMO1; MEMO1 family protein	2	2	2	2	2	2	2	2	3	3	2	2	2	3	2	3	3	3	1	4	2	2	2	2	2	2	2	2	2	2	2
K06990	Protein families: signaling and cellular processes	MEMO1; MEMO1 family protein	2	2	2	2	2	2	2	2	3	3	2	2	2	3	2	3	3	3	1	4	2	2	2	2	2	2	2	2	2	2	2
K06993	Unclassified: genetic information processing	K06993; ribonuclease H-related protein	0	0	0	0	0	0	0	0	0	0	0	0	0	0	0	0	0	0	0	0	0	0	1	3	1	1	1	1	1	1	1
K06994	Poorly characterized	K06994; putative drug exporter of the RND superfamily	0	0	0	0	0	0	0	0	0	0	0	0	0	0	0	0	0	0	0	0	0	0	0	0	0	1	0	0	0	0	0
K06997	Unclassified: metabolism	yggS, PROSC; PLP dependent protein	1	1	1	1	1	1	1	1	1	1	1	1	1	1	1	1	1	1	1	1	1	1	1	1	1	1	1	1	1	1	1
K07003	Poorly characterized	K07003; uncharacterized protein	1	1	1	1	1	1	1	2	1	1	1	2	0	1	0	1	1	1	0	1	1	1	1	1	1	1	0	2	1	0	1
K07004	Poorly characterized	K07004; uncharacterized protein	0	0	0	0	0	0	0	0	0	0	1	0	0	0	0	1	0	0	0	0	0	0	0	0	0	0	0	0	0	0	0
K07005	Poorly characterized	K07005; uncharacterized protein	0	0	0	0	0	0	0	1	0	0	0	0	0	0	0	0	0	0	0	0	0	0	1	1	1	1	0	1	1	1	1
K07011	#N/A	#N/A	0	0	0	0	1	1	0	1	0	1	1	1	1	0	0	0	1	2	2	0	2	2	2	2	5	2	1	1	2	1	1
K07011	#N/A	#N/A	0	0	0	0	1	1	0	1	0	1	1	1	1	0	0	0	1	2	2	0	2	2	2	2	5	2	1	1	2	1	1
K07012	Protein families: signaling and cellular processes	cas3; CRISPR-associated endonuclease/helicase Cas3 [EC:3.1.-.- 5.6.2.4]	4	4	1	3	2	2	5	3	0	4	2	0	1	1	0	1	1	0	2	1	2	2	1	3	4	3	0	1	3	2	2
K07012	Protein families: signaling and cellular processes	cas3; CRISPR-associated endonuclease/helicase Cas3 [EC:3.1.-.- 5.6.2.4]	4	4	1	3	2	2	5	3	0	4	2	0	1	1	0	1	1	0	2	1	2	2	1	3	4	3	0	1	3	2	2
K07015	Unclassified: metabolism	yqeG; putative phosphatase [EC:3.1.3.-]	1	1	1	1	1	1	1	1	1	1	1	1	1	1	1	1	1	1	0	1	1	1	1	1	1	1	0	1	1	1	1
K07016	Protein families: signaling and cellular processes	csm1, cas10; CRISPR-associated protein Csm1	0	2	2	1	1	0	3	1	3	3	0	1	1	0	0	2	2	1	1	2	1	1	0	3	0	1	0	0	0	0	0
K07016	Protein families: signaling and cellular processes	csm1, cas10; CRISPR-associated protein Csm1	0	2	2	1	1	0	3	1	3	3	0	1	1	0	0	2	2	1	1	2	1	1	0	3	0	1	0	0	0	0	0
K07023	Poorly characterized	YGK1, HDDC2; 5'-deoxynucleotidase [EC:3.1.3.89]	0	0	0	1	0	0	1	0	1	1	0	1	0	1	1	1	1	1	0	1	1	1	2	1	2	3	1	2	1	2	3
K07023	Poorly characterized	YGK1, HDDC2; 5'-deoxynucleotidase [EC:3.1.3.89]	0	0	0	1	0	0	1	0	1	1	0	1	0	1	1	1	1	1	0	1	1	1	2	1	2	3	1	2	1	2	3
K07025	Poorly characterized	K07025; putative hydrolase of the HAD superfamily	0	0	1	0	0	0	0	1	0	0	0	0	0	0	0	0	0	0	0	0	0	0	1	1	1	1	0	1	1	1	2
K07025	Poorly characterized	K07025; putative hydrolase of the HAD superfamily	0	0	1	0	0	0	0	1	0	0	0	0	0	0	0	0	0	0	0	0	0	0	1	1	1	1	0	1	1	1	2
K07027	Unclassified: metabolism	K07027; glycosyltransferase 2 family protein	2	2	2	2	2	2	2	2	1	1	2	0	2	1	1	1	1	1	0	1	1	2	3	3	2	3	2	3	3	3	3
K07032	Poorly characterized	K07032; uncharacterized protein	0	0	0	0	0	0	0	0	0	0	0	0	0	0	0	0	0	0	0	0	1	1	1	1	2	1	1	1	1	2	1
K07033	Poorly characterized	K07033; uncharacterized protein	1	1	2	1	1	1	1	1	1	1	1	1	1	1	1	1	1	1	1	1	1	1	1	1	1	1	0	1	1	1	2
K07037	Unclassified: metabolism	pgpH; cyclic-di-AMP phosphodiesterase PgpH [EC:3.1.4.-]	1	1	1	1	1	1	1	1	1	1	1	0	1	1	1	1	1	1	1	1	1	1	1	1	1	1	1	1	2	1	1
K07040	Poorly characterized	yceD, ylbN; DUF177 domain-containing protein	1	1	1	1	1	1	1	1	1	1	1	1	1	1	1	1	1	1	1	1	1	1	1	0	1	1	1	1	1	1	1
K07041	Poorly characterized	K07041; uncharacterized protein	0	0	0	0	0	0	0	0	0	0	0	0	0	0	0	0	0	0	0	0	0	0	0	1	0	1	0	0	0	0	0
K07042	Protein families: genetic information processing	ybeY, yqfG; probable rRNA maturation factor	1	1	1	1	1	1	1	0	1	1	1	0	1	1	1	1	1	1	1	1	1	1	1	1	1	1	1	1	1	1	1
K07043	Unclassified: metabolism	upp; UTP pyrophosphatase [EC:3.6.1.-]	0	0	1	0	0	0	0	0	2	1	0	2	0	2	0	1	3	2	1	2	0	0	1	2	2	1	0	1	1	1	1
K07045	Poorly characterized	K07045; uncharacterized protein	0	0	0	0	0	0	0	1	3	1	1	1	0	1	2	1	1	3	0	1	0	1	2	5	5	4	2	3	3	1	2
K07045	Poorly characterized	K07045; uncharacterized protein	0	0	0	0	0	0	0	1	3	1	1	1	0	1	2	1	1	3	0	1	0	1	2	5	5	4	2	3	3	1	2
K07048	Poorly characterized	PTER, php; phosphotriesterase-related protein	0	0	0	0	0	0	0	0	0	0	0	0	0	0	1	0	0	0	0	0	0	0	1	2	1	1	1	1	1	1	1
K07052	Poorly characterized	K07052; CAAX protease family protein	0	0	0	0	0	0	2	1	0	0	0	0	0	0	0	0	0	0	0	0	1	1	0	1	2	1	1	2	1	1	1
K07052	Poorly characterized	K07052; CAAX protease family protein	0	0	0	0	0	0	2	1	0	0	0	0	0	0	0	0	0	0	0	0	1	1	0	1	2	1	1	2	1	1	1
K07053	Unclassified: metabolism	E3.1.3.97; 3',5'-nucleoside bisphosphate phosphatase [EC:3.1.3.97]	2	2	2	2	2	2	2	1	1	1	2	2	2	1	1	1	1	1	1	1	1	1	2	3	3	2	2	3	2	2	2
K07053	Unclassified: metabolism	E3.1.3.97; 3',5'-nucleoside bisphosphate phosphatase [EC:3.1.3.97]	2	2	2	2	2	2	2	1	1	1	2	2	2	1	1	1	1	1	1	1	1	1	2	3	3	2	2	3	2	2	2
K07054	Poorly characterized	K07054; uncharacterized protein	0	0	0	0	0	0	0	0	0	0	0	0	0	0	0	0	0	0	0	0	0	0	1	0	1	1	0	1	1	1	1
K07056	Protein families: genetic information processing	rsmI; 16S rRNA (cytidine1402-2'-O)-methyltransferase [EC:2.1.1.198]	1	1	2	1	1	1	1	1	1	1	1	1	1	1	1	1	1	1	1	1	1	1	1	1	1	1	1	1	1	1	1
K07057	Unclassified: metabolism	bpsA; N4-bis(aminopropyl)spermidine synthase [EC:2.5.1.128]	1	1	1	1	1	1	2	2	1	1	1	1	1	0	1	1	1	2	1	1	1	1	0	0	0	0	0	0	0	0	0
K07057	Unclassified: metabolism	bpsA; N4-bis(aminopropyl)spermidine synthase [EC:2.5.1.128]	1	1	1	1	1	1	2	2	1	1	1	1	1	0	1	1	1	2	1	1	1	1	0	0	0	0	0	0	0	0	0
K07058	Poorly characterized	K07058; membrane protein	0	0	0	0	0	0	0	0	0	0	0	0	0	0	0	0	0	1	0	0	0	0	0	0	0	0	0	0	0	0	0
K07059	Poorly characterized	K07059; uncharacterized protein	1	1	1	1	1	1	1	1	1	1	1	0	1	1	1	1	1	1	1	1	1	1	1	1	1	1	1	1	1	1	1
K07061	Protein families: signaling and cellular processes	cmr1; CRISPR-associated protein Cmr1	0	2	2	1	0	0	1	1	2	1	0	1	0	0	0	1	1	0	0	1	1	1	1	1	1	2	0	0	0	0	0
K07063	Poorly characterized	K07063; uncharacterized protein	0	0	0	0	0	0	0	0	0	1	0	0	0	0	0	0	1	0	0	0	0	0	0	0	0	0	0	0	0	0	0
K07064	Poorly characterized	K07064; uncharacterized protein	0	0	0	0	0	0	0	0	1	1	0	0	0	0	0	0	0	0	0	0	0	0	0	2	1	2	0	0	0	0	1
K07065	Poorly characterized	K07065; uncharacterized protein	0	1	0	0	0	0	0	0	0	0	0	0	0	0	0	2	1	2	0	0	0	0	0	2	1	1	0	1	0	0	0
K07066	Poorly characterized	K07066; uncharacterized protein	0	0	0	0	0	0	0	0	1	1	0	0	0	0	0	0	1	1	0	0	0	0	0	0	0	1	0	0	0	0	0
K07075	Poorly characterized	K07075; uncharacterized protein	5	7	9	9	1	2	4	6	2	0	4	1	6	0	3	2	0	7	0	0	7	12	1	2	4	2	2	1	1	1	3
K07075	Poorly characterized	K07075; uncharacterized protein	5	7	9	9	1	2	4	6	2	0	4	1	6	0	3	2	0	7	0	0	7	12	1	2	4	2	2	1	1	1	3
K07076	Poorly characterized	K07076; uncharacterized protein	1	6	3	5	0	0	6	10	4	3	10	0	3	3	3	1	2	9	1	1	16	14	0	2	2	2	2	0	1	0	0
K07076	Poorly characterized	K07076; uncharacterized protein	1	6	3	5	0	0	6	10	4	3	10	0	3	3	3	1	2	9	1	1	16	14	0	2	2	2	2	0	1	0	0
K07079	Poorly characterized	K07079; uncharacterized protein	1	1	1	1	1	1	1	0	3	2	1	0	1	3	2	2	1	1	2	2	1	1	1	2	3	2	1	1	2	2	2
K07082	Poorly characterized	K07082; UPF0755 protein	1	1	1	1	1	1	1	2	1	1	1	1	1	1	1	1	1	1	0	1	1	1	1	1	1	1	0	1	1	1	1
K07085	Unclassified: signaling and cellular processes	K07085; putative transport protein	0	0	0	0	0	0	0	0	0	0	0	0	1	0	0	0	0	0	0	0	0	0	0	0	0	0	0	0	0	0	0
K07088	#N/A	#N/A	2	2	2	2	2	2	1	1	1	1	2	0	1	1	1	1	1	1	1	1	2	2	1	1	1	1	1	1	1	1	1
K07089	Poorly characterized	K07089; uncharacterized protein	2	2	2	2	1	3	2	1	0	0	2	2	2	0	0	0	0	0	1	0	1	1	1	1	2	1	0	0	0	0	2
K07090	Poorly characterized	K07090; uncharacterized protein	0	0	0	0	0	0	0	0	0	0	0	1	0	0	0	0	0	0	0	0	0	0	0	0	0	0	0	0	0	0	0
K07091	Membrane transport	lptF; lipopolysaccharide export system permease protein	2	2	2	2	2	3	3	2	2	2	2	2	2	2	2	2	3	2	3	2	2	2	2	2	2	2	3	2	3	2	3
K07091	Membrane transport	lptF; lipopolysaccharide export system permease protein	2	2	2	2	2	3	3	2	2	2	2	2	2	2	2	2	3	2	3	2	2	2	2	2	2	2	3	2	3	2	3
K07093	Poorly characterized	K07093; uncharacterized protein	0	0	0	0	0	0	0	0	0	0	0	0	0	0	0	0	0	0	0	0	1	1	0	0	0	0	0	0	0	0	0
K07095	Poorly characterized	K07095; uncharacterized protein	2	3	2	2	2	2	2	2	2	2	2	2	2	2	2	2	2	1	1	2	2	2	2	2	2	2	1	2	2	2	2
K07098	Poorly characterized	K07098; uncharacterized protein	0	0	0	0	1	0	0	0	1	2	0	0	0	1	1	1	1	1	0	1	0	0	1	0	0	0	1	1	1	1	1
K07098	Poorly characterized	K07098; uncharacterized protein	0	0	0	0	1	0	0	0	1	2	0	0	0	1	1	1	1	1	0	1	0	0	1	0	0	0	1	1	1	1	1
K07100	Poorly characterized	K07100; putative phosphoribosyl transferase	0	0	0	0	0	0	1	0	0	0	0	0	0	0	0	0	0	0	0	0	0	0	0	0	0	0	0	0	0	0	0
K07102	Carbohydrate metabolism	amgK; N-acetylmuramate 1-kinase [EC:2.7.1.221]	1	1	1	1	1	1	1	1	1	1	1	0	1	1	1	1	1	1	1	1	1	1	1	1	1	1	1	1	1	1	1
K07109	Poorly characterized	K07109; uncharacterized protein	1	1	2	1	1	0	1	1	0	0	0	0	0	0	0	0	0	0	0	0	0	0	0	1	0	1	0	0	0	0	0
K07110	Protein families: genetic information processing	ramB; XRE family transcriptional regulator, fatty acid utilization regulator	0	0	0	0	0	0	0	0	0	0	0	0	0	0	0	1	0	0	0	0	0	0	0	0	0	0	0	0	0	0	0
K07114	Protein families: signaling and cellular processes	yfbK; Ca-activated chloride channel homolog	1	2	0	1	1	1	1	1	1	1	1	0	1	1	0	1	1	1	1	1	1	0	1	0	2	1	1	1	1	1	1
K07118	Poorly characterized	K07118; uncharacterized protein	0	0	0	0	0	0	0	0	1	1	0	0	0	1	0	1	1	1	0	1	0	0	0	0	0	0	0	0	0	0	0
K07123	Poorly characterized	K07123; uncharacterized protein	0	0	0	0	0	0	0	2	0	0	0	0	0	0	0	0	0	0	0	0	0	0	0	0	0	0	1	0	0	0	0
K07124	Poorly characterized	K07124; uncharacterized protein	0	0	0	0	1	1	0	1	0	0	1	0	0	0	0	0	0	0	0	0	0	0	0	0	0	0	0	0	0	0	0
K07126	Poorly characterized	K07126; uncharacterized protein	0	0	0	0	0	0	0	0	0	0	0	0	0	0	0	0	0	0	0	0	0	0	1	1	1	1	1	1	1	1	1
K07130	Carbohydrate metabolism	kynB; arylformamidase [EC:3.5.1.9]	2	2	2	2	2	3	3	3	2	2	2	1	2	2	2	2	2	2	2	2	2	2	3	3	3	4	3	3	2	3	2
K07130	Carbohydrate metabolism	kynB; arylformamidase [EC:3.5.1.9]	2	2	2	2	2	3	3	3	2	2	2	1	2	2	2	2	2	2	2	2	2	2	3	3	3	4	3	3	2	3	2
K07133	Poorly characterized	K07133; uncharacterized protein	0	2	1	1	0	0	1	2	0	0	3	0	1	0	0	1	0	0	0	0	2	3	0	0	0	0	0	0	1	0	0
K07137	Poorly characterized	K07137; uncharacterized protein	1	1	1	1	1	1	1	1	1	1	1	1	1	1	1	1	1	1	1	1	1	1	1	1	2	1	1	1	1	2	1
K07138	Poorly characterized	K07138; uncharacterized protein	1	1	2	1	1	1	2	1	1	1	2	1	0	1	1	1	2	1	0	1	1	1	1	1	1	1	1	1	1	1	1
K07139	Poorly characterized	K07139; uncharacterized protein	0	0	0	0	0	0	0	0	0	0	0	0	0	0	0	0	0	0	0	0	0	0	0	0	0	0	0	0	0	1	0
K07147	Unclassified: metabolism	msrP; methionine sulfoxide reductase catalytic subunit [EC:1.8.-.-]	1	1	1	1	0	1	1	1	0	0	0	0	1	0	0	0	0	0	0	0	0	0	1	1	0	0	0	0	0	1	0
K07150	Poorly characterized	K07150; uncharacterized protein	1	1	1	1	1	1	0	0	1	1	1	0	0	1	1	1	1	1	1	1	0	0	0	0	0	0	0	0	0	0	0
K07151	Glycan biosynthesis and metabolism	STT3; dolichyl-diphosphooligosaccharide---protein glycosyltransferase [EC:2.4.99.18]	0	0	0	0	0	0	0	0	0	0	0	0	0	0	0	0	0	0	0	0	0	0	1	1	1	0	0	1	1	0	1
K07159	Poorly characterized	K07159; uncharacterized protein	1	1	1	1	1	1	1	0	1	1	1	1	0	1	1	1	1	1	0	1	1	1	1	1	1	1	0	1	1	1	1
K07161	Poorly characterized	K07161; uncharacterized protein	1	0	0	1	0	0	0	0	0	0	0	0	0	0	0	0	0	0	0	0	0	0	0	0	0	0	0	0	0	0	0
K07164	Poorly characterized	K07164; uncharacterized protein	1	0	1	0	1	0	1	0	0	0	1	1	0	0	0	1	0	0	1	0	0	0	1	1	1	1	0	1	1	1	1
K07166	Unclassified: signaling and cellular processes	K07166; ACT domain-containing protein	1	1	1	1	1	1	1	1	1	1	1	1	1	1	1	1	1	1	0	1	1	1	1	1	1	1	0	1	1	1	1
K07168	Unclassified: signaling and cellular processes	K07168; CBS domain-containing membrane protein	0	0	0	0	0	0	0	0	0	0	0	0	0	0	0	0	0	0	0	0	0	0	0	0	0	1	0	0	0	0	0
K07171	Protein families: signaling and cellular processes	mazF, ndoA, chpA; mRNA interferase MazF [EC:3.1.-.-]	0	0	0	1	0	0	0	1	3	0	0	0	1	0	3	2	0	6	0	1	0	0	0	1	0	2	0	0	0	0	0
K07172	Protein families: signaling and cellular processes	mazE, chpAI; antitoxin MazE	1	1	1	1	0	0	0	0	0	0	0	0	1	0	0	0	0	0	0	0	0	0	0	0	0	0	0	0	0	0	0
K07182	Unclassified: signaling and cellular processes	K07182; CBS domain-containing protein	0	0	0	0	1	0	1	0	0	0	0	0	0	0	0	0	0	0	0	0	0	0	0	0	0	0	0	0	0	0	0
K07213	Digestive system	ATOX1, ATX1, copZ, golB; copper chaperone	0	0	1	0	0	0	0	0	0	0	0	0	0	0	0	0	0	0	0	0	0	0	0	0	0	0	1	0	0	0	0
K07213	Digestive system	ATOX1, ATX1, copZ, golB; copper chaperone	0	0	1	0	0	0	0	0	0	0	0	0	0	0	0	0	0	0	0	0	0	0	0	0	0	0	1	0	0	0	0
K07216	Unclassified: signaling and cellular processes	hr; hemerythrin	2	2	2	1	2	1	2	0	0	0	0	0	2	0	0	0	0	0	1	0	0	0	0	0	0	0	0	1	0	0	0
K07216	Unclassified: signaling and cellular processes	hr; hemerythrin	2	2	2	1	2	1	2	0	0	0	0	0	2	0	0	0	0	0	1	0	0	0	0	0	0	0	0	1	0	0	0
K07234	Unclassified: signaling and cellular processes	K07234; uncharacterized protein involved in response to NO	1	0	0	0	0	0	0	0	0	0	0	0	0	0	0	0	0	0	0	0	0	0	0	0	0	0	0	0	0	0	0
K07238	Protein families: signaling and cellular processes	TC.ZIP, zupT, ZRT3, ZIP2; zinc transporter, ZIP family	1	1	1	2	1	1	1	1	1	1	1	1	1	1	1	1	2	1	0	1	1	1	1	2	1	1	0	1	1	1	1
K07240	Protein families: signaling and cellular processes	chrA; chromate transporter	2	2	1	2	2	2	2	3	2	3	1	2	2	0	0	2	1	2	2	4	2	2	2	2	2	6	2	2	4	2	2
K07242	Unclassified: signaling and cellular processes	K07242; putative multicomponent Na+:H+ antiporter subunit B	0	1	1	0	0	0	0	0	0	0	0	0	0	0	0	0	0	0	0	0	0	0	0	0	0	0	0	0	0	0	0
K07259	Glycan biosynthesis and metabolism	dacB; serine-type D-Ala-D-Ala carboxypeptidase/endopeptidase (penicillin-binding protein 4) [EC:3.4.16.4 3.4.21.-]	0	0	0	0	0	0	0	0	0	0	0	0	0	0	0	0	0	0	0	0	0	0	0	0	0	0	1	0	0	0	0
K07263	Protein families: metabolism	pqqL; zinc protease [EC:3.4.24.-]	2	2	3	0	2	2	2	1	2	2	1	2	2	2	1	2	2	2	2	2	2	2	2	4	2	2	2	2	2	2	2
K07265	Unclassified: signaling and cellular processes	kpsS, lipB; capsular polysaccharide export protein	0	0	0	0	0	0	0	0	0	0	0	0	0	0	0	0	0	0	0	0	0	0	0	1	0	0	0	0	0	0	0
K07277	Protein families: genetic information processing	SAM50, TOB55, bamA; outer membrane protein insertion porin family	1	1	1	1	3	2	3	1	2	2	1	1	1	2	3	2	2	2	1	2	3	2	2	2	2	2	2	2	2	3	2
K07277	Protein families: genetic information processing	SAM50, TOB55, bamA; outer membrane protein insertion porin family	1	1	1	1	3	2	3	1	2	2	1	1	1	2	3	2	2	2	1	2	3	2	2	2	2	2	2	2	2	3	2
K07278	Protein families: signaling and cellular processes	tamA; translocation and assembly module TamA	0	0	0	0	0	0	0	0	0	0	0	0	0	0	0	0	0	0	0	0	0	0	0	0	0	0	0	0	0	1	0
K07281	Carbohydrate metabolism	ipct; 1L-myo-inositol 1-phosphate cytidylyltransferase [EC:2.7.7.74]	0	0	0	0	0	0	0	1	0	0	0	0	0	0	0	0	0	0	0	0	0	0	0	0	0	0	0	0	0	0	0
K07282	Unclassified: signaling and cellular processes	capA, pgsA; gamma-polyglutamate biosynthesis protein CapA	0	0	0	0	0	0	0	0	1	1	0	0	0	1	0	1	1	1	1	2	0	0	1	1	1	1	1	1	1	1	1
K07282	Unclassified: signaling and cellular processes	capA, pgsA; gamma-polyglutamate biosynthesis protein CapA	0	0	0	0	0	0	0	0	1	1	0	0	0	1	0	1	1	1	1	2	0	0	1	1	1	1	1	1	1	1	1
K07284	Protein families: metabolism	srtA; sortase A [EC:3.4.22.70]	0	0	0	0	0	0	0	0	0	0	0	0	0	0	0	0	0	0	0	0	0	0	0	0	0	0	0	0	0	1	0
K07301	Protein families: signaling and cellular processes	yrbG; cation:H+ antiporter	0	0	0	0	0	0	0	0	0	0	0	0	0	0	0	0	0	0	0	0	0	0	0	1	0	0	0	0	0	1	0
K07304	Unclassified: metabolism	msrA; peptide-methionine (S)-S-oxide reductase [EC:1.8.4.11]	1	1	1	1	1	1	1	0	1	1	0	0	1	1	0	1	1	1	0	1	1	1	1	1	1	1	0	1	1	1	1
K07305	Unclassified: metabolism	msrB; peptide-methionine (R)-S-oxide reductase [EC:1.8.4.12]	1	1	1	1	1	1	1	0	1	1	0	0	1	1	0	1	1	1	0	1	1	1	1	1	1	1	0	1	1	1	1
K07315	Protein families: genetic information processing	rsbU_P; phosphoserine phosphatase RsbU/P [EC:3.1.3.3]	3	3	3	1	2	2	2	4	1	2	1	0	2	2	1	3	1	2	0	1	4	2	3	3	7	4	2	4	5	5	4
K07315	Protein families: genetic information processing	rsbU_P; phosphoserine phosphatase RsbU/P [EC:3.1.3.3]	3	3	3	1	2	2	2	4	1	2	1	0	2	2	1	3	1	2	0	1	4	2	3	3	7	4	2	4	5	5	4
K07316	Protein families: signaling and cellular processes	mod; adenine-specific DNA-methyltransferase [EC:2.1.1.72]	0	0	0	0	0	0	0	0	1	3	1	0	0	0	0	0	1	0	0	1	0	0	0	1	0	1	1	0	1	3	0
K07316	Protein families: signaling and cellular processes	mod; adenine-specific DNA-methyltransferase [EC:2.1.1.72]	0	0	0	0	0	0	0	0	1	3	1	0	0	0	0	0	1	0	0	1	0	0	0	1	0	1	1	0	1	3	0
K07317	Protein families: signaling and cellular processes	K07317; adenine-specific DNA-methyltransferase [EC:2.1.1.72]	0	0	0	0	0	0	0	0	0	0	0	0	0	0	0	0	0	1	0	0	1	0	0	1	1	2	0	0	0	2	0
K07317	Protein families: signaling and cellular processes	K07317; adenine-specific DNA-methyltransferase [EC:2.1.1.72]	0	0	0	0	0	0	0	0	0	0	0	0	0	0	0	0	0	1	0	0	1	0	0	1	1	2	0	0	0	2	0
K07319	Protein families: signaling and cellular processes	yhdJ; adenine-specific DNA-methyltransferase [EC:2.1.1.72]	0	0	0	0	1	0	0	0	0	0	0	0	0	0	0	0	0	0	0	0	0	0	0	1	0	0	0	1	0	1	0
K07319	Protein families: signaling and cellular processes	yhdJ; adenine-specific DNA-methyltransferase [EC:2.1.1.72]	0	0	0	0	1	0	0	0	0	0	0	0	0	0	0	0	0	0	0	0	0	0	0	1	0	0	0	1	0	1	0
K07320	Protein families: genetic information processing	prmB; ribosomal protein L3 glutamine methyltransferase [EC:2.1.1.298]	1	1	1	1	0	0	0	0	0	0	0	0	1	0	0	0	0	0	1	0	0	0	0	0	0	0	0	0	0	0	0
K07333	Protein families: signaling and cellular processes	flaJ; archaeal flagellar protein FlaJ	0	0	1	0	0	0	0	0	0	0	0	0	0	0	0	0	0	0	0	0	0	0	0	0	0	0	0	0	0	0	0
K07334	Protein families: signaling and cellular processes	higB-1; toxin HigB-1	0	0	0	0	0	0	0	0	0	0	0	0	0	0	0	0	0	0	0	0	0	0	1	0	0	0	0	0	0	0	0
K07335	Membrane transport	bmpA, bmpB, tmpC; basic membrane protein A and related proteins	2	2	2	2	2	2	2	3	2	2	2	2	2	2	1	1	2	1	4	2	1	1	2	2	2	1	1	3	2	2	2
K07335	Membrane transport	bmpA, bmpB, tmpC; basic membrane protein A and related proteins	2	2	2	2	2	2	2	3	2	2	2	2	2	2	1	1	2	1	4	2	1	1	2	2	2	1	1	3	2	2	2
K07339	Protein families: signaling and cellular processes	hicA; mRNA interferase HicA [EC:3.1.-.-]	0	1	0	0	0	0	0	0	1	1	0	1	1	0	0	0	1	1	1	0	0	0	0	0	2	0	0	0	0	0	1
K07340	Unclassified: signaling and cellular processes	ybbJ; inner membrane protein	0	0	0	0	0	0	0	0	0	0	0	0	0	0	0	0	0	0	0	0	0	0	1	0	0	0	0	0	0	0	0
K07341	Protein families: signaling and cellular processes	doc; death on curing protein	0	0	0	0	0	0	0	0	0	0	0	0	0	0	0	0	0	0	0	0	0	0	0	0	0	0	0	0	0	1	0
K07390	Protein families: genetic information processing	grxD, GLRX5; monothiol glutaredoxin	1	1	1	1	1	1	0	1	1	1	1	0	1	1	2	1	1	1	1	1	0	0	1	1	1	1	1	1	1	1	1
K07391	Unclassified: genetic information processing	comM; magnesium chelatase family protein	1	1	1	1	2	1	1	1	2	1	2	2	2	1	2	1	1	1	2	1	1	1	1	1	1	2	1	1	1	1	1
K07391	Unclassified: genetic information processing	comM; magnesium chelatase family protein	1	1	1	1	2	1	1	1	2	1	2	2	2	1	2	1	1	1	2	1	1	1	1	1	1	2	1	1	1	1	1
K07397	Unclassified: genetic information processing	yhfA; putative redox protein	1	0	0	1	0	0	0	0	0	0	0	0	1	0	0	0	0	0	0	0	0	0	1	0	1	1	0	1	0	1	1
K07397	Unclassified: genetic information processing	yhfA; putative redox protein	1	0	0	1	0	0	0	0	0	0	0	0	1	0	0	0	0	0	0	0	0	0	1	0	1	1	0	1	0	1	1
K07403	Unclassified: genetic information processing	nfeD; membrane-bound serine protease (ClpP class)	2	2	2	2	1	2	2	1	2	2	2	2	2	2	2	3	3	3	0	2	2	2	2	1	2	1	1	1	1	1	1
K07403	Unclassified: genetic information processing	nfeD; membrane-bound serine protease (ClpP class)	2	2	2	2	1	2	2	1	2	2	2	2	2	2	2	3	3	3	0	2	2	2	2	1	2	1	1	1	1	1	1
K07406	Carbohydrate metabolism	melA; alpha-galactosidase [EC:3.2.1.22]	2	4	3	4	3	4	5	2	4	5	3	2	1	11	1	3	6	3	2	7	2	4	0	1	0	0	0	1	0	1	0
K07407	Carbohydrate metabolism	E3.2.1.22B, galA, rafA; alpha-galactosidase [EC:3.2.1.22]	0	0	0	0	0	0	0	0	0	0	0	0	0	0	0	0	0	0	0	0	0	0	0	0	0	1	1	0	1	0	1
K07442	Protein families: genetic information processing	TRM61, GCD14; tRNA (adenine57-N1/adenine58-N1)-methyltransferase catalytic subunit [EC:2.1.1.219 2.1.1.220]	1	1	2	1	1	1	1	1	1	1	1	1	0	1	1	1	1	1	0	1	1	1	1	1	1	1	1	0	1	1	2
K07445	Unclassified: genetic information processing	K07445; putative DNA methylase	0	1	0	2	2	0	0	2	0	0	1	0	0	0	0	1	0	0	0	0	0	1	0	2	0	0	0	0	0	0	0
K07447	Protein families: genetic information processing	ruvX; putative pre-16S rRNA nuclease [EC:3.1.-.-]	1	1	1	1	1	1	1	1	1	1	1	1	1	1	1	1	1	1	0	1	1	1	1	1	1	1	0	1	1	1	1
K07448	Protein families: signaling and cellular processes	mrr; restriction system protein	0	0	1	0	0	0	0	0	0	0	0	0	3	0	0	0	0	0	1	0	0	1	0	1	2	1	0	0	2	0	0
K07448	Protein families: signaling and cellular processes	mrr; restriction system protein	0	0	1	0	0	0	0	0	0	0	0	0	3	0	0	0	0	0	1	0	0	1	0	1	2	1	0	0	2	0	0
K07450	Unclassified: genetic information processing	K07450; putative resolvase	0	0	0	0	0	0	0	0	0	0	0	0	0	0	0	0	0	0	0	0	0	0	0	0	0	0	0	0	0	1	0
K07451	Protein families: signaling and cellular processes	mcrA; 5-methylcytosine-specific restriction enzyme A [EC:3.1.21.-]	0	0	0	0	0	0	0	0	0	0	0	0	0	0	0	0	0	0	0	0	0	0	0	0	1	0	0	0	0	1	0
K07452	Protein families: signaling and cellular processes	mcrB; 5-methylcytosine-specific restriction enzyme B [EC:3.1.21.-]	0	0	0	0	0	0	1	0	0	0	0	0	0	0	0	0	0	0	2	0	2	2	1	0	1	0	1	0	0	0	0
K07452	Protein families: signaling and cellular processes	mcrB; 5-methylcytosine-specific restriction enzyme B [EC:3.1.21.-]	0	0	0	0	0	0	1	0	0	0	0	0	0	0	0	0	0	0	2	0	2	2	1	0	1	0	1	0	0	0	0
K07455	Protein families: genetic information processing	recT; recombination protein RecT	0	0	0	0	0	0	0	0	0	0	0	0	0	0	0	0	0	0	0	0	0	0	0	0	0	0	0	0	0	0	1
K07456	Replication and repair	mutS2; DNA mismatch repair protein MutS2	1	1	1	1	1	1	1	1	2	2	1	0	1	1	1	2	1	2	1	1	1	1	1	1	1	1	1	1	1	1	1
K07456	Replication and repair	mutS2; DNA mismatch repair protein MutS2	1	1	1	1	1	1	1	1	2	2	1	0	1	1	1	2	1	2	1	1	1	1	1	1	1	1	1	1	1	1	1
K07459	Unclassified: genetic information processing	ybjD; putative ATP-dependent endonuclease of the OLD family	0	0	0	0	0	0	0	0	0	0	1	0	0	0	0	0	0	0	0	0	0	0	0	0	0	0	0	0	0	1	0
K07459	Unclassified: genetic information processing	ybjD; putative ATP-dependent endonuclease of the OLD family	0	0	0	0	0	0	0	0	0	0	1	0	0	0	0	0	0	0	0	0	0	0	0	0	0	0	0	0	0	1	0
K07460	Unclassified: genetic information processing	yraN; putative endonuclease	1	1	1	1	1	1	1	1	1	1	1	0	1	1	1	1	0	1	0	1	1	1	1	1	1	1	1	1	1	1	1
K07461	Unclassified: genetic information processing	K07461; putative endonuclease	0	1	0	0	0	0	0	1	0	3	1	0	0	0	0	1	1	2	0	1	0	1	1	0	0	2	0	1	0	1	0
K07462	Replication and repair	recJ; single-stranded-DNA-specific exonuclease [EC:3.1.-.-]	1	1	1	1	1	1	1	0	1	2	1	1	1	1	1	1	2	1	1	1	1	1	1	1	1	1	1	1	1	1	1
K07464	Protein families: signaling and cellular processes	cas4; CRISPR-associated exonuclease Cas4 [EC:3.1.12.1]	3	3	2	2	2	2	2	2	0	2	2	1	1	1	1	2	1	1	2	1	3	3	0	1	1	1	0	0	2	1	0
K07465	Unclassified: genetic information processing	K07465; putative RecB family exonuclease	0	0	0	0	0	0	0	0	1	1	0	0	0	1	0	1	1	1	0	1	2	2	0	0	0	0	0	0	0	0	0
K07468	Unclassified: metabolism	K07468; putative ATP-dependent DNA ligase [EC:6.5.1.1]	0	0	0	0	0	0	0	0	0	0	0	0	0	0	0	0	0	0	0	0	1	1	0	0	0	0	0	0	0	0	0
K07470	Unclassified: genetic information processing	sbmC; DNA gyrase inhibitor	0	0	0	0	0	0	0	0	0	0	0	0	0	0	0	0	0	0	0	0	0	0	0	0	1	1	0	1	0	1	1
K07478	Unclassified: genetic information processing	ycaJ; putative ATPase	2	2	3	2	1	1	3	3	1	1	2	1	0	1	1	1	1	1	0	1	2	2	1	1	2	1	1	0	2	1	2
K07478	Unclassified: genetic information processing	ycaJ; putative ATPase	2	2	3	2	1	1	3	3	1	1	2	1	0	1	1	1	1	1	0	1	2	2	1	1	2	1	1	0	2	1	2
K07483	Unclassified: genetic information processing	K07483; transposase	0	1	0	0	0	1	0	1	0	1	0	0	0	0	0	0	1	4	1	1	1	1	0	3	0	1	0	1	0	1	0
K07484	Unclassified: genetic information processing	K07484; transposase	1	0	0	1	0	0	0	0	1	1	0	0	0	0	0	0	1	0	0	1	0	0	0	0	1	0	0	0	0	0	0
K07484	Unclassified: genetic information processing	K07484; transposase	1	0	0	1	0	0	0	0	1	1	0	0	0	0	0	0	1	0	0	1	0	0	0	0	1	0	0	0	0	0	0
K07486	Unclassified: genetic information processing	K07486; transposase	2	9	0	1	0	0	0	1	4	1	1	0	2	1	1	2	0	4	0	2	3	1	1	2	1	11	0	2	0	1	1
K07487	Unclassified: genetic information processing	K07487; transposase	0	0	0	0	0	0	0	0	0	0	0	0	0	0	0	0	0	0	0	0	0	0	0	0	2	5	0	2	0	0	0
K07488	Unclassified: genetic information processing	K07488; transposase	0	1	0	1	0	0	0	0	0	0	0	0	0	0	0	0	0	0	0	0	0	0	0	0	0	0	0	0	0	0	0
K07491	Unclassified: genetic information processing	rayT; REP-associated tyrosine transposase	0	2	1	0	0	0	0	0	0	0	0	0	1	0	0	1	0	0	0	0	0	0	0	0	0	3	0	0	0	1	0
K07491	Unclassified: genetic information processing	rayT; REP-associated tyrosine transposase	0	2	1	0	0	0	0	0	0	0	0	0	1	0	0	1	0	0	0	0	0	0	0	0	0	3	0	0	0	1	0
K07493	Unclassified: genetic information processing	K07493; putative transposase	1	1	4	4	0	0	1	1	0	0	4	0	1	0	0	0	1	0	0	0	2	1	0	3	2	0	0	0	0	0	0
K07494	Unclassified: genetic information processing	K07494; putative transposase	0	0	0	0	0	0	0	0	0	0	0	0	0	0	0	0	0	1	0	0	0	0	0	0	0	0	0	0	0	0	0
K07495	Unclassified: genetic information processing	K07495; putative transposase	0	0	0	0	0	0	0	0	0	0	0	0	0	0	0	0	0	0	0	0	0	0	0	0	0	0	0	0	0	1	0
K07496	Unclassified: genetic information processing	K07496; putative transposase	1	3	4	0	1	0	1	0	0	0	0	0	1	0	0	0	0	0	0	0	0	0	0	0	0	0	0	0	0	0	0
K07497	Unclassified: genetic information processing	K07497; putative transposase	1	16	1	2	0	1	0	6	3	4	10	1	0	2	1	3	8	17	2	4	3	1	2	3	0	14	0	3	0	1	1
K07497	Unclassified: genetic information processing	K07497; putative transposase	1	16	1	2	0	1	0	6	3	4	10	1	0	2	1	3	8	17	2	4	3	1	2	3	0	14	0	3	0	1	1
K07499	Unclassified: genetic information processing	K07499; putative transposase	0	0	0	0	0	0	0	0	0	0	0	0	0	0	0	0	0	1	0	0	0	0	0	0	0	0	0	0	0	0	0
K07501	Unclassified: genetic information processing	K07501; 3'-5' exonuclease	1	1	1	1	1	1	1	1	0	0	1	0	1	0	0	0	0	0	0	0	0	0	0	0	0	0	0	0	0	0	0
K07502	Poorly characterized	yprB; uncharacterized protein	1	1	1	1	1	1	1	1	1	1	1	1	1	1	1	1	1	0	1	1	1	1	1	1	1	1	1	1	1	1	1
K07504	Unclassified: genetic information processing	K07504; predicted type IV restriction endonuclease	0	0	0	0	0	0	0	0	1	1	0	0	0	0	0	0	1	0	0	0	0	0	0	0	0	0	0	0	0	0	0
K07506	Protein families: genetic information processing	K07506; AraC family transcriptional regulator	0	0	1	1	0	0	1	0	0	0	0	0	0	0	0	0	0	0	0	0	0	0	0	0	0	0	0	0	0	0	0
K07506	Protein families: genetic information processing	K07506; AraC family transcriptional regulator	0	0	1	1	0	0	1	0	0	0	0	0	0	0	0	0	0	0	0	0	0	0	0	0	0	0	0	0	0	0	0
K07507	Protein families: signaling and cellular processes	mgtC; putative Mg2+ transporter-C (MgtC) family protein	1	1	1	1	1	1	1	1	1	1	1	0	1	1	0	0	3	1	1	1	1	1	1	1	1	1	0	1	1	1	1
K07533	Protein families: genetic information processing	prsA; foldase protein PrsA [EC:5.2.1.8]	0	0	0	0	0	0	0	0	0	0	0	0	1	0	0	0	0	0	0	0	0	0	0	0	0	0	0	0	0	0	0
K07535	Xenobiotics biodegradation and metabolism	badH; 2-hydroxycyclohexanecarboxyl-CoA dehydrogenase [EC:1.1.1.-]	0	0	0	0	0	0	0	0	0	0	0	0	0	0	0	0	0	0	0	0	0	0	1	1	0	0	0	0	0	0	0
K07552	Protein families: signaling and cellular processes	bcr, tcaB; MFS transporter, DHA1 family, multidrug resistance protein	0	0	0	0	0	0	0	0	1	1	0	0	0	1	0	1	1	1	0	1	0	0	0	0	0	0	0	0	0	0	0
K07554	Unclassified: metabolism	ATPeF0S, ATP5S; ATP synthase, H+ transporting, mitochondrial F0 complex, subunit s	0	0	0	1	0	0	0	0	0	0	0	0	0	0	0	0	0	0	0	0	0	0	0	0	0	0	0	0	0	0	0
K07560	Protein families: genetic information processing	dtd, DTD; D-aminoacyl-tRNA deacylase [EC:3.1.1.96]	1	1	1	1	1	1	1	1	1	1	1	0	1	1	1	1	1	1	1	1	1	1	1	1	1	1	1	1	1	1	1
K07566	Protein families: genetic information processing	tsaC, rimN, SUA5, YRDC; L-threonylcarbamoyladenylate synthase [EC:2.7.7.87]	1	2	2	1	2	1	2	2	1	1	2	2	2	2	1	0	0	0	0	1	2	2	2	2	2	2	1	2	3	2	2
K07566	Protein families: genetic information processing	tsaC, rimN, SUA5, YRDC; L-threonylcarbamoyladenylate synthase [EC:2.7.7.87]	1	2	2	1	2	1	2	2	1	1	2	2	2	2	1	0	0	0	0	1	2	2	2	2	2	2	1	2	3	2	2
K07568	Protein families: genetic information processing	queA; S-adenosylmethionine:tRNA ribosyltransferase-isomerase [EC:2.4.99.17]	1	1	2	1	1	1	1	1	1	1	1	0	1	1	1	1	1	1	0	1	1	1	1	1	1	1	1	1	1	1	1
K07570	Unclassified: genetic information processing	GSP13; general stress protein 13	1	1	1	1	1	1	1	1	1	1	1	0	0	1	0	1	1	1	1	1	1	1	1	1	1	1	1	1	1	1	1
K07571	Unclassified: genetic information processing	K07571; S1 RNA binding domain protein	1	1	1	1	1	1	1	1	1	1	1	0	0	1	0	1	1	1	1	1	1	1	1	1	1	1	1	1	1	1	1
K07576	Unclassified: genetic information processing	K07576; metallo-beta-lactamase family protein	1	1	1	1	1	1	1	0	1	1	1	1	1	1	1	1	1	1	0	1	1	1	1	1	1	1	1	1	1	1	1
K07577	Unclassified: genetic information processing	K07577; putative mRNA 3-end processing factor	0	0	0	0	0	0	0	0	0	0	0	0	0	0	0	0	0	0	0	0	0	0	0	1	0	1	0	0	0	0	0
K07589	Metabolism of cofactors and vitamins	folX; D-erythro-7,8-dihydroneopterin triphosphate epimerase [EC:5.1.99.7]	0	0	0	0	0	0	0	0	0	0	0	0	0	0	0	0	0	0	0	0	0	0	0	1	0	0	0	0	0	0	0
K07590	Translation	RP-L7A, rplGB; large subunit ribosomal protein L7A	1	1	1	1	1	1	1	1	1	1	1	1	1	0	1	1	1	1	0	1	1	1	0	0	0	0	0	0	0	0	0
K07623	Unclassified: signaling and cellular processes	GJB4, CX30.3; gap junction beta-4 protein	0	0	0	0	0	0	0	0	0	0	0	0	0	0	0	0	0	0	0	0	0	0	0	0	0	0	1	0	0	0	0
K07636	Signal transduction	phoR; two-component system, OmpR family, phosphate regulon sensor histidine kinase PhoR [EC:2.7.13.3]	1	0	0	0	2	0	1	1	0	0	1	0	1	0	0	0	1	0	0	0	0	0	0	1	0	1	0	0	0	0	0
K07636	Signal transduction	phoR; two-component system, OmpR family, phosphate regulon sensor histidine kinase PhoR [EC:2.7.13.3]	1	0	0	0	2	0	1	1	0	0	1	0	1	0	0	0	1	0	0	0	0	0	0	1	0	1	0	0	0	0	0
K07644	Signal transduction	cusS, copS, silS; two-component system, OmpR family, heavy metal sensor histidine kinase CusS [EC:2.7.13.3]	0	0	0	0	0	0	0	0	0	0	0	0	1	0	0	0	0	0	0	0	0	0	0	0	0	0	0	0	0	0	0
K07651	Signal transduction	resE; two-component system, OmpR family, sensor histidine kinase ResE [EC:2.7.13.3]	1	1	1	1	1	1	1	1	1	1	1	2	1	1	1	1	2	1	2	1	1	1	1	0	1	0	0	0	1	0	1
K07651	Signal transduction	resE; two-component system, OmpR family, sensor histidine kinase ResE [EC:2.7.13.3]	1	1	1	1	1	1	1	1	1	1	1	2	1	1	1	1	2	1	2	1	1	1	1	0	1	0	0	0	1	0	1
K07652	Signal transduction	vicK; two-component system, OmpR family, sensor histidine kinase VicK [EC:2.7.13.3]	0	0	0	0	0	0	0	0	0	0	0	0	0	0	0	0	0	0	1	0	0	1	0	0	0	0	1	0	0	0	0
K07653	Signal transduction	mprB; two-component system, OmpR family, sensor histidine kinase MprB [EC:2.7.13.3]	0	0	0	0	0	0	0	0	0	0	0	0	1	0	0	0	0	0	0	0	0	0	0	0	0	0	0	0	0	0	0
K07673	Signal transduction	narX; two-component system, NarL family, nitrate/nitrite sensor histidine kinase NarX [EC:2.7.13.3]	0	1	1	0	0	0	0	1	0	0	0	0	0	0	0	0	0	0	0	0	0	0	0	0	0	1	0	0	0	0	0
K07675	Signal transduction	uhpB; two-component system, NarL family, sensor histidine kinase UhpB [EC:2.7.13.3]	0	0	0	0	0	1	0	0	0	0	0	0	0	0	0	0	0	0	0	0	0	0	0	0	0	1	0	0	0	1	0
K07678	Signal transduction	barA, gacS, varS; two-component system, NarL family, sensor histidine kinase BarA [EC:2.7.13.3]	0	0	0	0	0	0	0	1	0	0	0	0	0	0	0	0	0	0	0	0	0	0	0	0	0	0	0	0	0	0	0
K07679	Signal transduction	evgS, bvgS; two-component system, NarL family, sensor histidine kinase EvgS [EC:2.7.13.3]	0	0	0	0	0	0	0	0	0	0	0	0	0	0	0	0	0	0	0	0	0	0	1	0	1	1	0	1	1	1	1
K07680	Signal transduction	comP; two-component system, NarL family, sensor histidine kinase ComP [EC:2.7.13.3]	0	0	0	0	0	0	1	0	0	0	0	0	0	0	0	0	0	0	0	0	0	0	0	0	0	0	0	0	0	0	0
K07681	Signal transduction	vraS; two-component system, NarL family, vancomycin resistance sensor histidine kinase VraS [EC:2.7.13.3]	0	1	1	0	0	0	0	1	0	0	0	0	0	0	0	0	0	0	0	0	0	0	0	0	0	1	0	0	0	0	0
K07683	Signal transduction	nreB; two-component system, NarL family, sensor histidine kinase NreB [EC:2.7.13.3]	0	0	0	0	0	0	1	0	0	0	0	0	0	0	0	0	0	0	0	0	0	0	0	0	0	0	0	0	0	0	0
K07684	Signal transduction	narL; two-component system, NarL family, nitrate/nitrite response regulator NarL	0	0	1	1	0	0	0	1	0	0	1	0	1	0	0	0	0	0	0	0	0	0	0	0	0	0	0	0	0	0	0
K07684	Signal transduction	narL; two-component system, NarL family, nitrate/nitrite response regulator NarL	0	0	1	1	0	0	0	1	0	0	1	0	1	0	0	0	0	0	0	0	0	0	0	0	0	0	0	0	0	0	0
K07686	Signal transduction	uhpA; two-component system, NarL family, uhpT operon response regulator UhpA	0	0	0	0	0	1	0	0	0	0	0	0	0	0	0	0	0	0	0	0	0	0	0	0	0	0	0	0	0	0	0
K07689	Signal transduction	uvrY, gacA, varA; two-component system, NarL family, invasion response regulator UvrY	0	1	1	0	1	0	0	0	0	0	0	0	0	0	0	0	0	0	0	0	0	0	0	0	0	0	0	0	0	0	0
K07692	Signal transduction	degU; two-component system, NarL family, response regulator DegU	2	2	2	2	0	0	0	0	0	0	0	0	1	0	0	0	0	0	2	0	0	0	0	0	0	1	0	0	0	0	0
K07693	Signal transduction	desR; two-component system, NarL family, response regulator DesR	0	0	0	0	0	0	0	1	0	0	0	0	0	0	0	0	0	0	0	0	0	0	0	0	0	0	0	0	0	0	0
K07694	Signal transduction	vraR; two-component system, NarL family, vancomycin resistance associated response regulator VraR	0	0	0	0	0	0	0	0	0	0	0	0	1	0	0	0	0	0	0	0	0	0	0	0	0	0	0	0	0	0	0
K07696	Signal transduction	nreC; two-component system, NarL family, response regulator NreC	0	0	0	0	0	0	0	0	0	0	0	0	0	0	0	0	0	0	0	0	0	1	0	0	0	0	0	0	0	0	0
K07697	Signal transduction	kinB; two-component system, sporulation sensor kinase B [EC:2.7.13.3]	0	0	0	0	0	0	0	0	0	0	0	1	0	0	0	0	0	0	0	0	0	0	0	0	0	0	0	0	0	0	0
K07699	Signal transduction	spo0A; two-component system, response regulator, stage 0 sporulation protein A	0	0	0	0	0	0	0	0	0	0	0	0	0	0	0	0	0	0	1	0	0	0	0	0	0	0	0	0	0	0	0
K07704	Signal transduction	lytS; two-component system, LytTR family, sensor histidine kinase LytS [EC:2.7.13.3]	0	0	0	0	0	0	0	0	0	0	0	0	0	1	0	0	1	0	1	0	1	1	0	1	0	1	0	0	0	0	0
K07709	Signal transduction	zraS, hydH; two-component system, NtrC family, sensor histidine kinase HydH [EC:2.7.13.3]	0	0	0	0	0	0	3	0	0	0	1	1	0	0	0	0	0	0	0	0	1	1	0	0	0	0	0	0	0	0	0
K07710	Signal transduction	atoS; two-component system, NtrC family, sensor histidine kinase AtoS [EC:2.7.13.3]	1	1	1	1	1	1	0	0	1	1	0	0	1	1	2	0	1	0	1	1	0	0	0	0	0	0	0	0	0	0	0
K07712	Signal transduction	glnG, ntrC; two-component system, NtrC family, nitrogen regulation response regulator GlnG	1	1	1	1	1	1	0	0	1	1	0	0	1	1	0	1	1	1	1	1	1	1	0	0	0	0	0	0	0	0	0
K07713	Signal transduction	zraR, hydG; two-component system, NtrC family, response regulator HydG	0	0	0	0	0	0	1	1	0	0	0	1	0	0	0	1	1	0	0	0	0	0	0	0	0	0	0	0	0	0	0
K07714	Signal transduction	atoC; two-component system, NtrC family, response regulator AtoC	0	0	0	0	0	0	1	1	0	0	0	0	0	0	0	1	0	0	0	0	0	0	0	0	0	0	0	0	0	0	0
K07716	Signal transduction	pleC; two-component system, cell cycle sensor histidine kinase PleC [EC:2.7.13.3]	0	0	0	0	1	0	0	0	0	0	1	0	0	0	0	0	0	0	0	0	0	0	0	0	0	0	0	0	0	0	0
K07718	Signal transduction	yesM; two-component system, sensor histidine kinase YesM [EC:2.7.13.3]	0	1	1	0	0	0	1	0	0	0	0	0	0	1	1	0	1	0	0	0	0	0	0	0	0	0	0	0	0	0	0
K07719	Signal transduction	glnL; two-component system, response regulator GlnL	0	0	0	0	0	0	0	0	0	0	0	0	0	0	0	0	0	0	0	0	0	0	0	0	0	0	0	0	0	0	1
K07720	Signal transduction	yesN; two-component system, response regulator YesN	0	1	1	0	0	0	1	0	0	0	0	0	0	0	1	0	1	0	0	0	0	1	0	0	0	0	0	0	0	0	0
K07721	Protein families: genetic information processing	K07721; ArsR family transcriptional regulator	0	0	0	0	0	0	0	0	0	0	0	0	0	0	0	0	0	0	0	0	0	0	0	1	0	0	0	0	0	0	0
K07722	Protein families: genetic information processing	nikR; CopG family transcriptional regulator, nickel-responsive regulator	2	2	3	2	2	1	1	1	1	1	2	1	2	1	1	1	1	1	0	1	1	1	1	2	1	1	1	1	1	1	1
K07738	Protein families: genetic information processing	nrdR; transcriptional repressor NrdR	1	2	1	1	1	1	1	1	1	1	1	0	1	1	1	1	1	1	1	1	1	1	1	1	1	1	1	1	1	1	1
K07739	Protein families: genetic information processing	ELP3, KAT9; elongator complex protein 3 (tRNA uridine(34) acetyltransferase) [EC:2.3.1.-]	0	0	0	0	0	0	0	0	0	0	0	0	0	0	0	0	0	0	0	0	0	0	0	1	0	0	0	0	0	0	0
K07742	Poorly characterized	ylxR; uncharacterized protein	1	1	1	1	1	1	1	1	0	1	1	1	1	0	1	0	1	0	0	0	1	1	1	1	1	1	1	1	1	1	1
K07752	Protein families: metabolism	CPD; carboxypeptidase D [EC:3.4.17.22]	0	0	0	0	0	0	0	0	0	0	0	0	0	0	0	0	0	0	0	0	0	0	0	0	0	0	0	0	0	1	0
K07755	Cancer: overview	AS3MT; arsenite methyltransferase [EC:2.1.1.137]	1	0	0	2	0	0	2	2	0	0	0	0	0	0	0	0	0	0	1	0	0	0	2	2	3	1	1	2	2	1	2
K07755	Cancer: overview	AS3MT; arsenite methyltransferase [EC:2.1.1.137]	1	0	0	2	0	0	2	2	0	0	0	0	0	0	0	0	0	0	1	0	0	0	2	2	3	1	1	2	2	1	2
K07769	Signal transduction	nblS, dfr, dspA, hik33; two-component system, OmpR family, sensor histidine kinase NblS [EC:2.7.13.3]	0	0	0	0	0	0	0	0	0	0	0	0	0	0	0	0	1	0	0	0	0	0	0	0	0	0	0	0	0	0	0
K07777	Signal transduction	degS; two-component system, NarL family, sensor histidine kinase DegS [EC:2.7.13.3]	0	1	2	1	0	0	0	0	0	0	0	0	1	0	1	0	0	0	1	0	1	1	1	1	1	0	0	1	1	1	0
K07777	Signal transduction	degS; two-component system, NarL family, sensor histidine kinase DegS [EC:2.7.13.3]	0	1	2	1	0	0	0	0	0	0	0	0	1	0	1	0	0	0	1	0	1	1	1	1	1	0	0	1	1	1	0
K07782	Signal transduction	sdiA; LuxR family transcriptional regulator, quorum-sensing system regulator SdiA	0	1	1	1	1	0	0	1	0	0	0	0	0	0	0	0	0	0	0	0	0	0	0	0	0	0	0	0	0	0	0
K07793	Signal transduction	tctA; putative tricarboxylic transport membrane protein	0	0	1	1	0	0	0	0	2	2	0	0	0	1	0	3	1	2	1	2	1	1	0	0	0	0	0	0	0	0	0
K07803	Signal transduction	zraP; zinc resistance-associated protein	1	0	1	1	0	0	0	0	0	0	1	0	1	0	0	0	0	0	0	0	0	0	0	0	0	0	0	0	0	0	0
K07814	Unclassified: metabolism	K07814; cyclic di-GMP phosphodiesterase [EC:3.1.4.-]	2	1	3	3	2	2	1	2	0	1	1	1	1	1	0	2	2	1	0	0	1	0	1	1	5	2	1	2	2	3	2
K07814	Unclassified: metabolism	K07814; cyclic di-GMP phosphodiesterase [EC:3.1.4.-]	2	1	3	3	2	2	1	2	0	1	1	1	1	1	0	2	2	1	0	0	1	0	1	1	5	2	1	2	2	3	2
K07816	Nucleotide metabolism	E2.7.6.5; GTP pyrophosphokinase [EC:2.7.6.5]	1	0	0	0	1	0	0	0	0	0	1	0	1	0	0	0	0	0	0	0	0	0	0	0	0	0	0	0	0	0	0
K07979	Protein families: genetic information processing	ytrA; GntR family transcriptional regulator	0	0	0	0	0	0	0	0	0	0	0	0	0	0	0	0	0	0	1	0	0	0	0	0	0	0	0	0	0	0	0
K08084	Protein families: signaling and cellular processes	fimT; type IV fimbrial biogenesis protein FimT	1	1	1	1	1	1	1	1	1	1	1	0	1	1	0	0	1	0	0	1	1	1	1	0	1	1	0	1	1	1	1
K08093	Carbohydrate metabolism	hxlA; 3-hexulose-6-phosphate synthase [EC:4.1.2.43]	1	4	2	1	1	1	2	2	1	1	1	0	2	1	0	1	1	1	1	1	0	0	2	2	4	2	1	2	2	0	2
K08093	Carbohydrate metabolism	hxlA; 3-hexulose-6-phosphate synthase [EC:4.1.2.43]	1	4	2	1	1	1	2	2	1	1	1	0	2	1	0	1	1	1	1	1	0	0	2	2	4	2	1	2	2	0	2
K08094	Carbohydrate metabolism	hxlB; 6-phospho-3-hexuloisomerase [EC:5.3.1.27]	1	2	1	1	1	1	2	1	1	1	2	0	1	1	0	1	1	1	1	1	1	1	2	2	4	2	1	2	2	1	2
K08094	Carbohydrate metabolism	hxlB; 6-phospho-3-hexuloisomerase [EC:5.3.1.27]	1	2	1	1	1	1	2	1	1	1	2	0	1	1	0	1	1	1	1	1	1	1	2	2	4	2	1	2	2	1	2
K08151	Protein families: signaling and cellular processes	tetA; MFS transporter, DHA1 family, tetracycline resistance protein	0	0	0	0	0	1	0	0	0	0	0	0	0	0	0	0	0	0	0	0	0	0	0	0	0	0	0	0	0	0	0
K08153	Protein families: signaling and cellular processes	blt; MFS transporter, DHA1 family, multidrug resistance protein	0	0	0	0	0	1	0	0	0	0	0	0	0	0	0	0	0	0	0	0	0	1	0	0	0	1	0	0	0	0	0
K08153	Protein families: signaling and cellular processes	blt; MFS transporter, DHA1 family, multidrug resistance protein	0	0	0	0	0	1	0	0	0	0	0	0	0	0	0	0	0	0	0	0	0	1	0	0	0	1	0	0	0	0	0
K08174	Protein families: signaling and cellular processes	glcP; MFS transporter, FHS family, glucose/mannose:H+ symporter	0	0	0	0	0	0	0	0	0	0	0	0	0	0	0	0	0	0	0	0	0	0	0	0	1	1	0	0	0	0	1
K08177	Protein families: signaling and cellular processes	oxlT; MFS transporter, OFA family, oxalate/formate antiporter	2	2	3	3	2	1	2	2	0	0	2	0	2	0	0	0	0	0	0	0	1	1	0	0	0	1	0	0	0	0	0
K08195	Protein families: signaling and cellular processes	pcaK; MFS transporter, AAHS family, 4-hydroxybenzoate transporter	0	0	0	0	0	0	0	0	1	1	0	0	0	1	0	1	1	1	0	1	0	0	0	0	0	0	0	0	0	0	0
K08223	Protein families: signaling and cellular processes	fsr; MFS transporter, FSR family, fosmidomycin resistance protein	1	1	1	1	0	1	1	1	2	2	1	1	1	2	0	2	2	2	0	2	1	1	2	2	2	2	0	2	2	2	2
K08223	Protein families: signaling and cellular processes	fsr; MFS transporter, FSR family, fosmidomycin resistance protein	1	1	1	1	0	1	1	1	2	2	1	1	1	2	0	2	2	2	0	2	1	1	2	2	2	2	0	2	2	2	2
K08234	Unclassified: metabolism	yaeR; glyoxylase I family protein	1	1	0	0	1	0	0	0	2	2	1	0	1	2	3	2	3	1	1	2	1	0	0	0	0	0	0	0	0	0	0
K08234	Unclassified: metabolism	yaeR; glyoxylase I family protein	1	1	0	0	1	0	0	0	2	2	1	0	1	2	3	2	3	1	1	2	1	0	0	0	0	0	0	0	0	0	0
K08259	Protein families: metabolism	lytM; lysostaphin [EC:3.4.24.75]	1	1	2	1	1	1	1	1	0	0	1	1	1	0	0	0	0	0	0	0	1	1	1	1	1	1	1	1	1	3	1
K08281	Metabolism of cofactors and vitamins	pncA; nicotinamidase/pyrazinamidase [EC:3.5.1.19 3.5.1.-]	1	1	1	1	1	1	1	1	2	2	1	1	1	0	2	1	2	1	1	1	1	1	0	1	1	1	0	1	0	1	1
K08300	Folding, sorting and degradation	rne; ribonuclease E [EC:3.1.26.12]	0	0	0	0	0	1	1	0	1	1	1	0	0	1	0	0	1	0	0	1	1	1	1	0	1	0	0	1	0	1	1
K08301	Protein families: genetic information processing	rng, cafA; ribonuclease G [EC:3.1.26.-]	1	1	1	1	1	1	1	1	1	1	1	1	1	1	1	1	1	1	0	1	1	1	1	1	1	1	1	1	1	1	1
K08302	Carbohydrate metabolism	gatY-kbaY; tagatose 1,6-diphosphate aldolase GatY/KbaY [EC:4.1.2.40]	1	1	1	1	1	1	2	2	1	1	1	1	1	2	1	1	2	0	0	1	2	1	2	1	3	1	0	2	1	2	2
K08303	Infectious disease: bacterial	prtC, trhP; U32 family peptidase [EC:3.4.-.-]	0	0	0	0	1	0	0	0	0	0	0	0	0	0	0	0	0	0	0	0	0	0	0	0	0	0	0	0	0	0	0
K08306	Protein families: metabolism	mltC; membrane-bound lytic murein transglycosylase C [EC:4.2.2.-]	0	0	0	0	0	0	0	0	0	0	0	0	0	0	0	0	0	0	0	0	0	0	0	1	0	0	0	0	0	0	0
K08308	Protein families: metabolism	mltE, emtA; membrane-bound lytic murein transglycosylase E [EC:4.2.2.-]	0	0	0	0	0	0	0	0	0	0	0	0	0	0	0	0	0	0	0	0	0	0	0	1	0	0	0	0	0	0	0
K08309	Protein families: metabolism	slt; soluble lytic murein transglycosylase [EC:4.2.2.-]	1	1	1	1	2	1	2	1	2	2	1	1	1	2	1	2	2	2	1	2	1	1	2	1	3	2	2	2	2	2	2
K08309	Protein families: metabolism	slt; soluble lytic murein transglycosylase [EC:4.2.2.-]	1	1	1	1	2	1	2	1	2	2	1	1	1	2	1	2	2	2	1	2	1	1	2	1	3	2	2	2	2	2	2
K08314	Unclassified: metabolism	fsaB, talC; fructose-6-phosphate aldolase 2 [EC:4.1.2.-]	0	0	0	0	0	0	0	1	0	0	0	0	0	1	0	0	0	0	0	0	0	1	0	0	0	0	0	0	0	0	0
K08315	Protein families: metabolism	hycI; hydrogenase 3 maturation protease [EC:3.4.23.51]	1	1	1	1	0	1	0	0	0	0	1	0	1	0	0	0	0	0	0	0	1	1	0	0	0	0	0	0	0	0	0
K08316	Protein families: genetic information processing	rsmD; 16S rRNA (guanine966-N2)-methyltransferase [EC:2.1.1.171]	1	1	1	1	1	1	1	0	1	1	1	1	1	1	1	1	0	1	1	1	1	1	1	1	1	1	1	1	1	1	1
K08316	Protein families: genetic information processing	rsmD; 16S rRNA (guanine966-N2)-methyltransferase [EC:2.1.1.171]	1	1	1	1	1	1	1	0	1	1	1	1	1	1	1	1	0	1	1	1	1	1	1	1	1	1	1	1	1	1	1
K08320	Unclassified: metabolism	nudG; (d)CTP diphosphatase [EC:3.6.1.65]	1	1	1	1	1	1	1	1	0	0	0	0	1	0	0	0	0	0	0	0	0	0	1	1	1	1	0	1	1	1	1
K08321	Cellular community - prokaryotes	lsrF; 3-hydroxy-5-phosphonooxypentane-2,4-dione thiolase [EC:2.3.1.245]	0	0	0	0	0	0	0	0	0	0	0	0	0	0	0	0	0	0	0	0	0	0	0	0	0	0	0	0	0	1	0
K08322	Carbohydrate metabolism	rspB; L-gulonate 5-dehydrogenase [EC:1.1.1.380]	1	1	1	1	1	1	0	0	0	0	0	0	1	0	0	0	0	0	0	0	0	0	1	1	0	1	0	0	0	0	0
K08323	Carbohydrate metabolism	rspA, manD; mannonate dehydratase [EC:4.2.1.8]	0	0	0	0	0	0	0	0	0	0	0	0	0	0	0	0	0	0	2	0	0	0	0	0	0	0	0	0	0	0	0
K08325	Carbohydrate metabolism	yqhD; NADP-dependent alcohol dehydrogenase [EC:1.1.-.-]	0	0	0	0	0	0	0	0	0	0	0	0	0	0	0	0	0	0	0	0	1	0	0	0	0	0	0	0	0	0	0
K08326	Protein families: metabolism	ypdF; aminopeptidase [EC:3.4.11.-]	1	0	0	1	1	0	0	0	0	0	0	0	1	0	0	0	0	0	0	0	0	0	0	0	0	0	0	0	0	0	0
K08364	Protein families: signaling and cellular processes	merP; periplasmic mercuric ion binding protein	0	0	1	0	0	0	0	0	0	0	0	0	0	0	0	0	0	0	0	0	0	0	0	0	0	0	0	0	0	0	0
K08384	Glycan biosynthesis and metabolism	spoVD; stage V sporulation protein D (sporulation-specific penicillin-binding protein)	1	1	1	1	1	1	1	2	1	2	1	1	1	1	1	1	1	1	0	1	1	1	1	1	1	1	1	1	1	1	1
K08482	Unclassified: signaling and cellular processes	kaiC; circadian clock protein KaiC	0	0	0	0	1	0	0	2	0	0	1	0	0	0	0	0	0	0	0	0	0	0	0	0	0	0	0	0	0	0	0
K08591	Lipid metabolism	plsY; acyl phosphate:glycerol-3-phosphate acyltransferase [EC:2.3.1.275]	1	1	2	1	1	2	2	1	1	2	1	1	0	1	1	2	2	0	1	1	1	1	1	1	1	1	0	1	1	1	1
K08591	Lipid metabolism	plsY; acyl phosphate:glycerol-3-phosphate acyltransferase [EC:2.3.1.275]	1	1	2	1	1	2	2	1	1	2	1	1	0	1	1	2	2	0	1	1	1	1	1	1	1	1	0	1	1	1	1
K08602	Protein families: metabolism	pepF, pepB; oligoendopeptidase F [EC:3.4.24.-]	0	0	0	0	0	0	0	0	0	0	0	0	0	0	0	0	0	0	0	0	0	0	1	1	1	1	1	1	1	0	1
K08604	Cellular community - prokaryotes	hap, nprV; vibriolysin [EC:3.4.24.25]	0	0	0	0	0	0	0	1	0	0	0	0	0	0	0	0	0	0	0	0	0	0	0	0	0	1	0	0	0	0	0
K08641	Signal transduction	vanX; zinc D-Ala-D-Ala dipeptidase [EC:3.4.13.22]	0	0	0	0	0	0	0	0	0	0	0	0	0	0	0	0	0	0	0	0	0	0	1	1	1	1	0	1	0	2	0
K08676	Protein families: metabolism	tri; tricorn protease [EC:3.4.21.-]	0	0	0	0	0	1	0	0	0	0	0	0	0	0	0	0	0	0	1	0	0	0	0	0	0	0	0	0	0	0	0
K08678	Carbohydrate metabolism	UXS1, uxs; UDP-glucuronate decarboxylase [EC:4.1.1.35]	0	0	0	0	0	0	0	0	0	0	0	0	0	0	0	0	0	0	0	0	0	0	0	0	1	0	0	0	0	0	0
K08679	Carbohydrate metabolism	GAE, cap1J; UDP-glucuronate 4-epimerase [EC:5.1.3.6]	1	0	0	0	0	0	0	0	0	0	0	0	0	0	0	0	0	0	0	0	0	1	0	0	0	0	0	0	0	0	0
K08680	Metabolism of cofactors and vitamins	menH; 2-succinyl-6-hydroxy-2,4-cyclohexadiene-1-carboxylate synthase [EC:4.2.99.20]	1	1	1	1	1	1	1	1	0	0	1	0	1	0	0	0	0	0	0	0	0	0	0	0	0	0	0	0	0	0	0
K08681	Metabolism of cofactors and vitamins	pdxT, pdx2; pyridoxal 5'-phosphate synthase pdxT subunit [EC:4.3.3.6]	1	1	1	1	0	0	0	0	0	0	1	0	0	0	0	0	0	0	0	0	1	1	0	0	0	0	0	0	0	0	0
K08697	Unclassified: metabolism	ccmL; carbon dioxide concentrating mechanism protein CcmL	1	1	1	1	1	0	2	1	0	0	0	0	1	0	0	0	0	1	1	0	0	1	1	1	1	1	1	1	1	0	1
K08884	Protein families: metabolism	K08884; serine/threonine protein kinase, bacterial [EC:2.7.11.1]	0	1	1	1	0	0	1	0	0	0	0	0	1	0	1	0	0	0	1	0	1	1	1	1	1	1	1	1	1	1	1
K08941	Protein families: metabolism	pscB; photosystem P840 reaction center iron-sulfur protein	1	1	1	2	1	1	1	1	0	0	1	0	1	0	0	0	0	0	0	0	1	1	1	1	1	1	0	1	1	1	1
K08952	Protein families: metabolism	csmI; chlorosome envelope protein I	0	0	1	0	0	1	0	0	1	1	0	1	0	1	2	1	0	1	0	1	0	0	0	1	0	0	0	0	0	0	0
K08953	Protein families: metabolism	csmJ; chlorosome envelope protein J	0	0	1	0	0	1	0	0	1	1	0	1	0	1	2	1	0	1	0	1	0	0	0	1	0	0	0	0	0	0	0
K08954	Protein families: metabolism	csmX; chlorosome envelope protein X	0	0	1	0	0	1	0	0	1	1	0	1	0	1	2	1	0	1	0	1	0	0	0	1	0	0	0	0	0	0	0
K08963	Amino acid metabolism	mtnA; methylthioribose-1-phosphate isomerase [EC:5.3.1.23]	1	1	1	1	1	1	1	1	1	1	1	1	1	1	1	1	1	0	0	1	1	1	0	1	1	1	0	1	0	1	1
K08964	Amino acid metabolism	mtnB; methylthioribulose-1-phosphate dehydratase [EC:4.2.1.109]	1	1	1	1	1	1	0	0	0	0	2	0	0	0	0	0	0	0	0	0	0	0	0	0	0	1	0	0	0	0	0
K08969	Amino acid metabolism	mtnE, mtnV; L-glutamine---4-(methylsulfanyl)-2-oxobutanoate aminotransferase [EC:2.6.1.117]	0	0	0	0	0	0	0	0	0	0	0	0	0	0	0	0	0	0	0	0	0	0	1	0	1	0	0	1	1	0	1
K08982	Poorly characterized	K08982; putative membrane protein	0	0	0	1	0	0	0	0	0	0	0	0	1	0	0	0	0	0	0	0	0	1	0	0	0	0	0	0	0	0	0
K08998	Poorly characterized	K08998; uncharacterized protein	2	2	6	1	1	1	0	1	2	1	1	0	2	1	1	1	1	1	1	1	2	1	2	1	2	2	2	2	2	2	1
K08998	Poorly characterized	K08998; uncharacterized protein	2	2	6	1	1	1	0	1	2	1	1	0	2	1	1	1	1	1	1	1	2	1	2	1	2	2	2	2	2	2	1
K08999	Poorly characterized	K08999; uncharacterized protein	2	2	2	2	2	2	2	2	2	2	2	2	2	2	2	2	2	3	1	2	2	2	2	2	2	2	1	2	2	2	2
K09000	Protein families: signaling and cellular processes	cmr4; CRISPR-associated protein Cmr4	0	1	0	1	1	0	1	0	3	1	1	0	0	0	0	0	1	0	0	1	0	0	0	1	0	0	0	0	0	0	0
K09002	Protein families: signaling and cellular processes	csm3; CRISPR-associated protein Csm3	0	0	0	0	0	0	2	0	0	1	0	0	0	0	0	2	1	1	1	1	1	1	0	1	0	1	0	0	0	0	0
K09003	Poorly characterized	K09003; uncharacterized protein	1	2	1	1	1	1	1	1	1	1	1	1	1	1	1	1	1	0	1	1	1	1	2	1	3	1	0	1	1	1	1
K09005	Poorly characterized	K09005; uncharacterized protein	0	0	1	0	0	0	0	1	0	0	0	0	0	0	0	0	0	0	0	0	0	0	0	0	0	0	0	0	0	0	0
K09006	Protein families: genetic information processing	K09006; RNA-free ribonuclease P [EC:3.1.26.5]	0	0	0	0	0	0	0	0	0	0	0	0	0	0	0	0	0	0	0	0	1	1	0	0	0	0	0	0	0	0	0
[truncated: 1,977 more rows]

## Sheet: Supplementary Data 5
Supplementary Data 5. KEGG modules and KOs related to vitamin biosynthesis in Atribacterota genomes.
		M00019 : Valine/isoleucine biosynthesis, pyruvate => valine / 2-oxobutanoate => isoleucine	M00019 : Valine/isoleucine biosynthesis, pyruvate => valine / 2-oxobutanoate => isoleucine	M00019 : Valine/isoleucine biosynthesis, pyruvate => valine / 2-oxobutanoate => isoleucine	M00019 : Valine/isoleucine biosynthesis, pyruvate => valine / 2-oxobutanoate => isoleucine	M00019 : Valine/isoleucine biosynthesis, pyruvate => valine / 2-oxobutanoate => isoleucine	M00019 : Valine/isoleucine biosynthesis, pyruvate => valine / 2-oxobutanoate => isoleucine	M00019 : Valine/isoleucine biosynthesis, pyruvate => valine / 2-oxobutanoate => isoleucine	M00119 : Pantothenate biosynthesis, valine/L-aspartate => pantothenate	M00119 : Pantothenate biosynthesis, valine/L-aspartate => pantothenate	M00119 : Pantothenate biosynthesis, valine/L-aspartate => pantothenate	M00119 : Pantothenate biosynthesis, valine/L-aspartate => pantothenate	M00120 : Coenzyme A biosynthesis, pantothenate => CoA	M00120 : Coenzyme A biosynthesis, pantothenate => CoA	M00120 : Coenzyme A biosynthesis, pantothenate => CoA	M00120 : Coenzyme A biosynthesis, pantothenate => CoA	M00120 : Coenzyme A biosynthesis, pantothenate => CoA	M00120 : Coenzyme A biosynthesis, pantothenate => CoA	M00120 : Coenzyme A biosynthesis, pantothenate => CoA	M00120 : Coenzyme A biosynthesis, pantothenate => CoA	M00120 : Coenzyme A biosynthesis, pantothenate => CoA	M00120 : Coenzyme A biosynthesis, pantothenate => CoA	M00120 : Coenzyme A biosynthesis, pantothenate => CoA	M00120 : Coenzyme A biosynthesis, pantothenate => CoA	M00120 : Coenzyme A biosynthesis, pantothenate => CoA	M00125 : Riboflavin biosynthesis, plants and bacteria, GTP => riboflavin/FMN/FAD	M00125 : Riboflavin biosynthesis, plants and bacteria, GTP => riboflavin/FMN/FAD	M00125 : Riboflavin biosynthesis, plants and bacteria, GTP => riboflavin/FMN/FAD	M00125 : Riboflavin biosynthesis, plants and bacteria, GTP => riboflavin/FMN/FAD	M00125 : Riboflavin biosynthesis, plants and bacteria, GTP => riboflavin/FMN/FAD	M00125 : Riboflavin biosynthesis, plants and bacteria, GTP => riboflavin/FMN/FAD	M00125 : Riboflavin biosynthesis, plants and bacteria, GTP => riboflavin/FMN/FAD	M00125 : Riboflavin biosynthesis, plants and bacteria, GTP => riboflavin/FMN/FAD	M00125 : Riboflavin biosynthesis, plants and bacteria, GTP => riboflavin/FMN/FAD	M00125 : Riboflavin biosynthesis, plants and bacteria, GTP => riboflavin/FMN/FAD	M00125 : Riboflavin biosynthesis, plants and bacteria, GTP => riboflavin/FMN/FAD	M00125 : Riboflavin biosynthesis, plants and bacteria, GTP => riboflavin/FMN/FAD	M00126 : Tetrahydrofolate biosynthesis, GTP => THF	M00126 : Tetrahydrofolate biosynthesis, GTP => THF	M00126 : Tetrahydrofolate biosynthesis, GTP => THF	M00126 : Tetrahydrofolate biosynthesis, GTP => THF	M00126 : Tetrahydrofolate biosynthesis, GTP => THF	M00126 : Tetrahydrofolate biosynthesis, GTP => THF	M00126 : Tetrahydrofolate biosynthesis, GTP => THF	M00126 : Tetrahydrofolate biosynthesis, GTP => THF	M00126 : Tetrahydrofolate biosynthesis, GTP => THF	M00126 : Tetrahydrofolate biosynthesis, GTP => THF	M00126 : Tetrahydrofolate biosynthesis, GTP => THF	M00126 : Tetrahydrofolate biosynthesis, GTP => THF
		M00019	K00053	K00826	K01652	K01653	K01687	K11258	M00119	K00077	K00606	K00826	M00120	K00859	K00867	K00954	K01598	K01922	K01947	K02201	K02318	K03525	K09680	K13038	K21977	M00125	K00082	K01497	K01498	K11752	K14652	K20860	K20861	K20862	K21063	K21064	K22912	M00126	K00287	K00796	K00950	K01077	K01113	K01495	K01633	K08310	K09007	K11754	K13939
Bacteria;Atribacterota;Atribacterales;Atribacteraceae;Atribacter;Atribacter laminatus	Atribacter-laminus-RT761_CP065383.1	1	1	1	1	1	2	0	0.333333	0	0	1	1	1	0	1	0	0	0	0	0	1	0	1	0	0	0	0	0	0	0	0	0	0	0	0	0	0.2	0	0	0	0	0	0	0	0	0	1	0
Bacteria;Atribacterota;Atribacterales;Atribacteraceae;Atribacter;Atribacter sp002069605	Caldatribacteriales_UBA8910-UBA8910_sp002069605-GCA_002069605.1	1	1	1	1	1	1	0	0.333333	0	0	1	1	1	0	1	0	0	0	0	0	1	0	1	0	0	0	0	0	0	0	0	0	0	0	0	0	0.2	0	0	0	0	0	0	0	0	0	1	0
Bacteria;Atribacterota;Atribacterales;Atribacteraceae;Atribacter;Atribacter sp002069605	_GCA_012837485.1	1	1	1	1	1	1	0	0.333333	0	0	1	1	1	0	1	0	0	0	0	0	1	0	1	0	0	0	0	0	0	0	0	0	0	0	0	0	0.2	0	0	0	0	0	0	0	0	0	1	0
Bacteria;Atribacterota;Atribacterales;Atribacteraceae;Atribacter;Atribacter sp003542295	_GCA_003486325.1	1	1	1	2	1	1	0	0.333333	0	0	1	0.666667	1	0	1	0	0	0	0	0	0	0	1	0	0	0	0	0	0	0	0	0	0	0	0	0	0.2	0	0	0	0	0	0	0	0	0	2	0
Bacteria;Atribacterota;Atribacterales;Atribacteraceae;Atribacter;Atribacter sp003542295	_GCA_003542295.1	1	1	1	1	1	1	0	0.333333	0	0	1	1	1	0	1	0	0	0	0	0	1	0	1	0	0	0	0	0	0	0	0	0	0	0	0	0	0.2	0	0	0	0	0	0	0	0	0	1	0
Bacteria;Atribacterota;Atribacterales;Atribacteraceae;Atribacter;Atribacter sp012517485	Caldatribacteriales_UBA8910-UBA8910_sp012517485-GCA_012517485.1	1	1	1	1	1	1	0	0.333333	0	0	1	1	1	0	1	0	0	0	0	0	1	0	1	0	0	0	0	0	0	0	0	0	0	0	0	0	0.4	0	0	0	1	0	0	0	0	0	1	0
Bacteria;Atribacterota;Atribacterales;Atribacteraceae;Atribacter;Atribacter sp012517635	Caldatribacteriales_UBA8910-UBA8910_sp012517635-GCA_012517635.1	1	2	1	1	1	1	0	0.333333	0	0	1	1	1	0	1	0	0	0	0	0	1	0	1	0	0	0	0	0	0	0	0	0	0	0	0	0	0.4	0	0	1	1	0	0	1	0	0	1	0
Bacteria;Atribacterota;Atribacterales;Atribacteraceae;Atribacter;Atribacter sp018056205	_GCA_018056205.1	0.8	1	0	1	1	1	0	0	0	0	0	1	1	0	1	0	0	0	0	0	1	0	1	0	0	0	0	0	0	0	0	0	0	0	0	0	0.2	0	0	0	0	0	0	0	0	0	1	0
Bacteria;Atribacterota;Atribacterales;Atribacteraceae;SKXZ01;SKXZ01 sp003561145	_GCA_003561145.1	1	1	1	1	1	1	0	0.333333	0	0	1	1	1	0	1	0	0	0	0	0	1	0	1	0	0	0	0	0	0	0	0	0	0	0	0	0	0	0	0	0	0	0	0	0	0	0	0	0
Bacteria;Atribacterota;Atribacterales;Atribacteraceae;SKXZ01;SKXZ01 sp007128145	_GCA_007119915.1	0.8	1	0	2	1	1	0	0.333333	1	0	0	0.666667	1	0	1	0	0	0	0	0	1	0	0	0	0	0	0	0	0	0	0	0	0	0	0	0	0.4	0	0	0	1	0	0	0	0	0	1	0
Bacteria;Atribacterota;Atribacterales;Atribacteraceae;SKXZ01;SKXZ01 sp007128145	_GCA_007128145.1	1	1	1	1	1	1	0	0.666667	1	0	1	0.666667	1	0	1	0	0	0	0	0	1	0	0	0	0	0	0	0	0	0	0	0	0	0	0	0	0.4	0	0	0	1	0	0	0	0	0	1	0
Bacteria;Atribacterota;Atribacterales;Caldatribacteriaceae;Caldatribacterium;Caldatribacterium californiense_A	Caldatribacterium-californiense-GCA_000353875.1	1	1	1	1	1	1	0	0.333333	0	0	1	0.666667	1	0	0	0	0	0	0	0	1	0	1	0	0	0	0	0	0	0	0	0	0	0	0	0	0.2	0	0	0	4	0	0	0	0	0	0	0
Bacteria;Atribacterota;Atribacterales;Caldatribacteriaceae;Caldatribacterium;Caldatribacterium inferamans	Caldatribacterium-inferamans-SIUC1	1	1	1	1	1	1	0	0.333333	0	0	1	1	1	0	1	0	0	0	0	0	1	0	1	0	0	0	0	0	0	0	0	0	0	0	0	0	0.4	0	0	0	2	0	0	0	0	0	1	0
Bacteria;Atribacterota;Atribacterales;Caldatribacteriaceae;Caldatribacterium;Caldatribacterium saccharofermentans	Caldatribacterium-saccharofermentans-GBS	1	1	1	1	1	1	0	0.333333	0	0	1	1	1	0	1	0	0	0	0	0	1	0	1	0	0	0	0	0	0	0	0	0	0	0	0	0	0.4	0	0	0	2	0	0	0	0	0	1	0
Bacteria;Atribacterota;Atribacterales;Caldatribacteriaceae;Caldatribacterium;Caldatribacterium saccharofermentans	_GCA_000347575.1	1	1	1	1	1	1	0	0.333333	0	0	1	1	1	0	1	0	0	0	0	0	1	0	1	0	0	0	0	0	0	0	0	0	0	0	0	0	0.4	0	0	0	2	0	0	0	0	0	1	0
Bacteria;Atribacterota;Atribacterales;Caldatribacteriaceae;Caldatribacterium;Caldatribacterium sp014359405	Caldatribacterium-sp014359405-GCA_014359405.1	1	1	1	1	1	1	0	0.333333	0	0	1	1	1	0	1	0	0	0	0	0	1	0	1	0	0	0	0	0	0	0	0	0	0	0	0	0	0.4	0	0	0	1	0	0	0	0	0	1	0
Bacteria;Atribacterota;Atribacterales;Caldatribacteriaceae;JABUEZ01;JABUEZ01 sp013314795	Caldatribacteriaceae_JABUEZ01-JABUEZ01_sp013314795-GCA_013314795.1	1	1	1	1	1	1	0	0.333333	0	0	1	1	1	0	1	0	0	0	0	0	1	0	1	0	0	0	0	0	0	0	0	0	0	0	0	0	0.4	0	0	0	2	0	0	0	0	0	1	0
Bacteria;Atribacterota;Atribacterales;Caldatribacteriaceae;UBA3950;UBA3950 sp002385475	Caldatribacteriaceae_UBA3950-UBA3950_sp002385475-GCA_002385475.1	1	1	1	2	1	1	0	0.333333	0	0	1	1	1	0	1	0	0	0	0	0	1	0	1	0	0	0	0	0	0	0	0	0	0	0	0	0	0.4	0	0	0	1	0	0	0	0	0	1	0
Bacteria;Atribacterota;Atribacterales;Caldatribacteriaceae;UBA3950;UBA3950 sp002385475	_GCA_012728195.1	1	1	1	2	1	1	0	0.333333	0	0	1	1	1	0	1	0	0	0	0	0	1	0	1	0	0	0	0	0	0	0	0	0	0	0	0	0	0.4	0	0	0	1	0	0	0	0	0	1	0
Bacteria;Atribacterota;Atribacterales;Caldatribacteriaceae;UBA3950;UBA3950 sp018056825	_GCA_018056825.1	0	0	0	0	0	0	0	0	0	0	0	0.666667	1	0	0	0	0	0	0	0	1	0	1	0	0	0	0	0	0	0	0	0	0	0	0	0	0	0	0	0	0	0	0	0	0	0	0	0
Bacteria;Atribacterota;SB-45;34-128;34-128;34-128 sp000405345	_GCA_000405345.1	0.6	1	0	1	1	0	0	0	0	0	0	0	0	0	0	0	0	0	0	0	0	0	0	0	0	0	0	0	0	0	0	0	0	0	0	0	0.2	0	0	0	0	0	0	0	0	0	0	0
Bacteria;Atribacterota;SB-45;34-128;34-128;34-128 sp000405605	_GCA_000405605.1	0.8	1	0	1	1	1	0	0	0	0	0	0.333333	0	0	1	0	0	0	0	0	1	0	0	0	0	0	0	0	0	0	0	0	0	0	0	0	0.2	0	0	0	0	0	0	0	0	0	0	0
Bacteria;Atribacterota;SB-45;34-128;34-128;34-128 sp001773955	Caldatribacteriota_JS1-34_128_sp001773955-GCA_001773955.1	0.8	1	1	1	1	0	0	0.666667	1	0	1	1	1	0	1	0	0	0	0	0	1	0	1	0	0	0	0	0	0	0	0	0	0	0	0	0	0.2	0	0	0	0	0	0	0	0	0	0	0
Bacteria;Atribacterota;SB-45;34-128;34-128;34-128 sp002084865	_GCA_002084865.1	0	0	0	0	0	0	0	0	0	0	0	0.333333	1	0	0	0	0	0	0	0	1	0	0	0	0	0	0	0	0	0	0	0	0	0	0	0	0	0	0	0	0	0	0	0	0	0	0	0
Bacteria;Atribacterota;SB-45;34-128;34-128;34-128 sp002849045	_GCA_002849045.2	0.8	1	0	1	1	1	0	0.333333	1	0	0	1	1	0	1	0	0	0	0	0	1	0	1	0	0	0	0	0	0	0	0	0	0	0	0	0	0.2	0	0	0	0	0	0	0	0	0	1	0
Bacteria;Atribacterota;SB-45;34-128;34-128;34-128 sp003451675	_GCA_003451675.1	1	1	1	1	1	1	0	0.666667	1	0	1	1	1	0	1	0	0	0	0	0	1	0	1	0	0	0	0	0	0	0	0	0	0	0	0	0	0.4	0	0	0	0	0	0	0	0	0	1	0
Bacteria;Atribacterota;SB-45;34-128;34-128;34-128 sp003527405	_GCA_003527405.1	0.8	1	1	1	1	0	0	1	2	1	1	1	1	0	1	0	0	0	0	0	1	0	1	0	0	0	0	0	0	0	0	0	0	0	0	0	0.2	0	0	0	0	0	0	0	0	0	1	0
Bacteria;Atribacterota;SB-45;34-128;34-128;34-128 sp003575245	_GCA_003575245.1	0.8	1	3	1	1	0	0	1	2	2	3	1	1	0	1	0	0	0	0	0	2	0	2	0	0	0	0	0	0	0	0	0	0	0	0	0	0.4	0	0	0	0	0	0	0	0	0	1	0
Bacteria;Atribacterota;SB-45;34-128;34-128;34-128 sp011056645	Caldatribacteriota_JS1-34_128_sp011056645-GCA_011056645.1	1	1	1	1	1	1	0	1	1	1	1	1	1	0	1	0	0	0	0	0	1	0	1	0	0	0	0	0	0	0	0	0	0	0	0	0	0.4	0	0	0	0	0	0	0	0	0	1	0
Bacteria;Atribacterota;SB-45;34-128;34-128;34-128 sp014894735	_GCA_014894735.1	0.6	0	1	1	1	0	0	1	1	1	1	1	1	0	1	0	0	0	0	0	1	0	1	0	0	0	0	0	0	0	0	0	0	0	0	0	0.4	0	0	0	0	0	0	0	0	0	1	0
Bacteria;Atribacterota;SB-45;34-128;CG2-30-33-13;CG2-30-33-13 sp002782675	_GCA_001873345.1	1	1	1	1	1	1	1	0.666667	1	0	1	1	1	0	1	0	0	0	0	0	1	0	1	0	0	0	0	0	0	0	0	0	0	0	0	0	0.4	0	0	0	0	0	0	0	0	0	1	0
Bacteria;Atribacterota;SB-45;34-128;CG2-30-33-13;CG2-30-33-13 sp002782675	_GCA_002779155.1	0.8	0	1	1	1	1	1	0.666667	1	0	1	1	1	0	1	0	0	0	0	0	1	0	1	0	0	0	0	0	0	0	0	0	0	0	0	0	0.2	0	0	0	0	0	0	0	0	0	1	0
Bacteria;Atribacterota;SB-45;34-128;CG2-30-33-13;CG2-30-33-13 sp002782675	_GCA_002781685.1	1	1	1	1	1	1	1	0.666667	1	0	1	1	1	0	1	0	0	0	0	0	1	0	1	0	0	0	0	0	0	0	0	0	0	0	0	0	0.2	0	0	0	0	0	0	0	0	0	1	0
Bacteria;Atribacterota;SB-45;34-128;CG2-30-33-13;CG2-30-33-13 sp002782675	_GCA_002782675.1	1	1	1	1	1	1	1	0.666667	1	0	1	1	1	0	1	0	0	0	0	0	1	0	1	0	0	0	0	0	0	0	0	0	0	0	0	0	0.2	0	0	0	0	0	0	0	0	0	1	0
Bacteria;Atribacterota;SB-45;34-128;CG2-30-33-13;CG2-30-33-13 sp002782675	_GCA_002784285.1	1	1	1	1	1	1	1	0.666667	1	0	1	1	1	0	1	0	0	0	0	0	1	0	1	0	0	0	0	0	0	0	0	0	0	0	0	0	0.2	0	0	0	0	0	0	0	0	0	1	0
Bacteria;Atribacterota;SB-45;34-128;CG2-30-33-13;CG2-30-33-13 sp002782675	_GCA_002789755.1	1	1	1	1	1	1	1	0.666667	1	0	1	1	1	0	1	0	0	0	0	0	1	0	1	0	0	0	0	0	0	0	0	0	0	0	0	0	0.2	0	0	0	0	0	0	0	0	0	1	0
Bacteria;Atribacterota;SB-45;34-128;UBA4082;UBA4082 sp002383355	Caldatribacteriota_JS1-UBA4082_sp002383355-GCA_002383355.1	1	1	1	1	1	1	0	0.666667	1	0	1	1	1	0	1	0	0	0	0	0	1	0	1	0	0	0	0	0	0	0	0	0	0	0	0	0	0.4	0	0	0	1	0	0	0	0	0	1	0
Bacteria;Atribacterota;SB-45;34-128;UBA4082;UBA4082 sp002383355	_GCA_002418655.1	1	1	1	1	1	1	0	0.666667	1	0	1	1	1	0	1	0	0	0	0	0	1	0	1	0	0	0	0	0	0	0	0	0	0	0	0	0	0.6	0	0	0	1	0	0	0	0	0	1	0
Bacteria;Atribacterota;SB-45;34-128;UBA6251;UBA6251 sp002441285	_GCA_002441285.1	1	1	1	1	1	1	0	1	1	2	1	0.333333	1	0	0	0	0	0	0	0	1	0	0	0	0	0	0	0	0	0	0	0	0	0	0	0	0.4	0	0	0	0	0	0	0	0	0	1	0
Bacteria;Atribacterota;SB-45;34-128;UBA9904;UBA9904 sp003513845	_GCA_003513845.1	1	1	1	1	1	1	0	1	1	1	1	1	1	0	1	0	0	0	0	0	1	0	1	0	0	0	0	0	0	0	0	0	0	0	0	0	0.2	0	0	0	0	0	0	0	0	0	0	0
Bacteria;Atribacterota;SB-45;UBA6794;JAAYOB01;JAAYOB01 sp012520575	Caldatribacteriota_JS1-UBA6794_sp012520575-GCA_012520575.1	0.2	0	1	0	0	0	0	1	3	2	1	1	1	0	1	0	0	0	0	0	1	0	1	0	0	0	0	0	0	0	0	0	0	0	0	0	0.4	0	0	0	0	0	0	0	0	0	1	0
Bacteria;Atribacterota;SB-45;UBA6794;JAFGSC01;JAFGSC01 sp016934875	_GCA_016934875.1	0.6	0	1	1	1	0	0	0.666667	0	1	1	0.333333	1	0	0	0	0	0	0	0	0	0	1	0	0.333333	0	0	0	0	0	0	0	0	0	1	0	0.4	0	0	0	0	1	0	0	0	0	1	0
Bacteria;Atribacterota;SB-45;UBA6794;M30B28;M30B28 sp018402425	_GCA_018400375.1	1	1	1	2	2	1	0	0.666667	1	0	1	0.666667	0	0	1	0	0	0	0	0	1	0	1	0	0	0	0	0	0	0	0	0	0	0	0	0	0.2	0	0	0	0	0	0	0	0	0	1	0
Bacteria;Atribacterota;SB-45;UBA6794;M30B28;M30B28 sp018402425	_GCA_018400815.1	0.8	0	1	1	1	1	0	0.333333	0	0	1	1	1	0	1	0	0	0	0	0	1	0	1	0	0.333333	0	0	0	0	0	0	0	0	0	1	0	0.2	0	0	0	0	0	0	0	0	0	1	0
Bacteria;Atribacterota;SB-45;UBA6794;M30B28;M30B28 sp018402425	_GCA_018402425.1	1	1	1	2	2	1	0	1	1	1	1	0.666667	1	0	0	0	0	0	0	0	1	0	1	0	0.333333	0	0	0	0	0	0	0	0	0	1	0	0.4	0	0	0	0	0	0	0	0	0	1	0
Bacteria;Atribacterota;SB-45;UBA6794;UBA6794;UBA6794 sp002452835	_GCA_002452835.1	1	1	1	2	2	1	0	0.666667	1	0	1	0.666667	1	0	0	0	0	0	0	0	1	0	1	0	0	0	0	0	0	0	0	0	0	0	0	0	0.2	0	0	0	0	0	0	0	0	0	0	0
Bacteria;Atribacterota;SB-45;UBA6794;UBA6794;UBA6794 sp018054125	_GCA_018054125.1	1	1	1	2	3	1	0	1	2	2	1	1	1	0	1	0	0	0	0	0	1	0	1	0	0	0	0	0	0	0	0	0	0	0	0	0	0.2	0	0	0	0	0	0	0	0	0	1	0
Archaea;Methanobacteriota;Methanobacteriales;Methanothermobacteraceae;Methanothermobacter;Methanothermobacter thermautotrophicus	Methanothermobacter-thermautotrophicus-DeltaH_GCA_000008645.1	1	1	1	2	1	1	0	0.333333	0	0	1	0.333333	0	0	0	0	0	0	1	0	0	0	1	0	0.333333	0	0	0	1	0	0	0	0	0	0	0	0	0	0	0	0	0	0	0	0	0	0	0
Bacteria;Desulfobacterota;Thermodesulfobacteriales;Thermodesulfobacteriaceae;Thermodesulfobacterium;Thermodesulfobacterium commune	Thermodesulfobacterium-commune-DSM2178_CP008796.1	1	1	1	1	1	1	0	1	1	1	1	1	1	0	1	0	0	0	0	0	1	0	1	0	0.666667	0	1	0	1	1	0	0	0	0	0	0	0.4	0	1	1	0	0	0	0	0	1	1	0
Bacteria;Desulfobacterota;Thermodesulfobacteriales;Thermodesulfobacteriaceae;Thermodesulfobacterium;Thermodesulfobacterium hveragerdense	Thermodesulfobacterium-hveragerdense-DSM12571_GCF_000423845.1	1	1	1	1	1	1	0	1	1	1	1	1	1	0	1	0	0	0	0	0	1	0	1	0	0.666667	0	1	0	1	1	0	0	0	0	0	0	0.4	0	1	1	0	0	0	0	0	1	1	0
Bacteria;Desulfobacterota;Thermodesulfobacteriales;Thermodesulfobacteriaceae;Thermodesulfobacterium;Thermodesulfobacterium sp008630935	Thermodesulfobacterium-auxiliatoris-TA1_CP043908.1	1	1	1	2	1	1	0	1	2	1	1	1	1	0	1	0	0	0	0	0	1	0	1	0	0.666667	0	1	0	1	1	0	0	0	0	0	0	0.4	0	1	1	0	0	0	0	0	1	1	0
Bacteria;Desulfobacterota;Thermodesulfobacteriales;Thermodesulfobacteriaceae;Thermodesulfobacterium;Thermodesulfobacterium sp008630935	Thermodesulfobacterium-sp008630935-DasTool_Bin003	1	1	1	2	1	1	0	1	2	1	1	1	1	0	1	0	0	0	0	0	1	0	1	0	0.666667	0	1	0	1	1	0	0	0	0	0	0	0.4	0	1	1	0	0	0	0	0	1	1	0
[truncated: 83 more columns]

## Sheet: Supplementary Data 6
Supplementary Data 6. Quantification of vitamins in SRB cultures and Wolin's vitamin soution that was filter-sterilized or autoclaved.
	Vitamin B1 Thiamin*	Vitamin B2 Riboflavin	Vitamin B3 Niacin	Vitamin B3-amide Niacinamide	Vitamin B5 Pantothenic acid	Vitamin B6 Pyridoxine	Vitamin B7 Biotin	Vitamin B9 Folate	Vitamin B12			Vitamin B1 Thiamin*	Vitamin B2 Riboflavin	Vitamin B3 Niacin	Vitamin B3-amide Niacinamide	Vitamin B5 Pantothenic acid	Vitamin B6 Pyridoxine	Vitamin B7 Biotin	Vitamin B9 Folate	Vitamin B12
Sample names and replicates
LEVEL OF DETECTION (LOD)	0.0297203	0.0167857	0.183434	0.137996	0.0113342	0.00783303	0.00300575	0.254688	0.672268	ng/mL
Uninoculated SRB medium 1	< LOD	0.0647339	< LOD	< LOD	< LOD	0.0935565	< LOD	< LOD	< LOD	ng/mL
Uninoculated SRB medium 2	< LOD	0.0647339	< LOD	< LOD	< LOD	0.0578596	< LOD	< LOD	< LOD	ng/mL
Uninoculated SRB medium 3	< LOD	0.0643576	< LOD	< LOD	< LOD	0.127393	< LOD	< LOD	< LOD	ng/mL
T. auxiliatoris 1	< LOD	0.504322	< LOD	7.43711	3.44191	0.1279	< LOD	< LOD	< LOD	ng/mL
T. auxiliatoris 2	< LOD	0.47045	< LOD	7.69356	3.68306	0.0999854	< LOD	< LOD	< LOD	ng/mL
T. auxiliatoris 3	< LOD	0.481741	< LOD	7.74241	4.75729	0.0603973	< LOD	< LOD	< LOD	ng/mL
T. commune 1	< LOD	0.88821	< LOD	8.9514	14.5788	0.0537992	< LOD	< LOD	< LOD	ng/mL
T. commune 2	< LOD	0.797883	< LOD	8.67052	11.2903	0.0974477	< LOD	< LOD	< LOD	ng/mL
T. commune 3	< LOD	0.827992	< LOD	8.90255	14.5349	0.0910188	< LOD	< LOD	< LOD	ng/mL
T. hveragerdense 1	< LOD	0.356413	0.256069	32.1176	16.2669	0.0937257	< LOD	< LOD	< LOD	ng/mL
T. hveragerdense 2	< LOD	0.545722	0.263455	34.0715	19.9938	0.105737	< LOD	< LOD	< LOD	ng/mL
T. hveragerdense 3	< LOD	0.369209	0.2573	35.9033	18.7661	0.0991395	< LOD	< LOD	< LOD	ng/mL
Thermodesulfovibrio 1	< LOD	0.128339	0.486284	1.66083	< LOD	0.0925415	< LOD	< LOD	< LOD	ng/mL
Thermodesulfovibrio 2	< LOD	1.15543	0.483822	1.74632	< LOD	0.108106	< LOD	< LOD	< LOD	ng/mL
Thermodesulfovibrio 3	< LOD	1.53931	0.504751	1.55092	< LOD	0.128577	< LOD	< LOD	< LOD	ng/mL
Filtered Vitamins 10x 1	7244.33	914.555	647.559	< LOD	1157.53	874.661	174.065	< LOD	30.3605	ng/mL		14.4887	1.82911	1.29512	< LOD	2.31507	0.874661	0.870323	< LOD	3.03605	Yield based on expected amount in 100x vitamin solution
Filtered Vitamins 10x 2	7509.69	861.864	562.613	< LOD	1012.84	823.907	161.503	< LOD	18.9753	ng/mL		15.0194	1.72373	1.12523	< LOD	2.02569	0.823907	0.807516	< LOD	1.89753	Yield based on expected amount in 100x vitamin solution
Filtered Vitamins 10x 3	7801.58	907.028	602.008	< LOD	1091.77	872.969	168.905	< LOD	23.0415	ng/mL		15.6032	1.81406	1.20402	< LOD	2.18353	0.872969	0.844527	< LOD	2.30415	Yield based on expected amount in 100x vitamin solution
Autoclaved Vitamins 10x 1	8783.42	888.21	444.427	< LOD	1041.34	784.995	224.31	21.5403	20.7373	ng/mL		17.5668	1.77642	0.888854	< LOD	2.08268	0.784995	1.12155	0.107702	2.07373	Yield based on expected amount in 100x vitamin solution
Autoclaved Vitamins 10x 2	8783.42	782.829	387.797	< LOD	879.112	749.467	222.964	16.5084	15.9935	ng/mL		17.5668	1.56566	0.775593	< LOD	1.75822	0.749467	1.11482	0.0825418	1.59935	Yield based on expected amount in 100x vitamin solution
Autoclaved vitamins 10x 3	6634	733.902	326.242	< LOD	754.151	658.11	214.889	15.9345	13.9604	ng/mL		13.268	1.4678	0.652483	< LOD	1.5083	0.65811	1.07444	0.0796727	1.39604	Yield based on expected amount in 100x vitamin solution
Yeast ext 0.1% 1	1037.56	154.308	158.812	1012.37	523.96	60.2281	7.76113	< LOD	< LOD	ng/mL
Yeast ext 0.1% 2	1151.66	171.62	174.816	1051.45	569.998	64.2884	8.12002	< LOD	< LOD	ng/mL
Yeast ext 0.1% 3	1273.73	167.857	168.661	1013.6	565.613	63.95	8.59107	< LOD	< LOD	ng/mL
* Thiamin was accidentally added in 10-fold excess to the vitamin solution for the vitamin analysis experiments only (i.e., Filtered Vitamins 10x and Autoclaved Vitamins 10x). This mistake was not made for any cultivation experiments.

## Sheet: Supplementary Data 7
Supplementary Data 7. Dimensions of C. saccharofermentans GBST cell structures measured by cryo-EM.
All measurements are in units of nm
Square 1, target 7
cell1	Cell width	Cell length	Width beween outer LML and middle LML (possible periplasm)	Flagella width	Inner comparment length	Inner compartment width	Inner compartment tip to cell tip	Inner compartment to lateral suface
	765.3	2451	8.59	NA	1695.9	686.2	319.7	45.83
	801.9		9.78	NA		719.3	440.2	51.87
	798.1		11.15	NA		671.2		53.22
Square 1, target 9c
cell 1	Cell width	Cell length	Width beween outer LML and middle LML (possible periplasm)	Flagella width	Inner comparment length	Inner compartment width	Inner compartment tip to cell tip	Inner compartment to lateral suface
	787.89	2574.3	9.2	NA	1864.5	557.7	338	103.76
	797.4		10.4	NA		661.1	397.7	109.13
	799.1		10.6	NA		558.1		143.07
Square 1, target 11
cell 1	Cell width	Cell length	Width beween outer LML and middle LML (possible periplasm)	Flagella width	Inner comparment length	Inner compartment width	Inner compartment tip to cell tip	Inner compartment to lateral suface
	765.67	2125.8	8.7	NA	1454	730.9	286.85	52.31
	831.8		8.2	NA		759.4	379.42	47.99
	849.4		10.7	NA		765.7		43.58
Square 2, target 1
cell 1	Cell width	Cell length	Width beween outer LML and middle LML (possible periplasm)	Flagella width	Inner comparment length	Inner compartment width	Inner compartment tip to cell tip	Inner compartment to lateral suface
	889.9	2418.2	7.97	NA	1628.1	722.3	375.4	79.65
	896.4		10.4	NA		725.7	427.6	95.2
	866.26		9.9	NA		702.9		51.41
Square 2, target 4
cell 1	Cell width	Cell length	Width beween outer LML and middle LML (possible periplasm)	Flagella width	Inner comparment length	Inner compartment width	Inner compartment tip to cell tip	Inner compartment to lateral suface
	779.6	2976.6	10.8	NA	2212.7	698.4	385.6	54.74
	792.5		8.9	NA		701.8	368.1	44.07
	821.9		10.7	NA		696.2		41.47
average	816.208	2509.18	9.73267	NA	1771.04	690.46	371.857	67.82
stdev	42.0651	308.774	1.05214	NA	287.398	60.893	46.9178	30.9627

## Sheet: Supplementary Data 8
Supplementary Data 8. Dimensions of C. inferamans SIUC1T cell structures measured by cryo-EM.
All measurements are in units of nm
Image 1
Cell 1	Cell width	Cell length	Periplasm width	Flagella width	Inner comparment length	Inner compartment width	Inner compartment tip to cell tip	Inner compartment to lateral surface
	727.2	NA	13.2	17.1	2732.5	586.9	386.9	89.28
	775.5		10.4	15.6		556.5		102.54
	731.1		10.8	16.5		561.73		38.35
Image 10
Cell 1 (top)	Cell width	Cell length	Width beween outer LML and middle LML (possible periplasm)	Flagella width	Inner comparment length	Inner compartment width	Inner compartment tip to cell tip	Inner compartment to lateral surface
	676.8	1599.6	15.62	17.6	1070.2	443.2	275.94	47.11
	642.4		10.76	17.8		525.6	230.95	104.96
	563.6		9.17	19.1		435.6		75.96
Cell 2 (bottom)	Cell width	Cell length	Width beween outer LML and middle LML (possible periplasm)	Flagella width	Inner comparment length	Inner compartment width	Inner compartment tip to cell tip	Inner compartment to lateral surface
	496.82	NA	NA	18.3	1860.17	331.5	534	86.61
	525.92		NA	21.9		432.9		75.44
	556.79		NA	16.9		467.37		38.99
Image 13	Cell width	Cell length	Width beween outer LML and middle LML (possible periplasm)	Flagella width	Inner comparment length	Inner compartment width	Inner compartment tip to cell tip	Inner compartment to lateral surface
Cell 1 (top)	638.4	2585.93	12.5	NA	1730	513.9	400.9	89.93
	660		9.7	NA		543.5	450.3	64.51
	680.7		8.73	NA		573.1		49.8
Cell 2 (bottom)	Cell width	Cell length	Width beween outer LML and middle LML (possible periplasm)	Flagella width	Inner comparment length	Inner compartment width	Inner compartment tip to cell tip	Inner compartment to lateral surface
	587.1	2599.1	11.6	NA	1899.4	498.3	357.4	74.14
	651.3		11.1	NA		550.1	343.65	61.47
	638.8		10.8	NA		535.2		61.36
Image 16
Cell 1	Cell width	Cell length	Width beween outer LML and middle LML (possible periplasm)	Flagella width	Inner comparment length	Inner compartment width	Inner compartment tip to cell tip	Inner compartment to lateral surface
	697.5	2263.1	9.78	18.4	1565.6	452.86	369.3	24.76
	558.1		8.23	17.2		575.31	329.4	15.69
	642.3		10.76	16.5		497.1		17.03
average	636.129	2261.93	10.8767	17.7417	1809.64	504.482	367.874	62.1072
stdev	75.395	468.096	1.86096	1.62338	543.13	66.5381	85.1296	27.8248

## Sheet: Supplementary Data 9
Supplementary Data 9. Acetate production from xylitol and fucose-grown cultures.
SIUC1
	Day 0	Day 0	Day 14	Day 14
	Xylitol	Acetate	Xylitol	Acetate
#1	12.2844	0.0848398	11.0322	1.74161				Xylitol - Day 0	12.2844										Fucose - Day 0	12.2844
#2	12.3709	0.0848398	11.1179	1.52511				Xylitol - Day 0	12.3709										Fucose - Day 0	12.3709
#3	12.3669	0.0848398	11.307	1.29347				Xylitol - Day 0	12.3669										Fucose - Day 0	12.3669
Average	12.3407	0.0848398	11.1524	1.52006				Xylitol - Day 14	11.0322										Fucose - Day 14	11.0322
St dev	0.0488171	1.69967e-17	0.1406	0.224114				Xylitol - Day 14	11.1179										Fucose - Day 14	11.1179
								Xylitol - Day 14	11.307										Fucose - Day 14	11.307
	Day 0	Day 0	Day 14	Day 14
	Fucose	Acetate	Fucose	Acetate
#1	10.8167	0.0848398	9.54995	1.39659
#2	10.6671	0.0848398	8.8786	2.91376
#3	10.8505	0.0848398	9.0878	2.73767
Average	10.7781	0.0848398	9.17212	2.34934				Acetate - Day 0	0.0848398										Acetate - Day 0	0.0848398
St dev	0.0975548	1.69967e-17	0.343528	0.82979				Acetate - Day 0	0.0848398										Acetate - Day 0	0.0848398
								Acetate - Day 0	0.0848398										Acetate - Day 0	0.0848398
								Acetate - Day 14	1.74161										Acetate - Day 14	1.74161
								Acetate - Day 14	1.52511										Acetate - Day 14	1.52511
								Acetate - Day 14	1.29347										Acetate - Day 14	1.29347
GBS
	Day 0	Day 0	Day 14	Day 14
	Xylitol	Acetate	Xylitol	Acetate				Xylitol - Day 0	11.8201										Fucose - Day 0	10.9678
#1	11.8201	0.0848398	8.96228	3.22738				Xylitol - Day 0	12.3142										Fucose - Day 0	11.0047
#2	12.3142	0.0848398	9.82118	2.71884				Xylitol - Day 0	11.9507										Fucose - Day 0	11.1365
#3	11.9507	0.0848398	10.8383	1.10976				Xylitol - Day 14	8.96228										Fucose - Day 14	7.37298
Average	12.0283	0.0848398	9.87392	2.35199				Xylitol - Day 14	9.82118										Fucose - Day 14	7.59584
St dev	0.256042	1.69967e-17	0.939126	1.10545				Xylitol - Day 14	10.8383										Fucose - Day 14	8.34379
	Day 0	Day 0	Day 14	Day 14
	Fucose	Acetate	Fucose	Acetate
#1	10.9678	0.0848398	7.37298	7.21712
#2	11.0047	0.0848398	7.59584	8.04147
#3	11.1365	0.0848398	8.34379	6.10549
Average	11.0363	0.0848398	7.77087	7.12136
St dev	0.0886798	1.69967e-17	0.508524	0.971538
								Acetate - Day 0	0.0848398										Acetate - Day 0	0.0848398
								Acetate - Day 0	0.0848398										Acetate - Day 0	0.0848398
								Acetate - Day 0	0.0848398										Acetate - Day 0	0.0848398
								Acetate - Day 14	3.22738										Acetate - Day 14	7.21712
								Acetate - Day 14	2.71884										Acetate - Day 14	8.04147
								Acetate - Day 14	1.10976										Acetate - Day 14	6.10549

## Sheet: Supplementary Data 10
Supplementary Data 10: Fatty acid composition (%) of Atribacteria isolates.
Fatty Acid	Caldatribacterium inferamans SIUC1T	Caldatribacterium saccharolyticum GBST	Atribacter laminatus RT761T	Thermatribacter velox B11T
Saturated fatty acids	86.3	64	92	74.9
C12:0	-	2.4	-	3.6
C14:0	1.6	2.2	-	2
C15:0	-	1.4	51	-
C16:0	33.3	37.2	10	21.3
C18:0	38.9	10.1	21	16.2
C20	-	-	-	1.6
C15:0 iso	11.4	8.3	10	17.6
C16:0 iso	-	-	-	0.6
C17:0 iso	1.1	2.4	-	2.9
C20:0 iso	-	-	-	1.9
C13:0 anteiso	-	-	-	0.9
C15:0 anteiso	-	-	-	3.8
C16:0 anteiso	-	-	-	1.3
C17:0 anteiso	-	-	-	1.2
Unsaturated fatty acids	0.7	1.3	2	18.5
C17:1 w5c iso	-	-	-	2.5
C17:1 w9c anteiso	-	-	-	5.1
C18:1 w9c	0.7	1.3	2	4.4
C18:3 w6c	-	-	-	1.2
Summed feature 3	-	-	-	3.9
Summed feature 8	-	-	-	1.4
Others	13	34.7	6	4.8
C13:0 iso 3OH	11.2	30	6	3.5
C15:0 iso 3OH	1.8	4.7	-	-
Summed feature 2	-	-	-	1.3
Atribacter laminatus data from Katayama et al., 2020
Thermatribacter velox B11T data from Jiao et al., 2024
Thermatribacter velox MT5 lipids were not reported in Kawamoto et al., 2024

[truncated: 1 more sheets: Supplementary Data 11]
